# Supplementary material for: Genetic divergence between populations of feral and domestic forms of a mosquito disease vector assessed by transcriptomics
Source: PeerJ. 2015 Feb 26;3:e807. doi: 10.7717/peerj.807 (PMC4349049; doi:10.7717/peerj.807)
Supplement: Table S1 — Observed and estimated Ka calculations, annotation and top-scoring Pfam IDs corresponding with 11,931 pairwise Culex pipiens forms pipiens and molestus homologous codon sequence alignments (ordered by decreasing Ka). Columns two and three denote genes present in the 95th percentile as ranked by Ka calculated using observed and likelihood estimated non-synonymous substitutions, respectively. [file peerj-03-807-s002.xlsx]

## Sheet: Table S1.
Cx. quinq reference	Observed Top 5%	Modeled Top 5%	Count Ka	Model Ka	Model Ks	Model Ka/Ks	Aln. Length	S-Sites	N-Sites	# Subst.	Count N-Subst.	Model S-Subst.	Modeled N-Subst.	Annotation	#GO terms	GO terms	Enzyme code	Top Pfam ID	Top Pfam annotation
CPIJ006559	Y	X	0.0428954	0.055305	0.1665	0.332163	348	91.5623	256.438	26	11	13.4695	12.5305	peptidoglycan recognition protein-lc	3	F:N-acetylmuramoyl-L-alanine amidase activity; P:peptidoglycan catabolic process; F:zinc ion binding	EC:3.5.1.28	PF01510	N-acetylmuramoyl-L-alanine amidase
CPIJ006502	Y	X	0.0425493	0.0560597	0.0555519	1.00914	246	57.9828	188.017	13	8	3.04287	9.95713	late trypsin	2	F:serine-type endopeptidase activity; P:proteolysis	EC:3.4.21.0	PF00089	Trypsin
CPIJ009879	Y	X	0.0422083	0.0748263	0.00175093	42.7351	288	74.7719	213.228	15	9	0.122082	14.8779	hypothetical protein CpipJ_CPIJ009879	0	-
CPIJ006899	Y	X	0.0415754	0.072103	0.240973	0.299216	570	112.999	457.001	53	19	23.9807	29.0193	conserved hypothetical protein	0	-
CPIJ007999	Y	X	0.040813	0.0460931	0.0105652	4.36274	345	99.9803	245.02	12	10	1.02637	10.9736	salivary c-type lectin	1	F:carbohydrate binding	-	PF00059	Lectin C-type domain
CPIJ006504	Y	X	0.0408028	0.0424188	0.0714239	0.593902	279	58.427	220.573	13	9	4.00975	8.99025	achain crystal structure of engineered northeast structural genomics consortium target	0	-		PF12796	Ankyrin repeats (3 copies)
CPIJ013865	Y	X	0.0387871	0.0461787	0.000923575	50	258	51.7462	206.254	9	8	0.0449341	8.95507	valyl-trna synthetase	6	F:valine-tRNA ligase activity; F:aminoacyl-tRNA editing activity; P:valyl-tRNA aminoacylation; P:regulation of translational fidelity; F:ATP binding; C:cytoplasm	EC:6.1.1.9	PF00133	tRNA synthetases class I (I, L, M and V)
CPIJ019253	Y	X	0.0379446	0.048969	0.0885246	0.553168	315	77.8124	237.188	17	9	6.32872	10.6713	salivary apyrase 5 nucleotidase	2	P:nucleotide catabolic process; F:5'-nucleotidase activity	EC:3.1.3.5	PF00149	Calcineurin-like phosphoesterase
CPIJ010660	Y	X	0.0378952	0.0411837	0.0141191	2.91689	147	67.8343	79.1657	4	3	0.908235	3.09176	conserved hypothetical protein	0	-
CPIJ019816	Y	X	0.0357857	0.0371991	0.0612067	0.607762	291	67.4466	223.553	12	8	3.98084	8.01916	conserved hypothetical protein	0	-		PF13855	Leucine rich repeat
CPIJ011420	Y	X	0.0357373	0.0383951	0.000767901	50	180	40.0903	139.91	5	5	0.0284911	4.97151	hypothetical protein CpipJ_CPIJ011420	0	-
CPIJ019905	Y	X	0.0356667	0.0411941	0.0682424	0.603644	561	140.44	420.56	25	15	8.90422	16.0958	hypothetical protein CpipJ_CPIJ019905	0	-
CPIJ000339	Y	X	0.0349382	0.0318549	0.00784138	4.06242	345	116.024	228.976	8	8	0.887181	7.11282	conserved hypothetical protein	0	-
CPIJ801390	Y	X	0.03405	0.0364821	0.0812403	0.449064	267	61.42	205.58	12	7	4.79411	7.20589	u2 snrnp auxiliary factor	5	F:metal ion binding; F:RNA binding; C:nucleus; F:nucleotide binding; F:zinc ion binding	-	PF13893	RNA recognition motif. (a.k.a. RRM, RBD, or RNP domain)
CPIJ004243	Y	X	0.0335333	0.0341235	0.122613	0.278302	309	70.4314	238.569	16	8	8.23606	7.76394	conserved hypothetical protein	0	-
CPIJ011886	Y	X	0.0331496	0.0441187	0.079205	0.557019	372	70.3374	301.663	18	10	5.3114	12.6886	conserved hypothetical protein	0	-		PF13504	Leucine rich repeat
CPIJ003752	Y	X	0.0329244	0.035843	0.0426922	0.839568	282	69.3916	212.608	10	7	2.79928	7.20072	fibrinogen and fibronectin	2	P:signal transduction; F:receptor binding	-	PF00147	Fibrinogen beta and gamma chains, C-terminal globular domain
CPIJ009726	Y	X	0.0326436	0.0329078	0.0528067	0.623175	432	125.661	306.339	16	10	6.35124	9.64876	hypothetical conserved secreted protein	3	P:tissue regeneration; C:integral to membrane; P:cell adhesion
CPIJ011171	Y	X	0.0314996	0.0317719	0.0629054	0.505074	213	54.2684	158.732	8	5	3.22931	4.77069	lwamide neuropeptides	1	P:neuropeptide signaling pathway	-
CPIJ018148	Y	X	0.0313344	0.0386853	0.044675	0.865927	213	53.4306	159.569	8	5	2.23085	5.76915	zinc finger protein 181	3	F:nucleic acid binding; C:nucleus; F:zinc ion binding	-	PF07776	Zinc-finger associated domain (zf-AD)
CPIJ017845	Y	X	0.0311055	0.031552	0.0414944	0.760392	123	26.5541	96.4459	4	3	1.06332	2.93668	hypothetical protein CpipJ_CPIJ017845	0	-
CPIJ000278	Y	X	0.0305916	0.0317601	0.114221	0.278059	531	138.735	392.265	26	12	14.5561	11.4439	tripartite motif protein	3	F:zinc ion binding; C:intracellular; F:metal ion binding	-	PF00643	B-box zinc finger
CPIJ003958	Y	X	0.0305438	0.0320849	0.0515435	0.622482	312	82.8215	229.179	11	7	4.04041	6.95959	hypothetical protein CpipJ_CPIJ003958	3	C:extracellular region; F:chitin binding; P:chitin metabolic process	-	PF01607	Chitin binding Peritrophin-A domain
CPIJ010087	Y	X	0.0304833	0.0350711	0.0339811	1.03207	330	100.366	229.634	11	7	3.27249	7.72751	fibrinogen gamma chain	2	P:signal transduction; F:receptor binding	-	PF00147	Fibrinogen beta and gamma chains, C-terminal globular domain
CPIJ016195	Y	X	0.0303626	0.042281	0.00084562	50	219	87.259	131.741	5	4	0.0653693	4.93463	hypothetical protein CpipJ_CPIJ016195	0	-
CPIJ005072	Y	X	0.0300563	0.035849	0.0457431	0.783702	549	116.479	432.521	20	13	5.11493	14.8851	conserved hypothetical protein	3	F:nucleic acid binding; C:nucleus; F:zinc ion binding	-	PF07776	Zinc-finger associated domain (zf-AD)
CPIJ017508	Y	X	0.030053	0.0305009	0.0103312	2.95232	336	103.078	232.922	8	7	1.04285	6.95715	hypothetical protein CpipJ_CPIJ017508	0	-
CPIJ012626	Y	X	0.0296326	0.0396356	0.0379575	1.04421	534	129.041	404.959	20	12	4.67621	15.3238	fibrinogen and fibronectin	2	P:signal transduction; F:receptor binding	-	PF00147	Fibrinogen beta and gamma chains, C-terminal globular domain
CPIJ012501	Y	X	0.0295561	0.0339167	0.0665189	0.50988	225	55.8297	169.17	9	5	3.53635	5.46365	clip-domain serine protease	2	F:serine-type endopeptidase activity; P:proteolysis	EC:3.4.21.0	PF00089	Trypsin
CPIJ013630	Y	X	0.0293384	0.031134	0.0376492	0.826951	438	131.235	306.765	14	9	4.77323	9.22677	hypothetical protein CpipJ_CPIJ013630	0	-
CPIJ801529	Y	X	0.028728	0.0452267	0.0938818	0.481741	366	52.7169	313.283	18	9	4.65976	13.3402	hypothetical protein AND_08600	0	-
CPIJ012186	Y	X	0.0285276	0.0384014	0.0636384	0.603431	297	86.6774	210.323	13	6	5.27549	7.72451	hypothetical protein CpipJ_CPIJ012186	0	-
CPIJ010208	Y	X	0.0278921	0.0296416	0.0973757	0.304404	348	97.0325	250.967	16	7	8.95195	7.04805	conserved hypothetical protein	0	-		PF12248	Farnesoic acid 0-methyl transferase
CPIJ006685	Y	X	0.0276541	0.0299878	0.0245713	1.22044	291	74.0336	216.966	8	6	1.74799	6.25201	zinc finger protein 79	3	F:nucleic acid binding; C:nucleus; F:zinc ion binding	-	PF13465	Zinc-finger double domain
CPIJ802483	Y	X	0.0276515	0.0300147	0.0299713	1.00145	1035	239.383	795.617	30	22	6.93091	23.0691	bchain crystal structure of lrim1apl1c complex	0	-		PF00560	Leucine Rich Repeat
CPIJ016965	Y	X	0.0273204	0.0305592	0.117448	0.260193	357	64.1793	292.821	15	8	6.85827	8.14173	odorant-binding protein 56e	1	F:odorant binding	-	PF01395	PBP/GOBP family
CPIJ014197	Y	X	0.0271649	0.027706	0.0809414	0.342297	231	83.7508	147.249	10	4	6.2429	3.7571	conserved hypothetical protein	3	C:extracellular region; F:chitin binding; P:chitin metabolic process	-	PF01607	Chitin binding Peritrophin-A domain
CPIJ012492	Y	X	0.027031	0.0283636	0.0267121	1.06183	294	72.0327	221.967	8	6	1.87266	6.12734	zinc finger protein	3	F:nucleic acid binding; C:nucleus; F:zinc ion binding	-	PF13465	Zinc-finger double domain
CPIJ015103	Y	X	0.026877	0.0274104	0.0383855	0.714083	585	138.522	446.478	17	12	5.14902	11.851	serine protease ii	2	F:serine-type endopeptidase activity; P:proteolysis	EC:3.4.21.0	PF00089	Trypsin
CPIJ011561	Y	X	0.026868	0.0315039	0.0939649	0.335273	411	76.0292	334.971	17	9	6.86272	10.1373	kda salivary peptide	0	-
CPIJ005906	Y	X	0.026785	0.0357202	0.0814513	0.438546	846	173.982	672.018	36	18	13.3635	22.6365	conserved hypothetical protein	0	-		PF05444	Protein of unknown function (DUF753)
CPIJ013466	Y	X	0.0267023	0.0297354	0.140621	0.211458	294	69.3	224.7	15	6	8.89872	6.10128	conserved hypothetical protein	0	-		PF03765	CRAL/TRIO, N-terminal domain
CPIJ802202	Y	X	0.0266596	0.0340444	0.122033	0.278977	510	134.9	375.1	27	10	15.2051	11.7949	steroid dehydrogenase	3	F:oxidoreductase activity; P:oxidation-reduction process; F:nucleotide binding	-	PF00106	short chain dehydrogenase
CPIJ007883	Y	X	0.0266018	0.0278427	0.101063	0.2755	687	160.72	526.28	29	14	15.2461	13.7539	phospholipase a1 member a	3	C:extracellular region; F:hydrolase activity; P:lipid metabolic process	-	PF00151	Lipase
CPIJ010737	Y	X	0.0265361	0.0279687	0.131595	0.212537	174	23.2615	150.738	7	4	2.94455	4.05545	sex-determining protein fem-1	0	-
CPIJ011811	Y	X	0.0264203	0.0263484	0.00052777	49.924	201	49.601	151.399	4	4	0.0260782	3.97392	pol-like protein	3	F:RNA binding; P:RNA-dependent DNA replication; F:RNA-directed DNA polymerase activity
CPIJ011347	Y	X	0.0260992	0.0264152	0.0132031	2.00068	273	81.423	191.577	6	5	1.05128	4.94872	ubiquitin conjugating enzyme 7 interacting protein	6	F:acetylcholine-activated cation-selective channel activity; C:postsynaptic membrane; C:cell junction; C:plasma membrane; P:ion transport; C:integral to membrane	-
CPIJ018146	Y	X	0.0260349	0.0270593	0.153914	0.175808	198	44.3603	153.64	10	4	6.21542	3.78458	salivary kazal 1	0	-		PF00050	Kazal-type serine protease inhibitor domain
CPIJ016507	Y	X	0.0260307	0.029702	0.0269171	1.10346	357	88.0867	268.913	10	7	2.28902	7.71098	membrane glycoprotein lig-1	0	-		PF13855	Leucine rich repeat
CPIJ017964	Y	X	0.02593	0.0298434	0.117635	0.253695	486	138.912	347.088	25	9	15.3009	9.69905	trypsin 7	2	F:serine-type endopeptidase activity; P:proteolysis	EC:3.4.21.0	PF00089	Trypsin
CPIJ014734	Y	X	0.0257702	0.0297075	0.0242764	1.22372	654	149.542	504.458	18	13	3.51011	14.4899	conserved hypothetical protein	1	F:DNA binding	-	PF05225	helix-turn-helix, Psq domain
CPIJ013119	Y	X	0.0250467	0.025579	0.128671	0.198794	348	68.5224	279.478	15	7	8.2836	6.7164	hypothetical protein CpipJ_CPIJ013119	0	-
CPIJ018633	Y	X	0.0248569	0.0251875	0.169441	0.148651	318	76.6176	241.382	17	6	11.5778	5.42215	glutathione-s-transferase theta	1	F:transferase activity	-	PF00043	Glutathione S-transferase, C-terminal domain
CPIJ000333	Y	X	0.024286	0.0337644	0.172462	0.195778	264	58.1203	205.88	16	5	9.44786	6.55214	aslectin al-1	2	P:signal transduction; F:receptor binding	-	PF00147	Fibrinogen beta and gamma chains, C-terminal globular domain
CPIJ001819	Y	X	0.0242759	0.0298226	0.113461	0.262844	528	116.068	411.932	24	10	12.4169	11.5831	conserved hypothetical protein	2	F:zinc ion binding; F:nucleic acid binding	-	PF00397	WW domain
CPIJ009716	Y	X	0.0242076	0.0266866	0.00938727	2.84285	285	78.4527	206.547	6	5	0.707167	5.29283	conserved hypothetical protein	0	-
CPIJ015900	Y	X	0.0241723	0.0387855	0.0378223	1.02547	216	50.5213	165.479	8	4	1.83535	6.16465	ctu2_culqu ame: full=cytoplasmic trna 2-thiolation protein 2	4	P:tRNA thio-modification; C:cytosol; P:tRNA wobble uridine modification; F:tRNA binding	-	PF10288	Protein of unknown function (DUF2392)
CPIJ801609	Y	X	0.0240909	0.0290305	0.136746	0.212295	810	187.357	622.643	41	15	24.0396	16.9604	conserved hypothetical protein	7	F:ATPase activity; F:ATP binding; C:integral to membrane; F:nucleotide binding; C:membrane; F:nucleoside-triphosphatase activity; P:ATP catabolic process
CPIJ015807	Y	X	0.0239435	0.0330511	0.0791948	0.41734	222	54.9398	167.06	9	4	3.96644	5.03356	conserved hypothetical protein	0	-
CPIJ006043	Y	X	0.0238534	0.0269328	0.087093	0.309242	450	114.618	335.382	18	8	9.44948	8.55052	methionine synthase mitochondrial	2	P:oxidation-reduction process; F:oxidoreductase activity	-	PF00667	FAD binding domain
CPIJ017592	Y	X	0.0236608	0.0254306	0.071562	0.355364	225	55.9443	169.056	8	4	3.85754	4.14246	vanin-like protein 1	2	F:hydrolase activity, acting on carbon-nitrogen (but not peptide) bonds, in linear amides; P:nitrogen compound metabolic process	EC:3.5.1.0
CPIJ015107	Y	X	0.0236162	0.0265652	0.0450026	0.590303	549	167.906	381.094	17	9	7.26556	9.73444	pre-pro-protease partial	4	C:membrane; F:scavenger receptor activity; P:proteolysis; F:serine-type endopeptidase activity	EC:3.4.21.0	PF00089	Trypsin
CPIJ017736	Y	X	0.0236097	0.0279455	0.196147	0.142472	306	51.8668	254.133	16	6	9.42243	6.57757	structural contituent of cuticle	1	F:structural constituent of cuticle	-	PF00379	Insect cuticle protein
CPIJ019671	Y	X	0.0235267	0.0210982	0.00900285	2.3435	402	104.466	297.534	7	7	0.9121	6.0879	conserved hypothetical protein	2	F:zinc ion binding; F:metal ion binding	-	PF13639	Ring finger domain
CPIJ008131	Y	X	0.0234937	0.0200641	0.015527	1.29221	318	62.612	255.388	6	6	0.956815	5.04318	receptor for activated protein kinase c	6	P:regulation of transcription, DNA-dependent; F:DNA binding; C:CCAAT-binding factor complex; F:sequence-specific DNA binding transcription factor activity; P:phosphorylation; F:kinase activity	-	PF01388	ARID/BRIGHT DNA binding domain
CPIJ008899	Y	X	0.0233558	0.0277043	0.0975773	0.283922	387	87.2876	299.712	16	7	8.10176	7.89824	salivary mucin	0	-
CPIJ016642	Y	X	0.0233251	0.0264814	0.0782724	0.338324	261	46.6386	214.361	9	5	3.52249	5.47751	cysteine-rich venom protein	0	-		PF01826	Trypsin Inhibitor like cysteine rich domain
CPIJ000332	Y	X	0.0232172	0.0259871	0.0495098	0.524888	486	141.428	344.572	15	8	6.58233	8.41767	aslectin al-1	2	P:signal transduction; F:receptor binding	-	PF00147	Fibrinogen beta and gamma chains, C-terminal globular domain
CPIJ006122	Y	X	0.0231701	0.0257777	0.0967662	0.266392	528	139.569	388.431	22	9	12.6336	9.36643	hypothetical protein CpipJ_CPIJ006122	0	-
CPIJ007764	Y	X	0.0231338	0.0267093	0.210048	0.127158	219	46.0927	172.907	13	4	8.80158	4.19842	conserved hypothetical protein	0	-		PF00612	IQ calmodulin-binding motif
CPIJ005223	Y	X	0.0231314	0.0260499	0.09973	0.261205	471	125.15	345.85	20	8	11.6155	8.38446	conserved hypothetical protein	0	-
CPIJ016521	Y	X	0.0230956	0.0246291	0.129666	0.189943	213	39.8073	173.193	9	4	4.92773	4.07227	predicted protein	1	F:zinc ion binding	-	PF12937	F-box-like
CPIJ004536	Y	X	0.0230623	0.0274342	0.0925869	0.296307	540	149.753	390.247	23	9	12.9785	10.0215	conserved hypothetical protein	3	C:extracellular region; F:chitin binding; P:chitin metabolic process	-	PF01607	Chitin binding Peritrophin-A domain
CPIJ010086	Y	X	0.0229618	0.0258001	0.0301513	0.855688	576	140.495	435.505	15	10	4.10683	10.8932	microfibril-associated glycoprotein 4	2	P:signal transduction; F:receptor binding	-	PF00147	Fibrinogen beta and gamma chains, C-terminal globular domain
CPIJ004750	Y	X	0.0228232	0.0262735	0.0260321	1.00927	237	61.7396	175.26	6	4	1.55238	4.44762	conserved hypothetical protein	1	F:transferase activity, transferring acyl groups other than amino-acyl groups	EC:2.3.1.0	PF01757	Acyltransferase family
CPIJ014763	Y	X	0.0225916	0.0227964	0.0542275	0.420385	579	136.358	442.642	17	10	7.18926	9.81074	conserved hypothetical protein	2	F:zinc ion binding; C:intracellular	-	PF00569	Zinc finger, ZZ type
CPIJ014553	Y	X	0.0225172	0.0277317	0.023271	1.19169	237	59.3581	177.642	6	4	1.31395	4.68605	salivary long d7 protein 3	1	F:odorant binding	-	PF01395	PBP/GOBP family
CPIJ019284	Y	X	0.0225055	0.0241034	0.0338997	0.71102	192	58.6991	133.301	5	3	1.91229	3.08771	hypothetical protein CpipJ_CPIJ019284	0	-
CPIJ016359	Y	X	0.0222838	0.0221697	0.0243693	0.909739	768	229.493	538.507	17	12	5.42314	11.5769	myo inositol monophosphatase	1	P:phosphatidylinositol phosphorylation	-	PF00459	Inositol monophosphatase family
CPIJ012829	Y	X	0.0222294	0.0258722	0.113711	0.227525	375	105.087	269.913	18	6	11.3608	6.63915	fibrinogen and fibronectin	3	C:extracellular space; P:signal transduction; F:receptor binding	-	PF00147	Fibrinogen beta and gamma chains, C-terminal globular domain
CPIJ007646	Y	X	0.0221662	0.0282259	0.126101	0.223836	294	68.4314	225.569	14	5	8.05605	5.94395	conserved hypothetical protein	0	-
CPIJ015938	Y	X	0.0218815	0.0220776	0.0291451	0.757507	303	74.4961	228.504	7	5	2.1062	4.8938	conserved hypothetical protein	0	-		PF12796	Ankyrin repeats (3 copies)
CPIJ018630	Y	X	0.021635	0.0236667	0.105144	0.225088	549	133.008	415.992	22	9	12.9109	9.08905	a chain structures of an insect epsilon-class glutathione s- transferase from the malaria vector anopheles gambiae: evidence for high ddt-detoxifying activity	1	F:transferase activity	-	PF13417	Glutathione S-transferase, N-terminal domain
CPIJ011378	Y	X	0.0216129	0.0228194	0.129636	0.176026	510	139.851	370.149	25	8	17.0544	7.94557	cationic trypsin	2	F:serine-type endopeptidase activity; P:proteolysis	EC:3.4.21.0	PF00089	Trypsin
CPIJ802486	Y	X	0.0215921	0.0367567	0.0522336	0.703698	237	51.7471	185.253	9	4	2.55739	6.44261	lrr toll	0	-		PF13855	Leucine rich repeat
CPIJ007246	Y	X	0.021591	0.0221842	0.134631	0.164777	486	115.475	370.525	22	8	14.3911	7.60891	heme oxygenase 1	2	P:heme oxidation; F:heme oxygenase (decyclizing) activity	EC:1.14.99.3	PF01126	Heme oxygenase
CPIJ011860	Y	X	0.021449	0.0237527	0.0853705	0.27823	582	115.777	466.223	20	10	9.43214	10.5679	zinc finger protein	3	F:nucleic acid binding; C:intracellular; F:zinc ion binding	-
CPIJ012627	Y	X	0.0214417	0.0275637	0.0331751	0.830855	249	62.4481	186.552	7	4	2.01033	4.98967	fibrinogen and fibronectin	3	C:extracellular space; P:signal transduction; F:receptor binding	-	PF00147	Fibrinogen beta and gamma chains, C-terminal globular domain
CPIJ009967	Y	X	0.0213945	0.0222003	0.0518606	0.428077	246	59.0361	186.964	7	4	2.97152	4.02848	protein	0	-		PF12937	F-box-like
CPIJ013176	Y	X	0.021378	0.0268944	0.061745	0.435572	624	156.23	467.77	21	10	9.11398	11.886	conserved hypothetical protein	1	F:structural constituent of cuticle	-	PF00379	Insect cuticle protein
CPIJ011001	Y	X	0.0213768	0.0222967	0.127095	0.175434	303	69.1018	233.898	13	5	8.15653	4.84347	anopheles gambiae pest agap012648-pa	1	F:sulfotransferase activity	EC:2.8.2.0	PF00685	Sulfotransferase domain
CPIJ007013	Y	X	0.0212154	0.0209696	0.110629	0.189549	231	42.4585	188.542	8	4	4.34378	3.65622	histidine triad nucleotide-binding protein 1	2	F:kinase activity; P:phosphorylation	-	PF01230	HIT domain
CPIJ013538	Y	X	0.0210735	0.0320322	0.193876	0.16522	447	114.83	332.17	29	7	19.622	9.37803	fibrinogen and fibronectin	3	C:extracellular space; P:signal transduction; F:receptor binding	-	PF00147	Fibrinogen beta and gamma chains, C-terminal globular domain
CPIJ011141	Y	X	0.0210374	0.0280177	0.0207965	1.34723	207	64.3974	142.603	4	3	1.00418	2.99582	conserved hypothetical protein	0	-		PF09770	Topoisomerase II-associated protein PAT1
CPIJ005629	Y	X	0.0209707	0.0232388	0.128053	0.181479	315	76.5719	238.428	14	5	8.9452	5.0548	conserved hypothetical protein	4	C:integral to membrane; P:homophilic cell adhesion; F:calcium ion binding; C:plasma membrane	-
CPIJ012592	Y	X	0.020908	0.0185057	0.115887	0.159687	252	60.686	191.314	9	4	5.98636	3.01364	zinc finger protein	3	F:nucleic acid binding; C:nucleus; F:zinc ion binding	-	PF07776	Zinc-finger associated domain (zf-AD)
CPIJ008918	Y	X	0.0209017	0.0241533	0.146947	0.164368	249	57.628	191.372	12	4	7.76279	4.23721	uga suppressor trna-associated antigenic protein	3	P:metabolic process; F:transferase activity, transferring selenium-containing groups; F:pyridoxal phosphate binding	EC:2.9.1.0	PF05889	Soluble liver antigen/liver pancreas antigen (SLA/LP autoantigen)
CPIJ019059	Y	X	0.0207462	0.039121	0.134718	0.290392	423	85.5887	337.411	23	7	10.7236	12.2764	cuticular protein	0	-
CPIJ015014	Y	X	0.0206569	0.0198134	0.0926067	0.213952	267	73.3599	193.64	10	4	6.39081	3.60919	angiopoietin 2	3	C:extracellular space; P:signal transduction; F:receptor binding	-	PF00147	Fibrinogen beta and gamma chains, C-terminal globular domain
CPIJ019592	Y	X	0.0206002	0.0224262	0.0643676	0.348408	606	169.112	436.888	20	9	10.5258	9.47416	solute carrier family 2	3	F:substrate-specific transmembrane transporter activity; C:integral to membrane; P:transmembrane transport	-	PF00083	Sugar (and other) transporter
CPIJ012061	Y	X	0.0205983	0.0237617	0.0278364	0.853621	330	87.2609	242.739	8	5	2.37067	5.62933	secreted salivary gland protein	0	-
CPIJ006342	Y	X	0.0205919	0.0217368	0.0632596	0.343613	690	155.81	534.19	20	11	9.18246	10.8175	conserved hypothetical protein	4	F:zinc ion binding; F:nucleic acid binding; C:intracellular; F:nucleotide binding	-	PF14259	RNA recognition motif (a.k.a. RRM, RBD, or RNP domain)
CPIJ003622	Y	X	0.0204411	0.0227412	0.0504149	0.451081	1149	366.265	782.735	35	16	17.8208	17.1792	serine protease	2	F:serine-type endopeptidase activity; P:proteolysis	EC:3.4.21.0	PF00089	Trypsin
CPIJ016317	Y	X	0.0204372	0.0263992	0.180414	0.146325	195	48.2086	146.791	11	3	7.60956	3.39044	conserved hypothetical protein	1	F:structural constituent of cuticle	-	PF00379	Insect cuticle protein
CPIJ019183	Y	X	0.0204029	0.0225591	0.044453	0.507481	1152	318.785	833.215	32	17	13.7551	18.2449	aael003737- partial	0	-		PF12796	Ankyrin repeats (3 copies)
CPIJ006902	Y	X	0.0203061	0.0212683	0.00932878	2.27986	294	97.0153	196.985	5	4	0.888234	4.11177	adult cuticle protein	1	F:structural constituent of cuticle	-
CPIJ011265	Y	X	0.020235	0.0256921	0.101913	0.252098	444	98.0649	345.935	18	7	9.52731	8.47269	conserved hypothetical protein	0	-
CPIJ008109	Y	X	0.0202263	0.0267598	0.196039	0.136503	279	81.238	197.762	18	4	13.5105	4.48948	conserved hypothetical protein	1	F:transferase activity, transferring acyl groups other than amino-acyl groups	EC:2.3.1.0	PF01757	Acyltransferase family
CPIJ002757	Y	X	0.0201976	0.020533	0.0516258	0.397728	990	247.337	742.663	27	15	12.305	14.695	cellular tumor antigen p53	5	F:transcription regulatory region DNA binding; P:apoptotic process; P:regulation of transcription, DNA-dependent; F:sequence-specific DNA binding transcription factor activity; C:nucleus	-	PF00870	P53 DNA-binding domain
CPIJ010502	Y	X	0.0201783	0.0199304	0.105906	0.18819	333	85.2095	247.791	13	5	8.40195	4.59805	g-box-binding factor	3	C:extracellular region; F:chitin binding; P:chitin metabolic process	-	PF01607	Chitin binding Peritrophin-A domain
CPIJ801576	Y	X	0.0201576	0.0205146	0.0811274	0.252869	528	131.127	396.873	18	8	10.1963	7.80367	biotin protein ligase	2	P:cellular protein modification process; F:biotin-[acetyl-CoA-carboxylase] ligase activity	EC:6.3.4.15	PF03099	Biotin/lipoate A/B protein ligase family
CPIJ015517	Y	X	0.0201147	0.0213638	0.129011	0.165596	363	64.7098	298.29	14	6	7.93947	6.06053	conserved hypothetical protein	0	-
CPIJ020281	Y	X	0.0199994	0.0216718	0.191851	0.112962	297	46.9915	250.008	13	5	8.11999	4.88001	serine protease	2	F:serine-type endopeptidase activity; P:proteolysis	EC:3.4.21.0	PF00089	Trypsin
CPIJ008235	Y	X	0.0199004	0.0247144	0.261346	0.094566	909	155.245	753.755	54	15	37.008	16.992	conserved hypothetical protein	0	-
CPIJ016906	Y	X	0.0198543	0.0214507	0.051531	0.416268	1116	310.131	805.869	32	16	15.3723	16.6277	conserved hypothetical protein	0	-		PF04180	Low temperature viability protein
CPIJ010496	Y	X	0.0198302	0.0217228	0.0761333	0.285326	519	115.574	403.426	17	8	8.51719	8.48281	plasminogen	2	F:serine-type endopeptidase activity; P:proteolysis	EC:3.4.21.0	PF00089	Trypsin
CPIJ014756	Y	X	0.0196847	0.0204451	0.0721523	0.28336	321	66.9953	254.005	10	5	4.82084	5.17916	conserved hypothetical protein	2	F:zinc ion binding; F:metal ion binding	-	PF00856	SET domain
CPIJ020311	Y	X	0.0196508	0.0203703	0.000407406	50	339	84.5577	254.442	5	5	0.0330131	4.96699	mitochondrial dna polymerase accessory subunit	7	C:integral to membrane; P:glycyl-tRNA aminoacylation; P:cholesterol transport; F:ATP binding; F:hedgehog receptor activity; C:cytoplasm; F:glycine-tRNA ligase activity	EC:6.1.1.14	PF03129	Anticodon binding domain
CPIJ004556	Y	X	0.0195916	0.025652	0.0481436	0.532824	867	203.451	663.549	26	13	9.4967	16.5033	conserved hypothetical protein	3	F:zinc ion binding; C:intracellular; F:metal ion binding	-	PF00569	Zinc finger, ZZ type
CPIJ013342	Y	X	0.0195067	0.0201572	0.000403145	50	261	55.9424	205.058	4	4	0.0217066	3.97829	bel12_ag transposon polyprotein	0	-		PF05585	Putative peptidase (DUF1758)
CPIJ019900	Y	X	0.0194437	0.0196356	0.13362	0.146951	264	58.278	205.722	11	4	7.24285	3.75715	myo inositol monophosphatase	1	P:phosphatidylinositol phosphorylation	-	PF00459	Inositol monophosphatase family
CPIJ004596	Y	X	0.019415	0.0225113	0.0831207	0.270827	1377	346.868	1030.13	49	20	27.1573	21.8427	conserved hypothetical protein	3	P:RNA methylation; F:RNA methyltransferase activity; F:O-methyltransferase activity
CPIJ018184	Y	X	0.0193875	0.0204467	0.292817	0.0698278	243	36.6813	206.319	13	4	9.33402	3.66598	conserved hypothetical protein	3	C:intracellular; P:transport; F:transporter activity	-	PF03765	CRAL/TRIO, N-terminal domain
CPIJ018830	Y	X	0.0193561	0.0212315	0.0628472	0.337827	201	46.0097	154.99	6	3	2.80634	3.19366	craniofacial development protein 1	0	-		PF07572	Bucentaur or craniofacial development
CPIJ015486	Y	X	0.0193403	0.0206912	0.0891844	0.232005	369	110.472	258.528	14	5	9.07359	4.92641	ppargamma constitutive coactivator 1	0	-
CPIJ002754	Y	X	0.0192882	0.0211093	0.0942381	0.224	849	226.857	622.143	33	12	20.4422	12.5578	serine protease	2	F:serine-type endopeptidase activity; P:proteolysis	EC:3.4.21.0	PF00089	Trypsin
CPIJ801634	Y	X	0.0192563	0.0215427	0.171913	0.125312	675	103.758	571.242	28	11	16.569	11.431	f-box lrr-repeat protein 4	0	-		PF12937	F-box-like
CPIJ017862	Y	X	0.0191344	0.0195062	0.166637	0.117058	591	120.642	470.358	27	9	18.539	8.46097	anopheles gambiae pest agap012648-pa	1	F:sulfotransferase activity	EC:2.8.2.0	PF00685	Sulfotransferase domain
CPIJ006473	Y	X	0.0191317	0.0200954	0.0693885	0.289607	1029	297.232	731.768	33	14	19.2645	13.7355	conserved hypothetical protein	3	P:ribosome biogenesis; F:snoRNA binding; P:snRNA pseudouridine synthesis	-	PF04410	Gar1/Naf1 RNA binding region
CPIJ016491	Y	X	0.0190751	0.0207531	0.0904876	0.229347	546	126.604	419.396	19	8	10.797	8.20302	4-coumarate- ligase 1	2	F:ligase activity; P:metabolic process	-	PF13193	Domain of unknown function (DUF4009)
CPIJ001030	Y	X	0.0190655	0.0193243	0.0858671	0.22505	261	51.1973	209.803	8	4	4.16182	3.83818	zinc finger protein 235	3	F:zinc ion binding; F:nucleic acid binding; C:intracellular	-	PF13465	Zinc-finger double domain
CPIJ014659	Y	X	0.0190522	0.0219059	0.0884778	0.247586	516	96.1022	419.898	17	8	8.16611	8.83389	conserved hypothetical protein	1	P:response to metal ion	-	PF03091	CutA1 divalent ion tolerance protein
CPIJ015490	Y	X	0.0190227	0.0200661	0.0242601	0.827122	327	116.725	210.275	7	4	2.81122	4.18878	hypothetical protein CpipJ_CPIJ015490	0	-
CPIJ009341	Y	X	0.0188899	0.0205518	0.0475247	0.432445	222	63.1851	158.815	6	3	2.87502	3.12498	conserved hypothetical protein	0	-
CPIJ802247	Y	X	0.0188002	0.0232269	0.0756952	0.306848	210	50.427	159.573	7	3	3.5515	3.4485	juvenile hormone-inducible protein	1	F:transferase activity, transferring phosphorus-containing groups	-	PF02958	Ecdysteroid kinase
CPIJ019738	Y	X	0.0187824	0.0224899	0.0276345	0.813834	216	56.2763	159.724	5	3	1.51065	3.48935	conserved hypothetical protein	0	-		PF12248	Farnesoic acid 0-methyl transferase
CPIJ011863	Y	X	0.0187396	0.0197543	0.123995	0.159316	891	143.918	747.082	30	14	16.4203	13.5797	zinc finger protein	3	F:zinc ion binding; F:nucleic acid binding; C:intracellular	-	PF13912	C2H2-type zinc finger
CPIJ000508	Y	X	0.0187052	0.0265089	0.0185782	1.42688	210	49.6168	160.383	5	3	0.890899	4.1091	hypothetical protein CpipJ_CPIJ000508	0	-
CPIJ019274	Y	X	0.0186814	0.0168454	0.0356618	0.472365	618	243.295	374.705	14	7	8.10419	5.89581	microfibril-associated glycoprotein 4	2	P:signal transduction; F:receptor binding	-	PF00147	Fibrinogen beta and gamma chains, C-terminal globular domain
CPIJ002168	Y	X	0.0186708	0.0191041	0.037264	0.512668	354	86.202	267.798	8	5	3.08562	4.91438	conserved hypothetical protein	0	-
CPIJ014442	Y	X	0.0186594	0.0220976	0.0113065	1.95441	414	92.446	321.554	8	6	1.0259	6.9741	tetratricopeptide repeat tpr	2	F:zinc ion binding; F:nucleic acid binding	-
CPIJ020109	Y	X	0.018506	0.0195212	0.0479785	0.406874	579	146.707	432.293	15	8	6.82154	8.17846	serine protease	2	F:serine-type endopeptidase activity; P:proteolysis	EC:3.4.21.0	PF00089	Trypsin
CPIJ801769	Y	X	0.0184025	0.0216008	0.0792911	0.272424	897	190.574	706.426	30	13	14.9266	15.0734	transport and golgi organization 6	0	-		PF10304	Domain of unknown function (DUF2411)
CPIJ019551	Y	X	0.018386	0.0216773	0.0442951	0.489385	549	113.887	435.113	14	8	4.87851	9.12149	ion channel nompc	1	P:signal transduction		PF12796	Ankyrin repeats (3 copies)
CPIJ012565	Y	X	0.0183537	0.0245461	0.0659144	0.372393	261	43.0598	217.94	8	4	2.77315	5.22685	phosphatidate phosphatase	3	C:membrane; P:metabolic process; F:hydrolase activity	-	PF01569	PAP2 superfamily
CPIJ015104	Y	X	0.018278	0.0223324	0.166282	0.134304	435	106.736	328.264	23	6	16.2769	6.72314	anionic trypsin-2	2	F:serine-type endopeptidase activity; P:proteolysis	EC:3.4.21.0	PF00089	Trypsin
CPIJ003247	Y	X	0.0182294	0.0190367	0.077745	0.244861	405	75.8612	329.139	12	6	5.81852	6.18148	conserved hypothetical protein	2	F:zinc ion binding; C:nucleus	-	PF04500	FLYWCH zinc finger domain
CPIJ017875	Y	X	0.0181099	0.0180508	0.000361016	50	228	62.3445	165.655	3	3	0.0224123	2.97759	hypothetical protein CpipJ_CPIJ017875	0	-
CPIJ012620	Y	X	0.0180764	0.0182949	0.178553	0.102462	348	71.3973	276.603	17	5	12.1694	4.83065	methyltransferase 10 domain containing	2	F:methyltransferase activity; P:methylation	EC:2.1.1.0	PF05971	Protein of unknown function (DUF890)
CPIJ005673	Y	X	0.0180429	0.0176657	0.124404	0.142002	387	109.883	277.117	16	5	11.781	4.21901	neurexin domain-containing protein	0	-
CPIJ003794	Y	X	0.0179861	0.021665	0.085419	0.253632	501	111.81	389.19	17	7	9.02888	7.97112	roadkill e	0	-		PF00651	BTB/POZ domain
CPIJ018269	Y	X	0.0179132	0.0188946	0.105589	0.178945	261	37.7015	223.299	8	4	3.88377	4.11623	tyrosine-protein kinase	5	P:protein phosphorylation; F:ATP binding; P:ephrin receptor signaling pathway; F:ephrin receptor activity; C:integral to plasma membrane	-	PF07679	Immunoglobulin I-set domain
CPIJ014183	Y	X	0.0179076	0.0177996	0.0211921	0.839919	384	104.789	279.211	7	5	2.16186	4.83814	conserved hypothetical protein	3	C:extracellular region; F:chitin binding; P:chitin metabolic process	-	PF01607	Chitin binding Peritrophin-A domain
CPIJ018132	Y	X	0.017889	0.0181734	0.000363468	50	201	33.2991	167.701	3	3	0.0118666	2.98813	predicted protein	0	-		PF00057	Low-density lipoprotein receptor domain class A
CPIJ014740	Y	X	0.0178824	0.0226073	0.0427162	0.529244	1092	253.185	838.815	29	15	10.5324	18.4676	conserved hypothetical protein	1	F:DNA binding	-	PF03184	DDE superfamily endonuclease
CPIJ000901	Y	X	0.0178148	0.0292656	0.0832973	0.351339	285	60.468	224.532	11	4	4.77306	6.22694	aael014623- partial	0	-
CPIJ012344	Y	X	0.0178051	0.0226627	0.0313897	0.721977	411	130.181	280.819	10	5	3.91022	6.08978	conserved hypothetical protein	0	-
CPIJ014656	Y	X	0.0177941	0.0207207	0.0791021	0.261949	585	135.412	449.588	19	8	10.162	8.838	coagulation factor xii	2	F:serine-type endopeptidase activity; P:proteolysis	EC:3.4.21.0	PF00089	Trypsin
CPIJ019441	Y	X	0.0177358	0.0181601	0.0235822	0.770078	468	129.702	338.298	9	6	2.99145	6.00855	conserved hypothetical protein	0	-
CPIJ800069	Y	X	0.0177301	0.0174926	0.0322026	0.543204	444	105.592	338.408	9	6	3.2836	5.7164	kda salivary peptide	0	-
CPIJ000839	Y	X	0.0177299	0.0181959	0.0947167	0.192109	204	34.7941	169.206	6	3	3.102	2.898	tyrosine phosphatase	0	-
CPIJ006805	Y	X	0.0177167	0.0192244	0.0807055	0.238204	423	84.3363	338.664	13	6	6.64438	6.35562	salivary c-type lectin	1	F:carbohydrate binding	-	PF00059	Lectin C-type domain
CPIJ015668	Y	X	0.0177104	0.0188296	0.206935	0.0909924	216	46.608	169.392	11	3	8.26631	2.73369	amp dependent ligase	2	P:metabolic process; F:catalytic activity	-	PF00501	AMP-binding enzyme
CPIJ000920	Y	X	0.0176651	0.0208502	0.0981873	0.212352	456	116.348	339.652	17	6	10.4944	6.50561	conserved hypothetical protein	3	P:protein N-linked glycosylation; F:beta-1,4-mannosylglycoprotein 4-beta-N-acetylglucosaminyltransferase activity; C:membrane
CPIJ012578	Y	X	0.0176631	0.0198687	0.0493459	0.402642	324	97.5389	226.461	9	4	4.65156	4.34844	conserved hypothetical protein	0	-
CPIJ016643	Y	X	0.017657	0.018677	0.0680283	0.274547	201	31.0962	169.904	5	3	1.99994	3.00006	cysteine-rich venom protein	0	-		PF01826	Trypsin Inhibitor like cysteine rich domain
CPIJ016429	Y	X	0.0176129	0.018512	0.0384604	0.481327	3702	919.955	2782.05	85	49	34.6149	50.3851	ion channel nompc	0	-
CPIJ008410	Y	X	0.0175675	0.0220807	0.0767292	0.287775	669	156.691	512.309	22	9	11.335	10.665	aminopeptidase n	3	F:metalloendopeptidase activity; P:proteolysis; F:zinc ion binding	EC:3.4.24.0	PF11838	Domain of unknown function (DUF3358)
CPIJ006818	Y	X	0.0174561	0.0183248	0.0980706	0.186853	294	64.8539	229.146	10	4	6.02337	3.97663	salivary c-type lectin	1	F:carbohydrate binding	-	PF00059	Lectin C-type domain
CPIJ014551	Y	X	0.0174451	0.0214593	0.159848	0.134248	597	138.418	458.582	29	8	20.0725	8.92752	long form d7 salivary protein	1	F:odorant binding	-	PF01395	PBP/GOBP family
CPIJ010297	Y	X	0.0174208	0.0187955	0.0497047	0.378144	573	113.779	459.221	14	8	5.54186	8.45814	coagulation factor vii	2	F:serine-type endopeptidase activity; P:proteolysis	EC:3.4.21.0	PF00089	Trypsin
CPIJ013290	Y	X	0.0173073	0.0201293	0.121978	0.165024	519	114.547	404.453	21	7	13.2686	7.73141	fibrinogen and fibronectin	3	C:extracellular space; P:signal transduction; F:receptor binding	-	PF00147	Fibrinogen beta and gamma chains, C-terminal globular domain
CPIJ013025	Y	X	0.0173072	0.0186489	0.0212079	0.879338	477	130.323	346.677	9	6	2.6953	6.3047	salivary secreted angiopoietin	2	P:signal transduction; F:receptor binding	-	PF00147	Fibrinogen beta and gamma chains, C-terminal globular domain
CPIJ014495	Y	X	0.017307	0.0216286	0.106439	0.203203	1032	280.858	751.142	43	13	27.8595	15.1405	transient receptor potential cation channel protein painless	6	C:integral to membrane; C:membrane; P:transmembrane transport; P:ion transport; F:ion channel activity; P:transport
CPIJ019278	Y	X	0.0172778	0.0192566	0.0228232	0.84373	513	107.856	405.144	10	7	2.39846	7.60154	netrin receptor	2	P:signal transduction; F:receptor binding	-	PF00147	Fibrinogen beta and gamma chains, C-terminal globular domain
CPIJ014250	Y	X	0.0172746	0.0172757	0.0920411	0.187696	444	96.669	347.331	14	6	8.36125	5.63875	conserved hypothetical protein	2	C:intracellular; F:DNA binding
CPIJ012666	Y	X	0.0172491	0.0212892	0.0630766	0.337514	285	53.1043	231.896	8	4	3.23382	4.76618	salivary cys-rich secreted peptide	0	-
CPIJ802178	Y	X	0.0171815	0.0174569	0.124991	0.139665	333	100.191	232.809	14	4	10.5698	3.43023	regulator of sex-limitation	3	F:zinc ion binding; F:nucleic acid binding; C:intracellular	-	PF13465	Zinc-finger double domain
CPIJ010620	Y	X	0.0171524	0.0177327	0.0346087	0.512375	234	59.0969	174.903	5	3	1.98695	3.01305	conserved hypothetical protein	4	F:flavin adenine dinucleotide binding; F:oxidoreductase activity, acting on paired donors, with incorporation or reduction of molecular oxygen, NADH or NADPH as one donor, and incorporation of one atom of oxygen; P:ubiquinone biosynthetic process; P:oxidation-reduction process	EC:1.14.13.0	PF01494	FAD binding domain
CPIJ002681	Y	X	0.0170677	0.0173899	0.0176704	0.984123	645	117.687	527.313	11	9	2.03345	8.96655	glutathione s-transferase	1	F:glutathione transferase activity	EC:2.5.1.18	PF00043	Glutathione S-transferase, C-terminal domain
CPIJ017503	Y	X	0.0170569	0.0176205	0.00035241	50	234	58.1178	175.882	3	3	0.019696	2.9803	tyrosine sulfotransferase	4	P:transmembrane transport; F:protein-tyrosine sulfotransferase activity; C:integral to membrane; P:peptidyl-tyrosine sulfation	EC:2.8.2.20	PF13469	Sulfotransferase family
CPIJ013047	Y	X	0.01697	0.0191289	0.0435486	0.439253	447	93.4353	353.565	10	6	3.75635	6.24365	keratinocyte lectin	1	F:carbohydrate binding	-	PF00337	Galactoside-binding lectin
CPIJ008181	Y	X	0.016965	0.0170042	0.150524	0.112967	444	90.3303	353.67	18	6	12.4801	5.51991	inosine-uridine preferring nucleoside hydrolase	1	F:hydrolase activity	-	PF01156	Inosine-uridine preferring nucleoside hydrolase
CPIJ000868	Y	X	0.0169059	0.0124129	0.0935446	0.132695	396	100.245	295.755	12	5	8.62384	3.37616	fibrinogen and fibronectin	3	C:extracellular space; P:signal transduction; F:receptor binding	-	PF00147	Fibrinogen beta and gamma chains, C-terminal globular domain
CPIJ000802	Y	X	0.0168768	0.0167863	0.0814158	0.20618	276	38.9878	237.012	7	4	3.10643	3.89357	aael014395- partial	3	C:membrane; F:phosphotransferase activity, for other substituted phosphate groups; P:phospholipid biosynthetic process	EC:2.7.8.0
CPIJ802109	Y	X	0.0168659	0.0194051	0.0868528	0.223425	360	63.5428	296.457	11	5	5.38586	5.61414	conserved hypothetical protein	0	-
CPIJ802021	Y	X	0.0167372	0.0212633	0.0963445	0.220701	225	45.7592	179.241	8	3	4.2907	3.7093	aael006672- partial	1	F:transferase activity, transferring acyl groups other than amino-acyl groups	EC:2.3.1.0	PF08445	FR47-like protein
CPIJ014785	Y	X	0.0167333	0.0204086	0.0910578	0.224128	744	146.388	597.612	25	10	13.055	11.945	mitochondrial ribosomal l46	2	C:ribosome; F:hydrolase activity	-	PF11788	39S mitochondrial ribosomal protein L46
CPIJ003066	Y	X	0.0167069	0.0217174	0.0698409	0.310956	429	69.8681	359.132	12	6	4.6183	7.3817	conserved hypothetical protein	4	P:regulation of Rab GTPase activity; P:positive regulation of Rab GTPase activity; C:intracellular; F:Rab GTPase activator activity
CPIJ011888	Y	X	0.0166908	0.0119773	0.0565436	0.211824	234	54.2601	179.74	5	3	2.93827	2.06173	carbamoyl-phosphate synthase large chain	4	P:cellular amino acid metabolic process; F:aspartate carbamoyltransferase activity; P:'de novo' pyrimidine nucleobase biosynthetic process; F:amino acid binding	EC:2.1.3.2	PF02729	Aspartate/ornithine carbamoyltransferase, carbamoyl-P binding domain
CPIJ003921	Y	X	0.0166718	0.0175226	0.0662737	0.264397	546	126.13	419.87	15	7	7.97812	7.02188	nacht and ankyrin domain protein	2	P:nucleoside metabolic process; F:catalytic activity		PF00023	Ankyrin repeat
CPIJ002646	Y	X	0.0166223	0.0181089	0.0394803	0.458682	396	95.2001	300.8	9	5	3.67455	5.32545	30 kda salivary gland allergen aed a 3	0	-
CPIJ003965	Y	X	0.0165909	0.0168628	0.166617	0.101207	228	47.1777	180.822	10	3	7.2051	2.7949	conserved hypothetical protein	3	C:extracellular region; F:chitin binding; P:chitin metabolic process	-	PF01607	Chitin binding Peritrophin-A domain
CPIJ002921	Y	X	0.016547	0.0254949	0.167138	0.152538	900	174.794	725.206	45	12	27.5588	17.4412	aael011548- partial	2	P:mitotic chromosome condensation; C:nuclear condensin complex		PF12717	non-SMC mitotic condensation complex subunit 1
CPIJ801838	Y	X	0.0165156	0.0175403	0.0812218	0.215956	1407	377.669	1029.33	46	17	28.9566	17.0434	conserved hypothetical protein	0	-
CPIJ012590	Y	X	0.0164488	0.017982	0.0314436	0.571881	573	147.436	425.564	12	7	4.52712	7.47288	zinc finger protein 761	2	C:intracellular; F:zinc ion binding	-	PF13912	C2H2-type zinc finger
CPIJ801902	Y	X	0.0164339	0.0172128	0.257051	0.0669623	216	33.4499	182.55	9	3	6.59128	2.40872	homeobox protein ceh-19	4	F:sequence-specific DNA binding transcription factor activity; F:sequence-specific DNA binding; C:nucleus; P:regulation of transcription, DNA-dependent	-	PF00046	Homeobox domain
CPIJ012060	Y	X	0.0164059	0.0176488	0.0568977	0.310185	870	260.462	609.538	24	10	13.9058	10.0942	secreted salivary gland protein	0	-
CPIJ013872	Y	X	0.0163931	0.0176795	0.0515899	0.342694	687	198.99	488.01	18	8	9.78031	8.21969	aael005882- partial	0	-
CPIJ013540	Y	X	0.0163542	0.0293816	0.0920668	0.319133	276	31.4142	244.586	10	4	2.86967	7.13033	hypothetical protein CpipJ_CPIJ013540	0	-
CPIJ004127	Y	X	0.016339	0.0181994	0.142719	0.12752	561	132.576	428.424	25	7	17.7043	7.29566	macroglobulin complement	3	C:extracellular space; F:endopeptidase inhibitor activity; P:negative regulation of endopeptidase activity	-	PF07677	A-macroglobulin receptor
CPIJ802459	Y	X	0.0162874	0.0202712	0.093222	0.217451	468	99.6177	368.382	16	6	8.86856	7.13144	gchain caspase-3 in complex with an inhibitory darpin-	0	-		PF12796	Ankyrin repeats (3 copies)
CPIJ000563	Y	X	0.0162589	0.0189613	0.0951574	0.199263	690	136.458	553.542	22	9	12.166	9.83395	conserved hypothetical protein	1	F:N-acetyltransferase activity	-	PF00583	Acetyltransferase (GNAT) family
CPIJ018153	Y	X	0.0162286	0.0194269	0.0963215	0.201688	237	52.1407	184.859	8	3	4.66455	3.33545	conserved hypothetical protein	3	C:integral to membrane; F:acetyl-CoA transporter activity; P:acetyl-CoA transport	-
CPIJ802231	Y	X	0.0162069	0.0211286	0.0427789	0.493902	318	71.1922	246.808	8	4	2.94958	5.05042	b-type allatostatin prohormone	0	-
CPIJ008557	Y	X	0.0161187	0.0191677	0.0767763	0.249656	582	147.723	434.277	19	7	10.9577	8.04231	conserved hypothetical protein	3	C:extracellular region; F:chitin binding; P:chitin metabolic process	-	PF01607	Chitin binding Peritrophin-A domain
CPIJ005630	Y	X	0.0160888	0.0182223	0.0848139	0.21485	2646	719.195	1926.81	91	31	57.7555	33.2445	conserved hypothetical protein	4	C:integral to membrane; P:homophilic cell adhesion; F:calcium ion binding; C:plasma membrane	-
CPIJ006517	Y	X	0.0160689	0.017477	0.0570415	0.306391	375	126.072	248.928	11	4	6.85373	4.14627	hypothetical protein CpipJ_CPIJ006517	0	-
CPIJ011496	Y	X	0.0160383	0.0177719	0.0490622	0.362231	327	77.5968	249.403	8	4	3.69644	4.30356	hypothetical protein CpipJ_CPIJ011496	0	-
CPIJ018736	Y	X	0.0160142	0.0166399	0.219208	0.0759094	246	58.6665	187.334	14	3	11.2686	2.73143	d7 protein	1	F:odorant binding	-	PF01395	PBP/GOBP family
CPIJ001111	Y	X	0.0159564	0.0236775	0.170559	0.138822	813	186.291	626.709	43	10	29.3111	13.6889	serine protease 27	3	C:integral to membrane; P:proteolysis; F:serine-type endopeptidase activity	EC:3.4.21.0	PF00089	Trypsin
CPIJ015565	Y	X	0.0159374	0.0178263	0.011246	1.58512	255	66.7644	188.236	4	3	0.731382	3.26862	conserved hypothetical protein	1	F:zinc ion binding	-	PF01753	MYND finger
CPIJ014666	Y	X	0.0158787	0.0168147	0.0660967	0.254395	483	105.136	377.864	13	6	6.79097	6.20903	hypothetical protein CpipJ_CPIJ014666	0	-
CPIJ801563	Y	X	0.0157997	0.021429	0.0889368	0.240947	417	100.538	316.462	15	5	8.53035	6.46965	trypsin 7	2	F:serine-type endopeptidase activity; P:proteolysis	EC:3.4.21.0	PF00089	Trypsin
CPIJ017776	Y	X	0.0157997	0.0162791	0.0087533	1.85977	1098	338.49	759.51	15	12	2.89968	12.1003	ubiquitin conjugating enzyme 7 interacting protein	1	F:calcium ion binding	-
CPIJ002592	Y	X	0.0157845	0.0169475	0.0281082	0.602938	993	232.76	760.24	19	12	6.39878	12.6012	ankyrin repeat and socs box protein 13	0	-		PF00023	Ankyrin repeat
CPIJ004640	Y	X	0.0157595	0.0161735	0.0816445	0.198096	750	178.916	571.084	23	9	14.0905	8.9095	trypsin 5g1	2	F:serine-type endopeptidase activity; P:proteolysis	EC:3.4.21.0	PF00089	Trypsin
CPIJ014182	Y	X	0.0157416	0.0155451	0.0368838	0.421462	249	58.422	190.578	5	3	2.1054	2.8946	conserved hypothetical protein	3	C:extracellular region; F:chitin binding; P:chitin metabolic process	-	PF01607	Chitin binding Peritrophin-A domain
CPIJ001276	Y	X	0.0157358	0.0173769	0.303887	0.0571821	162	34.9009	127.099	11	2	9.10415	1.89585	defc_aedae ame: full=defensin-c flags: precursor	3	C:extracellular region; P:innate immune response; P:defense response to bacterium	-	PF01097	Arthropod defensin
CPIJ017432	Y	X	0.0156855	0.0160792	0.0426182	0.377285	243	51.7398	191.26	5	3	2.08798	2.91202	odorant-binding protein 56a	1	F:odorant binding	-	PF01395	PBP/GOBP family
CPIJ800103	Y	X	0.015677	0.0172905	0.0538337	0.321184	264	72.6371	191.363	7	3	3.79165	3.20835	long form d7clu2 salivary protein	2	F:odorant binding; C:extracellular region		PF01395	PBP/GOBP family
CPIJ010891	Y	X	0.0156316	0.0158608	0.0545362	0.29083	729	153.244	575.756	17	9	8.12355	8.87645	conserved hypothetical protein	1	P:signal transduction	-	PF00531	Death domain
CPIJ801398	Y	X	0.0156139	0.0161449	0.194562	0.0829807	258	65.8628	192.137	14	3	11.2715	2.72853	radial spoke head 1-like protein	0	-		PF02493	MORN repeat
CPIJ018144	Y	X	0.0155942	0.0165292	0.1404	0.11773	582	133.116	448.884	24	7	17.1797	6.82031	zinc finger protein 358	3	F:nucleic acid binding; C:nucleus; F:zinc ion binding	-	PF13465	Zinc-finger double domain
CPIJ018858	Y	X	0.0155864	0.0194221	0.0763683	0.254321	252	59.5252	192.475	8	3	4.38994	3.61006	fibrinogen and fibronectin	4	F:ATP binding; P:signal transduction; F:receptor binding; P:tRNA processing	-	PF00147	Fibrinogen beta and gamma chains, C-terminal globular domain
CPIJ003749	Y	X	0.0155379	0.0170937	0.072803	0.234794	234	40.9241	193.076	6	3	2.84666	3.15334	trna delta -isopentenylpyrophosphate transferase	5	C:intracellular; F:ATP binding; F:transferase activity; F:zinc ion binding; P:tRNA processing	-	PF01715	IPP transferase
CPIJ007756	Y	X	0.015444	0.015024	0.109495	0.137212	240	45.7504	194.25	7	3	4.42315	2.57685	muscle isoform d	3	F:DNA binding; C:nucleus; P:regulation of transcription, DNA-dependent	-	PF02671	Paired amphipathic helix repeat
CPIJ801729	Y	X	0.0154384	0.0179693	0.0699622	0.256843	408	84.1317	323.868	11	5	5.53118	5.46882	protein	1	F:odorant binding	-	PF01395	PBP/GOBP family
CPIJ003759	Y	X	0.0154129	0.0176443	0.0524178	0.336609	849	200.191	648.809	21	10	10.0433	10.9567	serine protease inhibitor	3	F:serine-type endopeptidase inhibitor activity; P:proteolysis; F:peptidase activity	-	PF00079	Serpin (serine protease inhibitor)
CPIJ017763	Y	X	0.0154116	0.018054	0.0722777	0.249787	696	176.912	519.088	21	8	12.1183	8.88168	juvenile hormone esterase	1	F:hydrolase activity	-	PF00135	Carboxylesterase family
CPIJ800155	Y	X	0.0154112	0.0156878	0.199901	0.0784778	252	57.3372	194.663	13	3	10.265	2.73497	cytochrome p450	6	F:heme binding; F:oxidoreductase activity, acting on paired donors, with incorporation or reduction of molecular oxygen; F:monooxygenase activity; F:iron ion binding; F:electron carrier activity; P:oxidation-reduction process	-	PF00067	Cytochrome P450
CPIJ016411	Y	X	0.0153789	0.0146601	0.0988811	0.14826	714	128.782	585.218	20	9	11.9494	8.05062	aael015541- partial	1	F:transferase activity, transferring alkyl or aryl (other than methyl) groups	EC:2.5.1.0
CPIJ012603	Y	X	0.0153779	0.0151971	0.0173941	0.873696	258	62.9145	195.085	4	3	1.07841	2.92159	znf235 protein	3	C:intracellular; F:DNA binding; F:zinc ion binding	-
CPIJ001874	Y	X	0.0153424	0.0185712	0.462897	0.0401195	354	28.1063	325.894	15	5	10.2376	4.7624	odorant-binding protein 56a	1	F:odorant binding	-	PF01395	PBP/GOBP family
CPIJ007368	Y	X	0.0153279	0.0172617	0.184942	0.0933355	354	93.0381	260.962	20	4	15.8504	4.14958	zinc finger protein 43 (zinc finger protein 39) (zinc protein htf6) (zinc finger protein kox27)	3	F:nucleic acid binding; C:nucleus; F:zinc ion binding	-	PF13465	Zinc-finger double domain
CPIJ017491	Y	X	0.0152408	0.0174772	0.0827342	0.211246	345	82.5465	262.453	11	4	6.58033	4.41967	glucose dehydrogenase	11	P:alcohol metabolic process; F:flavin adenine dinucleotide binding; C:intracellular; F:calcium-dependent cysteine-type endopeptidase activity; P:cellular metabolic process; F:UDP-glucose 4-epimerase activity; F:calcium ion binding; P:galactose metabolic process; P:proteolysis; F:choline dehydrogenase activity; P:oxidation-reduction process	EC:5.1.3.2; EC:1.1.99.1	PF00732	GMC oxidoreductase
CPIJ006801	Y	X	0.015237	0.0165213	0.0556552	0.296851	513	119.222	393.778	13	6	6.56411	6.43589	salivary c-type lectin	1	F:carbohydrate binding	-	PF00059	Lectin C-type domain
CPIJ013318	Y	X	0.0152208	0.0156352	0.0362869	0.430879	255	57.9012	197.099	5	3	2.02697	2.97303	zinc metalloproteinase nas-4	4	F:metal ion binding; F:metalloendopeptidase activity; P:proteolysis; F:zinc ion binding	EC:3.4.24.0	PF01400	Astacin (Peptidase family M12A)
CPIJ013186	Y	X	0.0152158	0.017262	0.0241162	0.715785	270	72.8363	197.164	5	3	1.70208	3.29792	trypsin 5g1	2	F:serine-type endopeptidase activity; P:proteolysis	EC:3.4.21.0	PF00089	Trypsin
CPIJ012254	Y	X	0.0151819	0.0158218	0.130981	0.120794	522	126.793	395.207	21	6	15.256	5.74403	conserved hypothetical protein	0	-
CPIJ019952	Y	X	0.0151299	0.0166263	0.169948	0.0978314	330	65.6223	264.378	14	4	10.042	3.95797	serine protease	2	P:proteolysis; F:serine-type endopeptidase activity	EC:3.4.21.0	PF00089	Trypsin
CPIJ009142	Y	X	0.0150718	0.019082	0.0748904	0.254799	858	194.51	663.49	26	10	13.9101	12.0899	serine protease	2	F:serine-type endopeptidase activity; P:proteolysis	EC:3.4.21.0	PF00089	Trypsin
CPIJ010085	Y	X	0.0150631	0.0158257	0.0460848	0.343405	417	85.063	331.937	9	5	3.84607	5.15393	netrin receptor	2	P:signal transduction; F:receptor binding	-	PF00147	Fibrinogen beta and gamma chains, C-terminal globular domain
CPIJ013316	Y	X	0.0150494	0.0161357	0.101352	0.159203	249	49.6574	199.343	8	3	4.88073	3.11927	zinc metalloproteinase	4	F:metal ion binding; F:metalloendopeptidase activity; P:proteolysis; F:zinc ion binding	EC:3.4.24.0	PF01400	Astacin (Peptidase family M12A)
CPIJ014738	Y	X	0.0150437	0.0175439	0.125572	0.139711	594	128.69	465.31	22	7	14.6164	7.38361	conserved hypothetical protein	1	F:DNA binding	-	PF03184	DDE superfamily endonuclease
CPIJ014791	Y	X	0.01504	0.0154421	0.0649981	0.237578	2472	543.81	1928.19	63	29	34.1949	28.8051	eukaryotic translation initiation factor 2c 2	2	P:translational initiation; F:translation initiation factor activity	-	PF02171	Piwi domain
CPIJ019016	Y	X	0.0150077	0.0220829	0.0386649	0.571137	603	136.572	466.428	15	7	5.08376	9.91624	fibrinogen and fibronectin	3	C:extracellular space; P:signal transduction; F:receptor binding	-	PF00147	Fibrinogen beta and gamma chains, C-terminal globular domain
CPIJ013560	Y	X	0.0150061	0.0181452	0.0965663	0.187904	507	107.163	399.837	17	6	9.99358	7.00642	conserved hypothetical protein	0	-
CPIJ008891	Y	X	0.0149689	0.0222435	0.0122902	1.80985	477	142.974	334.026	9	5	1.72141	7.27859	pre-mrna-splicing helicase brr2	3	F:nucleoside-triphosphatase activity; F:organic cyclic compound binding;	EC:3.6.1.15
CPIJ013870	Y	X	0.0149412	0.015229	0.022333	0.681904	294	93.2135	200.787	5	3	2.02523	2.97477	aael005882- partial	0	-
CPIJ802025	Y	X	0.0149236	0.0163127	0.0855543	0.19067	1563	356.857	1206.14	47	18	28.581	18.419	glucosyl glucuronosyl transferases	2	F:transferase activity, transferring hexosyl groups; P:metabolic process	EC:2.4.1.0	PF00201	UDP-glucoronosyl and UDP-glucosyl transferase
CPIJ008500	Y	X	0.0149091	0.01623	0.0358902	0.452213	252	50.7812	201.219	5	3	1.79091	3.20909	conserved hypothetical protein	3	C:extracellular region; F:chitin binding; P:chitin metabolic process	-
CPIJ016094	Y	X	0.0148883	0.0158441	0.122988	0.128827	753	148.498	604.502	26	9	17.0556	8.94439	hypothetical conserved protein	0	-		PF09777	Osteopetrosis-associated transmembrane protein 1 precursor
CPIJ007829	Y	X	0.0148753	0.0153657	0.191805	0.0801109	318	49.0973	268.903	12	4	8.3405	3.6595	alpha-esterase	1	F:hydrolase activity	-	PF00135	Carboxylesterase family
CPIJ012161	Y	X	0.0147831	0.0146835	0.0729998	0.201145	441	102.777	338.223	12	5	7.22051	4.77949	sphingomyelin phosphodiesterase	1	F:hydrolase activity	-	PF00149	Calcineurin-like phosphoesterase
CPIJ011204	Y	X	0.0147815	0.0150877	0.117359	0.12856	501	95.086	405.914	16	6	10.3305	5.66949	dna-repair protein xrcc1	3	P:single strand break repair; F:damaged DNA binding; C:nucleus	-	PF01834	XRCC1 N terminal domain
CPIJ005047	Y	X	0.0147619	0.0141905	0.0470289	0.301741	363	92.0327	270.967	8	4	4.23639	3.76361	zinc finger protein 517	3	F:nucleic acid binding; C:nucleus; F:zinc ion binding	-	PF00096	Zinc finger, C2H2 type
CPIJ019109	Y	X	0.0147321	0.0152808	0.0200633	0.761632	249	45.3625	203.637	4	3	0.905172	3.09483	predicted protein	4	F:metal ion binding; C:intracellular; F:zinc ion binding; P:intracellular signal transduction	-
CPIJ800107	Y	X	0.0147175	0.0146856	0.132648	0.110712	414	74.269	339.731	14	5	9.29349	4.70651	34 kda salivary secreted protein 34k-2	0	-
CPIJ020144	Y	X	0.0147085	0.0154247	0.145824	0.105776	276	72.0357	203.964	12	3	9.23433	2.76567	macroglobulin complement	4	P:negative regulation of endopeptidase activity; C:extracellular space; C:extracellular region; F:endopeptidase inhibitor activity		PF07703	Alpha-2-macroglobulin family N-terminal region
CPIJ018223	Y	X	0.0146921	0.0144986	0.0343954	0.421527	309	104.809	204.191	6	3	3.29448	2.70552	malate dehydrogenase	5	P:malate metabolic process; P:cellular carbohydrate metabolic process; P:oxidation-reduction process; F:nucleotide binding; F:L-malate dehydrogenase activity	EC:1.1.1.37
CPIJ009796	Y	X	0.0146821	0.0165167	0.0577557	0.285975	1104	286.679	817.321	29	12	15.9752	13.0248	lipoprotein lipase	3	C:extracellular region; F:phosphatidylcholine 1-acylhydrolase activity; P:lipid metabolic process	EC:3.1.1.32	PF00151	Lipase
CPIJ000626	Y	X	0.0146717	0.0149033	0.0401449	0.371237	513	104.05	408.95	10	6	4.06655	5.93345	predicted protein	2	C:nucleus; F:zinc ion binding	-	PF07776	Zinc-finger associated domain (zf-AD)
CPIJ016620	Y	X	0.0146266	0.0155378	0.115189	0.134889	261	55.894	205.106	9	3	6.02013	2.97987	conserved hypothetical protein	0	-		PF06080	Protein of unknown function (DUF938)
CPIJ012192	Y	X	0.0146257	0.0174183	0.125973	0.138269	1188	230.782	957.218	42	14	26.692	15.308	conserved hypothetical protein	9	F:signal transducer activity; P:cell surface receptor signaling pathway; F:phosphotyrosine binding; P:protein ubiquitination; F:calcium ion binding; P:regulation of signaling; F:ubiquitin-protein ligase activity; C:nucleus; F:zinc ion binding	EC:6.3.2.19	PF00627	UBA/TS-N domain
CPIJ001480	Y	X	0.0146213	0.0152752	0.0811331	0.188274	807	191.459	615.541	24	9	14.9505	9.04954	conserved hypothetical protein	2	F:zinc ion binding; C:intracellular		PF10453	Nuclear fragile X mental retardation-interacting protein 1 (NUFIP1)
CPIJ014311	Y	X	0.0146025	0.0178319	0.088218	0.202134	813	196.666	616.334	27	9	16.5292	10.4708	myrosinase mb1	3	P:carbohydrate metabolic process; F:hydrolase activity, hydrolyzing O-glycosyl compounds; F:cation binding	EC:3.2.1.0	PF00232	Glycosyl hydrolase family 1
CPIJ006817	Y	X	0.0145854	0.0232535	0.0767174	0.303106	531	119.63	411.37	18	6	8.81363	9.18637	salivary c-type lectin	1	F:carbohydrate binding	-	PF00059	Lectin C-type domain
CPIJ019692	Y	X	0.0145665	0.016612	0.0898353	0.184916	1569	333.286	1235.71	48	18	28.4764	19.5236	oligo- -glucosidase	3	P:carbohydrate metabolic process; F:cation binding; F:catalytic activity	-	PF00128	Alpha amylase, catalytic domain
CPIJ012220	Y	X	0.0145609	0.0159792	0.0967713	0.165124	5031	979.063	4051.94	156	59	92.6708	63.3292	microtubule binding protein d-clip-190	6	F:ATP binding; F:nucleotide binding; F:microtubule motor activity; P:microtubule-based movement; C:microtubule associated complex; C:microtubule
CPIJ013878	Y	X	0.014551	0.0157664	0.0667296	0.236273	1035	210.317	824.683	26	12	13.4962	12.5038	hypothetical protein CpipJ_CPIJ013878	0	-
CPIJ008374	Y	X	0.0145354	0.0155453	0.0208352	0.746108	1029	272.228	756.772	17	11	5.53003	11.47	arrestin domain-containing protein 2	0	-		PF02752	Arrestin (or S-antigen), C-terminal domain
CPIJ001237	Y	X	0.0145238	0.0156315	0.158179	0.0988221	831	142.473	688.527	31	10	20.9803	10.0197	conserved hypothetical protein	2	F:zinc ion binding; F:metal ion binding	-
CPIJ002137	Y	X	0.0145155	0.0150143	0.01902	0.789391	381	105.432	275.568	6	4	1.95871	4.04129	serine protease1 2	2	F:serine-type endopeptidase activity; P:proteolysis	EC:3.4.21.0	PF00089	Trypsin
CPIJ009633	Y	X	0.0144742	0.0168872	0.115002	0.146842	783	161.203	621.797	27	9	17.2369	9.76307	zinc finger protein 177	3	F:nucleic acid binding; C:nucleus; F:zinc ion binding	-	PF13894	C2H2-type zinc finger
CPIJ010497	Y	X	0.0144739	0.0195103	0.0724082	0.269449	825	203.191	621.809	26	9	14.2499	11.7501	elastase	2	F:serine-type endopeptidase activity; P:proteolysis	EC:3.4.21.0	PF00089	Trypsin
CPIJ800114	Y	X	0.0144698	0.0155741	0.108226	0.143904	444	98.452	345.548	15	5	9.96628	5.03372	kda salivary peptide	0	-
CPIJ003490	Y	X	0.0144521	0.0175504	0.0770707	0.227718	282	74.4168	207.583	9	3	5.50387	3.49613	conserved hypothetical protein	0	-
CPIJ019085	Y	X	0.014442	0.015441	0.0962652	0.160401	729	175.06	553.94	24	8	15.9198	8.08017	mitochondrial dna polymerase accessory subunit	7	C:integral to membrane; P:glycyl-tRNA aminoacylation; P:cholesterol transport; F:ATP binding; F:hedgehog receptor activity; C:cytoplasm; F:glycine-tRNA ligase activity	EC:6.1.1.14	PF03129	Anticodon binding domain
CPIJ001028	Y	X	0.0144306	0.0175782	0.0396006	0.443888	606	120.921	485.079	13	7	4.67511	8.32489	zinc finger protein 251	3	F:zinc ion binding; F:nucleic acid binding; C:intracellular	-	PF13465	Zinc-finger double domain
CPIJ007230	Y	X	0.0144266	0.0163255	0.0696671	0.234336	945	251.836	693.164	28	10	17.0213	10.9787	anterior fat body protein	0	-		PF08450	SMP-30/Gluconolaconase/LRE-like region
CPIJ012597	Y	X	0.0144257	0.0145384	0.0482557	0.301278	867	173.791	693.209	18	10	8.17541	9.82459	zinc finger protein	3	F:zinc ion binding; F:nucleic acid binding; C:intracellular	-	PF13894	C2H2-type zinc finger
CPIJ008383	Y	X	0.0143848	0.0154102	0.110829	0.139045	546	128.893	417.107	19	6	13.1038	5.89617	conserved hypothetical protein	0	-		PF00400	WD domain, G-beta repeat
CPIJ801440	Y	X	0.0143778	0.0160082	0.098824	0.161987	336	57.7933	278.207	10	4	5.61868	4.38132	conserved hypothetical protein	0	-		PF12937	F-box-like
CPIJ001027	Y	X	0.0143743	0.0180836	0.195595	0.0924545	246	37.2944	208.706	10	3	6.59026	3.40974	zinc finger protein 32	3	F:zinc ion binding; F:nucleic acid binding; C:intracellular	-	PF00096	Zinc finger, C2H2 type
CPIJ800116	Y	X	0.0143667	0.0132291	0.0940478	0.140664	459	110.972	348.028	14	5	9.71449	4.28551	kda salivary peptide	0	-
CPIJ001979	Y	X	0.0143439	0.0170093	0.0612284	0.2778	357	78.1365	278.864	9	4	4.51932	4.48068	conserved hypothetical protein	2	F:serine-type endopeptidase activity; P:proteolysis	EC:3.4.21.0	PF00089	Trypsin
CPIJ012598	Y	X	0.0143341	0.0145225	0.0208053	0.698019	708	149.89	558.11	11	8	3.05636	7.94364	zinc finger protein	3	F:zinc ion binding; F:nucleic acid binding; C:intracellular	-	PF00096	Zinc finger, C2H2 type
CPIJ011859	Y	X	0.0143302	0.0178044	0.111382	0.15985	969	201.393	767.607	34	11	21.1276	12.8724	zinc finger protein 729-like	3	F:zinc ion binding; F:nucleic acid binding; C:intracellular	-	PF13912	C2H2-type zinc finger
CPIJ014673	Y	X	0.0143183	0.0136343	0.0783354	0.174051	471	121.797	349.203	13	5	8.67234	4.32766	conserved hypothetical protein	3	C:intracellular; P:transport; F:transporter activity	-	PF00650	CRAL/TRIO domain
CPIJ005907	Y	X	0.0143078	0.0172455	0.056835	0.303431	1098	329.191	768.809	30	11	17.5578	12.4422	conserved hypothetical protein	0	-		PF05444	Protein of unknown function (DUF753)
CPIJ010565	Y	X	0.0142955	0.0140816	0.0708734	0.198686	459	109.24	349.76	12	5	7.33429	4.66571	hemolymph protein	0	-		PF07165	Protein of unknown function (DUF1397)
CPIJ012595	Y	X	0.0142911	0.0138763	0.0454923	0.305026	816	186.237	629.763	17	9	8.3684	8.6316	zinc finger protein	3	F:zinc ion binding; F:nucleic acid binding; C:intracellular	-	PF13894	C2H2-type zinc finger
CPIJ015688	Y	X	0.0142792	0.0154794	0.068194	0.22699	954	253.679	700.321	27	10	16.5986	10.4014	tryptase	2	F:serine-type endopeptidase activity; P:proteolysis	EC:3.4.21.0	PF00089	Trypsin
CPIJ015940	Y	X	0.0142629	0.0154698	0.0608745	0.254126	672	111.103	560.897	15	8	6.57049	8.42951	arylalkylamine n-acetyltransferase	1	F:N-acetyltransferase activity	-	PF00583	Acetyltransferase (GNAT) family
CPIJ004229	Y	X	0.0142311	0.0175642	0.109036	0.161086	471	119.658	351.342	18	5	12.2201	5.77991	gram-negative bacteria binding protein	2	P:carbohydrate metabolic process; F:hydrolase activity, hydrolyzing O-glycosyl compounds	EC:3.2.1.0	PF00722	Glycosyl hydrolases family 16
CPIJ016295	Y	X	0.0142231	0.0154488	0.017659	0.874838	258	47.0763	210.924	4	3	0.813061	3.18694	line-1 retrotransposon-like	3	F:RNA-directed DNA polymerase activity; P:RNA-dependent DNA replication; F:RNA binding	EC:2.7.7.49	PF00078	Reverse transcriptase (RNA-dependent DNA polymerase)
CPIJ800239	Y	X	0.0141773	0.014643	0.075065	0.19507	468	115.323	352.677	13	5	8.14251	4.85749	cytochrome p450 52d1	6	F:heme binding; F:oxidoreductase activity, acting on paired donors, with incorporation or reduction of molecular oxygen; F:monooxygenase activity; F:iron ion binding; F:electron carrier activity; P:oxidation-reduction process	-	PF00067	Cytochrome P450
CPIJ017859	Y	X	0.0141606	0.0137514	0.0519925	0.264487	276	64.1441	211.856	6	3	3.20247	2.79753	alcohol sulfotransferase a	1	F:sulfotransferase activity	EC:2.8.2.0	PF00685	Sulfotransferase domain
CPIJ014916	Y	X	0.0141561	0.0161282	0.237151	0.068008	252	40.0766	211.923	11	3	8.09047	2.90953	conserved hypothetical protein	1	F:odorant binding
CPIJ007223	Y	X	0.0141517	0.0234071	0.108267	0.216197	897	119.71	777.29	30	11	12.4803	17.5197	metaxin	2	P:protein targeting to mitochondrion; C:mitochondrial outer membrane	-	PF10568	Outer mitochondrial membrane transport complex protein
CPIJ002946	Y	X	0.0141489	0.0142451	0.127732	0.111524	252	39.9697	212.03	8	3	5.02636	2.97364	meprin a subunit beta	4	F:metal ion binding; F:metalloendopeptidase activity; P:proteolysis; F:zinc ion binding	EC:3.4.24.0	PF01400	Astacin (Peptidase family M12A)
CPIJ009563	Y	X	0.0141421	0.014576	0.0140781	1.03537	351	68.1564	282.844	5	4	0.943987	4.05601	no-on-transient a	2	F:nucleic acid binding; F:nucleotide binding	-	PF08075	NOPS (NUC059) domain
CPIJ014819	Y	X	0.0141269	0.0161535	0.0512304	0.31531	243	30.6386	212.361	5	3	1.56963	3.43037	conserved hypothetical protein	1	F:nucleic acid binding	-	PF12656	DExH-box splicing factor binding site
CPIJ015716	Y	X	0.0141249	0.0161951	0.079317	0.204182	291	78.6089	212.391	9	3	5.80019	3.19981	amp dependent ligase	2	F:ligase activity; P:metabolic process	-	PF00501	AMP-binding enzyme
CPIJ015553	Y	X	0.0141083	0.0190167	0.0631736	0.301023	429	74.5994	354.401	11	5	4.52661	6.47339	alanyl-trna synthetase domain-containing protein 1	5	F:nucleic acid binding; F:alanine-tRNA ligase activity; P:alanyl-tRNA aminoacylation; F:ATP binding; C:cytoplasm	EC:6.1.1.7	PF01411	tRNA synthetases class II (A)
CPIJ013455	Y	X	0.0141043	0.0141499	0.0490128	0.288698	840	272.798	567.202	20	8	12.498	7.50204	conserved hypothetical protein	0	-
CPIJ004961	Y	X	0.0140574	0.0154614	0.0743667	0.207908	267	53.5888	213.411	7	3	3.82939	3.17061	conserved hypothetical protein	0	-
CPIJ011163	Y	X	0.0140333	0.0142026	0.0238104	0.596486	633	134.188	498.812	10	7	3.10821	6.89179	zinc finger protein	3	F:nucleic acid binding; C:nucleus; F:zinc ion binding	-	PF13894	C2H2-type zinc finger
CPIJ010012	Y	X	0.0140324	0.0150064	0.0794668	0.188838	183	40.4731	142.527	5	2	3.003	1.997	hypothetical protein CpipJ_CPIJ010012	0	-
CPIJ009778	Y	X	0.0140269	0.016035	0.0562728	0.284951	1305	306.917	998.083	32	14	16.6091	15.3909	zinc finger protein 62	3	F:nucleic acid binding; C:nucleus; F:zinc ion binding	-	PF00096	Zinc finger, C2H2 type
CPIJ801510	Y	X	0.0140064	0.014233	0.128736	0.11056	1629	343.874	1285.13	59	18	41.7497	17.2503	conserved hypothetical protein	4	F:guanine deaminase activity; F:odorant binding; F:zinc ion binding; P:guanine catabolic process	EC:3.5.4.3	PF00024	PAN domain
CPIJ017954	Y	X	0.0140032	0.012737	0.117559	0.108345	498	69.5281	428.472	13	6	7.79523	5.20477	conserved hypothetical protein	0	-
CPIJ018631	Y	X	0.013997	0.0150218	0.157192	0.0955635	282	67.6683	214.332	13	3	9.97937	3.02063	glutathione-s-transferase gst	1	F:transferase activity	-	PF13417	Glutathione S-transferase, N-terminal domain
CPIJ005466	Y	X	0.013989	0.0143283	0.0539493	0.265588	723	151.124	571.876	16	8	7.97994	8.02006	serine collagenase 1	2	P:proteolysis; F:serine-type endopeptidase activity	EC:3.4.21.0	PF00089	Trypsin
CPIJ003717	Y	X	0.0139761	0.0151241	0.148051	0.102154	339	52.7983	286.202	12	4	7.72328	4.27672	vitamin k-dependent protein c	2	F:serine-type endopeptidase activity; P:proteolysis	EC:3.4.21.0	PF12032	Regulatory CLIP domain of proteinases
CPIJ016049	Y	X	0.0139722	0.0190028	0.0873515	0.217544	357	70.7166	286.283	11	4	5.84893	5.15107	cyclin j	1	C:nucleus	-	PF02984	Cyclin, C-terminal domain
CPIJ015368	Y	X	0.0139525	0.0151532	0.075448	0.200843	720	146.627	573.373	19	8	10.642	8.35799	serine protease sp24d	2	F:serine-type endopeptidase activity; P:proteolysis	EC:3.4.21.0	PF00089	Trypsin
CPIJ020193	Y	X	0.0139393	0.0149952	0.13976	0.107293	165	21.5207	143.479	5	2	2.9149	2.0851	conserved hypothetical protein	0	-
CPIJ019084	Y	X	0.0139233	0.0119946	0.0615382	0.194913	255	39.5341	215.466	5	3	2.42448	2.57552	origin recognition complex subunit 5	3	P:DNA replication; C:origin recognition complex; C:nucleus	-	PF13191	AAA ATPase domain
CPIJ013430	Y	X	0.0139217	0.0144496	0.0612589	0.235878	459	99.8482	359.152	11	5	5.95094	5.04906	serine protease	2	F:serine-type endopeptidase activity; P:proteolysis	EC:3.4.21.0	PF00089	Trypsin
CPIJ010521	Y	X	0.0139031	0.0143511	0.165506	0.0867104	780	132.662	647.338	28	9	19.6752	8.32483	serine protease inhibitor dipetalogastin	2	F:peptidase activity; P:proteolysis	-	PF00050	Kazal-type serine protease inhibitor domain
CPIJ016723	Y	X	0.013886	0.013729	0.0797161	0.172224	606	245.924	360.076	21	5	16.7709	4.22906	conserved hypothetical protein	3	F:chitin binding; P:chitin metabolic process; C:extracellular region
CPIJ015321	Y	X	0.0138731	0.0138152	0.000284319	48.5907	219	74.8357	144.164	2	2	0.0211404	1.97886	conserved hypothetical protein	0	-
CPIJ018735	Y	X	0.0138688	0.0162026	0.0607112	0.266879	453	92.4789	360.521	11	5	5.39108	5.60892	d7 protein	1	F:odorant binding	-	PF01395	PBP/GOBP family
CPIJ801520	Y	X	0.0138564	0.0145743	0.168581	0.0864527	372	83.3245	288.676	16	4	12.3123	3.6877	low molecular weight protein-tyrosine-phosphatase	4	C:cytoplasm; F:non-membrane spanning protein tyrosine phosphatase activity; P:peptidyl-tyrosine dephosphorylation; F:acid phosphatase activity	EC:3.1.3.2	PF01451	Low molecular weight phosphotyrosine protein phosphatase
CPIJ019923	Y	X	0.013845	0.0154847	0.0324783	0.476771	474	112.858	361.142	9	5	3.56344	5.43656	proclotting enzyme	2	F:serine-type endopeptidase activity; P:proteolysis	EC:3.4.21.0	PF12032	Regulatory CLIP domain of proteinases
CPIJ800303	Y	X	0.0138208	0.0138643	0.109192	0.126971	288	70.936	217.064	10	3	7.20185	2.79815	cytochrome p450	6	F:heme binding; F:oxidoreductase activity, acting on paired donors, with incorporation or reduction of molecular oxygen; F:monooxygenase activity; F:iron ion binding; F:electron carrier activity; P:oxidation-reduction process	-	PF00067	Cytochrome P450
CPIJ016766	Y	X	0.0138024	0.014515	0.0650581	0.223108	4062	1091.51	2970.49	109	41	67.8209	41.1791	conserved hypothetical protein	4	C:integral to membrane; P:homophilic cell adhesion; F:calcium ion binding; C:plasma membrane	-
CPIJ802285	Y	X	0.0137807	0.0170329	0.0507198	0.335823	378	87.7397	290.26	9	4	4.26344	4.73656	translocator protein	1	C:integral to membrane	-	PF03073	TspO/MBR family
CPIJ014219	Y	X	0.0137757	0.014593	0.133267	0.109502	558	122.451	435.549	21	6	15.1135	5.88655	cytochrome p450	6	F:heme binding; F:oxidoreductase activity, acting on paired donors, with incorporation or reduction of molecular oxygen; F:monooxygenase activity; F:iron ion binding; F:electron carrier activity; P:oxidation-reduction process	-	PF00067	Cytochrome P450
CPIJ005338	Y	X	0.013772	0.0211197	0.0529033	0.399212	942	215.89	726.11	26	10	11.0984	14.9016	prune protein	2	C:cytoplasm; F:pyrophosphatase activity	-	PF02833	DHHA2 domain
CPIJ018953	Y	X	0.0137285	0.0180517	0.0590506	0.305698	978	176.746	801.254	24	11	10.0593	13.9407	drosophila nna1 isoform a	3	P:proteolysis; F:metallocarboxypeptidase activity; F:zinc ion binding
CPIJ018964	Y	X	0.0136968	0.0141303	0.0436836	0.32347	219	72.9807	146.019	5	2	3.03546	1.96454	translocator protein	1	C:integral to membrane	-	PF03073	TspO/MBR family
CPIJ008482	Y	X	0.0136818	0.0152735	0.0873789	0.174797	792	207.282	584.718	26	8	17.4136	8.58635	prostasin	2	F:serine-type endopeptidase activity; P:proteolysis	EC:3.4.21.0	PF00089	Trypsin
CPIJ013875	Y	X	0.0136591	0.0131675	0.0488421	0.269593	387	94.1546	292.845	8	4	4.35136	3.64864	dna polymerase theta	1	F:catalytic activity	-
CPIJ802409	Y	X	0.0136404	0.0131371	0.0334906	0.392263	420	126.753	293.247	8	4	4.19395	3.80605	pre-mrna splicing factor prp17	0	-
CPIJ014651	Y	X	0.0136263	0.0134998	0.0256657	0.525987	300	79.8368	220.163	5	3	2.0404	2.9596	serine protease	2	F:serine-type endopeptidase activity; P:proteolysis	EC:3.4.21.0	PF00089	Trypsin
CPIJ019882	Y	X	0.0136216	0.0154282	0.0931137	0.165692	744	156.696	587.304	23	8	14.1886	8.81141	serine protease	2	F:serine-type endopeptidase activity; P:proteolysis	EC:3.4.21.0	PF00089	Trypsin
CPIJ016986	Y	X	0.0136191	0.0146959	0.0692729	0.212145	279	58.721	220.279	7	3	3.89795	3.10205	conserved hypothetical protein	0	-
CPIJ007760	Y	X	0.0136	0.0128283	0.0192751	0.665538	216	68.9412	147.059	3	2	1.23984	1.76016	hypothetical protein CpipJ_CPIJ007760	0	-
CPIJ000369	Y	X	0.0135896	0.0162287	0.0327084	0.496164	567	125.485	441.515	11	6	4.0062	6.9938	lysine-specific demethylase 6a	2	F:methyltransferase activity; P:methylation		PF00515	Tetratricopeptide repeat
CPIJ002597	Y	X	0.0135862	0.0141631	0.0405132	0.349593	765	176.169	588.831	15	8	6.91725	8.08275	conserved hypothetical protein	0	-
CPIJ008578	Y	X	0.0135857	0.0145066	0.0262018	0.553649	405	110.572	294.428	7	4	2.82916	4.17084	conserved hypothetical protein	4	C:cytoplasm; F:arginine-tRNA ligase activity; P:arginyl-tRNA aminoacylation; F:ATP binding	EC:6.1.1.19
CPIJ003373	Y	X	0.0135761	0.0193612	0.0823592	0.235083	294	73.0229	220.977	10	3	5.8432	4.1568	ankyrin repeat domain protein	0	-		PF12796	Ankyrin repeats (3 copies)
CPIJ001605	Y	X	0.0135753	0.0137187	0.0096829	1.41679	1983	730.726	1252.27	24	17	7.00114	16.9989	mucin 91c	0	-
CPIJ014951	Y	X	0.013573	0.0144581	0.00971933	1.48756	528	85.9468	442.053	7	6	0.809151	6.19085	fk506-binding protein	5	P:protein folding; P:protein peptidyl-prolyl isomerization; F:peptidyl-prolyl cis-trans isomerase activity; F:calcium ion binding; F:chromatin binding	EC:5.2.1.8	PF00254	FKBP-type peptidyl-prolyl cis-trans isomerase
CPIJ000628	Y	X	0.0135466	0.0150756	0.0385028	0.391545	1770	441.25	1328.75	36	18	16.5208	19.4792	conserved hypothetical protein	2	F:zinc ion binding; C:nucleus	-	PF07776	Zinc-finger associated domain (zf-AD)
CPIJ012834	Y	X	0.0135404	0.0170196	0.0733094	0.232161	270	48.4408	221.559	7	3	3.39499	3.60501	conserved hypothetical protein	0	-		PF13855	Leucine rich repeat
CPIJ000937	Y	X	0.0135204	0.0124609	0.0800368	0.155689	297	75.1126	221.887	8	3	5.47977	2.52023	techylectin-5B	2	P:signal transduction; F:receptor binding	-	PF00147	Fibrinogen beta and gamma chains, C-terminal globular domain
CPIJ014110	Y	X	0.0135072	0.020988	0.215884	0.0972189	384	87.861	296.139	22	4	16.5703	5.42974	aael012157- partial	2	F:peptidase activity; P:proteolysis	-	PF04389	Peptidase family M28
CPIJ801870	Y	X	0.0135015	0.0142103	0.253476	0.0560615	993	178.274	814.726	51	11	40.5985	10.4015	neurotransmitter gated ion channel	6	F:acetylcholine-activated cation-selective channel activity; C:postsynaptic membrane; C:cell junction; C:plasma membrane; P:ion transport; C:integral to membrane	-	PF02931	Neurotransmitter-gated ion-channel ligand binding domain
CPIJ010298	Y	X	0.0134572	0.0138286	0.0884447	0.156353	651	130.834	520.166	18	7	11.1	6.90002	coagulation factor vii	2	F:serine-type endopeptidase activity; P:proteolysis	EC:3.4.21.0	PF12032	Regulatory CLIP domain of proteinases
CPIJ801497	Y	X	0.0134435	0.0170427	0.0302633	0.563147	201	52.2292	148.771	4	2	1.53605	2.46395	serine protease	2	F:serine-type endopeptidase activity; P:proteolysis	EC:3.4.21.0	PF12032	Regulatory CLIP domain of proteinases
CPIJ003918	Y	X	0.0134403	0.0139171	0.0965412	0.144157	342	44.3882	297.612	8	4	4.06807	3.93193	growth and transformation-dependent protein	0	-		PF06388	Protein of unknown function (DUF1075)
CPIJ004326	Y	X	0.0134171	0.0131466	0.102138	0.128714	378	79.8738	298.126	11	4	7.43032	3.56968	conserved hypothetical protein	0	-
CPIJ012701	Y	X	0.0134161	0.0142138	0.133301	0.10663	273	49.3875	223.612	9	3	6.06964	2.93036	CHKov1	1	F:transferase activity, transferring phosphorus-containing groups	-	PF02958	Ecdysteroid kinase
CPIJ012591	Y	X	0.0134132	0.0206486	0.034533	0.597938	297	73.3403	223.66	7	3	2.47921	4.52079	znf235 protein	3	F:nucleic acid binding; C:nucleus; F:zinc ion binding	-	PF00096	Zinc finger, C2H2 type
CPIJ017738	Y	X	0.0133932	0.01912	0.151975	0.12581	393	94.3411	298.659	18	4	12.8729	5.12706	coagulation factor vii	2	F:serine-type endopeptidase activity; P:proteolysis	EC:3.4.21.0	PF00089	Trypsin
CPIJ014195	Y	X	0.0133492	0.0134207	0.0520399	0.257892	711	186.624	524.376	16	7	9.27736	6.72264	conserved hypothetical protein	3	C:extracellular region; F:chitin binding; P:chitin metabolic process	-	PF01607	Chitin binding Peritrophin-A domain
CPIJ008914	Y	X	0.0133398	0.0137497	0.0696895	0.197299	348	48.1454	299.855	7	4	3.1407	3.8593	conserved hypothetical protein	0	-
CPIJ012266	Y	X	0.0133051	0.0182714	0.122637	0.148988	1305	252.774	1052.23	47	14	29.0089	17.9911	dna polymerase subunit gamma mitochondrial	4	F:DNA-directed DNA polymerase activity; P:DNA replication; F:DNA binding; C:gamma DNA polymerase complex	EC:2.7.7.7	PF00476	DNA polymerase family A
CPIJ014263	Y	X	0.0132696	0.0145876	0.0140102	1.04121	213	62.279	150.721	3	2	0.852312	2.14769	hypothetical protein CpipJ_CPIJ014263	0	-
CPIJ012580	Y	X	0.0132695	0.0137592	0.0485346	0.283492	288	61.9169	226.083	6	3	2.94819	3.05181	caspase-3 precursor	3	P:apoptotic process; P:proteolysis; F:cysteine-type endopeptidase activity	EC:3.4.22.0	PF00656	Caspase domain
CPIJ800227	Y	X	0.0132298	0.0130123	0.124966	0.104126	756	151.304	604.696	25	8	17.6535	7.34649	cytochrome p450	6	F:heme binding; F:oxidoreductase activity, acting on paired donors, with incorporation or reduction of molecular oxygen; F:monooxygenase activity; F:iron ion binding; F:electron carrier activity; P:oxidation-reduction process	-	PF00067	Cytochrome P450
CPIJ018923	Y	X	0.0132256	0.0142609	0.231906	0.0614941	447	68.9446	378.055	19	5	14.2088	4.79121	conserved hypothetical protein	0	-
CPIJ006012	Y	X	0.0132122	0.01333	0.042782	0.311581	753	223.187	529.813	16	7	9.19728	6.80272	serine protease	2	F:serine-type endopeptidase activity; P:proteolysis	EC:3.4.21.0	PF00089	Trypsin
CPIJ004801	Y	X	0.0132045	0.0134173	0.0110925	1.20959	318	90.8039	227.196	4	3	0.993432	3.00657	hypothetical protein CpipJ_CPIJ004801	0	-
CPIJ008060	Y	X	0.0131618	0.0128027	0.161882	0.0790864	312	84.0681	227.932	14	3	11.5281	2.47191	aael017229- partial	3	F:zinc ion binding; F:nucleic acid binding; C:intracellular	-	PF00096	Zinc finger, C2H2 type
CPIJ015255	Y	X	0.0131452	0.0145486	0.0210661	0.690618	267	38.7797	228.22	4	3	0.789839	3.21016	aael003788- partial	2	F:metal ion binding; F:zinc ion binding
CPIJ802473	Y	X	0.0131285	0.0135225	0.0503156	0.268754	696	162.81	533.19	15	7	7.9781	7.0219	conserved hypothetical protein	0	-		PF13855	Leucine rich repeat
CPIJ012838	Y	X	0.0131247	0.013151	0.0473841	0.27754	318	89.4233	228.577	7	3	4.09494	2.90506	ketohexokinase-like isoform 2	2	F:kinase activity; P:phosphorylation	-	PF00294	pfkB family carbohydrate kinase
CPIJ010195	Y	X	0.0130887	0.016055	0.119873	0.133934	270	40.794	229.206	8	3	4.56485	3.43515	conserved hypothetical protein	3	P:metabolic process; F:catalytic activity; F:sulfuric ester hydrolase activity
CPIJ016937	Y	X	0.0130509	0.0143115	0.0667903	0.214275	627	167.262	459.738	17	6	10.6988	6.30118	coagulation factor x	2	F:serine-type endopeptidase activity; P:proteolysis	EC:3.4.21.0	PF00089	Trypsin
CPIJ001205	Y	X	0.0130381	0.0123744	0.170004	0.0727889	297	66.9064	230.094	13	3	10.3973	2.60269	fanconi anemia group j protein	5	F:DNA binding; P:nucleobase-containing compound metabolic process; F:ATP-dependent DNA helicase activity; F:ATP binding; C:nucleus	-	PF13307	Helicase C-terminal domain
CPIJ006675	Y	X	0.0130339	0.0139702	0.115661	0.120785	570	109.661	460.339	18	6	11.944	6.05603	oocyte zinc finger protein xlcof6	3	F:nucleic acid binding; C:nucleus; F:zinc ion binding	-	PF00096	Zinc finger, C2H2 type
CPIJ005089	Y	X	0.0130331	0.0185203	0.0844328	0.21935	711	173.904	537.096	23	7	13.7113	9.28874	conserved hypothetical protein	0	-
CPIJ017111	Y	X	0.0129969	0.0196685	0.0668245	0.294331	285	54.1748	230.825	8	3	3.54913	4.45087	bola-like protein 3-like	0	-		PF01722	BolA-like protein
CPIJ006344	Y	X	0.0129962	0.0135598	0.116415	0.116479	573	111.328	461.672	18	6	12.1373	5.8627	conserved hypothetical protein	0	-
CPIJ015401	Y	X	0.0129931	0.0150476	0.0425664	0.353509	327	96.1087	230.891	7	3	3.78528	3.21472	galactose-specific c-type lectin	3	F:carbohydrate binding; P:proteolysis; F:serine-type endopeptidase activity	EC:3.4.21.0	PF00059	Lectin C-type domain
CPIJ007859	Y	X	0.012979	0.0126042	0.139183	0.0905584	573	110.713	462.287	19	6	13.7868	5.21321	zinc finger protein 58	3	F:nucleic acid binding; C:nucleus; F:zinc ion binding	-	PF00096	Zinc finger, C2H2 type
CPIJ801479	Y	X	0.0129377	0.014091	0.108307	0.130103	297	65.1189	231.881	10	3	6.83395	3.16605	serine protease	2	F:serine-type endopeptidase activity; P:proteolysis	EC:3.4.21.0
CPIJ017458	Y	X	0.0129179	0.0158809	0.146859	0.108137	471	83.9391	387.061	17	5	11.3436	5.6564	4-coumarate- ligase 1	2	F:ligase activity; P:metabolic process	-	PF13193	Domain of unknown function (DUF4009)
CPIJ019572	Y	X	0.0129089	0.0140167	0.0966008	0.145099	354	44.1356	309.864	8	4	3.96295	4.03705	glutathione transferase	1	F:transferase activity	-	PF00043	Glutathione S-transferase, C-terminal domain
CPIJ020330	Y	X	0.0128827	0.0136618	0.160178	0.0852913	216	60.7532	155.247	9	2	7.38946	1.61054	conserved hypothetical protein	0	-
CPIJ018061	Y	X	0.0128782	0.0133911	0.118634	0.112878	798	176.797	621.203	27	8	19.3325	7.66752	thymus-specific serine protease	2	F:serine-type peptidase activity; P:proteolysis	-	PF05577	Serine carboxypeptidase S28
CPIJ004427	Y	X	0.0127919	0.01425	0.0560227	0.254361	267	32.4774	234.523	5	3	1.76257	3.23743	conserved hypothetical protein	2	F:zinc ion binding; F:metal ion binding	-	PF01753	MYND finger
CPIJ009520	Y	X	0.0127864	0.0134863	0.0886798	0.152079	1056	195.709	860.291	28	11	16.7815	11.2185	gpi-anchor transamidase	5	F:chitin binding; P:proteolysis; P:chitin metabolic process; C:extracellular region; F:cysteine-type endopeptidase activity		PF00050	Kazal-type serine protease inhibitor domain
CPIJ008508	Y	X	0.0127849	0.0159213	0.0198472	0.802196	237	80.5662	156.434	4	2	1.56396	2.43604	protein	0	-		PF03103	Domain of unknown function (DUF243)
CPIJ016921	Y	X	0.0127604	0.0137861	0.0802648	0.171758	741	192.429	548.571	22	7	14.7686	7.23137	serine 3-dehydrogenase	3	F:oxidoreductase activity; P:oxidation-reduction process; F:nucleotide binding	-	PF00106	short chain dehydrogenase
CPIJ002398	Y	X	0.0127236	0.0142145	0.0532723	0.266827	1638	380.488	1257.51	37	16	19.6613	17.3387	conserved hypothetical protein	0	-
CPIJ002233	Y	X	0.0127232	0.0141703	0.0607873	0.233113	471	78.0158	392.984	10	5	4.5993	5.4007	sphingomyelin synthetase	0	-
CPIJ002786	Y	X	0.0126886	0.0140963	0.0791024	0.178203	210	52.3779	157.622	6	2	3.90556	2.09444	aael000905- partial	1	F:hydrolase activity	-	PF00135	Carboxylesterase family
CPIJ009136	Y	X	0.0126861	0.0142141	0.0819382	0.173474	288	51.5213	236.479	7	3	3.89705	3.10295	conserved hypothetical protein	0	-		PF07258	HCaRG protein
CPIJ009130	Y	X	0.0126626	0.0133914	0.0182687	0.733025	1071	202.299	868.701	15	11	3.61645	11.3835	serine protease	2	F:serine-type endopeptidase activity; P:proteolysis	EC:3.4.21.0	PF00089	Trypsin
CPIJ010859	Y	X	0.0126438	0.0172019	0.0211521	0.81325	225	66.8205	158.18	4	2	1.36745	2.63255	conserved hypothetical protein	0	-
CPIJ013288	Y	X	0.0126273	0.0177154	0.0878117	0.201743	297	59.4202	237.58	9	3	4.98166	4.01834	fibrinogen and fibronectin	2	P:signal transduction; F:receptor binding	-	PF00147	Fibrinogen beta and gamma chains, C-terminal globular domain
CPIJ000330	Y	X	0.0126231	0.012544	0.0343394	0.365294	222	63.56	158.44	4	2	2.09359	1.90641	fibrinogen and fibronectin	2	P:signal transduction; F:receptor binding	-	PF00147	Fibrinogen beta and gamma chains, C-terminal globular domain
CPIJ020041	Y	X	0.012612	0.0134811	0.0616202	0.218777	546	149.551	396.449	14	5	8.86097	5.13903	3-alpha-(or 20-beta)-hydroxysteroid dehydrogenase	3	F:oxidoreductase activity; P:oxidation-reduction process; F:nucleotide binding	-	PF00106	short chain dehydrogenase
CPIJ005040	Y	X	0.0126082	0.0123303	0.000246606	50	357	198.373	158.627	2	2	0.0488018	1.9512	conserved hypothetical protein	0	-
CPIJ006382	Y	X	0.0125932	0.0196113	0.0913973	0.214572	501	103.96	397.04	16	5	8.7937	7.2063	paired box protein pax-6	4	F:DNA binding; P:multicellular organismal development; C:nucleus; P:regulation of transcription, DNA-dependent	-	PF00292	'Paired box' domain
CPIJ008854	Y	X	0.0125926	0.012638	0.112219	0.112619	618	141.528	476.472	20	6	14.5017	5.49828	maltose phosphorylase	2	F:catalytic activity; P:carbohydrate metabolic process	-	PF03632	Glycosyl hydrolase family 65 central catalytic domain
CPIJ002814	Y	X	0.0125889	0.0131419	0.0784357	0.167551	201	42.13	158.87	5	2	3.06405	1.93595	p300 cbp acetyl-transferase	2	F:calcium ion binding; F:calcium-dependent phospholipid binding	-
CPIJ012599	Y	X	0.0125883	0.0149083	0.024236	0.615129	597	120.366	476.634	10	6	2.9105	7.0895	zinc finger protein	3	F:zinc ion binding; F:nucleic acid binding; C:intracellular	-	PF13894	C2H2-type zinc finger
CPIJ014493	Y	X	0.01258	0.0144235	0.124153	0.116175	909	193.576	715.424	32	9	22.3876	9.61241	transient receptor potential cation channel protein painless	6	C:integral to membrane; C:membrane; P:transmembrane transport; P:ion transport; F:ion channel activity; P:transport
CPIJ009930	Y	X	0.0125684	0.0126488	0.0201984	0.626225	555	157.176	397.824	8	5	3.09475	4.90525	conserved hypothetical protein	1	C:integral to membrane	-
CPIJ011636	Y	X	0.0125618	0.0129229	0.114717	0.112651	417	98.5743	318.426	14	4	10.2647	3.7353	cytochrome p450	6	F:heme binding; F:oxidoreductase activity, acting on paired donors, with incorporation or reduction of molecular oxygen; F:monooxygenase activity; F:iron ion binding; F:electron carrier activity; P:oxidation-reduction process	-	PF00067	Cytochrome P450
CPIJ802491	Y	X	0.0125135	0.0171249	0.0976162	0.175431	510	110.433	399.567	17	5	10.3992	6.6008	conserved hypothetical protein	0	-		PF13855	Leucine rich repeat
CPIJ016428	Y	X	0.0124968	0.0136143	0.0566537	0.240308	4218	1017.18	3200.82	98	40	55.8027	42.1973	ion channel nompc	0	-		PF12796	Ankyrin repeats (3 copies)
CPIJ801713	Y	X	0.0124922	0.0168302	0.102634	0.163983	411	90.7997	320.2	14	4	8.87044	5.12956	hypothetical protein CpipJ_CPIJ001871	1	F:odorant binding	-	PF01395	PBP/GOBP family
CPIJ009503	Y	X	0.0124784	0.012867	0.0568366	0.226385	903	181.751	721.249	19	9	10.0086	8.99143	zinc finger protein 583	3	F:nucleic acid binding; C:nucleus; F:zinc ion binding	-	PF00096	Zinc finger, C2H2 type
CPIJ007465	Y	X	0.012456	0.0138456	0.0318702	0.434437	843	200.739	642.261	15	8	6.27623	8.72377	conserved hypothetical protein	0	-		PF07985	SRR1
CPIJ016767	Y	X	0.0124484	0.0126888	0.104062	0.121936	426	104.673	321.327	14	4	10.1869	3.81315	conserved hypothetical protein	4	C:integral to membrane; P:homophilic cell adhesion; F:calcium ion binding; C:plasma membrane	-
CPIJ009385	Y	X	0.0124468	0.013274	0.0763804	0.173788	630	147.95	482.05	17	6	10.8541	6.14593	predicted protein	2	F:zinc ion binding; F:metal ion binding	-	PF12937	F-box-like
CPIJ005135	Y	X	0.0124428	0.0163202	0.112673	0.144845	705	142.426	562.574	24	7	15.2659	8.73407	peroxisome assembly factor 1	2	F:zinc ion binding; F:metal ion binding	-	PF04757	Pex2 / Pex12 amino terminal region
CPIJ002572	Y	X	0.0124425	0.0127998	0.0668887	0.191359	291	49.8908	241.109	6	3	3.11723	2.88277	conserved hypothetical protein	4	C:integral to membrane; F:ion channel activity; P:ion transport; P:transmembrane transport	-	PF00520	Ion transport protein
CPIJ002192	Y	X	0.0124423	0.0129437	0.0742657	0.174289	393	71.5149	321.485	9	4	5.04629	3.95371	sterile alpha motif domain-containing protein	0	-		PF07647	SAM domain (Sterile alpha motif)
CPIJ010015	Y	X	0.0124388	0.0126988	0.0593176	0.214081	543	141.031	401.969	13	5	8.07363	4.92637	conserved hypothetical protein	0	-
CPIJ018270	Y	X	0.0124342	0.0133852	0.0769865	0.173864	1224	258.918	965.082	32	12	19.4168	12.5832	conserved hypothetical protein	0	-		PF02363	Cysteine rich repeat
CPIJ003251	Y	X	0.0124306	0.0121432	0.0677796	0.179157	495	92.766	402.234	11	5	6.19081	4.80919	conserved hypothetical protein	2	F:zinc ion binding; C:nucleus	-	PF04500	FLYWCH zinc finger domain
CPIJ011002	Y	X	0.012426	0.0123103	0.116635	0.105545	507	104.617	402.383	16	5	11.3802	4.61984	bile salt sulfotransferase 1	1	F:sulfotransferase activity	EC:2.8.2.0	PF00685	Sulfotransferase domain
CPIJ005220	Y	X	0.0123968	0.0151923	0.064624	0.235087	627	143.004	483.996	16	6	8.91043	7.08957	conserved hypothetical protein	0	-
CPIJ012961	Y	X	0.012396	0.0124053	0.065976	0.188027	405	82.3159	322.684	9	4	5.18111	3.81889	cartilage oligomeric matrix protein	3	F:calcium ion binding; P:cell adhesion; C:extracellular region
CPIJ010699	Y	X	0.012396	0.014116	0.0284795	0.495654	111	30.329	80.671	2	1	0.862674	1.13733	cecropin a	3	C:extracellular region; P:innate immune response; P:defense response to bacterium	-	PF00272	Cecropin family
CPIJ006212	Y	X	0.0123927	0.0131833	0.0336249	0.39207	654	169.843	484.157	12	6	5.66669	6.33331	conserved hypothetical protein	0	-		PF12937	F-box-like
CPIJ012908	Y	X	0.0123827	0.0143034	0.0848053	0.168662	999	191.42	807.58	27	10	15.775	11.225	glutaminyl-peptide cyclotransferase	3	P:proteolysis; F:transferase activity; F:peptidase activity	-	PF04389	Peptidase family M28
CPIJ007028	Y	X	0.0123789	0.0122802	0.0439796	0.279225	735	169.522	565.478	14	7	7.24857	6.75143	conserved hypothetical protein	0	-
CPIJ004352	Y	X	0.0123764	0.0131847	0.0719607	0.183221	1731	357.42	1373.58	42	17	24.6461	17.3539	zinc finger protein	3	F:zinc ion binding; F:nucleic acid binding; C:intracellular	-	PF13894	C2H2-type zinc finger
CPIJ003059	Y	X	0.0123757	0.0132077	0.147787	0.0893704	303	60.5897	242.41	11	3	8.10279	2.89721	acyl- oxidase	5	F:flavin adenine dinucleotide binding; C:peroxisome; P:fatty acid beta-oxidation; F:acyl-CoA dehydrogenase activity; F:acyl-CoA oxidase activity	EC:1.3.99.3; EC:1.3.3.6	PF02770	Acyl-CoA dehydrogenase, middle domain
CPIJ001242	Y	X	0.012338	0.0142838	0.0378648	0.377232	630	143.697	486.303	12	6	5.27094	6.72906	conserved hypothetical protein	0	-		PF05773	RWD domain
CPIJ014122	Y	X	0.0123261	0.0130603	0.103567	0.126105	669	101.098	567.902	17	7	9.95098	7.04902	dehydrogenase reductase sdr family member 8	3	F:oxidoreductase activity; P:oxidation-reduction process; F:nucleotide binding	-	PF00106	short chain dehydrogenase
CPIJ004876	Y	X	0.012314	0.0125482	0.0389586	0.32209	540	133.958	406.042	10	5	5.05999	4.94001	conserved hypothetical protein	0	-
CPIJ802439	Y	X	0.0123082	0.0121478	0.0728709	0.166703	639	151.519	487.481	16	6	10.4144	5.58559	juvenile hormone esterase-binding protein	0	-
CPIJ018890	Y	X	0.0123054	0.0136819	0.0280674	0.487466	228	65.4703	162.53	4	2	1.80985	2.19015	transient receptor potential cation channel protein painless	9	P:transmembrane transport; C:nucleosome; C:integral to membrane; P:ion transport; F:DNA binding; F:ion channel activity; P:nucleosome assembly; F:protein heterodimerization activity; C:nucleus	-
CPIJ007902	Y	X	0.0123004	0.0126927	0.0184805	0.686817	780	210.915	569.085	11	7	3.85539	7.14461	conserved hypothetical protein	3	C:extracellular region; F:chitin binding; P:chitin metabolic process	-	PF01607	Chitin binding Peritrophin-A domain
CPIJ012084	Y	X	0.0122733	0.0134805	0.182653	0.0738039	474	66.6104	407.39	17	5	11.7129	5.28705	conserved hypothetical protein	2	C:nucleus; P:DNA replication	-	PF09507	DNA polymerase subunit Cdc27
CPIJ010976	Y	X	0.0122695	0.0133671	0.0390482	0.342324	291	46.4913	244.509	5	3	1.78548	3.21452	phosphatidylcholine-sterol acyltransferase	2	P:lipid metabolic process; F:O-acyltransferase activity	-	PF02450	Lecithin:cholesterol acyltransferase
CPIJ004700	Y	X	0.012248	0.0121611	0.0243582	0.499262	333	88.0622	244.938	5	3	2.09323	2.90677	conserved hypothetical protein	3	C:integral to membrane; P:cell adhesion; P:tissue regeneration	-	PF04923	Ninjurin
CPIJ004938	Y	X	0.0122351	0.0128303	0.0529988	0.242086	990	254.411	735.589	22	9	12.9415	9.05848	iduronate 2-sulfatase	2	P:metabolic process; F:sulfuric ester hydrolase activity	EC:3.1.6.0	PF00884	Sulfatase
CPIJ001201	Y	X	0.0122166	0.0128937	0.0494344	0.260825	816	161.155	654.845	16	8	7.76754	8.23246	neutral alpha-glucosidase ab	3	F:carbohydrate binding; P:carbohydrate metabolic process; F:hydrolase activity, hydrolyzing O-glycosyl compounds	EC:3.2.1.0	PF00088	Trefoil (P-type) domain
CPIJ015106	Y	X	0.0121838	0.0130795	0.0743857	0.175834	327	80.7716	246.228	9	3	5.8593	3.1407	anionic trypsin-2	2	F:serine-type endopeptidase activity; P:proteolysis	EC:3.4.21.0	PF00089	Trypsin
CPIJ018250	Y	X	0.012182	0.0125821	0.000251643	50	369	122.735	246.265	3	3	0.0296079	2.97039	hypothetical protein CpipJ_CPIJ018250	0	-
CPIJ006123	Y	X	0.0121598	0.0135758	0.106099	0.127954	1353	201.668	1151.33	35	14	20.2254	14.7746	prolylcarboxypeptidase	3	F:carboxypeptidase activity; F:serine-type peptidase activity; P:proteolysis	-	PF05577	Serine carboxypeptidase S28
CPIJ013877	Y	X	0.0121518	0.013596	0.0542713	0.250519	438	108.831	329.169	10	4	5.68921	4.31079	hypothetical protein CpipJ_CPIJ013877	0	-
CPIJ801500	Y	X	0.0121427	0.0138368	0.0799286	0.173115	2010	445.269	1564.73	55	19	34.1966	20.8034	aminopeptidase mitochondrial	4	F:metalloendopeptidase activity; P:proteolysis; F:zinc ion binding; F:aminopeptidase activity	EC:3.4.24.0; EC:3.4.11.0	PF11838	Domain of unknown function (DUF3358)
CPIJ011224	Y	X	0.0121406	0.0143315	0.0564203	0.254014	825	248.422	576.578	20	7	12.5821	7.41786	zinc finger protein gfi-1	3	F:nucleic acid binding; C:nucleus; F:zinc ion binding	-	PF00096	Zinc finger, C2H2 type
CPIJ019022	Y	X	0.0121388	0.0128723	0.0630781	0.20407	429	99.4787	329.521	10	4	5.96667	4.03333	pupal cuticle protein	1	F:structural constituent of cuticle	-	PF00379	Insect cuticle protein
CPIJ009806	Y	X	0.0121258	0.017048	0.13574	0.125593	915	172.782	742.218	34	9	22.085	11.915	coiled-coil domain-containing protein 76	3	P:methylation; F:methyltransferase activity; P:tRNA processing	EC:2.1.1.0	PF05206	Methyltransferase TRM13
CPIJ015505	Y	X	0.0121184	0.0159213	0.124501	0.127881	318	70.4423	247.558	12	3	8.2792	3.7208	predicted protein	0	-		PF00050	Kazal-type serine protease inhibitor domain
CPIJ011927	Y		0.0121169	0.0114505	0.0595937	0.192143	222	56.941	165.059	5	2	3.21135	1.78865	seven transmembrane receptor	1	C:integral to membrane
CPIJ005450	Y	X	0.0121036	0.0133829	0.038123	0.351044	429	98.5192	330.481	8	4	3.67382	4.32618	lysozyme	2	P:cell wall macromolecule catabolic process; F:lysozyme activity	EC:3.2.1.17	PF00062	C-type lysozyme/alpha-lactalbumin family
CPIJ009123	Y	X	0.0121024	0.013522	0.0737079	0.183453	1146	237.093	908.907	29	11	17.026	11.974	conserved hypothetical protein	3	F:nucleic acid binding; C:nucleus; F:zinc ion binding	-	PF13465	Zinc-finger double domain
CPIJ001056	Y	X	0.0120887	0.015192	0.135373	0.112223	738	158.946	579.054	28	7	19.8745	8.12547	clip-domain serine proteinase	2	F:serine-type endopeptidase activity; P:proteolysis	EC:3.4.21.0	PF00089	Trypsin
CPIJ017664	Y	X	0.0120624	0.0120529	0.000241059	50	228	62.1963	165.804	2	2	0.0148931	1.98511	conserved hypothetical protein	0	-
CPIJ015248	Y		0.012049	0.0114237	0.142085	0.0804002	414	82.0216	331.978	14	4	10.5627	3.43728	conserved hypothetical protein	1	F:zinc ion binding	-	PF12906	RING-variant domain
CPIJ004786	Y	X	0.0120443	0.0135104	0.0980609	0.137776	1014	183.734	830.266	28	10	17.2564	10.7436	conserved hypothetical protein	3	F:zinc ion binding; F:nucleic acid binding; C:intracellular	-	PF13909	C2H2-type zinc-finger domain
CPIJ017284	Y	X	0.0120396	0.0182448	0.200962	0.0907873	276	26.8222	249.178	9	3	4.88225	4.11775	conserved hypothetical protein	0	-		PF12937	F-box-like
CPIJ009833	Y	X	0.0120332	0.01254	0.0860618	0.14571	540	124.484	415.516	15	5	10.0917	4.90826	conserved hypothetical protein	0	-
CPIJ014161	Y	X	0.0120319	0.0150937	0.0989243	0.152578	444	111.55	332.45	15	4	10.3112	4.68877	upf0672 protein c3orf58-like protein	1	F:transferase activity, transferring phosphorus-containing groups
CPIJ019276	Y	X	0.0120246	0.0153368	0.0655627	0.233926	318	68.5112	249.489	8	3	4.31998	3.68002	fibrinogen gamma chain	2	P:signal transduction; F:receptor binding	-	PF00147	Fibrinogen beta and gamma chains, C-terminal globular domain
CPIJ003041	Y	X	0.0120213	0.0143345	0.127376	0.112537	297	47.4431	249.557	9	3	5.65341	3.34659	cuticle protein	1	F:structural constituent of cuticle	-	PF00379	Insect cuticle protein
CPIJ008680	Y	X	0.0119761	0.0136829	0.0572687	0.238925	825	157.003	667.997	18	8	8.92615	9.07385	zinc finger protein 26 (zfp-26) (protein mkr3)	3	F:nucleic acid binding; C:nucleus; F:zinc ion binding	-	PF05485	THAP domain
CPIJ802194	Y	X	0.0119591	0.0127982	0.0852923	0.150051	702	116.67	585.33	17	7	9.69877	7.30123	conserved hypothetical protein	0	-		PF00612	IQ calmodulin-binding motif
CPIJ014737	Y	X	0.0119031	0.0134124	0.109057	0.122986	648	143.931	504.069	21	6	14.6779	6.32206	conserved hypothetical protein	1	F:DNA binding	-	PF05225	helix-turn-helix, Psq domain
CPIJ020145	Y	X	0.0119016	0.0129857	0.0115154	1.12768	489	152.91	336.09	6	4	1.72483	4.27517	glycerol kinase	4	F:glycerol kinase activity; P:carbohydrate metabolic process; P:glycerol-3-phosphate metabolic process; P:phosphorylation	EC:2.7.1.30	PF02782	FGGY family of carbohydrate kinases, C-terminal domain
CPIJ004569	Y	X	0.0119002	0.0122463	0.1767	0.0693056	1554	293.518	1260.48	61	15	47.0089	13.9911	conserved hypothetical protein	2	F:actin binding; C:plasma membrane	-
CPIJ003983	Y		0.0118965	0.0116783	0.0704367	0.165799	648	143.652	504.348	15	6	9.48105	5.51895	conserved hypothetical protein	0	-
CPIJ010089	Y	X	0.0118929	0.0130042	0.0104775	1.24116	336	83.7482	252.252	4	3	0.844167	3.15583	microfibril-associated glycoprotein 4	2	P:signal transduction; F:receptor binding	-	PF00147	Fibrinogen beta and gamma chains, C-terminal globular domain
CPIJ019541	Y	X	0.0118759	0.0127712	0.154272	0.0827835	327	74.3867	252.613	13	3	10.1473	2.8527	conserved hypothetical protein	1	F:structural constituent of cuticle	-	PF00379	Insect cuticle protein
CPIJ015634	Y	X	0.0118548	0.0124855	0.0588863	0.212027	591	169.23	421.77	14	5	9.15971	4.84029	isoform a	1	F:nucleic acid binding
CPIJ010311	Y	X	0.0118532	0.0118148	0.0670058	0.176325	534	112.172	421.828	12	5	7.21554	4.78446	aael014436- partial	1	F:transferase activity, transferring phosphorus-containing groups	-	PF02958	Ecdysteroid kinase
CPIJ016555	Y	X	0.0118044	0.0137516	0.0481256	0.285744	639	130.716	508.284	13	6	6.15791	6.84209	conserved hypothetical protein	7	F:metal ion binding; P:multicellular organismal development; P:protein ubiquitination; P:ubiquitin-dependent protein catabolic process; F:ubiquitin-protein ligase activity; C:nucleus; F:zinc ion binding	EC:6.3.2.19	PF03145	Seven in absentia protein family
CPIJ013279	Y		0.0118023	0.0117471	0.0549911	0.213618	561	137.353	423.647	12	5	7.23382	4.76618	conserved hypothetical protein	0	-		PF12248	Farnesoic acid 0-methyl transferase
CPIJ010658	Y	X	0.0117984	0.0128808	0.0475959	0.270628	2364	584.098	1779.9	49	21	26.8541	22.1459	kinesin motor protein	0	-
CPIJ016093	Y	X	0.0117974	0.0129628	0.0762307	0.170047	993	145.353	847.647	21	10	10.544	10.456	hypothetical conserved protein	0	-		PF09777	Osteopetrosis-associated transmembrane protein 1 precursor
CPIJ004984	Y	X	0.0117969	0.0126144	0.0846741	0.148975	783	189.626	593.374	23	7	15.6871	7.31289	serine protease1 2	2	F:serine-type endopeptidase activity; P:proteolysis	EC:3.4.21.0	PF00089	Trypsin
CPIJ019598	Y	X	0.0117946	0.0129501	0.13544	0.0956156	441	101.863	339.137	17	4	12.895	4.10496	basic endochitinase chb4	3	F:chitinase activity; P:chitin catabolic process; P:cell wall macromolecule catabolic process	EC:3.2.1.14	PF00182	Chitinase class I
CPIJ013294	Y	X	0.0117925	0.0118873	0.022398	0.53073	687	178.203	508.797	10	6	3.97564	6.02436	fibrinogen and fibronectin	2	P:signal transduction; F:receptor binding	-	PF00147	Fibrinogen beta and gamma chains, C-terminal globular domain
CPIJ801521	Y	X	0.0117819	0.0134208	0.188172	0.0713223	324	69.3725	254.627	15	3	11.8879	3.11207	low molecular weight protein-tyrosine-phosphatase	4	C:cytoplasm; F:non-membrane spanning protein tyrosine phosphatase activity; P:peptidyl-tyrosine dephosphorylation; F:acid phosphatase activity	EC:3.1.3.2	PF01451	Low molecular weight phosphotyrosine protein phosphatase
CPIJ014525	Y		0.0117745	0.011766	0.0903411	0.130239	411	71.284	339.716	10	4	6.17026	3.82974	odorant-binding protein	1	F:odorant binding	-	PF01395	PBP/GOBP family
CPIJ018336	Y	X	0.0117653	0.0119699	0.15398	0.0777369	606	96.0244	509.976	19	6	13.448	5.55203	zinc finger protein 845- partial	3	F:nucleic acid binding; C:intracellular; F:zinc ion binding	-	PF00096	Zinc finger, C2H2 type
CPIJ009819	Y	X	0.0117631	0.0144663	0.101931	0.141922	243	72.9772	170.023	9	2	6.7636	2.2364	hypothetical protein CpipJ_CPIJ009819	0	-
CPIJ802240	Y	X	0.0117574	0.0147708	0.11555	0.12783	864	183.579	680.421	30	8	20.3557	9.64431	juvenile hormone-inducible	1	F:transferase activity, transferring phosphorus-containing groups	-	PF02958	Ecdysteroid kinase
CPIJ016286	Y	X	0.0117523	0.0179524	0.143045	0.125501	2637	509.759	2127.24	104	25	68.254	35.746	conserved hypothetical protein	1	F:catalytic activity	-
CPIJ014187	Y	X	0.0117485	0.0124873	0.0461247	0.27073	768	172.178	595.822	15	7	7.7445	7.2555	conserved hypothetical protein	3	C:extracellular region; F:chitin binding; P:chitin metabolic process	-	PF01607	Chitin binding Peritrophin-A domain
CPIJ001424	Y	X	0.0117432	0.0147698	0.0707993	0.208615	432	91.3762	340.624	11	4	6.18792	4.81208	conserved hypothetical protein	7	F:metal ion binding; P:multicellular organismal development; P:protein ubiquitination; P:ubiquitin-dependent protein catabolic process; F:ubiquitin-protein ligase activity; C:nucleus; F:zinc ion binding	EC:6.3.2.19	PF03145	Seven in absentia protein family
CPIJ008852	Y	X	0.0117335	0.0162257	0.131461	0.123426	213	42.5479	170.452	8	2	5.35311	2.64689	maltose phosphorylase	2	F:catalytic activity; P:carbohydrate metabolic process	-	PF03632	Glycosyl hydrolase family 65 central catalytic domain
CPIJ016497	Y	X	0.0117291	0.0125034	0.0429901	0.290845	1680	401.129	1278.87	33	15	17.1227	15.8773	thrombospondin-4	3	C:extracellular region; P:cell adhesion; F:calcium ion binding	-	PF05735	Thrombospondin C-terminal region
CPIJ019859	Y		0.0117092	0.0117029	0.000234059	49.9998	222	51.1939	170.806	2	2	0.0119174	1.98808	zinc finger protein	0	-
CPIJ007831	Y	X	0.0116746	0.0126784	0.0506585	0.250272	561	132.72	428.28	12	5	6.63858	5.36142	conserved hypothetical protein	2	F:zinc ion binding; F:metal ion binding	-	PF13920	Zinc finger, C3HC4 type (RING finger)
CPIJ010990	Y	X	0.0116692	0.0124635	0.0663447	0.18786	1290	261.646	1028.35	29	12	16.6825	12.3175	pacifastin light chain	2	P:negative regulation of peptidase activity; F:peptidase inhibitor activity	-	PF05375	Pacifastin inhibitor (LCMII)
CPIJ017008	Y	X	0.0116679	0.0127537	0.108876	0.117139	357	99.8853	257.115	13	3	9.98826	3.01174	caspase-6	3	P:apoptotic process; P:proteolysis; F:cysteine-type endopeptidase activity	EC:3.4.22.0	PF00656	Caspase domain
CPIJ002954	Y		0.011639	0.0117072	0.158533	0.0738471	564	134.408	429.592	24	5	19.417	4.58299	conserved hypothetical protein	0	-
CPIJ009462	Y	X	0.0116259	0.0139635	0.168411	0.0829132	441	96.9405	344.059	20	4	15.4527	4.54732	thrombospondin	3	C:extracellular region; P:cell adhesion; F:calcium ion binding	-	PF02412	Thrombospondin type 3 repeat
CPIJ004979	Y	X	0.0116181	0.0145677	0.298094	0.0488696	543	112.638	430.362	34	5	28.6505	5.34955	atp-binding cassette sub-family a member 3	3	P:ATP catabolic process; F:ATP binding; F:ATPase activity	EC:3.6.1.3	PF00005	ABC transporter
CPIJ000537	Y	X	0.0116157	0.0129487	0.0356977	0.362731	702	185.456	516.544	13	6	6.46669	6.53331	conserved hypothetical protein	0	-
CPIJ010307	Y	X	0.0116002	0.0136672	0.016867	0.810296	711	193.769	517.231	10	6	3.16162	6.83838	juvenile hormone-inducible	1	F:transferase activity, transferring phosphorus-containing groups	-	PF02958	Ecdysteroid kinase
CPIJ010992	Y	X	0.0115878	0.0140499	0.0973863	0.144269	531	99.5105	431.489	15	5	9.22754	5.77246	conserved hypothetical protein	0	-
CPIJ004568	Y	X	0.0115549	0.0125148	0.177811	0.0703825	336	76.3703	259.63	15	3	12.1039	2.89613	copper chaperone for superoxide dismutase	5	P:metal ion transport; F:metal ion binding; P:superoxide metabolic process; F:superoxide dismutase activity; P:oxidation-reduction process	EC:1.15.1.1	PF00080	Copper/zinc superoxide dismutase (SODC)
CPIJ802482	Y	X	0.0115497	0.0128103	0.0307364	0.41678	201	27.8355	173.164	3	2	0.835007	2.16499	conserved hypothetical protein	0	-		PF13855	Leucine rich repeat
CPIJ006184	Y	X	0.0115313	0.0133409	0.0545056	0.244762	798	190.956	607.044	18	7	10.1232	7.87679	zinc finger protein 34	2	C:nucleus; F:zinc ion binding	-	PF13894	C2H2-type zinc finger
CPIJ012156	Y	X	0.0115147	0.011875	0.0339176	0.350114	468	120.618	347.382	8	4	3.9834	4.0166	trypsin-1	2	F:serine-type endopeptidase activity; P:proteolysis	EC:3.4.21.0	PF00089	Trypsin
CPIJ015317	Y	X	0.0115099	0.0130061	0.0957326	0.135858	687	165.71	521.29	22	6	15.4128	6.58718	n-acetylglucosaminyl-phosphatidylinositol de-n-acetylase	0	-		PF02585	GlcNAc-PI de-N-acetylase
CPIJ009777	Y		0.0114895	0.0114444	0.0497011	0.230264	453	104.856	348.144	9	4	5.10053	3.89947	zinc finger protein 434	3	F:nucleic acid binding; C:intracellular; F:zinc ion binding	-	PF13894	C2H2-type zinc finger
CPIJ006389	Y	X	0.0114873	0.0182422	0.183535	0.0993936	690	80.6339	609.366	24	7	13.7054	10.2946	abl interactor 2	1	C:cytoplasm	-	PF07815	Abl-interactor HHR
CPIJ008762	Y	X	0.0114676	0.0137302	0.104113	0.131877	1575	354.166	1220.83	50	14	34.374	15.626	conserved hypothetical protein	1	F:transferase activity, transferring acyl groups other than amino-acyl groups	EC:2.3.1.0	PF01757	Acyltransferase family
CPIJ002725	Y	X	0.0114665	0.0123409	0.128203	0.0962601	528	91.9462	436.054	16	5	10.9851	5.01486	lipase 1	2	P:lipid catabolic process; F:hydrolase activity, acting on ester bonds	-	PF00561	alpha/beta hydrolase fold
CPIJ011624	Y	X	0.0114624	0.0121911	0.0149571	0.815072	237	62.5174	174.483	3	2	0.91608	2.08392	hypothetical protein CpipJ_CPIJ011624	0	-
CPIJ003386	Y	X	0.0114524	0.0147253	0.0784138	0.18779	222	47.3641	174.636	6	2	3.54526	2.45474	predicted protein	0	-		PF12799	Leucine Rich repeats (2 copies)
CPIJ012115	Y	X	0.0114436	0.0165197	0.156765	0.105378	306	43.8451	262.155	10	3	6.13471	3.86529	conserved hypothetical protein	0	-
CPIJ015589	Y		0.0114278	0.0100902	0.113062	0.0892448	522	84.4716	437.528	13	5	8.8904	4.1096	vacuolar protein sorting 18 (deep orange protein)	4	C:intracellular; P:vesicle-mediated transport; P:intracellular protein transport; F:zinc ion binding	-
CPIJ007742	Y	X	0.01142	0.0139329	0.125567	0.11096	783	170.039	612.961	28	7	20.0001	7.99985	kda secreted protein -1	0	-
CPIJ001994	Y	X	0.0114118	0.0132278	0.0563492	0.234747	981	279.974	701.026	24	8	15.1154	8.88458	conserved hypothetical protein	0	-		PF12937	F-box-like
CPIJ002338	Y	X	0.011409	0.0158157	0.0603309	0.262149	468	117.399	350.601	12	4	6.73066	5.26934	conserved hypothetical protein	0	-		PF03227	Gamma interferon inducible lysosomal thiol reductase (GILT)
CPIJ001005	Y	X	0.0114027	0.0126786	0.0276885	0.457902	210	34.6034	175.397	3	2	0.903342	2.09666	homeotic deformed protein	5	F:sequence-specific DNA binding transcription factor activity; F:sequence-specific DNA binding; P:multicellular organismal development; C:nucleus; P:regulation of transcription, DNA-dependent	-
CPIJ001469	Y	X	0.0114012	0.0127361	0.0233896	0.54452	504	65.449	438.551	7	5	1.50582	5.49418	serendipity locus protein delta	3	F:zinc ion binding; F:nucleic acid binding; C:intracellular	-	PF00096	Zinc finger, C2H2 type
CPIJ012346	Y		0.0113969	0.0104642	0.0473661	0.220921	381	117.77	263.23	8	3	5.35552	2.64448	conserved hypothetical protein	0	-
CPIJ009787	Y	X	0.0113909	0.0126654	0.08192	0.154608	3042	671.688	2370.31	81	27	52.4071	28.5929	zinc finger protein 582	3	F:zinc ion binding; F:nucleic acid binding; C:intracellular	-	PF13894	C2H2-type zinc finger
CPIJ801905	Y	X	0.0113831	0.015373	0.046769	0.328701	1224	257.653	966.347	26	11	11.6445	14.3555	aael017167- partial	4	P:neuropeptide signaling pathway; C:integral to membrane; C:plasma membrane; F:G-protein coupled receptor activity	-	PF00002	7 transmembrane receptor (Secretin family)
CPIJ004410	Y	X	0.0113733	0.0118488	0.0428898	0.276261	246	70.1503	175.85	5	2	2.95418	2.04582	cytochrome p450	6	F:heme binding; F:oxidoreductase activity, acting on paired donors, with incorporation or reduction of molecular oxygen; F:monooxygenase activity; F:iron ion binding; F:electron carrier activity; P:oxidation-reduction process	-	PF00067	Cytochrome P450
CPIJ018570	Y	X	0.0113666	0.014043	0.0998149	0.14069	1518	286.321	1231.68	44	14	27.4107	16.5893	alpha-amylase	3	P:carbohydrate metabolic process; F:cation binding; F:catalytic activity	-	PF00128	Alpha amylase, catalytic domain
CPIJ015242	Y		0.0113572	0.0116213	0.171375	0.0678122	351	86.8508	264.149	16	3	13.2643	2.7357	hypothetical protein CpipJ_CPIJ015242	0	-
CPIJ016923	Y		0.0113463	0.0115894	0.110119	0.105244	717	188.194	528.806	25	6	19.2942	5.70578	acetoin reductase	3	F:oxidoreductase activity; P:oxidation-reduction process; F:nucleotide binding	-	PF00106	short chain dehydrogenase
CPIJ020192	Y		0.0113455	0.0116178	0.027813	0.417711	249	72.7188	176.281	4	2	1.98748	2.01252	trypsin-like salivary secreted protein	2	F:serine-type endopeptidase activity; P:proteolysis	EC:3.4.21.0	PF00089	Trypsin
CPIJ008853	Y	X	0.0113277	0.0146275	0.077892	0.187792	591	149.603	441.397	17	5	10.939	6.061	maltose phosphorylase	2	F:catalytic activity; P:carbohydrate metabolic process	-	PF03632	Glycosyl hydrolase family 65 central catalytic domain
CPIJ014025	Y	X	0.0113272	0.0135801	0.0722794	0.187884	414	60.8681	353.132	9	4	4.30617	4.69383	frataxin	5	P:iron-sulfur cluster assembly; F:ferric iron binding; F:ferroxidase activity; C:mitochondrion; P:oxidation-reduction process	EC:1.16.3.1	PF01491	Frataxin-like domain
CPIJ800241	Y	X	0.0113143	0.014132	0.0342099	0.413096	1146	262.164	883.836	21	10	8.7768	12.2232	cytochrome p450 9b1	6	F:heme binding; F:oxidoreductase activity, acting on paired donors, with incorporation or reduction of molecular oxygen; F:monooxygenase activity; F:iron ion binding; F:electron carrier activity; P:oxidation-reduction process	-	PF00067	Cytochrome P450
CPIJ018632	Y		0.0113092	0.0116379	0.16774	0.0693803	663	132.458	530.542	27	6	21.1285	5.87149	glutathione-s-transferase gst	1	F:transferase activity	-	PF13417	Glutathione S-transferase, N-terminal domain
CPIJ005311	Y	X	0.0113039	0.0130256	0.0326911	0.398446	117	28.5346	88.4654	2	1	0.894736	1.10526	hypothetical protein CpipJ_CPIJ005311	0	-
CPIJ007016	Y	X	0.0113024	0.0124186	0.0633084	0.19616	789	169.662	619.338	18	7	10.4891	7.51091	serine protease serpin	3	F:serine-type endopeptidase inhibitor activity; P:proteolysis; F:peptidase activity	-	PF00079	Serpin (serine protease inhibitor)
CPIJ004652	Y	X	0.0112871	0.0117954	0.187819	0.0628018	450	95.6142	354.386	20	4	16.2236	3.77637	niemann-pick type c-	0	-		PF02221	ML domain
CPIJ014669	Y	X	0.0112841	0.0127214	0.0777014	0.163721	1593	440.937	1152.06	46	13	32.2182	13.7818	homeobox protein hox-b2a	4	F:sequence-specific DNA binding transcription factor activity; F:sequence-specific DNA binding; C:nucleus; P:regulation of transcription, DNA-dependent	-	PF00046	Homeobox domain
CPIJ019221	Y		0.011253	0.0114968	0.0693157	0.165861	120	31.135	88.865	3	1	2.03611	0.963892	hypothetical protein CpipJ_CPIJ019221	0	-
CPIJ014654	Y	X	0.0112251	0.0190916	0.0265147	0.720037	204	25.8277	178.172	4	2	0.670333	3.32967	coagulation factor xii	5	F:serine-type endopeptidase activity; F:RNA-directed DNA polymerase activity; P:RNA-dependent DNA replication; F:RNA binding; P:proteolysis	EC:3.4.21.0; EC:2.7.7.49	PF00089	Trypsin
CPIJ009785	Y		0.0111862	0.0112148	0.071319	0.157248	447	89.4152	357.585	10	4	6.13926	3.86074	conserved hypothetical protein	2	F:zinc ion binding; F:metal ion binding	-	PF00856	SET domain
CPIJ002370	Y		0.011184	0.0111783	0.000223567	50	261	82.1725	178.827	2	2	0.0182129	1.98179	hypothetical protein CpipJ_CPIJ002370	0	-
CPIJ005693	Y	X	0.0111386	0.0142142	0.168001	0.0846078	990	181.999	808.001	38	9	27.6238	10.3762	aael011139- partial	1	F:transferase activity, transferring acyl groups other than amino-acyl groups	EC:2.3.1.0	PF01757	Acyltransferase family
CPIJ009586	Y	X	0.0111211	0.012013	0.0107008	1.12263	435	75.3241	359.676	5	4	0.786091	4.21391	odorant-binding protein 14	1	F:odorant binding	-	PF01395	PBP/GOBP family
CPIJ002925	Y	X	0.0111164	0.0118092	0.0988686	0.119444	567	117.216	449.784	16	5	10.9714	5.02857	conserved hypothetical protein	0	-		PF12937	F-box-like
CPIJ004237	Y	X	0.0110939	0.0139218	0.125217	0.111181	984	172.747	811.253	31	9	20.3662	10.6338	conserved hypothetical protein	0	-		PF08585	Domain of unknown function (DUF1767)
CPIJ004602	Y		0.0110715	0.0104013	0.176734	0.058853	228	47.3562	180.644	9	2	7.34994	1.65006	serine 3-dehydrogenase	3	P:oxidation-reduction process; F:nucleotide binding; F:farnesol dehydrogenase activity	EC:1.1.1.216	PF00106	short chain dehydrogenase
CPIJ012354	Y	X	0.0110689	0.0119207	0.191362	0.0622939	345	73.9711	271.029	16	3	13.0267	2.97327	conserved hypothetical protein	1	F:nucleotide binding	-
CPIJ016759	Y	X	0.0110574	0.0132434	0.0187904	0.704799	222	41.1247	180.875	3	2	0.731732	2.26827	pol-like protein	3	F:RNA binding; P:RNA-dependent DNA replication; F:RNA-directed DNA polymerase activity
CPIJ006014	Y	X	0.0110519	0.013078	0.0690193	0.189483	579	126.591	452.409	14	5	8.34738	5.65262	serine protease	2	F:serine-type endopeptidase activity; P:proteolysis	EC:3.4.21.0	PF00089	Trypsin
CPIJ012340	Y	X	0.0110328	0.0139656	0.0497124	0.280927	573	119.807	453.193	12	5	5.81772	6.18228	conserved hypothetical protein	0	-
CPIJ011758	Y	X	0.0110328	0.0124924	0.116821	0.106936	969	243.887	725.113	35	8	26.5567	8.44331	embryonic polarity dorsal	3	F:sequence-specific DNA binding transcription factor activity; C:nucleus; P:regulation of transcription, DNA-dependent	-	PF00554	Rel homology domain (RHD)
CPIJ012873	Y	X	0.0110268	0.0127852	0.0399012	0.320421	252	70.6231	181.377	5	2	2.74285	2.25715	udp-glucuronosyltransferase 1-8	2	F:transferase activity, transferring hexosyl groups; P:metabolic process	EC:2.4.1.0	PF00201	UDP-glucoronosyl and UDP-glucosyl transferase
CPIJ019591	Y		0.0110197	0.0115388	0.0709886	0.162544	1401	402.791	998.209	39	11	27.8011	11.1989	solute carrier family 2	3	F:substrate-specific transmembrane transporter activity; C:integral to membrane; P:transmembrane transport	-	PF00083	Sugar (and other) transporter
CPIJ001327	Y		0.0110156	0.00788887	0.043583	0.181008	315	42.6595	272.34	4	3	1.85566	2.14434	conserved hypothetical protein	2	F:zinc ion binding; F:nucleic acid binding	-
CPIJ017837	Y	X	0.0110112	0.0158914	0.0594073	0.267499	816	180.283	635.717	20	7	10.292	9.70801	angiopoietin 2	2	P:signal transduction; F:receptor binding	-	PF00147	Fibrinogen beta and gamma chains, C-terminal globular domain
CPIJ000391	Y	X	0.0110022	0.0178337	0.0432313	0.412517	225	43.2194	181.781	5	2	1.82812	3.17188	conserved hypothetical protein	0	-
CPIJ015765	Y	X	0.0110018	0.0129712	0.087155	0.14883	1074	255.952	818.048	31	9	21.0073	9.99266	serine protease	2	F:serine-type endopeptidase activity; P:proteolysis	EC:3.4.21.0	PF00089	Trypsin
CPIJ801757	Y		0.0109937	0.0116587	0.014677	0.794354	2214	485.726	1728.27	27	19	7.05623	19.9438	3 -5 exonuclease	4	F:nucleic acid binding; F:3'-5' exonuclease activity; C:intracellular; P:nucleobase-containing compound metabolic process	-	PF01612	3'-5' exonuclease
CPIJ008879	Y		0.0109848	0.0113409	0.135443	0.0837316	336	62.8954	273.105	11	3	8.067	2.933	aaa atpase	2	F:nucleoside-triphosphatase activity; F:ATP binding	EC:3.6.1.15	PF00004	ATPase family associated with various cellular activities (AAA)
CPIJ010748	Y		0.0109815	0.0111013	0.0944699	0.117512	411	46.7513	364.249	8	4	4.17633	3.82367	conserved hypothetical protein	0	-
CPIJ006585	Y		0.0109792	0.0107775	0.0699899	0.153987	333	59.7554	273.245	7	3	4.10765	2.89235	glycoprotein	4	F:chitinase activity; P:carbohydrate metabolic process; P:chitin catabolic process; F:cation binding	EC:3.2.1.14	PF00704	Glycosyl hydrolases family 18
CPIJ003033	Y	X	0.0109784	0.0126088	0.084644	0.148963	459	94.6469	364.353	12	4	7.62656	4.37344	larval cuticle protein a2b	1	F:structural constituent of cuticle	-	PF00379	Insect cuticle protein
CPIJ006741	Y	X	0.0109566	0.0130698	0.0488309	0.267655	267	84.4605	182.539	6	2	3.80116	2.19884	40s ribosomal protein s14	3	C:ribosome; F:structural constituent of ribosome; P:translation	-
CPIJ012712	Y		0.0109536	0.0115199	0.018149	0.634738	237	54.4118	182.588	3	2	0.958475	2.04152	serine protease	2	F:serine-type endopeptidase activity; P:proteolysis	EC:3.4.21.0	PF00089	Trypsin
CPIJ004496	Y		0.010951	0.0117047	0.118107	0.0991026	357	83.0535	273.947	12	3	9.04375	2.95625	protostome-specific isoform b	3	F:Rho guanyl-nucleotide exchange factor activity; P:regulation of Rho protein signal transduction; C:intracellular		PF00168	C2 domain
CPIJ002109	Y	X	0.0109483	0.016195	0.0776196	0.208646	258	75.3233	182.677	8	2	5.31203	2.68797	odorant-binding protein	1	F:odorant binding	-	PF01395	PBP/GOBP family
CPIJ005736	Y		0.0109462	0.0106342	0.105736	0.100574	348	73.9333	274.067	10	3	7.28427	2.71573	conserved hypothetical protein	0	-
CPIJ006840	Y	X	0.0109442	0.0126104	0.0385344	0.327251	411	136.882	274.118	8	3	4.83282	3.16718	cd109 antigen	3	C:extracellular space; F:endopeptidase inhibitor activity; P:negative regulation of endopeptidase activity	-	PF07703	Alpha-2-macroglobulin family N-terminal region
CPIJ801819	Y	X	0.0109137	0.0126425	0.115761	0.109212	516	149.488	366.512	20	4	15.7758	4.22421	anopheles gambiae pest agap012679-pa	0	-
CPIJ001810	Y		0.0109132	0.0117236	0.0807107	0.145254	909	175.942	733.058	22	8	13.7055	8.29455	cytochrome p450	6	F:heme binding; F:oxidoreductase activity, acting on paired donors, with incorporation or reduction of molecular oxygen; F:monooxygenase activity; F:iron ion binding; F:electron carrier activity; P:oxidation-reduction process	-	PF00067	Cytochrome P450
CPIJ002296	Y		0.0109008	0.0110958	0.114156	0.0971989	372	96.7898	275.21	13	3	10.1851	2.81489	sugar transporter	4	F:substrate-specific transmembrane transporter activity; C:integral to membrane; P:transmembrane transport; P:carbohydrate transport	-	PF00083	Sugar (and other) transporter
CPIJ001827	Y		0.010896	0.0117145	0.0278153	0.421154	2130	478.02	1651.98	32	18	13.0322	18.9678	conserved hypothetical protein	1	F:nucleotide binding	-
CPIJ005851	Y		0.0108458	0.0112261	0.13657	0.0822004	369	92.3963	276.604	14	3	11.2352	2.76477	conserved hypothetical protein	3	C:membrane; F:extracellular ligand-gated ion channel activity; P:transport	-
CPIJ017378	Y		0.0108454	0.0111883	0.0595494	0.187883	375	98.3857	276.614	8	3	5.23478	2.76522	conserved hypothetical protein	0	-
CPIJ010317	Y	X	0.0108267	0.0128553	0.0847461	0.151692	225	40.2722	184.728	5	2	2.94844	2.05156	conserved hypothetical protein	1	F:transferase activity, transferring phosphorus-containing groups	-	PF02958	Ecdysteroid kinase
CPIJ012588	Y		0.0108227	0.0111681	0.0466983	0.239155	819	172.213	646.787	15	7	7.9022	7.0978	zinc finger protein	3	F:nucleic acid binding; C:nucleus; F:zinc ion binding	-	PF00096	Zinc finger, C2H2 type
CPIJ015271	Y		0.0108215	0.0110644	0.065097	0.169968	486	116.367	369.633	11	4	7.14336	3.85664	zinc finger protein 232	3	F:nucleic acid binding; C:intracellular; F:zinc ion binding	-	PF13465	Zinc-finger double domain
CPIJ006637	Y		0.0108183	0.0103753	0.0559409	0.18547	225	40.1282	184.872	4	2	2.15696	1.84304	conserved hypothetical protein	2	F:zinc ion binding; F:metal ion binding	-	PF01753	MYND finger
CPIJ006402	Y	X	0.0107816	0.0140524	0.0991661	0.141706	588	124.248	463.752	18	5	11.7731	6.22691	conserved hypothetical protein	0	-		PF12937	F-box-like
CPIJ006915	Y	X	0.0107805	0.0129694	0.0608818	0.213027	978	235.919	742.081	23	8	13.7718	9.22816	translation initiation factor delta subunit	2	P:translational initiation; F:translation initiation factor activity	-	PF01008	Initiation factor 2 subunit family
CPIJ016073	Y	X	0.0107504	0.015991	0.0872326	0.183314	570	197.921	372.079	20	4	14.8741	5.12589	conserved hypothetical protein	0	-
CPIJ013759	Y		0.0106995	0.010941	0.00021882	50	234	47.0759	186.924	2	2	0.0100233	1.98998	nonmuscle myosin heavy chain-a	0	-
CPIJ014995	Y		0.0106944	0.0100031	0.0836018	0.119651	255	67.9868	187.013	7	2	5.26661	1.73339	initiator caspase	2	P:proteolysis; F:cysteine-type endopeptidase activity	EC:3.4.22.0
CPIJ801875	Y	X	0.01068	0.0123304	0.174827	0.0705291	1032	189.305	842.695	40	9	30.4423	9.55771	tubulin-specific chaperone c	1	P:cell morphogenesis	-	PF07986	Tubulin binding cofactor C
CPIJ014179	Y	X	0.0106778	0.0118094	0.0869669	0.135792	597	128.74	468.26	16	5	10.7102	5.28984	af373879_1peritrophin-like protein 1	3	C:extracellular region; F:chitin binding; P:chitin metabolic process	-
CPIJ015206	Y		0.0106572	0.0106761	0.0192739	0.553916	246	58.3329	187.667	3	2	1.07834	1.92166	zinc finger protein 59	3	C:nucleus; F:zinc ion binding; P:intracellular signal transduction	-	PF07776	Zinc-finger associated domain (zf-AD)
CPIJ001986	Y	X	0.0106544	0.0124772	0.0943615	0.132228	720	156.851	563.149	21	6	14.2398	6.76022	zinc finger protein 557	3	F:nucleic acid binding; C:nucleus; F:zinc ion binding	-	PF07776	Zinc-finger associated domain (zf-AD)
CPIJ002756	Y	X	0.0106539	0.0137007	0.0371509	0.368785	657	187.689	469.311	13	5	6.76332	6.23668	cellular tumor antigen p53	5	F:transcription regulatory region DNA binding; P:apoptotic process; P:regulation of transcription, DNA-dependent; F:sequence-specific DNA binding transcription factor activity; C:nucleus	-	PF00870	P53 DNA-binding domain
CPIJ802218	Y	X	0.0106507	0.0123878	0.0682925	0.181394	1413	380.197	1032.8	37	11	24.7864	12.2136	adenylate cyclase	2	P:transmembrane transport; C:integral to membrane	-	PF07690	Major Facilitator Superfamily
CPIJ005855	Y	X	0.0106497	0.0148656	0.0812436	0.182976	960	208.805	751.195	27	8	16.282	10.718	zinc finger protein	3	F:nucleic acid binding; C:nucleus; F:zinc ion binding	-	PF13894	C2H2-type zinc finger
CPIJ008375	Y	X	0.0106424	0.0146675	0.0683814	0.214495	762	198.215	563.785	21	6	13.0428	7.95723	arrestin domain-containing protein 2	0	-		PF02752	Arrestin (or S-antigen), C-terminal domain
CPIJ009061	Y		0.0106416	0.0114407	0.0521865	0.219228	894	236.204	657.796	19	7	11.7974	7.20256	mannan-binding lectin serine protease 2	2	F:serine-type endopeptidase activity; P:proteolysis	EC:3.4.21.0	PF00089	Trypsin
CPIJ800090	Y		0.0106299	0.01163	0.0516291	0.22526	678	113.552	564.448	12	6	5.6611	6.3389	d7 protein	1	F:odorant binding	-	PF01395	PBP/GOBP family
CPIJ018074	Y		0.0106219	0.0110332	0.135021	0.0817152	231	42.7086	188.291	7	2	5.14607	1.85393	low quality protein: zinc finger protein xfin-like	3	F:nucleic acid binding; C:nucleus; F:zinc ion binding	-	PF07776	Zinc-finger associated domain (zf-AD)
CPIJ010320	Y	X	0.0106188	0.0120205	0.038784	0.309934	864	204.791	659.209	15	7	7.50881	7.49119	conserved hypothetical protein	1	F:transferase activity, transferring phosphorus-containing groups	-	PF02958	Ecdysteroid kinase
CPIJ006228	Y		0.010613	0.0108416	0.000217389	49.8721	234	45.5523	188.448	2	2	0.009647	1.99035	aael006148- partial	3	F:metallopeptidase activity; C:proteinaceous extracellular matrix; F:zinc ion binding	-
CPIJ009632	Y		0.0106043	0.0102802	0.0651599	0.157769	834	173.892	660.108	17	7	10.6323	6.36771	zinc finger protein 177	3	F:nucleic acid binding; C:nucleus; F:zinc ion binding	-	PF07776	Zinc-finger associated domain (zf-AD)
CPIJ800076	Y		0.0105972	0.0104963	0.0597544	0.175657	264	75.2711	188.729	6	2	4.16542	1.83458	small calcium-binding mitochondrial carrier	2	P:transmembrane transport; C:integral to membrane	-
CPIJ018218	Y		0.0105963	0.0115723	0.0156912	0.737502	729	162.766	566.234	9	6	2.52409	6.47591	transcription factor hamlet	6	F:nucleic acid binding; C:intracellular; F:kinase activity; P:phosphorylation; F:ATP binding; F:zinc ion binding	-	PF13894	C2H2-type zinc finger
CPIJ015108	Y		0.0105914	0.0103874	0.089296	0.116326	738	171.503	566.497	20	6	14.4484	5.55163	loc100145147 protein	2	P:DNA repair; C:nucleus	-	PF09302	XLF (XRCC4-like factor)
CPIJ005211	Y	X	0.0105839	0.014658	0.0655733	0.223536	966	210.135	755.865	24	8	13.3033	10.6967	alpha-amylase 2	3	P:carbohydrate metabolic process; F:cation binding; F:catalytic activity	-	PF00128	Alpha amylase, catalytic domain
CPIJ013043	Y	X	0.0105781	0.017445	0.147171	0.118536	252	62.9312	189.069	11	2	8.11134	2.88866	chymotrypsin a	2	F:serine-type endopeptidase activity; P:proteolysis	EC:3.4.21.0	PF00089	Trypsin
CPIJ019681		X	0.0105702	0.0117826	0.0997493	0.118122	852	189.759	662.241	25	7	17.7024	7.29757	juvenile hormone-inducible protein	1	F:transferase activity, transferring phosphorus-containing groups	-	PF02958	Ecdysteroid kinase
CPIJ001798		X	0.0105673	0.0143599	0.0489353	0.293447	867	204.577	662.423	19	7	9.74266	9.25734	complement component 2 factor b variant 2	2	F:serine-type endopeptidase activity; P:proteolysis	EC:3.4.21.0	PF00089	Trypsin
CPIJ010567		X	0.0105518	0.0120311	0.0420968	0.285797	465	85.9195	379.081	8	4	3.53834	4.46166	conserved hypothetical protein	0	-		PF07165	Protein of unknown function (DUF1397)
CPIJ802392			0.0105393	0.0114462	0.0849455	0.134747	2745	657.567	2087.43	76	22	53.2305	22.7695	aael003699- partial	0	-
CPIJ006676			0.0105384	0.010771	0.0997912	0.107936	492	112.436	379.564	14	4	10.2611	3.73888	conserved hypothetical protein	1	F:transferase activity, transferring acyl groups other than amino-acyl groups	EC:2.3.1.0	PF01757	Acyltransferase family
CPIJ003630			0.0105168	0.0109489	0.0536294	0.204159	1080	224.229	855.771	21	9	11.8032	9.19677	elastase-2A	2	F:serine-type endopeptidase activity; P:proteolysis	EC:3.4.21.0	PF00089	Trypsin
CPIJ005881			0.0104981	0.0101637	0.197965	0.051341	237	46.4898	190.51	10	2	8.2618	1.7382	conserved hypothetical protein	0	-
CPIJ013623			0.0104977	0.0112346	0.0860224	0.130601	1419	275.895	1143.11	35	12	22.7108	12.2892	urokinase-type plasminogen activator	4	F:kinase activity; P:phosphorylation; P:proteolysis; F:serine-type endopeptidase activity	EC:3.4.21.0	PF00089	Trypsin
CPIJ801998			0.0104703	0.0101365	0.13928	0.0727781	342	55.4761	286.524	10	3	7.26804	2.73196	chemosensory protein 1	2	F:kinase activity; P:phosphorylation	-	PF03392	Insect pheromone-binding family, A10/OS-D
CPIJ005324		X	0.0104628	0.0121398	0.137201	0.0884818	1224	268.231	955.769	45	10	34.2132	10.7868	udp-glucuronosyltransferase 2b18	2	F:transferase activity, transferring hexosyl groups; P:metabolic process	EC:2.4.1.0	PF00201	UDP-glucoronosyl and UDP-glucosyl transferase
CPIJ002166			0.010457	0.0103693	0.0844453	0.122793	732	158.221	573.779	18	6	12.4541	5.54585	conserved hypothetical protein	5	P:regulation of transcription, DNA-dependent; C:transcription factor TFIID complex; P:DNA-dependent transcription, initiation; F:protein heterodimerization activity; F:sequence-specific DNA binding transcription factor activity
CPIJ016348			0.0104472	0.0109829	0.13154	0.0834948	516	133.121	382.879	20	4	16.1272	3.87285	late trypsin	2	F:serine-type endopeptidase activity; P:proteolysis	EC:3.4.21.0	PF00089	Trypsin
CPIJ013662			0.0104447	0.00952867	0.095841	0.0994217	255	63.5146	191.485	7	2	5.3857	1.6143	conserved hypothetical protein	4	P:oxidation-reduction process; F:oxidoreductase activity; P:metabolic process; F:nucleotide binding
CPIJ007011		X	0.0104411	0.0134161	0.0623879	0.215044	906	139.8	766.2	19	8	8.72124	10.2788	thump domain-containing protein 1	1	F:RNA binding	-	PF02926	THUMP domain
CPIJ011383		X	0.0104384	0.0122574	0.0391942	0.312735	759	184.201	574.799	14	6	7.08543	6.91457	serine-type enodpeptidase	2	F:serine-type endopeptidase activity; P:proteolysis	EC:3.4.21.0	PF00089	Trypsin
CPIJ009862			0.0104363	0.0105091	0.040167	0.261634	243	51.3615	191.639	4	2	2.02408	1.97592	conserved hypothetical protein	4	F:DNA binding; F:DNA ligase (ATP) activity; P:DNA recombination; P:DNA repair	EC:6.5.1.1	PF04675	DNA ligase N terminus
CPIJ013147			0.0104286	0.0109879	0.106278	0.103388	219	27.2187	191.781	5	2	2.89274	2.10726	lrr47 protein	0	-		PF13855	Leucine rich repeat
CPIJ002263			0.010428	0.0107389	0.00021749	49.3765	264	72.2079	191.792	2	2	0.0151344	1.98487	conserved hypothetical protein	2	F:zinc ion binding; F:metal ion binding	-	PF12937	F-box-like
CPIJ016278		X	0.0104146	0.0130355	0.0894259	0.145768	852	179.865	672.135	24	7	15.5368	8.4632	low quality protein: radial spoke head protein 4 homolog a-like	0	-		PF04712	Radial spokehead-like protein
CPIJ001978		X	0.0104063	0.0123688	0.0707058	0.174934	507	122.618	384.382	13	4	8.39587	4.60413	cold shock y-box protein	2	F:DNA binding; P:regulation of transcription, DNA-dependent	-	PF00313	'Cold-shock' DNA-binding domain
CPIJ010624			0.01039	0.0108261	0.000216523	50	261	68.5078	192.492	2	2	0.0141353	1.98586	hypothetical protein CpipJ_CPIJ010624	0	-
CPIJ012931			0.0103871	0.0105006	0.111529	0.0941505	612	130.633	481.367	18	5	13.3637	4.63631	a chain crystal structure of mosquito arylalkylamine n-acetyltransferase like 5b	1	F:N-acetyltransferase activity	-	PF00583	Acetyltransferase (GNAT) family
CPIJ015200			0.0103846	0.0102967	0.0401889	0.256208	762	184.222	577.778	13	6	7.20801	5.79199	zinc finger protein gfi-1	3	F:nucleic acid binding; C:nucleus; F:zinc ion binding	-	PF07776	Zinc-finger associated domain (zf-AD)
CPIJ006525			0.0103843	0.0103616	0.113478	0.091309	261	68.4007	192.599	9	2	7.15932	1.84068	conserved hypothetical protein	0	-
CPIJ002668			0.0103624	0.0103811	0.084445	0.122933	585	102.485	482.515	13	5	8.23414	4.76586	hypothetical protein CpipJ_CPIJ002668	0	-
CPIJ006849			0.0103586	0.0116011	0.04576	0.253521	348	58.3851	289.615	6	3	2.65772	3.34228	aael005363- partial	2	F:transferase activity, transferring glycosyl groups; C:membrane	-	PF02434	Fringe-like
CPIJ018104			0.0103213	0.0107394	0.0380727	0.282077	372	81.3391	290.661	6	3	2.98807	3.01193	zinc finger and scan domain-containing protein 12	3	F:zinc ion binding; F:nucleic acid binding; C:intracellular	-	PF13465	Zinc-finger double domain
CPIJ802497			0.0103159	0.0101521	0.058542	0.173415	234	40.1237	193.876	4	2	2.17635	1.82365	conserved hypothetical protein	7	F:metal ion binding; P:proteolysis; F:metallopeptidase activity; F:hydrolase activity; F:zinc ion binding; F:peptidase activity; F:metalloendopeptidase activity		PF13855	Leucine rich repeat
CPIJ002401			0.0103118	0.0103485	0.0898755	0.115142	1071	198.21	872.79	25	9	16.5891	8.41089	conserved hypothetical protein	0	-
CPIJ005522		X	0.0102994	0.013122	0.0955736	0.137298	1086	212.163	873.837	30	9	19.1633	10.8367	conserved hypothetical protein	0	-
CPIJ008790			0.0102978	0.0110991	0.0815898	0.136036	258	63.7828	194.217	7	2	4.9497	2.0503	asparagine synthetase	2	F:asparagine synthase (glutamine-hydrolyzing) activity; P:asparagine biosynthetic process	EC:6.3.5.4	PF00733	Asparagine synthase
CPIJ005432			0.0102901	0.011314	0.146952	0.0769911	786	202.918	583.082	33	6	27.0219	5.97812	nad-dependent methanol dehydrogenase	10	F:hydroxyacid-oxoacid transhydrogenase activity; F:hydrolase activity, hydrolyzing O-glycosyl compounds; F:metal ion binding; P:carbohydrate metabolic process; P:molecular hydrogen transport; F:chitin binding; C:extracellular region; P:chitin metabolic process; C:mitochondrion; P:oxidation-reduction process	EC:1.1.99.24; EC:3.2.1.0	PF00465	Iron-containing alcohol dehydrogenase
CPIJ001104			0.0102864	0.01054	0.00690174	1.52716	534	145.137	388.863	5	4	0.981996	4.018	conserved hypothetical protein	0	-		PF00646	F-box domain
CPIJ017471			0.0102751	0.0101319	0.0655644	0.154533	615	128.385	486.615	13	5	8.19816	4.80184	hypothetical protein CpipJ_CPIJ017471	0	-		PF07165	Protein of unknown function (DUF1397)
CPIJ013140			0.0102722	0.0109675	0.123005	0.0891633	1020	143.847	876.153	25	9	16.2013	8.79868	phosphatase 1 binding protein	0	-		PF03370	Putative phosphatase regulatory subunit
CPIJ011861		X	0.0102676	0.0129003	0.110287	0.11697	585	98.0312	486.969	16	5	10.1199	5.88014	zinc finger protein	3	F:zinc ion binding; F:nucleic acid binding; C:intracellular	-	PF13465	Zinc-finger double domain
CPIJ004732			0.0102644	0.00935515	0.118711	0.0788061	474	84.3041	389.696	13	4	9.52883	3.47117	conserved hypothetical protein	3	C:extracellular region; F:chitin binding; P:chitin metabolic process	-	PF01607	Chitin binding Peritrophin-A domain
CPIJ007861			0.0102589	0.0109032	0.148555	0.073395	462	72.095	389.905	14	4	10.0219	3.97806	zinc finger protein 425	3	F:nucleic acid binding; C:nucleus; F:zinc ion binding	-	PF12874	Zinc-finger of C2H2 type
CPIJ000312			0.0102488	0.0104616	0.0511796	0.204409	492	101.71	390.29	9	4	5.04378	3.95622	toll-like receptor	0	-		PF13855	Leucine rich repeat
CPIJ007757			0.0102428	0.0107696	0.0720738	0.149424	636	147.851	488.149	15	5	10.0446	4.95542	conserved hypothetical protein	0	-
CPIJ020027			0.0102402	0.0099719	0.117499	0.0848676	255	59.6908	195.309	8	2	6.26131	1.73869	hypothetical protein CpipJ_CPIJ020027	0	-
CPIJ017420			0.0102255	0.0109134	0.0378317	0.288472	951	266.434	684.566	17	7	9.76344	7.23656	conserved hypothetical protein	2	F:oxidoreductase activity; P:oxidation-reduction process	-	PF13450	NAD(P)-binding Rossmann-like domain
CPIJ002828			0.010198	0.0100784	0.144217	0.0698834	822	135.594	686.406	24	7	17.7283	6.27167	conserved hypothetical protein	2	F:zinc ion binding; F:metal ion binding	-	PF01753	MYND finger
CPIJ007816			0.0101867	0.00849349	0.0623543	0.136213	582	189.33	392.67	14	4	10.9161	3.08387	SGS1	0	-
CPIJ001243			0.0101808	0.0109711	0.0776962	0.141205	1011	225.209	785.791	25	8	16.7483	8.25168	conserved hypothetical protein	4	P:oxidation-reduction process; F:methyltransferase activity; P:methylation; F:oxidoreductase activity, acting on paired donors, with incorporation or reduction of molecular oxygen, 2-oxoglutarate as one donor, and incorporation of one atom each of oxygen into both donors	EC:2.1.1.0; EC:1.14.11.0	PF08241	Methyltransferase domain
CPIJ018737			0.0101667	0.0101199	0.0357341	0.2832	744	153.84	590.16	11	6	5.27222	5.72778	serine protease	2	F:serine-type endopeptidase activity; P:proteolysis	EC:3.4.21.0	PF00089	Trypsin
CPIJ000769			0.0101602	0.0098752	0.0468155	0.210939	795	204.459	590.541	15	6	9.32108	5.67892	trypsin ii-p29	2	F:serine-type endopeptidase activity; P:proteolysis	EC:3.4.21.0	PF00089	Trypsin
CPIJ016477			0.0101592	0.0101333	0.000202666	50	222	25.134	196.866	2	2	0.00509382	1.99491	hypothetical protein CpipJ_CPIJ016477	0	-
CPIJ008477			0.0101438	0.0103312	0.182024	0.0567575	714	122.508	591.492	26	6	20.4076	5.59241	acyl- -binding domain-containing protein 6	3	F:fatty-acyl-CoA binding; P:proteolysis; F:aspartic-type endopeptidase activity	EC:3.4.23.0	PF00887	Acyl CoA binding protein
CPIJ012585			0.0101367	0.00962397	0.100825	0.0954518	486	91.3929	394.607	11	4	7.78964	3.21036	znf235 protein	3	F:nucleic acid binding; C:nucleus; F:zinc ion binding	-	PF00096	Zinc finger, C2H2 type
CPIJ005766			0.0101252	0.0114392	0.0903409	0.126622	2028	447.788	1580.21	56	16	38.705	17.295	conserved hypothetical protein	0	-
CPIJ005698			0.0101231	0.0111605	0.0785216	0.142133	261	63.4329	197.567	7	2	4.85206	2.14794	n-acetyl galactosaminyl transferase	4	F:transferase activity, transferring glycosyl groups; C:Golgi apparatus; P:protein glycosylation; C:integral to membrane	-	PF00652	Ricin-type beta-trefoil lectin domain
CPIJ019488			0.010108	0.0100054	0.0424519	0.235687	375	78.2049	296.795	6	3	3.16714	2.83286	organic cation transporter	3	C:integral to membrane; P:transmembrane transport; F:transmembrane transporter activity	-	PF00083	Sugar (and other) transporter
CPIJ801581			0.0101014	0.010572	0.00767974	1.37661	507	111.016	395.984	5	4	0.84599	4.15401	---NA---	0	-
CPIJ007544		X	0.0101005	0.0156676	0.0758557	0.206545	483	86.9806	396.019	12	4	6.18432	5.81568	conserved hypothetical protein	2	F:zinc ion binding; F:metal ion binding	-	PF00856	SET domain
CPIJ800228			0.0100774	0.0111773	0.102378	0.109176	1593	402.223	1190.78	50	12	37.7867	12.2133	cytochrome p450	6	F:heme binding; F:oxidoreductase activity, acting on paired donors, with incorporation or reduction of molecular oxygen; F:monooxygenase activity; F:iron ion binding; F:electron carrier activity; P:oxidation-reduction process	-	PF00067	Cytochrome P450
CPIJ013162			0.0100646	0.00980547	0.134266	0.0730302	237	38.2833	198.717	7	2	5.07586	1.92414	aael002763- partial	1	F:binding	-
CPIJ014212			0.0100635	0.0106396	0.120646	0.0881883	714	117.788	596.212	19	6	13.1362	5.86381	zinc finger protein xfin-like	3	F:zinc ion binding; F:nucleic acid binding; C:intracellular	-	PF13894	C2H2-type zinc finger
CPIJ004699			0.0100591	0.0104517	0.0675527	0.154719	474	76.3503	397.65	9	4	4.98391	4.01609	conserved hypothetical protein	3	C:integral to membrane; P:cell adhesion; P:tissue regeneration	-	PF04923	Ninjurin
CPIJ016468			0.0100434	0.00941582	0.221616	0.042487	231	31.864	199.136	7	2	5.5313	1.4687	high affinity copper transporter	3	P:copper ion transmembrane transport; C:integral to membrane; F:copper ion transmembrane transporter activity	-	PF04145	Ctr copper transporter family
CPIJ009505			0.010034	0.011179	0.128867	0.0867479	1815	320.094	1494.91	55	15	39.1422	15.8578	conserved hypothetical protein	0	-
CPIJ003560			0.0100322	0.0101506	0.138991	0.0730306	501	102.283	398.717	17	4	13.2328	3.76718	programmed cell death protein 7	0	-
CPIJ009406			0.010012	0.0101436	0.135359	0.0749389	882	182.841	699.159	30	7	23.3181	6.68192	leucine rich protein	0	-		PF13855	Leucine rich repeat
CPIJ006195			0.0100105	0.00990597	0.0284902	0.347697	408	108.316	299.684	6	3	3.05812	2.94188	hypothetical protein CpipJ_CPIJ006195	0	-
CPIJ000703			0.0100072	0.010788	0.0116787	0.923735	273	73.1439	199.856	3	2	0.851309	2.14869	conserved hypothetical protein	0	-
CPIJ802239			0.00998606	0.011099	0.0955017	0.116218	2712	508.927	2203.07	70	22	46.5707	23.4293	conserved hypothetical protein	1	F:transferase activity, transferring phosphorus-containing groups
CPIJ010044			0.00998012	0.0099351	0.0743574	0.133613	630	129.004	500.996	14	5	9.21724	4.78276	importin beta-3	3	C:nuclear pore; P:intracellular protein transport; F:protein transporter activity
CPIJ001473			0.00997343	0.00959182	0.135084	0.0710061	840	138.135	701.865	23	7	16.902	6.09796	zinc finger protein 449	3	F:zinc ion binding; F:nucleic acid binding; C:intracellular	-	PF00096	Zinc finger, C2H2 type
CPIJ003613			0.00996677	0.0111403	0.140041	0.07955	1143	239.999	903.001	41	9	31.5552	9.44476	beta- -glucan-binding protein	2	P:carbohydrate metabolic process; F:hydrolase activity, hydrolyzing O-glycosyl compounds	EC:3.2.1.0	PF00722	Glycosyl hydrolases family 16
CPIJ016055			0.00995996	0.0113223	0.0429711	0.263485	666	163.99	502.01	12	5	6.64237	5.35763	zinc finger protein 206 3	2	F:zinc ion binding; C:nucleus	-	PF07776	Zinc-finger associated domain (zf-AD)
CPIJ800261			0.00994514	0.0106061	0.167301	0.0633956	750	146.69	603.31	28	6	22.2093	5.79074	cytochrome p450 4d1	6	F:heme binding; F:oxidoreductase activity, acting on paired donors, with incorporation or reduction of molecular oxygen; F:monooxygenase activity; F:iron ion binding; F:electron carrier activity; P:oxidation-reduction process	-	PF00067	Cytochrome P450
CPIJ008867		X	0.00991886	0.0121703	0.0603864	0.201541	516	112.728	403.272	11	4	6.39168	4.60832	conserved hypothetical protein	1	F:odorant binding
CPIJ012978			0.00990953	0.00951292	0.178217	0.0533785	234	32.174	201.826	7	2	5.24407	1.75593	pecanex-like protein 1-like	1	C:integral to membrane
CPIJ015479			0.00988977	0.0113568	0.0282266	0.402343	1059	250.083	808.917	16	8	6.95223	9.04777	ppargamma constitutive coactivator 1	0	-
CPIJ008207			0.0098891	0.0105069	0.150097	0.0700007	660	154.393	505.607	26	5	21.1513	4.84871	ornithine cyclodeaminase	1	F:nucleotide binding	-	PF02423	Ornithine cyclodeaminase/mu-crystallin family
CPIJ016527			0.00983566	0.0117167	0.102746	0.114036	732	121.975	610.025	18	6	11.4627	6.53734	conserved hypothetical protein	1	F:zinc ion binding		PF12937	F-box-like
CPIJ801715			0.00983378	0.00970699	0.27029	0.0359133	345	39.9294	305.071	11	3	8.6316	2.3684	odorant-binding protein 56a	1	F:odorant binding	-	PF01395	PBP/GOBP family
CPIJ002939			0.00982311	0.0110474	0.0468937	0.235584	555	147.797	407.203	11	4	6.67042	4.32958	anopheles gambiae pest agap012881-pa	4	F:metal ion binding; F:metalloendopeptidase activity; P:proteolysis; F:zinc ion binding	EC:3.4.24.0	PF01400	Astacin (Peptidase family M12A)
CPIJ008290			0.00982065	0.0117335	0.0451504	0.259877	501	93.6948	407.305	9	4	4.2259	4.7741	zinc finger protein 595	3	F:nucleic acid binding; C:intracellular; F:zinc ion binding	-	PF13465	Zinc-finger double domain
CPIJ004300			0.009816	0.00988546	0.0176524	0.560007	264	60.2514	203.749	3	2	1.03672	1.96328	conserved hypothetical protein	0	-		PF11069	Protein of unknown function (DUF2870)
CPIJ802116			0.00981162	0.0103026	0.0292675	0.352016	2067	538.202	1528.8	31	15	15.5006	15.4994	spermatogenesis associated factor	2	F:nucleoside-triphosphatase activity; F:ATP binding	EC:3.6.1.15	PF00004	ATPase family associated with various cellular activities (AAA)
CPIJ016896			0.00981058	0.00976954	0.108227	0.0902686	594	84.3464	509.654	13	5	8.41186	4.58814	rna-binding protein 11-like	2	F:nucleic acid binding; F:nucleotide binding	-	PF00076	RNA recognition motif. (a.k.a. RRM, RBD, or RNP domain)
CPIJ005811			0.00980459	0.0105658	0.110576	0.0955526	252	48.0144	203.986	7	2	4.97885	2.02115	zinc finger protein	2	C:nucleus; F:zinc ion binding	-	PF07776	Zinc-finger associated domain (zf-AD)
CPIJ015966			0.00977826	0.00976706	0.0776576	0.125771	387	80.1966	306.803	9	3	6.07634	2.92366	deoxyribonuclease ii	2	P:DNA metabolic process; F:deoxyribonuclease II activity	EC:3.1.22.1	PF03265	Deoxyribonuclease II
CPIJ015151			0.00976752	0.00974297	0.0678865	0.143519	1188	266.579	921.421	26	9	17.3789	8.62109	adenylate cyclase	2	P:transmembrane transport; C:integral to membrane	-	PF07690	Major Facilitator Superfamily
CPIJ802241		X	0.00976728	0.0135472	0.0722812	0.187424	1041	221.939	819.061	26	8	15.3693	10.6307	juvenile hormone-inducible protein	1	F:transferase activity, transferring phosphorus-containing groups	-	PF02958	Ecdysteroid kinase
CPIJ801755			0.00976723	0.0110393	0.0667143	0.165472	858	243.701	614.299	22	6	15.5246	6.47541	speckle-type poz protein	0	-		PF00651	BTB/POZ domain
CPIJ017834			0.00976448	0.00922732	0.368473	0.0250421	249	44.176	204.824	15	2	13.4396	1.56045	conserved hypothetical protein	0	-		PF13371	Tetratricopeptide repeat
CPIJ016048		X	0.00976366	0.0139492	0.0706997	0.197302	666	153.897	512.103	18	5	10.8661	7.13395	aael012315- partial	0	-
CPIJ000553			0.00976116	0.0117479	0.102388	0.114739	912	194.872	717.128	27	7	18.9841	8.01587	abc transporter	4	C:integral to membrane; P:ATP catabolic process; F:ATP binding; F:ATPase activity	EC:3.6.1.3	PF01061	ABC-2 type transporter
CPIJ017611			0.00973425	0.0103762	0.153229	0.0677172	264	58.5396	205.46	10	2	8.07969	1.92031	mrg-binding protein	2	C:H4/H2A histone acetyltransferase complex; P:regulation of transcription, DNA-dependent	-	PF07904	Chromatin modification-related protein EAF7
CPIJ006225			0.00973421	0.00983613	0.000196723	50	264	58.539	205.461	2	2	0.011332	1.98867	ubiquinol cytochrome c oxidoreductase-subunit -	2	F:ubiquinol-cytochrome-c reductase activity; F:electron carrier activity	EC:1.10.2.2	PF08997	Ubiquinol-cytochrome C reductase complex, 6.4kD protein
CPIJ009522			0.00972569	0.0105432	0.184393	0.0571781	261	55.3591	205.641	11	2	9.07293	1.92707	isoform b	4	F:sequence-specific DNA binding transcription factor activity; F:sequence-specific DNA binding; C:nucleus; P:regulation of transcription, DNA-dependent	-
CPIJ000598			0.00970933	0.00963005	0.0323226	0.297936	543	131.025	411.975	8	4	4.13056	3.86944	hypothetical protein CpipJ_CPIJ000598	1	F:nucleic acid binding	-	PF05485	THAP domain
CPIJ801680			0.00969218	0.00975634	0.0798692	0.122154	804	184.944	619.056	19	6	13.4859	5.51413	zinc carboxypeptidase	3	P:proteolysis; F:metallocarboxypeptidase activity; F:zinc ion binding	EC:3.4.17.0	PF02244	Carboxypeptidase activation peptide
CPIJ006868			0.00967818	0.00985679	0.0515246	0.191302	795	175.049	619.951	15	6	8.9418	6.0582	proclotting enzyme	2	F:serine-type endopeptidase activity; P:proteolysis	EC:3.4.21.0	PF00089	Trypsin
CPIJ010296			0.00964933	0.0110921	0.0616345	0.179966	834	212.195	621.805	19	6	12.4397	6.56027	coagulation factor vii	2	F:serine-type endopeptidase activity; P:proteolysis	EC:3.4.21.0	PF12032	Regulatory CLIP domain of proteinases
CPIJ014703		X	0.0096485	0.0121524	0.0844408	0.143916	507	92.4281	414.572	12	4	7.29255	4.70745	zinc finger protein 32	3	F:nucleic acid binding; C:nucleus; F:zinc ion binding	-	PF07776	Zinc-finger associated domain (zf-AD)
CPIJ012534			0.00964404	0.00952675	0.1904	0.0500354	645	126.545	518.455	26	5	21.5768	4.42317	eukaryotic translation initiation factor 2-alpha kinase 1	5	P:translational initiation; P:protein phosphorylation; F:ATP binding; F:translation initiation factor activity; F:protein serine/threonine kinase activity	EC:2.7.11.0	PF00069	Protein kinase domain
CPIJ003876			0.0096367	0.00993919	0.0458144	0.216945	276	68.4599	207.54	5	2	3.01626	1.98374	conserved hypothetical protein	3	C:nucleus; P:cell cycle arrest; F:cyclin-dependent protein kinase inhibitor activity	-	PF02234	Cyclin-dependent kinase inhibitor
CPIJ009742			0.00963006	0.00505079	0.084621	0.0596872	285	77.3174	207.683	7	2	6.03279	0.967213	hypothetical protein CpipJ_CPIJ009742	0	-
CPIJ007904		X	0.00962598	0.0123357	0.0963604	0.128017	258	50.229	207.771	7	2	4.57654	2.42346	conserved hypothetical protein	3	C:extracellular region; F:chitin binding; P:chitin metabolic process	-	PF01607	Chitin binding Peritrophin-A domain
CPIJ019536			0.00962019	0.00974368	0.000194874	50	129	25.0516	103.948	1	1	0.00479689	0.995203	uncharacterized wd repeat-containing protein alr3466-like	3	F:ubiquitin-protein ligase activity; C:ubiquitin ligase complex; P:protein ubiquitination	EC:6.3.2.19	PF00400	WD domain, G-beta repeat
CPIJ004443			0.00961663	0.00932005	0.192038	0.0485324	249	41.0273	207.973	9	2	7.22302	1.77698	origin recognition complex subunit	3	P:DNA replication; C:origin recognition complex; C:nucleus	-
CPIJ011228			0.00961631	0.0105075	0.0466438	0.225272	1560	312.122	1247.88	27	12	14.2057	12.7943	zinc finger protein 432	3	C:nucleus; F:DNA binding; F:zinc ion binding	-	PF00096	Zinc finger, C2H2 type
CPIJ007021		X	0.00961321	0.012471	0.0999613	0.124758	249	40.9527	208.047	6	2	3.67243	2.32757	serine protease inhibitor	3	F:serine-type endopeptidase inhibitor activity; P:proteolysis; F:peptidase activity	-	PF00079	Serpin (serine protease inhibitor)
CPIJ002134			0.0096116	0.00960092	0.0321351	0.298768	720	199.795	520.205	11	5	6.18709	4.81291	trypsin epsilon	2	F:serine-type endopeptidase activity; P:proteolysis	EC:3.4.21.0	PF00089	Trypsin
CPIJ013133			0.00959527	0.0107192	0.133015	0.0805863	387	74.3464	312.654	12	3	8.96262	3.03738	conserved hypothetical protein	0	-
CPIJ004566			0.00958882	0.0110966	0.124331	0.0892503	843	217.271	625.729	31	6	24.6612	6.33882	conserved hypothetical protein	0	-		PF10253	Mitotic checkpoint protein PRCC_Cterm
CPIJ015529		X	0.00958527	0.0127488	0.0571874	0.22293	519	101.693	417.307	11	4	5.74469	5.25531	zinc finger protein 2	8	F:ER retention sequence binding; F:nucleic acid binding; P:protein retention in ER lumen; C:integral to membrane; C:nucleus; F:zinc ion binding; C:endoplasmic reticulum; P:protein transport	-	PF00096	Zinc finger, C2H2 type
CPIJ018060			0.00957634	0.0112507	0.194462	0.0578553	1221	176.756	1044.24	42	10	31.3012	10.6988	thymus-specific serine protease	2	F:serine-type peptidase activity; P:proteolysis	-	PF05577	Serine carboxypeptidase S28
CPIJ000532			0.00956804	0.0116338	0.0783079	0.148564	375	61.456	313.544	8	3	4.55072	3.44928	conserved hypothetical protein	0	-
CPIJ011021			0.00956759	0.010209	0.0547134	0.18659	879	147.363	731.637	15	7	7.78658	7.21342	conserved hypothetical protein	2	F:zinc ion binding; F:metal ion binding	-	PF01753	MYND finger
CPIJ015525			0.00956581	0.0105817	0.0379929	0.278519	297	87.9215	209.078	5	2	3.00784	1.99216	zinc finger protein 75	3	F:nucleic acid binding; C:nucleus; F:zinc ion binding	-	PF07776	Zinc-finger associated domain (zf-AD)
CPIJ002447			0.00956559	0.0106386	0.0365367	0.291176	2061	492.88	1568.12	34	15	17.6496	16.3504	helicase conserved c-terminal domain containing protein	3	F:helicase activity; F:nucleic acid binding; F:ATP binding	-	PF00271	Helicase conserved C-terminal domain
CPIJ017368			0.00955657	0.0088135	0.108305	0.0813764	153	48.3596	104.64	5	1	4.25141	0.748595	conserved hypothetical protein	3	P:protein folding; F:heat shock protein binding; F:unfolded protein binding	-
CPIJ005308			0.00955594	0.00968083	0.000204011	47.4526	255	45.7063	209.294	2	2	0.00916212	1.99084	conserved hypothetical protein	1	F:heme binding	-	PF00173	Cytochrome b5-like Heme/Steroid binding domain
CPIJ010070		X	0.00954369	0.0128457	0.0950293	0.135176	552	132.875	419.125	17	4	11.9182	5.08176	conserved hypothetical protein	0	-
CPIJ019194		X	0.00954211	0.0125319	0.0602616	0.207959	846	217.208	628.792	20	6	12.4843	7.51572	alcohol dehydrogenase	4	F:flavin adenine dinucleotide binding; F:choline dehydrogenase activity; P:oxidation-reduction process; P:alcohol metabolic process	EC:1.1.99.1	PF00732	GMC oxidoreductase
CPIJ000596			0.00953393	0.0095493	0.000190986	50	246	36.2227	209.777	2	2	0.00688313	1.99312	conserved hypothetical protein	2	C:nucleus; F:zinc ion binding	-	PF10523	BEN domain
CPIJ007295			0.00953374	0.0099764	0.0836921	0.119204	339	24.3277	314.672	5	3	1.96706	3.03294	conserved hypothetical protein	2	F:nucleic acid binding; F:nucleotide binding	-	PF00076	RNA recognition motif. (a.k.a. RRM, RBD, or RNP domain)
CPIJ013023			0.00953164	0.0113172	0.0716396	0.157974	555	135.345	419.655	14	4	9.39713	4.60287	salivary secreted angiopoietin	2	P:signal transduction; F:receptor binding	-	PF00147	Fibrinogen beta and gamma chains, C-terminal globular domain
CPIJ009208			0.00949794	0.0116539	0.0599076	0.194531	822	190.284	631.716	18	6	10.9368	7.06317	coagulation factor xi	2	F:serine-type endopeptidase activity; P:proteolysis	EC:3.4.21.0	PF00089	Trypsin
CPIJ010776		X	0.00948182	0.0219864	0.166186	0.1323	240	29.0696	210.93	8	2	4.08169	3.91831	mastermind	4	P:positive regulation of transcription from RNA polymerase II promoter; C:nuclear speck; P:Notch signaling pathway; F:transcription coactivator activity	-	PF09596	MamL-1 domain
CPIJ014878			0.00948137	0.00948184	0.00885459	1.07084	435	118.59	316.41	4	3	1.03705	2.96295	carbamoyl-phosphate synthase large chain	1	F:transferase activity	-
CPIJ012471			0.00947838	0.00964284	0.032367	0.297922	546	123.987	422.013	8	4	3.97212	4.02788	protease m1 zinc metalloprotease	3	F:metallopeptidase activity; P:proteolysis; F:zinc ion binding	-	PF01433	Peptidase family M1
CPIJ002433			0.00947768	0.00949979	0.0458253	0.207304	408	91.4674	316.533	7	3	4.07593	2.92407	conserved hypothetical protein	0	-
CPIJ001239		X	0.00947226	0.0117791	0.049622	0.237376	960	221	739	19	7	10.5923	8.40773	cathepsin b	2	F:cysteine-type peptidase activity; P:proteolysis	-	PF00112	Papain family cysteine protease
CPIJ012010			0.00946119	0.00968149	0.019111	0.506591	525	102.22	422.78	6	4	1.93844	4.06156	conserved hypothetical protein	0	-
CPIJ012697			0.00945922	0.0098379	0.0271767	0.361998	717	188.415	528.585	10	5	4.9614	5.0386	aael014436- partial	1	F:transferase activity, transferring phosphorus-containing groups	-	PF02958	Ecdysteroid kinase
CPIJ015534			0.00945399	0.0106584	0.0834579	0.12771	648	119.123	528.877	15	5	9.57242	5.42758	er lumen protein retaining receptor	7	F:ER retention sequence binding; F:nucleic acid binding; P:protein retention in ER lumen; C:integral to membrane; F:zinc ion binding; C:endoplasmic reticulum; P:protein transport	-	PF00810	ER lumen protein retaining receptor
CPIJ018799			0.00944123	0.010505	0.0880336	0.11933	687	157.408	529.592	19	5	13.5571	5.44289	serine protease	2	F:serine-type endopeptidase activity; P:proteolysis	EC:3.4.21.0	PF00089	Trypsin
CPIJ017129			0.00943828	0.0109124	0.0635116	0.171817	528	104.194	423.806	11	4	6.47491	4.52509	prolyl 4-hydroxylase alpha subunit 1	6	F:L-ascorbic acid binding; F:iron ion binding; F:procollagen-proline 4-dioxygenase activity; F:oxidoreductase activity, acting on single donors with incorporation of molecular oxygen, incorporation of two atoms of oxygen; C:endoplasmic reticulum; P:oxidation-reduction process	EC:1.14.11.2; EC:1.13.11.0	PF03171	2OG-Fe(II) oxygenase superfamily
CPIJ801990		X	0.00943527	0.0118947	0.112011	0.106193	759	123.088	635.912	20	6	12.9147	7.0853	cell division cycle protein 123 homolog	3	P:cell cycle; C:cytoplasm; P:cell division		PF07065	D123
CPIJ002942			0.00942794	0.00977132	0.130324	0.074977	414	95.7973	318.203	14	3	11.2086	2.79144	zinc metalloproteinase nas-12	4	F:metal ion binding; F:metalloendopeptidase activity; P:proteolysis; F:zinc ion binding	EC:3.4.24.0	PF01400	Astacin (Peptidase family M12A)
CPIJ007900			0.0094278	0.0103096	0.00842924	1.22307	510	85.7226	424.277	5	4	0.708868	4.29113	conserved hypothetical protein	3	C:extracellular region; F:chitin binding; P:chitin metabolic process	-	PF01607	Chitin binding Peritrophin-A domain
CPIJ019795			0.00942527	0.0101365	0.0539889	0.187751	576	151.609	424.391	12	4	7.86595	4.13405	isoform a	0	-		PF12366	Cancer susceptibility candidate 1
CPIJ012491			0.00941977	0.00957835	0.0756884	0.12655	375	56.5211	318.479	7	3	4.08623	2.91377	zinc finger protein	3	F:nucleic acid binding; C:nucleus; F:zinc ion binding	-	PF07776	Zinc-finger associated domain (zf-AD)
CPIJ011870			0.00941797	0.0098551	0.0580358	0.169811	1263	201.204	1061.8	22	10	11.6026	10.3974	conserved hypothetical protein	0	-
CPIJ010831			0.00941203	0.0109323	0.162887	0.0671155	1362	299.535	1062.47	54	10	43.6166	10.3834	fatty acyl- reductase 1	2	F:fatty-acyl-CoA reductase (alcohol-forming) activity; F:nucleotide binding	-	PF03015	Male sterility protein
CPIJ801730			0.00940766	0.00910485	0.0675651	0.134757	381	62.1115	318.889	7	3	4.13746	2.86254	odorant-binding protein 56a	1	F:odorant binding	-	PF01395	PBP/GOBP family
CPIJ801826			0.00940622	0.011647	0.134489	0.0866019	399	80.0619	318.938	13	3	9.66549	3.33451	cg31803 cg31803-pa	0	-		PF04712	Radial spokehead-like protein
CPIJ009500			0.00940079	0.0104624	0.180696	0.0579005	612	80.1304	531.87	19	5	13.7252	5.27483	zinc finger protein 136	3	F:nucleic acid binding; C:nucleus; F:zinc ion binding	-	PF13912	C2H2-type zinc finger
CPIJ801613			0.00939166	0.0110356	0.0606693	0.181898	633	100.613	532.387	11	5	5.6051	5.3949	zinc finger protein	3	F:nucleic acid binding; C:nucleus; F:zinc ion binding	-	PF07776	Zinc-finger associated domain (zf-AD)
CPIJ010787			0.00939111	0.0091952	0.147987	0.062135	387	67.549	319.451	12	3	9.27466	2.72534	salivary odorant binding protein	1	F:odorant binding	-	PF01395	PBP/GOBP family
CPIJ000182			0.00938224	0.0101394	0.085974	0.117935	825	185.494	639.506	21	6	14.9297	6.0703	n-acetyl neuraminate lyase	2	F:lyase activity; P:metabolic process	-	PF00701	Dihydrodipicolinate synthetase family
CPIJ012017			0.00937414	0.0105868	0.0830771	0.127433	558	131.294	426.706	15	4	10.607	4.39299	serine protease	2	F:serine-type endopeptidase activity; P:proteolysis	EC:3.4.21.0	PF00089	Trypsin
CPIJ001838			0.0093701	0.0115991	0.0376645	0.307958	615	188.11	426.89	12	4	7.06352	4.93648	cuticle protein	1	F:structural constituent of cuticle	-	PF00379	Insect cuticle protein
CPIJ018707			0.00936995	0.0104424	0.0496707	0.210232	1656	375.306	1280.69	31	12	18.0506	12.9494	heat repeat-containing protein 2	0	-
CPIJ010566			0.0093695	0.00768827	0.135073	0.0569195	372	51.812	320.188	8	3	5.91825	2.08175	conserved hypothetical protein	0	-		PF07165	Protein of unknown function (DUF1397)
CPIJ008305			0.00936807	0.0107839	0.0223006	0.48357	1287	326.29	960.71	17	9	7.0138	9.9862	oocyte zinc finger protein xlcof20	3	F:nucleic acid binding; C:nucleus; F:zinc ion binding	-	PF13894	C2H2-type zinc finger
CPIJ005328			0.0093679	0.00858867	0.114399	0.0750767	273	59.5048	213.495	8	2	6.30236	1.69764	latent nuclear antigen	0	-
CPIJ010343		X	0.00936204	0.0166632	0.0326797	0.509895	408	87.5573	320.443	8	3	2.79123	5.20877	lck_aedae ame: full=leucokinins contains: ame: full=leucokinin-1 contains: ame: full=leucokinin-3 contains: ame: full=leucokinin-2 flags: precursor	2	P:neuropeptide signaling pathway; C:extracellular region
CPIJ009204			0.00935163	0.00922191	0.0560278	0.164595	711	176.334	534.666	14	5	9.3391	4.6609	transmembrane protease	3	C:integral to membrane; P:proteolysis; F:serine-type endopeptidase activity	EC:3.4.21.0	PF00089	Trypsin
CPIJ014207			0.00933001	0.009991	0.257906	0.0387389	273	58.6377	214.362	15	2	13.1392	1.86075	elongator complex protein 2	0	-		PF00400	WD domain, G-beta repeat
CPIJ014818			0.00932989	0.0117037	0.157145	0.0744772	1023	165.541	857.459	34	8	24.5351	9.46494	juvenile hormone-inducible protein	1	F:transferase activity, transferring phosphorus-containing groups	-	PF02958	Ecdysteroid kinase
CPIJ000616		X	0.00932601	0.0125082	0.067309	0.185832	903	259.638	643.362	24	6	16.433	7.56702	clip-domain serine protease	2	F:serine-type endopeptidase activity; P:proteolysis	EC:3.4.21.0	PF00089	Trypsin
CPIJ008736			0.00932579	0.0107316	0.170576	0.062914	261	46.5408	214.459	9	2	6.97725	2.02275	conserved hypothetical protein	2	F:zinc ion binding; C:nucleus	-	PF07776	Zinc-finger associated domain (zf-AD)
CPIJ015477			0.00932566	0.0104977	0.129576	0.0810157	1149	183.921	965.079	33	9	23.1561	9.84388	something about silencing protein 10	0	-		PF04000	Sas10/Utp3/C1D family
CPIJ802494			0.00932105	0.0112356	0.0846823	0.132679	1356	283.155	1072.84	36	10	23.9568	12.0432	membrane glycoprotein lig-1	0	-		PF13855	Leucine rich repeat
CPIJ802493			0.00932062	0.00877985	0.0751177	0.116881	1314	241.112	1072.89	27	10	17.7621	9.23792	conserved hypothetical protein	0	-		PF13855	Leucine rich repeat
CPIJ010333			0.00931744	0.0112429	0.0498901	0.225354	411	89.0228	321.977	8	3	4.40757	3.59243	conserved hypothetical protein	0	-
CPIJ003228			0.00930839	0.00930801	0.000189184	49.2009	267	52.1397	214.86	2	2	0.00981596	1.99018	aael002830- partial	2	C:nucleus; F:zinc ion binding	-	PF07776	Zinc-finger associated domain (zf-AD)
CPIJ004392			0.00930257	0.0101733	0.103734	0.0980718	1272	304.525	967.475	39	9	29.7353	9.26474	fatty acyl- reductase 2	2	F:fatty-acyl-CoA reductase (alcohol-forming) activity; F:nucleotide binding	-	PF03015	Male sterility protein
CPIJ003772			0.00929735	0.010565	0.0747725	0.141295	522	91.7699	430.23	11	4	6.61689	4.38311	serine protease	2	F:serine-type endopeptidase activity; P:proteolysis	EC:3.4.21.0	PF00089	Trypsin
CPIJ802156			0.00929734	0.0114563	0.168705	0.0679073	789	143.654	645.346	29	6	22.2211	6.77889	n-acetyl lactosaminide beta- -n-acetyl glucosaminyl transferase	1	F:transferase activity	-	PF13896	Glycosyl-transferase for dystroglycan
CPIJ004231		X	0.00929319	0.0128498	0.0824643	0.155823	864	218.366	645.634	25	6	17.1149	7.88508	gram-negative bacteria binding protein	2	P:carbohydrate metabolic process; F:hydrolase activity, hydrolyzing O-glycosyl compounds	EC:3.2.1.0	PF00722	Glycosyl hydrolases family 16
CPIJ802242			0.00928939	0.0097639	0.114147	0.0855383	828	182.102	645.898	25	6	19.1807	5.81932	juvenile hormone-inducible	1	F:transferase activity, transferring phosphorus-containing groups	-	PF02958	Ecdysteroid kinase
CPIJ012221			0.00928821	0.0101977	0.152158	0.0670204	816	170.02	645.98	30	6	23.9112	6.08876	kinesin-ii 95 kda subunit	5	P:microtubule-based movement; C:microtubule associated complex; F:ATP binding; F:microtubule motor activity; C:microtubule	-	PF00225	Kinesin motor domain
CPIJ003209			0.00928811	0.0114955	0.0499662	0.230065	267	51.6706	215.329	5	2	2.55263	2.44737	conserved hypothetical protein	2	F:serine-type endopeptidase activity; P:proteolysis	EC:3.4.21.0	PF00089	Trypsin
CPIJ012638			0.00928809	0.0089246	0.172114	0.051853	546	115.341	430.659	21	4	17.5937	3.40629	neuronal acetylcholine receptor subunit beta-3	3	C:integral to membrane; P:ion transport; F:extracellular ligand-gated ion channel activity	-	PF02931	Neurotransmitter-gated ion-channel ligand binding domain
CPIJ013067			0.00928803	0.0105146	0.130517	0.0805613	1104	242.676	861.324	38	8	29.5505	8.44951	nitrilase and fragile histidine triad fusion protein hit	2	P:nitrogen compound metabolic process; F:hydrolase activity, acting on carbon-nitrogen (but not peptide) bonds	-	PF00795	Carbon-nitrogen hydrolase
CPIJ010641			0.0092839	0.00937616	0.071777	0.130629	855	208.72	646.28	20	6	14.2401	5.75985	serine protease	2	F:serine-type endopeptidase activity; P:proteolysis	EC:3.4.21.0	PF00089	Trypsin
CPIJ019870			0.00927992	0.00920535	0.0289111	0.318401	288	72.481	215.519	4	2	2.0547	1.9453	conserved hypothetical protein	3	F:nucleic acid binding; C:nucleus; F:zinc ion binding	-	PF13894	C2H2-type zinc finger
CPIJ019029			0.00927377	0.0094865	0.0713229	0.133008	642	102.845	539.155	12	5	7.07014	4.92986	metalloproteinase	4	F:metal ion binding; F:metalloendopeptidase activity; P:proteolysis; F:zinc ion binding	EC:3.4.24.0	PF01400	Astacin (Peptidase family M12A)
CPIJ013934			0.00927207	0.00955644	0.116847	0.081786	3564	759.881	2804.12	108	26	82.9616	25.0384	aldehyde oxidase	6	F:flavin adenine dinucleotide binding; F:oxidoreductase activity, acting on CH-OH group of donors; F:iron ion binding; F:electron carrier activity; F:2 iron, 2 sulfur cluster binding; P:oxidation-reduction process	-	PF02738	Molybdopterin-binding domain of aldehyde dehydrogenase
CPIJ006909			0.00927205	0.00990933	0.0785117	0.126215	1392	313.488	1078.51	34	10	23.7062	10.2938	conserved hypothetical protein	0	-
CPIJ008636			0.00927115	0.0094808	0.0469069	0.20212	1896	385.938	1510.06	32	14	17.8688	14.1312	conserved hypothetical protein	1	F:calcium ion binding	-
CPIJ014793			0.00926494	0.0113715	0.103353	0.110026	513	81.2649	431.735	13	4	8.20431	4.79569	ARL3	1	F:GTP binding	-	PF09439	Signal recognition particle receptor beta subunit
CPIJ017177		X	0.0092593	0.0124621	0.183718	0.0678328	729	81.0027	647.997	22	6	14.2612	7.73875	utp14a protein	2	C:small-subunit processome; P:rRNA processing	-	PF04615	Utp14 protein
CPIJ015943			0.00925746	0.00922907	0.00018607	49.6	249	32.958	216.042	2	2	0.0061325	1.99387	protein	1	F:odorant binding	-	PF01395	PBP/GOBP family
CPIJ000417			0.00925523	0.00971874	0.0807688	0.120328	1020	263.671	756.329	27	7	20.072	6.92798	conserved hypothetical protein	0	-
CPIJ008099			0.00925523	0.00900208	0.104474	0.086166	258	41.9062	216.094	6	2	4.15419	1.84581	39s ribosomal protein mitochondrial	1	C:ribosome	-
CPIJ017090		X	0.00925349	0.0150086	0.0500507	0.299868	435	110.798	324.202	10	3	5.32641	4.67359	gamma-butyrobetaine dioxygenase	2	P:oxidation-reduction process; F:oxidoreductase activity, acting on single donors with incorporation of molecular oxygen, incorporation of two atoms of oxygen	EC:1.13.11.0	PF06155	Protein of unknown function (DUF971)
CPIJ012644			0.00925138	0.00974361	0.0683064	0.142646	288	71.8157	216.184	7	2	4.89716	2.10284	conserved hypothetical protein	0	-		PF13345	Domain of unknown function (DUF4098)
CPIJ801812			0.00923425	0.00921629	0.0574831	0.16033	273	56.4148	216.585	5	2	3.09495	1.90505	AGAP009906-PA	0	-
CPIJ007165			0.00922546	0.0092972	0.0307707	0.302145	822	171.626	650.374	11	6	5.12827	5.87173	conserved hypothetical protein	0	-		PF03103	Domain of unknown function (DUF243)
CPIJ011921			0.00922539	0.00965946	0.0912358	0.105874	300	83.2072	216.793	9	2	7.05413	1.94587	methyltransferase domain-containing protein 1	2	F:methyltransferase activity; P:methylation	EC:2.1.1.0	PF01728	FtsJ-like methyltransferase
CPIJ801430			0.00922306	0.00994217	0.152536	0.0651791	1182	206.185	975.815	39	9	29.8057	9.19427	geranylgeranyl transferase type-2 alpha subunit	2	P:protein prenylation; F:protein prenyltransferase activity	-	PF01239	Protein prenyltransferase alpha subunit repeat
CPIJ018147			0.00922139	0.0104582	0.0151407	0.690733	270	53.1133	216.887	3	2	0.785219	2.21478	kazal domain-containing peptide	0	-		PF00050	Kazal-type serine protease inhibitor domain
CPIJ010703			0.00921954	0.00951518	0.119018	0.0799472	375	49.6041	325.396	9	3	5.9038	3.0962	hypothetical protein CpipJ_CPIJ010703	0	-
CPIJ005679		X	0.00920522	0.0137193	0.135112	0.10154	1386	299.662	1086.34	49	10	35.816	13.184	mediator complex subunit rgr-1	3	P:regulation of transcription from RNA polymerase II promoter; F:RNA polymerase II transcription cofactor activity; C:mediator complex	-	PF08638	Mediator complex subunit MED14
CPIJ014672			0.00920068	0.00908381	0.173755	0.0522794	837	184.874	652.126	33	6	27.862	5.13805	conserved hypothetical protein	3	C:intracellular; P:transport; F:transporter activity	-	PF00650	CRAL/TRIO domain
CPIJ006356			0.00919827	0.00940381	0.0546357	0.172118	1119	249.271	869.729	21	8	13.1206	7.87939	transmembrane and ubiquitin-like domain-containing protein 2	1	C:integral to membrane		PF00240	Ubiquitin family
CPIJ012477			0.0091917	0.00965299	0.138583	0.0696552	576	140.825	435.175	22	4	18.1033	3.89669	cdna sequence	0	-
CPIJ003592			0.00918143	0.00952208	0.261181	0.0364578	768	114.507	653.493	32	6	26.4886	5.51136	dna-repair protein complementing xp-c cells	3	F:damaged DNA binding; P:nucleotide-excision repair; C:nucleus	-	PF10405	Rad4 beta-hairpin domain 3
CPIJ002107			0.00917962	0.0103911	0.0503514	0.206372	591	155.252	435.748	12	4	7.59865	4.40135	conserved hypothetical protein	0	-		PF13279	Thioesterase-like superfamily
CPIJ008556		X	0.00917353	0.013048	0.0582565	0.223976	393	65.9723	327.028	8	3	3.79101	4.20899	ornithine decarboxylase	2	P:polyamine biosynthetic process; F:catalytic activity	-	PF00278	Pyridoxal-dependent decarboxylase, C-terminal sheet domain
CPIJ006561			0.00916212	0.010362	0.142374	0.0727801	1338	246.554	1091.45	43	10	32.522	10.478	peptidoglycan recognition protein-lc	3	F:N-acetylmuramoyl-L-alanine amidase activity; P:peptidoglycan catabolic process; F:zinc ion binding	EC:3.5.1.28	PF01510	N-acetylmuramoyl-L-alanine amidase
CPIJ015295		X	0.00915318	0.0130048	0.0733567	0.177282	399	71.2447	327.755	9	3	4.95712	4.04288	juvenile hormone-inducible protein	1	F:transferase activity, transferring phosphorus-containing groups	-	PF02958	Ecdysteroid kinase
CPIJ004040			0.00914271	0.0106291	0.0337653	0.314792	1179	303.986	875.014	19	8	9.96789	9.03211	clip-domain serine protease	2	F:serine-type endopeptidase activity; P:proteolysis	EC:3.4.21.0	PF12032	Regulatory CLIP domain of proteinases
CPIJ002236			0.0091424	0.00981504	0.0490216	0.200219	339	120.239	218.761	8	2	5.86393	2.13607	hypothetical protein CpipJ_CPIJ002236	0	-
CPIJ013908			0.00914003	0.00953427	0.101805	0.0936527	1209	333.729	875.271	39	8	31.3096	7.69037	conserved hypothetical protein	0	-
CPIJ011901			0.00913809	0.010617	0.0966788	0.109817	714	166.84	547.16	21	5	15.4395	5.56055	serine protease	2	F:serine-type endopeptidase activity; P:proteolysis	EC:3.4.21.0	PF00089	Trypsin
CPIJ003468			0.00913367	0.00959112	0.038392	0.249821	381	162.03	218.97	8	2	5.9808	2.0192	hypothetical protein CpipJ_CPIJ003468	0	-
CPIJ000455			0.00913364	0.00981195	0.0486556	0.201661	432	103.544	328.456	8	3	4.87896	3.12104	ribonuclease uk114	0	-		PF01042	Endoribonuclease L-PSP
CPIJ017309			0.00912219	0.0105009	0.0853805	0.122989	1008	240.64	767.36	27	7	19.3939	7.60611	conserved hypothetical protein	0	-		PF00646	F-box domain
CPIJ010855			0.00911241	0.00935706	0.0942343	0.0992957	255	35.5194	219.481	5	2	3.09873	1.90127	alpha- -sialyltransferase	3	F:sialyltransferase activity; P:protein glycosylation; C:integral to Golgi membrane	-	PF00777	Glycosyltransferase family 29 (sialyltransferase)
CPIJ801748			0.00910863	0.00952513	0.0341065	0.279276	621	181.856	439.144	10	4	5.97232	4.02768	protein sister of odd and bowel	3	F:zinc ion binding; F:nucleic acid binding; C:intracellular	-	PF00096	Zinc finger, C2H2 type
CPIJ010224			0.00910498	0.0111646	0.157421	0.0709221	285	65.3402	219.66	12	2	9.68973	2.31027	zinc metalloproteinase nas-8	4	F:metal ion binding; F:metalloendopeptidase activity; P:proteolysis; F:zinc ion binding	EC:3.4.24.0	PF01400	Astacin (Peptidase family M12A)
CPIJ014046			0.0091048	0.010117	0.139025	0.0727707	696	146.839	549.161	24	5	18.8656	5.13435	conserved hypothetical protein	2	P:oxidation-reduction process; F:oxidoreductase activity, acting on paired donors, with incorporation or reduction of molecular oxygen, 2-oxoglutarate as one donor, and incorporation of one atom each of oxygen into both donors	EC:1.14.11.0
CPIJ014475			0.00908174	0.009456	0.00018912	50	153	42.8888	110.111	1	1	0.00772988	0.99227	zinc finger protein znf780a	3	F:zinc ion binding; F:nucleic acid binding; C:intracellular	-
CPIJ011223			0.0090726	0.010039	0.0462636	0.216996	855	193.668	661.332	15	6	8.61576	6.38424	zinc finger protein gfi-1	3	F:nucleic acid binding; C:nucleus; F:zinc ion binding	-	PF07776	Zinc-finger associated domain (zf-AD)
CPIJ011382			0.00907156	0.00944149	0.0902637	0.104599	696	144.827	551.173	18	5	12.8748	5.12517	chymotrypsin 1	2	F:serine-type endopeptidase activity; P:proteolysis	EC:3.4.21.0	PF00089	Trypsin
CPIJ015025			0.00906881	0.010105	0.194049	0.0520744	279	58.4641	220.536	12	2	10.0298	1.97019	conserved hypothetical protein	0	-
CPIJ010052			0.009063	0.0116689	0.0411881	0.283307	591	149.645	441.355	11	4	5.9927	5.0073	ankyrin repeat domain-containing protein 44	0	-		PF12796	Ankyrin repeats (3 copies)
CPIJ011162			0.00906045	0.00932993	0.0650721	0.143378	591	149.521	441.479	13	4	9.13342	3.86658	zinc finger protein	3	F:nucleic acid binding; C:nucleus; F:zinc ion binding	-	PF13465	Zinc-finger double domain
CPIJ017203			0.00902737	0.00980736	0.105164	0.0932581	1209	212.032	996.968	31	9	21.5503	9.44971	conserved hypothetical protein	3	F:nucleic acid binding; F:ATP binding; F:helicase activity	-	PF00271	Helicase conserved C-terminal domain
CPIJ002657			0.00902245	0.0100669	0.139633	0.0720956	396	63.4963	332.504	12	3	8.71121	3.28879	proclotting enzyme	3	C:integral to membrane; P:proteolysis; F:serine-type endopeptidase activity	EC:3.4.21.0	PF00089	Trypsin
CPIJ019307			0.00902035	0.0099453	0.0356215	0.279193	3078	749.926	2328.07	49	21	26.2491	22.7509	conserved hypothetical protein	0	-
CPIJ801850			0.00901556	0.0114842	0.078176	0.146902	399	66.242	332.758	9	3	5.17853	3.82147	morn repeat-containing protein 3-like	0	-		PF02493	MORN repeat
CPIJ014101			0.00901517	0.00991317	0.038936	0.254602	1728	396.912	1331.09	28	12	15.1038	12.8962	aael007478- partial	4	C:integral to membrane; P:homophilic cell adhesion; F:calcium ion binding; C:plasma membrane	-
CPIJ018561			0.00901372	0.00915279	0.0202122	0.452834	273	51.1164	221.884	3	2	1.01159	1.98841	hypothetical conserved protein	0	-
CPIJ002394			0.00900741	0.0109069	0.104637	0.104236	1209	209.823	999.177	31	9	20.7168	10.2832	dopachrome-conversion enzyme	0	-		PF03022	Major royal jelly protein
CPIJ004403			0.00900212	0.010182	0.105328	0.096669	822	155.49	666.51	22	6	15.5546	6.44539	hepatic triacylglycerol lipase	3	C:extracellular region; P:lipid metabolic process; F:catalytic activity	-	PF00151	Lipase
CPIJ000242			0.00900125	0.0112471	0.0725504	0.155025	1071	293.33	777.67	28	7	19.8441	8.1559	monocarboxylate transporter	2	P:transmembrane transport; C:integral to membrane	-	PF07690	Major Facilitator Superfamily
CPIJ013669			0.00900027	0.00903398	0.175163	0.0515748	564	119.569	444.431	22	4	18.461	3.539	aminoacylase	5	C:cytoplasm; P:cellular amino acid metabolic process; F:metallopeptidase activity; P:proteolysis; F:aminoacylase activity	EC:3.5.1.14	PF01546	Peptidase family M20/M25/M40
CPIJ011312			0.00899802	0.00959777	0.0768612	0.124871	609	164.458	444.542	15	4	11.2146	3.78535	pftaire-interacting factor	0	-
CPIJ016316			0.00899588	0.00999478	0.14039	0.0711929	300	77.6759	222.324	12	2	9.96869	2.03131	pupal cuticle protein 78e	1	F:structural constituent of cuticle	-	PF00379	Insect cuticle protein
CPIJ011467			0.00898045	0.00933874	0.106152	0.0879751	561	115.588	445.412	15	4	11.2023	3.79767	conserved hypothetical protein	0	-
CPIJ019590			0.00896604	0.0091845	0.0544182	0.168776	447	112.404	334.596	9	3	5.99042	3.00958	predicted protein	2	F:zinc ion binding; F:nucleic acid binding	-	PF00098	Zinc knuckle
CPIJ012946			0.00896227	0.00941775	0.0820538	0.114775	1296	291.794	1004.21	32	9	22.9391	9.0609	conserved hypothetical protein	3	F:Rho guanyl-nucleotide exchange factor activity; C:intracellular; P:regulation of Rho protein signal transduction	-	PF00621	RhoGEF domain
CPIJ001244			0.0089594	0.00943327	0.122073	0.077276	450	115.156	334.844	16	3	13.0644	2.93556	potentail helicase mov-10	4	F:helicase activity; C:intracellular; F:ATP binding; F:zinc ion binding	-	PF13086	AAA domain
CPIJ001521			0.00895404	0.0099781	0.0481935	0.207043	3252	906.694	2345.31	65	21	42.3302	22.6698	multidrug resistance-associated protein 1	5	P:transmembrane transport; C:integral to membrane; F:ATPase activity, coupled to transmembrane movement of substances; P:ATP catabolic process; F:ATP binding	-	PF00005	ABC transporter
CPIJ014115			0.00895359	0.00972327	0.167157	0.0581685	432	96.9387	335.061	18	3	14.9868	3.01318	conserved hypothetical protein	0	-		PF00646	F-box domain
CPIJ802386			0.00895253	0.00934642	0.1943	0.0481029	558	111.199	446.801	23	4	19.2746	3.7254	zinc finger and btb domain-containing protein 24	3	C:intracellular; F:DNA binding; F:zinc ion binding	-	PF13894	C2H2-type zinc finger
CPIJ005660			0.00895077	0.00951802	0.0399767	0.238089	705	146.389	558.611	11	5	5.76359	5.23641	phospholipid scramblase 1	0	-		PF03803	Scramblase
CPIJ010710			0.00894544	0.00936307	0.111976	0.0836168	555	107.845	447.155	15	4	11.1384	3.86164	molybdopterin cofactor sulfurase	4	P:metabolic process; F:molybdenum ion binding; F:pyridoxal phosphate binding; F:catalytic activity	-	PF03476	MOSC N-terminal beta barrel domain
CPIJ006636			0.0089372	0.0100498	0.0992401	0.101267	813	141.649	671.351	20	6	13.5139	6.48613	conserved hypothetical protein	2	F:zinc ion binding; F:metal ion binding	-	PF00856	SET domain
CPIJ002560			0.00893523	0.0103358	0.0979299	0.105543	273	49.1669	223.833	7	2	4.72818	2.27182	rna-binding protein	2	F:nucleic acid binding; F:nucleotide binding	-	PF00076	RNA recognition motif. (a.k.a. RRM, RBD, or RNP domain)
CPIJ014157			0.00892748	0.00984252	0.106255	0.0926307	1515	282.845	1232.15	40	11	28.4996	11.5004	juvenile hormone resistant protein	8	F:signal transducer activity; P:regulation of transcription, DNA-dependent; C:transcription factor complex; F:DNA binding; F:protein dimerization activity; F:sequence-specific DNA binding transcription factor activity; P:signal transduction; C:cytoplasm	-	PF00010	Helix-loop-helix DNA-binding domain
CPIJ010449			0.00891495	0.00996526	0.0776887	0.128272	3837	920.546	2916.45	95	26	67.5489	27.4511	conserved hypothetical protein	0	-
CPIJ005202			0.00890607	0.0105545	0.168499	0.0626384	558	108.868	449.132	21	4	16.6877	4.31231	gonadal protein gdl	0	-		PF07324	DiGeorge syndrome critical region 6 (DGCR6) protein
CPIJ016427			0.00888471	0.00976692	0.0403616	0.241985	4566	1076.86	3489.14	76	31	42.5995	33.4005	ion channel nompc	0	-
CPIJ004851			0.00887946	0.00955581	0.0474996	0.201177	309	83.7613	225.239	6	2	3.89364	2.10636	cyclic amp-dependent transcription factor atf-2-like isoform 2	5	F:sequence-specific DNA binding transcription factor activity; F:sequence-specific DNA binding; C:intracellular; F:zinc ion binding; P:regulation of transcription, DNA-dependent	-	PF07716	Basic region leucine zipper
CPIJ006601			0.00887717	0.00885383	0.000177077	50	255	29.7031	225.297	2	2	0.00525972	1.99474	mannosyl-oligosaccharide alpha- -	3	F:mannosyl-oligosaccharide 1,2-alpha-mannosidase activity; F:calcium ion binding; C:membrane	EC:3.2.1.113	PF01532	Glycosyl hydrolase family 47
CPIJ802088			0.00886824	0.00993221	0.0468429	0.212033	687	123.19	563.81	11	5	5.58257	5.41743	conserved hypothetical protein	0	-
CPIJ002797			0.00885865	0.00847511	0.0537074	0.157802	630	178.464	451.536	13	4	9.29064	3.70936	cuticle protein	0	-		PF11018	Pupal cuticle protein C1
CPIJ016133			0.00885568	0.0092817	0.118594	0.0782647	1671	428.861	1242.14	58	11	47.282	10.718	dihydroxyacetone kinase	3	P:glycerol metabolic process; P:phosphorylation; F:glycerone kinase activity	EC:2.7.1.29	PF02734	DAK2 domain
CPIJ800198			0.00885048	0.00879951	0.0534609	0.164597	597	145.047	451.953	11	4	7.27096	3.72904	cytochrome p450 6j1	6	F:heme binding; F:oxidoreductase activity, acting on paired donors, with incorporation or reduction of molecular oxygen; F:monooxygenase activity; F:iron ion binding; F:electron carrier activity; P:oxidation-reduction process	-	PF00067	Cytochrome P450
CPIJ018422			0.00884596	0.00900602	0.00018012	50	312	85.9075	226.092	2	2	0.015084	1.98492	conserved hypothetical protein	0	-
CPIJ003990			0.00884048	0.00938036	0.0969162	0.0967883	549	96.5358	452.464	13	4	8.94302	4.05698	btb poz domain-containing protein 3	0	-		PF07707	BTB And C-terminal Kelch
CPIJ013029			0.00883775	0.00918759	0.077236	0.118955	903	224.094	678.906	22	6	16.1719	5.82805	gut esterase 1	1	F:hydrolase activity	-	PF00135	Carboxylesterase family
CPIJ008178			0.0088328	0.00910189	0.0374403	0.243104	447	107.357	339.643	7	3	3.95681	3.04319	ribonuclease p protein subunit p40-like	0	-		PF08584	Ribonuclease P 40kDa (Rpp40) subunit
CPIJ007381			0.0088309	0.00968785	0.121335	0.0798441	558	105.045	452.955	16	4	11.9022	4.09779	hydroxypyruvate isomerase	1	F:hydroxypyruvate isomerase activity	EC:5.3.1.22	PF01261	Xylose isomerase-like TIM barrel
CPIJ011922			0.00882431	0.00922464	0.117388	0.0785828	2589	549.183	2039.82	78	18	60.3772	17.6228	nfx1-type zinc finger-containing protein 1	2	F:nucleoside-triphosphatase activity; F:ATP binding	EC:3.6.1.15	PF13086	AAA domain
CPIJ008661			0.00881931	0.00909789	0.0224425	0.405386	276	49.2248	226.775	3	2	1.04618	1.95382	conserved hypothetical protein	0	-
CPIJ018373			0.00881531	0.00938544	0.113829	0.0824525	285	58.1221	226.878	8	2	6.05212	1.94788	pra1 protein	0	-		PF03208	PRA1 family protein
CPIJ009654			0.00881273	0.00890981	0.0762765	0.116809	2772	729.5	2042.5	70	18	52.7486	17.2514	paraflagellar rod protein	1	C:flagellum	-
CPIJ012345			0.00881044	0.0101826	0.0504849	0.201695	909	227.99	681.01	18	6	11.2327	6.76733	hemolymph proteinase 8	2	F:serine-type endopeptidase activity; P:proteolysis	EC:3.4.21.0	PF00089	Trypsin
CPIJ001619			0.00880621	0.00893824	0.0399466	0.223755	561	106.775	454.225	8	4	4.09866	3.90134	histone deacetylase 11	1	F:hydrolase activity	-	PF00850	Histone deacetylase domain
CPIJ009098			0.00879892	0.00847077	0.031572	0.2683	474	133.049	340.951	7	3	4.14804	2.85196	conserved hypothetical protein	0	-		PF04527	Drosophila Retinin like protein
CPIJ012663			0.0087979	0.0094037	0.138204	0.0680422	267	39.6728	227.327	7	2	5.03639	1.96361	predicted protein	0	-		PF12937	F-box-like
CPIJ005902			0.00879712	0.00910812	0.0552849	0.164749	1053	257.285	795.715	21	7	13.9117	7.08834	conserved hypothetical protein	0	-		PF05444	Protein of unknown function (DUF753)
CPIJ011235			0.0087959	0.00883615	0.0127125	0.695074	423	81.9318	341.068	4	3	1.02736	2.97264	phosphatidylinositol 3-kinase regulatory subunit	3	C:intracellular; P:phosphorylation; P:signal transduction	-
CPIJ011743			0.00878887	0.00888292	0.0556922	0.1595	588	132.879	455.121	11	4	7.11374	3.88626	conserved hypothetical protein	3	P:cell redox homeostasis; C:nucleus; F:zinc ion binding	-	PF07776	Zinc-finger associated domain (zf-AD)
CPIJ009782			0.00878771	0.00866984	0.10392	0.0834278	1113	202.638	910.362	27	8	19.6392	7.36082	zinc finger protein 596	3	F:zinc ion binding; F:nucleic acid binding; C:intracellular	-	PF00096	Zinc finger, C2H2 type
CPIJ019467			0.00878444	0.00923345	0.0220797	0.418187	813	129.974	683.026	9	6	2.8146	6.1854	zinc finger protein 572	3	F:zinc ion binding; F:nucleic acid binding; C:intracellular	-	PF13894	C2H2-type zinc finger
CPIJ013060			0.00877462	0.00984753	0.0704533	0.139774	408	66.105	341.895	8	3	4.64331	3.35669	conserved hypothetical protein	0	-
CPIJ008952			0.00876422	0.00987335	0.099441	0.0992886	435	92.6988	342.301	12	3	8.78069	3.21931	conserved hypothetical protein	0	-
CPIJ018690			0.00876083	0.00872245	0.162961	0.0535247	573	116.422	456.578	21	4	17.3567	3.64333	conserved hypothetical protein	0	-		PF00017	SH2 domain
CPIJ014593			0.00876077	0.0094019	0.102469	0.0917534	819	134.129	684.871	20	6	13.6193	6.38065	conserved hypothetical protein	2	F:zinc ion binding; C:nucleus	-	PF04500	FLYWCH zinc finger domain
CPIJ004491			0.00875979	0.00893371	0.118395	0.075457	852	167.052	684.948	23	6	17.5654	5.43456	sodium potassium calcium exchanger 3	2	P:transmembrane transport; C:integral to membrane	-	PF01699	Sodium/calcium exchanger protein
CPIJ010024			0.00874881	0.00891481	0.0500303	0.178188	606	148.795	457.205	11	4	7.10813	3.89187	conserved hypothetical protein	0	-		PF00646	F-box domain
CPIJ006120		X	0.00874051	0.0128579	0.054217	0.237156	558	100.361	457.639	11	4	5.28487	5.71513	fibrinogen and fibronectin	3	C:extracellular space; P:signal transduction; F:receptor binding	-	PF00147	Fibrinogen beta and gamma chains, C-terminal globular domain
CPIJ017784			0.00873645	0.0115008	0.14145	0.0813063	567	109.148	457.852	19	4	14.1679	4.83215	serpin b8	3	F:serine-type endopeptidase inhibitor activity; P:proteolysis; F:peptidase activity	-	PF00079	Serpin (serine protease inhibitor)
CPIJ001720			0.00873276	0.00936246	0.0426275	0.219634	462	118.466	343.534	8	3	4.88727	3.11273	conserved hypothetical protein	2	F:zinc ion binding; F:nucleic acid binding	-	PF00567	Tudor domain
CPIJ012723			0.00871943	0.00997398	0.121541	0.0820627	423	78.9409	344.059	13	3	9.57526	3.42474	conserved hypothetical protein	0	-
CPIJ002919			0.00871626	0.00872779	0.096709	0.0902479	858	169.631	688.369	21	6	15.3708	5.62922	zinc finger protein 394	3	F:zinc ion binding; F:nucleic acid binding; C:intracellular	-	PF13894	C2H2-type zinc finger
CPIJ017918			0.00871118	0.00910073	0.0979125	0.0929476	717	143.025	573.975	18	5	13.1099	4.89009	pseudouridylate synthase	4	F:pseudouridine synthase activity; F:RNA binding; P:pseudouridine synthesis; P:tRNA processing	EC:5.4.99.12	PF01416	tRNA pseudouridine synthase
CPIJ005936			0.00870022	0.00898088	0.0383916	0.233928	450	105.181	344.819	7	3	3.96174	3.03826	carbonic anhydrase	4	F:metal ion binding; F:zinc ion binding; P:one-carbon metabolic process; F:carbonate dehydratase activity		PF00194	Eukaryotic-type carbonic anhydrase
CPIJ005768			0.00869909	0.0102546	0.0727834	0.140892	888	198.273	689.727	20	6	13.4218	6.57824	conserved hypothetical protein	3	F:hydrogen ion transmembrane transporter activity; C:proton-transporting two-sector ATPase complex, proton-transporting domain; P:ATP hydrolysis coupled proton transport		PF12516	Protein of unknown function (DUF3719)
CPIJ015928			0.00868931	0.00875748	0.170913	0.0512393	288	57.8317	230.168	11	2	9.13674	1.86326	comm domain-containing protein 2	0	-		PF07258	HCaRG protein
CPIJ009332			0.00868576	0.00888269	0.1584	0.0560777	165	49.8692	115.131	7	1	6.19763	0.80237	pupal cuticle protein 78e	1	F:structural constituent of cuticle	-	PF00379	Insect cuticle protein
CPIJ801775			0.0086723	0.00946337	0.021609	0.437936	801	224.452	576.548	10	5	4.70605	5.29395	crumbs	1	F:calcium ion binding	-	PF02210	Laminin G domain
CPIJ014825			0.00865923	0.00870954	0.140337	0.0620615	564	102.065	461.935	17	4	13.2721	3.72792	5 -3 exoribonuclease	2	F:zinc ion binding; C:intracellular	-
CPIJ020293			0.00865748	0.0104629	0.026203	0.399303	894	200.958	693.042	12	6	5.04823	6.95177	hypothetical protein CpipJ_CPIJ020293	2	F:zinc ion binding; C:nucleus	-
CPIJ000004			0.00864799	0.00922872	0.0554032	0.166574	2496	645.858	1850.14	51	16	34.5254	16.4746	conserved hypothetical protein	3	F:catalytic activity; P:glyoxylate cycle; F:malate synthase activity		PF12530	Protein of unknown function (DUF3730)
CPIJ007217			0.0086477	0.00983139	0.112463	0.0874186	1869	365.712	1503.29	53	13	38.9895	14.0105	speckle-type poz protein	0	-		PF00651	BTB/POZ domain
CPIJ004597			0.00864657	0.00964068	0.04832	0.199517	1092	282.43	809.57	21	7	13.3596	7.64042	aael010029- partial	3	F:RNA methyltransferase activity; P:RNA methylation; F:O-methyltransferase activity	-
CPIJ005494			0.00864528	0.00876703	0.0261847	0.334815	1389	347.971	1041.03	18	9	8.99249	9.00751	conserved hypothetical protein	0	-
CPIJ004539			0.00864479	0.00888005	0.174659	0.0508422	432	84.9702	347.03	16	3	13.2489	2.75109	adrenodoxin	3	F:2 iron, 2 sulfur cluster binding; F:metal ion binding; F:electron carrier activity	-	PF00111	2Fe-2S iron-sulfur cluster binding domain
CPIJ016355			0.00864375	0.00895007	0.0258136	0.346719	270	38.6193	231.381	3	2	0.974878	2.02512	cytochrome p450	5	F:heme binding; F:oxidoreductase activity, acting on paired donors, with incorporation or reduction of molecular oxygen; F:iron ion binding; F:electron carrier activity; P:oxidation-reduction process	-	PF00067	Cytochrome P450
CPIJ016689			0.00863961	0.00959006	0.172218	0.0556856	444	96.7616	347.238	18	3	15.0021	2.99791	antifreeze protein	1	F:carbohydrate binding	-	PF00059	Lectin C-type domain
CPIJ016518			0.00863569	0.00942356	0.128155	0.0735324	294	62.4034	231.597	10	2	7.85608	2.14392	conserved hypothetical protein	0	-		PF12937	F-box-like
CPIJ015632			0.008628	0.00865985	0.030046	0.28822	417	69.2946	347.705	5	3	2.04396	2.95604	predicted protein	1	F:nucleic acid binding	-	PF05485	THAP domain
CPIJ013208			0.00862702	0.0102215	0.0608385	0.168011	1074	262.596	811.404	23	7	15.1401	7.85988	conserved hypothetical protein	0	-
CPIJ002785			0.00860341	0.00877934	0.101467	0.0865241	1494	331.671	1162.33	42	10	32.2279	9.77215	aael000918- partial	1	F:hydrolase activity	-	PF00135	Carboxylesterase family
CPIJ006804			0.0086024	0.00880174	0.0782	0.112554	468	119.26	348.74	12	3	9.02845	2.97155	salivary c-type lectin	1	F:carbohydrate binding	-	PF00059	Lectin C-type domain
CPIJ008770			0.00860171	0.00839656	0.22736	0.0369306	555	89.976	465.024	21	4	17.6342	3.36582	nadh:ubiquinone dehydrogenase	3	C:mitochondrial inner membrane; F:oxidoreductase activity, acting on NADH or NADPH; P:electron transport chain	-	PF04800	ETC complex I subunit conserved region
CPIJ801631			0.00859705	0.00928352	0.107984	0.0859713	582	116.724	465.276	16	4	11.9164	4.08364	amp dependent ligase	2	F:ligase activity; P:metabolic process	-	PF00501	AMP-binding enzyme
CPIJ019903		X	0.00859217	0.0128569	0.0506584	0.253796	528	178.845	349.155	13	3	8.69286	4.30714	conserved hypothetical protein	0	-
CPIJ001247			0.00859098	0.00860295	0.0290227	0.296421	1377	329.394	1047.61	18	9	9.26527	8.73473	potentail helicase mov-10	2	F:ATP binding; F:helicase activity	-	PF13087	AAA domain
CPIJ009381			0.00858895	0.00899026	0.0483768	0.185838	843	144.428	698.572	13	6	6.8462	6.1538	transcriptional protein swt1	0	-		PF00397	WW domain
CPIJ002490			0.00858316	0.0109282	0.0653425	0.167245	912	212.957	699.043	21	6	13.5572	7.44277	conserved hypothetical protein	2	F:serine-type endopeptidase activity; P:proteolysis	EC:3.4.21.0	PF00089	Trypsin
CPIJ003982			0.00856948	0.00732085	0.0213464	0.342955	645	178.227	466.773	7	4	3.68772	3.31228	hypothetical protein CpipJ_CPIJ003982	0	-
CPIJ003498			0.00855593	0.00841925	0.0504804	0.166783	2295	541.832	1753.17	41	15	26.6295	14.3705	conserved hypothetical protein	3	C:ubiquitin ligase complex; P:protein ubiquitination; F:ubiquitin-protein ligase activity		PF12796	Ankyrin repeats (3 copies)
CPIJ017083			0.00854631	0.00996397	0.0676877	0.147205	612	143.962	468.038	14	4	9.46854	4.53146	conserved hypothetical protein	1	P:cell-matrix adhesion	-
CPIJ016469			0.0085383	0.00867313	0.0928162	0.0934441	2112	472.334	1639.67	55	14	41.5288	13.4712	signal transducer and activator of transcription	6	F:calcium ion binding; F:signal transducer activity; P:regulation of transcription, DNA-dependent; F:sequence-specific DNA binding transcription factor activity; P:signal transduction; C:nucleus	-	PF01017	STAT protein, all-alpha domain
CPIJ801544			0.00853677	0.00961022	0.0663083	0.144932	930	227.158	702.842	21	6	14.4985	6.50153	phospholipase a1 1	3	C:extracellular region; F:hydrolase activity; P:lipid metabolic process	-	PF00151	Lipase
CPIJ015891			0.00853668	0.00937393	0.0223055	0.420252	594	125.434	468.566	7	4	2.72387	4.27613	ischemia reperfusion inducible protein	0	-		PF01300	Telomere recombination
CPIJ006835			0.00853432	0.00969775	0.0419702	0.231063	138	20.8256	117.174	2	1	0.86954	1.13046	conserved hypothetical protein	0	-
CPIJ004709		X	0.00851118	0.0129537	0.0391239	0.331093	288	53.015	234.985	5	2	2.0263	2.9737	bifunctional protein fold	4	P:folic acid-containing compound biosynthetic process; F:methylenetetrahydrofolate dehydrogenase (NADP+) activity; P:oxidation-reduction process; F:nucleotide binding	EC:1.5.1.5	PF00763	Tetrahydrofolate dehydrogenase/cyclohydrolase, catalytic domain
CPIJ010701			0.00850261	0.00923728	0.190902	0.0483875	174	56.3886	117.611	10	1	9.08329	0.916714	cec-a	3	C:extracellular region; P:innate immune response; P:defense response to bacterium	-	PF00272	Cecropin family
CPIJ011279			0.00850099	0.00968548	0.0497835	0.194552	1374	315.305	1058.7	25	9	15.1218	9.87822	conserved hypothetical protein	2	F:zinc ion binding; C:intracellular
CPIJ000178			0.00849949	0.00919318	0.0631268	0.14563	912	206.075	705.925	19	6	12.6762	6.32376	zinc finger protein 60	2	C:intracellular; F:zinc ion binding	-	PF00096	Zinc finger, C2H2 type
CPIJ013235			0.00849842	0.00904801	0.0693248	0.130516	426	72.9931	353.007	8	3	4.90437	3.09563	glycoprotein hormone beta subunit	2	C:extracellular region; F:hormone activity	-	PF00007	Cystine-knot domain
CPIJ020143			0.00849305	0.00895445	0.0761927	0.117524	903	196.54	706.46	21	6	14.7634	6.23661	macroglobulin complement	3	C:extracellular space; F:endopeptidase inhibitor activity; P:negative regulation of endopeptidase activity	-	PF07703	Alpha-2-macroglobulin family N-terminal region
CPIJ005161			0.00847166	0.00828724	0.110103	0.0752681	831	122.756	708.244	19	6	13.2472	5.75276	dna ligase 4	6	P:DNA replication; F:DNA binding; F:ATP binding; F:DNA ligase (ATP) activity; P:DNA recombination; P:DNA repair	EC:6.5.1.1	PF04675	DNA ligase N terminus
CPIJ005077			0.00846686	0.00961064	0.0655857	0.146536	285	48.7849	236.215	5	2	2.9248	2.0752	hypothetical protein CpipJ_CPIJ005077	0	-
CPIJ006712			0.00846578	0.0099321	0.124766	0.0796057	411	56.6322	354.368	10	3	6.67503	3.32497	pterin-4a-carbinolamine dehydratase cg1963-pa	2	F:4-alpha-hydroxytetrahydrobiopterin dehydratase activity; P:tetrahydrobiopterin biosynthetic process	EC:4.2.1.96	PF01329	Pterin 4 alpha carbinolamine dehydratase
CPIJ002887			0.00846382	0.00854839	0.0100984	0.846506	339	102.7	236.3	3	2	1.01774	1.98226	conserved hypothetical protein	3	F:zinc ion binding; F:nucleic acid binding; C:intracellular	-	PF12171	Zinc-finger double-stranded RNA-binding
CPIJ007299			0.00844313	0.00831919	0.061899	0.1344	291	54.1209	236.879	5	2	3.14813	1.85187	beat protein	1	C:membrane	-	PF08205	CD80-like C2-set immunoglobulin domain
CPIJ014772			0.00843913	0.00972692	0.0531372	0.183053	441	85.5131	355.487	8	3	4.54295	3.45705	fibrinogen and fibronectin	3	C:extracellular space; P:signal transduction; F:receptor binding	-	PF00147	Fibrinogen beta and gamma chains, C-terminal globular domain
CPIJ005230			0.00843775	0.00861676	0.0256886	0.335431	594	119.94	474.06	7	4	3.00974	3.99026	pmp22 peroxisomal membrane protein	1	C:integral to membrane	-	PF04117	Mpv17 / PMP22 family
CPIJ013593			0.00843341	0.00899073	0.25711	0.0349685	297	59.8477	237.152	15	2	13.1745	1.82553	conserved hypothetical protein	4	F:Rho guanyl-nucleotide exchange factor activity; F:phospholipid binding; C:intracellular; P:regulation of Rho protein signal transduction	-
CPIJ014174			0.00841893	0.00956356	0.0938658	0.101886	456	99.6601	356.34	12	3	8.79574	3.20426	conserved hypothetical protein	0	-
CPIJ801478			0.00841724	0.00923466	0.0772019	0.119617	2499	598.143	1900.86	61	16	44.1986	16.8014	protease m1 zinc metalloprotease	3	F:metalloendopeptidase activity; P:proteolysis; F:zinc ion binding	EC:3.4.24.0	PF01433	Peptidase family M1
CPIJ001968			0.00840841	0.00847045	0.0661166	0.128114	585	109.286	475.714	11	4	7.06183	3.93817	conserved hypothetical protein	1	C:cytoplasm	-	PF02545	Maf-like protein
CPIJ014383			0.00840327	0.00879619	0.0409954	0.214565	453	95.9958	357.004	7	3	3.8933	3.1067	factor for adipocyte differentiation	0	-
CPIJ010803			0.00840278	0.0110815	0.093899	0.118015	1047	213.942	833.058	28	7	19.1842	8.81578	carboxypeptidase b	3	P:proteolysis; F:metallocarboxypeptidase activity; F:zinc ion binding	EC:3.4.17.0	PF02244	Carboxypeptidase activation peptide
CPIJ011304			0.00839846	0.0096122	0.11081	0.0867448	2697	672.818	2024.18	87	17	68.9943	18.0057	conserved hypothetical protein	3	C:extracellular region; F:chitin binding; P:chitin metabolic process	-	PF01607	Chitin binding Peritrophin-A domain
CPIJ004734			0.00839747	0.00835383	0.0912971	0.0915016	609	132.666	476.334	15	4	11.2906	3.70936	conserved hypothetical protein	3	C:extracellular region; F:chitin binding; P:chitin metabolic process	-	PF01607	Chitin binding Peritrophin-A domain
CPIJ000345			0.00839634	0.00945045	0.0229821	0.411209	3483	862.808	2620.19	44	22	19.5663	24.4337	macroglobulin complement	3	C:extracellular space; F:endopeptidase inhibitor activity; P:negative regulation of endopeptidase activity	-	PF07703	Alpha-2-macroglobulin family N-terminal region
CPIJ005727			0.00839123	0.00904842	0.0842341	0.10742	780	184.14	595.86	20	5	14.8412	5.15881	phospholysine phosphohistidine inorganic pyrophosphate phosphatase	2	F:hydrolase activity; P:metabolic process	-	PF13242	HAD-hyrolase-like
CPIJ016679			0.00838917	0.00883123	0.0278056	0.317606	462	104.396	357.604	6	3	2.87363	3.12637	g-protein coupled receptor	3	C:integral to membrane; P:G-protein coupled receptor signaling pathway; F:G-protein coupled receptor activity	-	PF00001	7 transmembrane receptor (rhodopsin family)
CPIJ002805			0.00838191	0.00821255	0.0346529	0.236994	789	192.477	596.523	11	5	6.34191	4.65809	hypothetical protein CpipJ_CPIJ002805	0	-
CPIJ012948			0.00838032	0.00863924	0.118336	0.0730062	1137	182.382	954.618	28	8	20.2586	7.74135	conserved hypothetical protein	3	F:Rho guanyl-nucleotide exchange factor activity; C:intracellular; P:regulation of Rho protein signal transduction	-	PF00621	RhoGEF domain
CPIJ008388			0.00837138	0.00997015	0.054359	0.183413	1104	267.818	836.182	22	7	13.9891	8.0109	aminopeptidase n	4	F:metalloendopeptidase activity; P:proteolysis; F:zinc ion binding; F:aminopeptidase activity	EC:3.4.24.0; EC:3.4.11.0	PF11838	Domain of unknown function (DUF3358)
CPIJ802297			0.00837069	0.00964896	0.140198	0.068824	306	67.0713	238.929	11	2	8.83412	2.16588	conserved hypothetical protein	1	P:allantoin biosynthetic process	-	PF09349	OHCU decarboxylase
CPIJ009020		X	0.0083478	0.017585	0.040852	0.430457	285	45.4164	239.584	6	2	1.83443	4.16557	conserved hypothetical protein	0	-		PF13855	Leucine rich repeat
CPIJ000348			0.00834628	0.00939513	0.0560044	0.167757	3657	901.28	2755.72	74	23	48.9118	25.0882	macroglobulin complement	3	C:extracellular space; F:endopeptidase inhibitor activity; P:negative regulation of endopeptidase activity	-	PF07678	A-macroglobulin complement component
CPIJ801486			0.00834477	0.0108917	0.0730455	0.149109	816	216.822	599.178	21	5	14.8719	6.12807	protease m1 zinc metalloprotease	1	F:metallopeptidase activity	-	PF01433	Peptidase family M1
CPIJ003764			0.00834413	0.00824062	0.0346381	0.237906	456	96.4658	359.534	6	3	3.18017	2.81983	conserved hypothetical protein	0	-
CPIJ001514			0.00833574	0.00995006	0.0848086	0.117324	2268	468.525	1799.48	55	15	37.9151	17.0849	zinc finger protein	3	F:nucleic acid binding; C:nucleus; F:zinc ion binding	-	PF07776	Zinc-finger associated domain (zf-AD)
CPIJ008448			0.00832971	0.0085476	0.0369464	0.231351	1299	218.525	1080.47	17	9	7.9295	9.0705	conserved hypothetical protein	4	F:sequence-specific DNA binding transcription factor activity; F:sequence-specific DNA binding; C:nucleus; P:regulation of transcription, DNA-dependent	-	PF05920	Homeobox KN domain
CPIJ801918			0.00832141	0.00981821	0.162782	0.0603151	477	116.484	360.516	20	3	16.8538	3.14617	EKN1	0	-		PF13414	TPR repeat
CPIJ004388			0.00831467	0.00907598	0.0935824	0.0969839	438	77.192	360.808	10	3	6.8808	3.1192	membrane glycoprotein lig-1	0	-		PF13855	Leucine rich repeat
CPIJ002676			0.0083096	0.00853497	0.0399644	0.213565	465	103.972	361.028	7	3	4.01935	2.98065	glutathione s-transferase d7	1	F:transferase activity	-	PF00043	Glutathione S-transferase, C-terminal domain
CPIJ015214			0.008299	0.00924319	0.0470433	0.196482	348	107.007	240.993	7	2	4.85268	2.14732	zinc finger protein 358	3	F:nucleic acid binding; C:nucleus; F:zinc ion binding	-	PF13465	Zinc-finger double domain
CPIJ011569			0.00829865	0.0101771	0.054616	0.18634	288	46.9966	241.003	5	2	2.5568	2.4432	dzip1l-like protein	2	C:intracellular; F:zinc ion binding	-	PF13815	Iguana/Dzip1-like DAZ-interacting protein N-terminal
CPIJ802328			0.00829752	0.00805379	0.119613	0.0673322	471	109.446	361.554	14	3	11.4526	2.54741	conserved hypothetical protein	3	F:carbohydrate binding; P:hexose metabolic process; F:isomerase activity	-	PF01263	Aldose 1-epimerase
CPIJ004062			0.00829605	0.00991685	0.105527	0.0939745	429	67.3821	361.618	10	3	6.64748	3.35252	anopheles gambiae pest agap012914-pa	3	P:protein folding; C:prefoldin complex; F:unfolded protein binding	-	PF02996	Prefoldin subunit
CPIJ014922			0.00829467	0.00883319	0.0480026	0.184015	531	169.322	361.678	11	3	7.89626	3.10374	bax inhibitor	1	C:integral to membrane	-	PF01027	Inhibitor of apoptosis-promoting Bax1
CPIJ004716			0.00828841	0.00846293	0.114713	0.0737748	474	112.049	361.951	15	3	12.1132	2.88676	zinc finger protein 266	3	F:nucleic acid binding; C:nucleus; F:zinc ion binding	-	PF00096	Zinc finger, C2H2 type
CPIJ020044			0.00828658	0.00912955	0.0256271	0.356246	273	31.6461	241.354	3	2	0.807109	2.19289	conserved hypothetical protein	0	-		PF10225	Uncharacterized conserved protein (DUF2215)
CPIJ013876			0.00828408	0.00865364	0.0565109	0.153132	762	158.433	603.567	14	5	8.84189	5.15811	dna polymerase theta	5	F:DNA-directed DNA polymerase activity; P:DNA replication; F:ATP-dependent helicase activity; F:DNA binding; F:ATP binding	EC:2.7.7.7	PF00270	DEAD/DEAH box helicase
CPIJ007977			0.00828303	0.010415	0.0358388	0.290606	837	233.356	603.644	14	5	7.99206	6.00794	conserved hypothetical protein	3	F:nucleic acid binding; C:nucleus; F:zinc ion binding	-	PF13894	C2H2-type zinc finger
CPIJ012026			0.00827465	0.00844481	0.111597	0.0756723	708	103.745	604.255	16	5	11.1053	4.89465	ribosome-binding factor mitochondrial-like	1	P:rRNA processing	-	PF02033	Ribosome-binding factor A
CPIJ800147			0.00827094	0.00968916	0.0981244	0.0987436	1272	304.758	967.242	37	8	28.1713	8.82869	cytochrome p450 mitochondrial	6	F:heme binding; F:oxidoreductase activity, acting on paired donors, with incorporation or reduction of molecular oxygen; F:monooxygenase activity; F:iron ion binding; F:electron carrier activity; P:oxidation-reduction process	-	PF00067	Cytochrome P450
CPIJ003694			0.00826535	0.00868005	0.112688	0.0770275	792	187.065	604.935	24	5	19.2139	4.78607	ecdysteroid udp-glucosyltransferase	2	F:transferase activity, transferring hexosyl groups; P:metabolic process	EC:2.4.1.0	PF00201	UDP-glucoronosyl and UDP-glucosyl transferase
CPIJ001673			0.00825999	0.00858141	0.0172456	0.4976	297	54.8685	242.131	3	2	0.938709	2.06129	aprataxin	4	F:zinc ion binding; C:intracellular; P:metabolic process; F:catalytic activity	-	PF11969	Scavenger mRNA decapping enzyme C-term binding
CPIJ006248			0.00825573	0.00907446	0.00508345	1.7851	627	142.488	484.512	5	4	0.707217	4.29278	aldo-keto reductase	2	P:oxidation-reduction process; F:oxidoreductase activity	-	PF00248	Aldo/keto reductase family
CPIJ005469			0.0082512	0.0103519	0.032939	0.314274	321	78.6106	242.389	5	2	2.53931	2.46069	insulin receptor	5	F:transmembrane receptor protein tyrosine kinase activity; P:protein phosphorylation; F:ATP binding; C:membrane; P:transmembrane receptor protein tyrosine kinase signaling pathway	EC:2.7.10.1	PF01030	Receptor L domain
CPIJ013172			0.00822885	0.0102501	0.0738704	0.138758	1641	304.243	1336.76	35	11	21.7437	13.2563	alpha-glucosidase	3	P:carbohydrate metabolic process; F:cation binding; F:catalytic activity	-	PF00128	Alpha amylase, catalytic domain
CPIJ005910			0.00822531	0.0080603	0.0447864	0.179972	171	49.4242	121.576	3	1	2.07943	0.920571	kda basic salivary peptide	0	-
CPIJ014192			0.00821822	0.00838132	0.0389218	0.215337	792	183.596	608.404	12	5	7.00286	4.99714	conserved hypothetical protein	3	C:extracellular region; F:chitin binding; P:chitin metabolic process	-	PF01607	Chitin binding Peritrophin-A domain
CPIJ801441			0.00821224	0.00803494	0.136715	0.0587714	327	83.4606	243.539	12	2	10.2433	1.75669	conserved possible golgi protein	0	-		PF06747	CHCH domain
CPIJ001474			0.00820729	0.00803541	0.0731398	0.109864	2232	526.202	1705.8	50	14	36.8692	13.1308	zinc finger protein 449	3	F:zinc ion binding; F:nucleic acid binding; C:intracellular	-	PF13894	C2H2-type zinc finger
CPIJ010120			0.00820706	0.0109814	0.313213	0.0350606	444	78.4613	365.539	23	3	19.7706	3.22937	conserved hypothetical protein	0	-
CPIJ015073			0.00820291	0.0083962	0.0510606	0.164436	936	204.552	731.448	16	6	10.0756	5.92442	zinc finger protein 132	3	F:nucleic acid binding; C:nucleus; F:zinc ion binding	-	PF13465	Zinc-finger double domain
CPIJ004980			0.00819211	0.00872872	0.157639	0.0553716	3642	834.424	2807.58	142	23	119.699	22.3009	atp-binding cassette sub-family a member 3	3	P:ATP catabolic process; F:ATP binding; F:ATPase activity	EC:3.6.1.3	PF00005	ABC transporter
CPIJ014690			0.00818093	0.00920868	0.0131569	0.699914	303	58.5292	244.471	3	2	0.764629	2.23537	ubiquitin specific peptidase 14	3	P:ubiquitin-dependent protein catabolic process; F:cysteine-type peptidase activity; F:ubiquitin thiolesterase activity	EC:3.1.2.15	PF00443	Ubiquitin carboxyl-terminal hydrolase
CPIJ011231			0.00818029	0.00891127	0.0513027	0.1737	1506	283.55	1222.45	25	10	14.295	10.705	zinc finger protein 323	3	F:nucleic acid binding; C:nucleus; F:zinc ion binding	-	PF00096	Zinc finger, C2H2 type
CPIJ013907			0.00817862	0.00975691	0.0369401	0.264128	2016	548.757	1467.24	34	12	19.9272	14.0728	conserved hypothetical protein	0	-
CPIJ004460			0.00817819	0.00956538	0.144649	0.0661281	1212	233.788	978.212	41	8	32.1142	8.88577	tubulin-specific chaperone	0	-		PF00560	Leucine Rich Repeat
CPIJ011615			0.00817515	0.00820917	0.0546331	0.15026	1185	206.425	978.575	19	8	11.0961	7.90394	conserved hypothetical protein	3	F:protein-hormone receptor activity; C:integral to membrane; P:G-protein coupled receptor signaling pathway		PF12796	Ankyrin repeats (3 copies)
CPIJ017116			0.00817281	0.00959818	0.100153	0.0958353	1050	193.501	856.499	26	7	18.2559	7.74412	juvenile hormone-inducible	1	F:transferase activity, transferring phosphorus-containing groups	-	PF02958	Ecdysteroid kinase
CPIJ011915			0.00817076	0.00863719	0.112864	0.0765277	792	180.062	611.938	24	5	19.0464	4.95357	multisynthetase auxiliary p38	0	-
CPIJ801606			0.00815867	0.00845332	0.0531694	0.158988	663	172.724	490.276	13	4	8.95757	4.04243	lysosomal acid phosphatase	1	F:acid phosphatase activity	EC:3.1.3.2	PF00328	Histidine phosphatase superfamily (branch 2)
CPIJ006811			0.00814817	0.00929974	0.0632197	0.147102	291	45.5457	245.454	5	2	2.789	2.211	salivary c-type lectin	1	F:carbohydrate binding	-	PF00059	Lectin C-type domain
CPIJ004028			0.00814644	0.0109805	0.0589285	0.186336	645	153.988	491.012	14	4	8.78207	5.21793	venom allergen 3	0	-		PF00188	Cysteine-rich secretory protein family
CPIJ001510			0.00814332	0.00870275	0.0830544	0.104784	1878	404.396	1473.6	44	12	31.8419	12.1581	zinc finger protein 333	3	F:nucleic acid binding; C:nucleus; F:zinc ion binding	-	PF00096	Zinc finger, C2H2 type
CPIJ002269		X	0.00813104	0.0144062	0.0915678	0.157328	1056	195.102	860.898	28	7	16.5268	11.4732	gastrula zinc finger protein	2	F:zinc ion binding; C:intracellular	-	PF13894	C2H2-type zinc finger
CPIJ020292			0.00813056	0.00866624	0.0268511	0.322752	834	219.036	614.964	11	5	5.77077	5.22923	conserved hypothetical protein	2	C:nucleus; F:zinc ion binding	-	PF07776	Zinc-finger associated domain (zf-AD)
CPIJ010636			0.00811673	0.00872862	0.167038	0.0522552	474	104.393	369.607	18	3	15.1897	2.81026	male-specific lethal 2-like protein	2	F:zinc ion binding; F:metal ion binding	-
CPIJ010431			0.00811279	0.00866565	0.0887051	0.0976906	2235	509.33	1725.67	55	14	41.3227	13.6773	rnase h	2	F:nucleic acid binding; F:zinc ion binding	-
CPIJ011905			0.00810435	0.00939045	0.307268	0.0305611	294	47.2186	246.781	14	2	12.0718	1.92815	conserved hypothetical protein	0	-		PF11527	The ARF-like 2 binding protein BART
CPIJ801853			0.0081033	0.0111636	0.0673352	0.165791	312	65.1873	246.813	7	2	4.3005	2.6995	trna-splicing endonuclease subunit sen2	4	P:nucleic acid phosphodiester bond hydrolysis; F:nucleic acid binding; P:tRNA splicing, via endonucleolytic cleavage and ligation; F:tRNA-intron endonuclease activity	EC:3.1.27.9	PF01974	tRNA intron endonuclease, catalytic C-terminal domain
CPIJ008363			0.00810319	0.00836577	0.127595	0.0655648	891	150.551	740.449	24	6	18.1479	5.85208	dna replication licensing factor mcm1	3	P:DNA replication; F:DNA binding; F:ATP binding	-	PF00493	MCM2/3/5 family
CPIJ006074			0.00809787	0.0116401	0.0242108	0.480782	489	118.532	370.468	7	3	2.79701	4.20299	trypsin beta	2	F:serine-type endopeptidase activity; P:proteolysis	EC:3.4.21.0	PF00089	Trypsin
CPIJ018503			0.00808924	0.00869854	0.0173833	0.500397	774	155.895	618.105	8	5	2.68095	5.31905	conserved hypothetical protein	0	-		PF10184	Uncharacterized conserved protein (DUF2358)
CPIJ013396			0.00808543	0.00774452	0.0679224	0.11402	816	197.604	618.396	17	5	12.5293	4.47072	urokinase-type plasminogen activator	4	F:kinase activity; P:phosphorylation; P:proteolysis; F:serine-type endopeptidase activity	EC:3.4.21.0	PF00089	Trypsin
CPIJ002015			0.0080837	0.0083729	0.0473712	0.176751	456	84.883	371.117	7	3	3.94862	3.05138	carbonic anhydrase	4	F:metal ion binding; P:one-carbon metabolic process; F:zinc ion binding; F:carbonate dehydratase activity	EC:4.2.1.1	PF00194	Eukaryotic-type carbonic anhydrase
CPIJ011093			0.00808129	0.00825458	0.0104374	0.790864	813	194.287	618.713	7	5	1.98947	5.01053	conserved hypothetical protein	0	-		PF13903	PMP-22/EMP/MP20/Claudin tight junction
CPIJ010799			0.00807618	0.00794484	0.0827769	0.0959789	1242	251.433	990.567	27	8	19.5918	7.4082	carboxypeptidase b	3	P:proteolysis; F:metallocarboxypeptidase activity; F:zinc ion binding	EC:3.4.17.0	PF00246	Zinc carboxypeptidase
CPIJ802225			0.00807419	0.0084935	0.0882492	0.0962444	813	193.743	619.257	21	5	16.0597	4.94035	testis development protein nyd-sp29	0	-		PF00400	WD domain, G-beta repeat
CPIJ011642			0.00806699	0.0091357	0.0324619	0.281428	1623	383.384	1239.62	23	10	12.0422	10.9578	conserved hypothetical protein	0	-
CPIJ009700			0.00806045	0.00963471	0.0539723	0.178512	315	66.8748	248.125	6	2	3.60939	2.39061	conserved hypothetical protein	1	F:zinc ion binding		PF00646	F-box domain
CPIJ005082			0.00806004	0.00688538	0.109644	0.0627976	783	162.656	620.344	21	5	16.9423	4.05769	pyrroline-5-carboxylate reductase	4	F:pyrroline-5-carboxylate reductase activity; P:L-proline biosynthetic process; P:oxidation-reduction process; F:nucleotide binding	EC:1.5.1.2	PF03807	NADP oxidoreductase coenzyme F420-dependent
CPIJ010594			0.00805644	0.0100014	0.042423	0.235755	594	97.5026	496.497	9	4	4.08998	4.91002	hypothetical protein CpipJ_CPIJ010594	0	-
CPIJ001581			0.00805406	0.00931941	0.0365979	0.254643	765	144.195	620.805	11	5	5.24728	5.75272	myosin heavy chain	0	-
CPIJ801493			0.00804929	0.00823859	0.0544392	0.151335	3423	938.315	2484.69	68	20	48.5457	19.4543	conserved hypothetical protein	2	F:zinc ion binding; C:nucleus	-	PF07776	Zinc-finger associated domain (zf-AD)
CPIJ009407			0.00804911	0.0105332	0.0223231	0.47185	879	257.813	621.187	12	5	5.61562	6.38438	helicase conserved c-terminal domain containing protein	4	F:chitin binding; C:extracellular region; P:chitin metabolic process; F:structural constituent of cell wall	-	PF01607	Chitin binding Peritrophin-A domain
CPIJ802252			0.00804784	0.0087623	0.0760143	0.115272	483	110.229	372.771	11	3	7.91468	3.08532	conserved hypothetical protein	3	F:protein kinase activity; P:protein phosphorylation; F:ATP binding	-	PF02958	Ecdysteroid kinase
CPIJ014510			0.00803592	0.00867336	0.0364125	0.238197	630	132.235	497.765	9	4	4.74525	4.25475	zinc finger protein	3	F:nucleic acid binding; C:nucleus; F:zinc ion binding	-	PF00096	Zinc finger, C2H2 type
CPIJ006542			0.00803013	0.00966426	0.152372	0.0634253	501	127.407	373.593	21	3	17.7069	3.29314	urokinase-type plasminogen activator	4	F:kinase activity; P:phosphorylation; P:proteolysis; F:serine-type endopeptidase activity	EC:3.4.21.0	PF00089	Trypsin
CPIJ802117			0.00802869	0.00904093	0.0438272	0.206285	1401	280.022	1120.98	22	9	12.0495	9.95048	conserved hypothetical protein	2	C:membrane; F:growth factor activity	-
CPIJ800224			0.00802799	0.00929099	0.0780211	0.119083	1317	320.486	996.514	32	8	23.353	8.64701	cytochrome p450 9b2	6	F:heme binding; F:oxidoreductase activity, acting on paired donors, with incorporation or reduction of molecular oxygen; F:monooxygenase activity; F:iron ion binding; F:electron carrier activity; P:oxidation-reduction process	-	PF00067	Cytochrome P450
CPIJ005846			0.00802098	0.00956153	0.141156	0.0677372	1551	304.267	1246.73	50	10	39.1373	10.8627	arc cg6741-pb	0	-
CPIJ008784			0.00801987	0.00892623	0.0575433	0.155122	675	176.239	498.761	14	4	9.72898	4.27102	peroxisome assembly protein 12	4	C:integral to peroxisomal membrane; P:protein targeting to peroxisome; F:protein C-terminus binding; F:zinc ion binding	-	PF04757	Pex2 / Pex12 amino terminal region
CPIJ012899			0.00801913	0.00960978	0.060888	0.157827	789	165.491	623.509	16	5	10.0337	5.96635	secreted protein	0	-
CPIJ005783			0.00801841	0.00990067	0.0617656	0.160294	171	46.2872	124.713	4	1	2.79352	1.20648	signal peptidase complex subunit 1	4	F:peptidase activity; P:signal peptide processing; C:integral to membrane; C:signal peptidase complex	-	PF06645	Microsomal signal peptidase 12 kDa subunit (SPC12)
CPIJ003363			0.00801491	0.00895064	0.125486	0.0713279	1233	234.86	998.14	36	8	27.6256	8.37439	conserved hypothetical protein	2	F:zinc ion binding; C:nucleus
CPIJ012516			0.00801282	0.00798441	0.000159688	50	294	44.3997	249.6	2	2	0.0070901	1.99291	piwi	1	F:nucleic acid binding	-	PF02171	Piwi domain
CPIJ008059			0.00800566	0.00994859	0.162381	0.061267	777	152.442	624.558	29	5	23.1812	5.81877	conserved hypothetical protein	0	-		PF10512	Cell division cycle-associated protein 8
CPIJ008793			0.00800532	0.00807638	0.000161528	50	147	22.0827	124.917	1	1	0.00352311	0.996477	odorant-binding protein 56a	1	F:odorant binding	-	PF01395	PBP/GOBP family
CPIJ004601			0.00799768	0.00870458	0.0465742	0.186897	504	128.891	375.109	9	3	5.82931	3.17069	serine 3-dehydrogenase	3	F:oxidoreductase activity; P:oxidation-reduction process; F:nucleotide binding	-	PF00106	short chain dehydrogenase
CPIJ015549			0.00799592	0.0101641	0.0628009	0.161847	1194	193.494	1000.51	22	8	11.9769	10.0231	ribosomal biogenesis protein gar2	2	F:nucleic acid binding; F:nucleotide binding	-	PF00076	RNA recognition motif. (a.k.a. RRM, RBD, or RNP domain)
CPIJ015265			0.00798944	0.00869803	0.0169915	0.511904	843	217.174	625.826	9	5	3.63615	5.36385	zinc finger protein 345	3	F:nucleic acid binding; C:intracellular; F:zinc ion binding	-	PF14260	C4-type zinc-finger of DNA polymerase delta
CPIJ011999			0.00798931	0.00943123	0.171553	0.0549756	1119	242.829	876.171	46	7	38.3857	7.61427	zinc carboxypeptidase a 1	3	P:proteolysis; F:metallocarboxypeptidase activity; F:zinc ion binding	EC:3.4.17.0	PF00246	Zinc carboxypeptidase
CPIJ802411			0.00797834	0.00775279	0.0225398	0.343961	558	181.982	376.018	7	3	4.09189	2.90811	pre-mrna splicing factor prp17	0	-
CPIJ006286			0.00795677	0.00838768	0.076724	0.109323	1932	423.855	1508.15	43	12	30.9578	12.0422	tektin	2	P:microtubule cytoskeleton organization; C:microtubule	-	PF03148	Tektin family
CPIJ005970			0.00795298	0.00775838	0.0977658	0.0793568	354	102.522	251.478	11	2	9.20768	1.79232	pban_aedae ame: full=pban-type neuropeptides ame: full=pheromone pyrokinin biosynthesis-activating neuropeptide contains: ame: full=aaamwfgprl-amide ame: full=pyrokinin-1 contains: ame: full=qpqpvfyhsttprl-amide contains: ame: full=dasssnennsrppfaprl-amide ame: full=pyrokinin-2 contains: ame: full=nlpfsprl-amide ame: full=pyrokinin-3 flags: precursor	5	F:neuropeptide hormone activity; P:pheromone biosynthetic process; F:myostimulatory hormone activity; C:extracellular region; P:neuropeptide signaling pathway	-	PF05874	Pheromone biosynthesis activating neuropeptide (PBAN)
CPIJ015687			0.00794527	0.00952315	0.0539395	0.176552	969	213.834	755.166	18	6	11.0871	6.91286	conserved hypothetical protein	2	F:serine-type endopeptidase activity; P:proteolysis	EC:3.4.21.0	PF00089	Trypsin
CPIJ014364			0.00793895	0.0105708	0.0143906	0.734568	630	126.155	503.845	7	4	1.77947	5.22053	lamin	0	-
CPIJ001098			0.00792959	0.009881	0.0280253	0.352574	1806	418.789	1387.21	25	11	11.532	13.468	ion channel nompc	0	-		PF12796	Ankyrin repeats (3 copies)
CPIJ018629			0.00792566	0.0111126	0.126347	0.087953	651	146.31	504.69	22	4	16.8791	5.12094	glutathione-s-transferase gst	1	F:transferase activity	-	PF13417	Glutathione S-transferase, N-terminal domain
CPIJ017734			0.00791954	0.010412	0.138315	0.0752773	1269	258.842	1010.16	44	8	34.0089	9.99107	dna photolyase	2	P:DNA repair; F:DNA photolyase activity	-	PF03441	FAD binding domain of DNA photolyase
CPIJ012809			0.00791766	0.00894608	0.046239	0.193475	1299	288.603	1010.4	21	8	12.5197	8.48029	conserved hypothetical protein	2	F:metal ion binding; F:zinc ion binding
CPIJ801394			0.00791399	0.00679615	0.133644	0.0508527	339	86.2827	252.717	11	2	9.574	1.426	conserved hypothetical protein	0	-
CPIJ009710			0.00790486	0.00804465	0.000161605	49.7798	297	43.9906	253.009	2	2	0.00696123	1.99304	conserved hypothetical protein	0	-
CPIJ017414			0.00789227	0.00928289	0.134299	0.0691212	672	165.175	506.825	25	4	20.6255	4.3745	trypsin 4	2	P:proteolysis; F:serine-type endopeptidase activity	EC:3.4.21.0	PF00089	Trypsin
CPIJ010876			0.00789092	0.00790943	0.0271552	0.291267	534	153.816	380.184	7	3	4.06996	2.93004	conserved hypothetical protein	2	P:signal transduction; C:intracellular
CPIJ006621			0.00788072	0.00876374	0.0390971	0.224153	330	76.2156	253.784	5	2	2.86305	2.13695	potassium sodium hyperpolarization-activated cyclic nucleotide-gated channel 2-like	0	-		PF00027	Cyclic nucleotide-binding domain
CPIJ015679			0.00787847	0.00850322	0.0545617	0.155846	633	125.287	507.713	11	4	6.74206	4.25794	conserved hypothetical protein	0	-		PF13855	Leucine rich repeat
CPIJ006070			0.00787707	0.00818973	0.0869683	0.0941691	1224	335.345	888.655	34	7	27.2099	6.79011	conserved hypothetical protein	6	F:helicase activity; F:nucleic acid binding; F:ATP binding; F:hydrolase activity; P:DNA recombination; F:ATP-dependent helicase activity
CPIJ002821			0.00787488	0.0102131	0.0798104	0.127967	300	46.0279	253.972	6	2	3.51681	2.48319	conserved hypothetical protein	2	F:zinc ion binding; F:metal ion binding	-	PF00856	SET domain
CPIJ013056			0.00785862	0.00934584	0.101053	0.0924847	756	119.756	636.244	17	5	11.399	5.60096	rhodopsin	7	F:G-protein coupled receptor activity; P:phototransduction; P:protein-chromophore linkage; P:G-protein coupled receptor signaling pathway; F:photoreceptor activity; P:visual perception; C:integral to membrane	-	PF00001	7 transmembrane receptor (rhodopsin family)
CPIJ019682			0.00785717	0.00760918	0.0902943	0.0842708	483	101.183	381.817	11	3	8.34598	2.65402	conserved hypothetical protein	1	F:transferase activity, transferring phosphorus-containing groups	-	PF02958	Ecdysteroid kinase
CPIJ019690			0.00784172	0.00857975	0.0850653	0.100861	960	194.862	765.138	22	6	15.7589	6.24109	maltodextrin glucosidase	3	P:carbohydrate metabolic process; F:cation binding; F:catalytic activity	-	PF00128	Alpha amylase, catalytic domain
CPIJ802681			0.00783845	0.00777438	0.0642603	0.120983	1335	314.392	1020.61	27	8	19.3862	7.61382	conserved hypothetical protein	0	-		PF00560	Leucine Rich Repeat
CPIJ007451			0.00783679	0.00863281	0.100733	0.0857001	447	64.19	382.81	9	3	5.95597	3.04403	conserved hypothetical protein	0	-
CPIJ005534			0.00783433	0.00789711	0.101456	0.0778381	504	121.07	382.93	15	3	12.0367	2.96334	short-chain dehydrogenase	3	F:oxidoreductase activity; P:oxidation-reduction process; F:nucleotide binding	-	PF00106	short chain dehydrogenase
CPIJ013363			0.00783349	0.00834523	0.0436512	0.19118	3309	755.859	2553.14	53	20	32.2038	20.7962	conserved hypothetical protein	8	P:protein import; F:endonuclease activity; F:manganese ion binding; P:double-strand break repair; F:ATP binding; F:exonuclease activity; C:membrane; C:nucleus	-	PF07517	SecA DEAD-like domain
CPIJ003593			0.00783231	0.0101297	0.120967	0.0837395	1278	256.588	1021.41	39	8	29.2497	9.75027	dna repair protein xp-c rad4	3	F:damaged DNA binding; P:nucleotide-excision repair; C:nucleus	-	PF01841	Transglutaminase-like superfamily
CPIJ013666			0.00782322	0.00779733	0.10896	0.0715612	555	171.526	383.474	19	3	16.3795	2.62049	hypothetical protein CpipJ_CPIJ013666	0	-
CPIJ003220		X	0.00782209	0.0119221	0.0627325	0.190047	474	90.4714	383.529	10	3	5.53817	4.46183	conserved hypothetical protein	2	F:zinc ion binding; C:intracellular	-	PF13894	C2H2-type zinc finger
CPIJ000251			0.00781653	0.00876546	0.0190383	0.460412	2580	660.989	1919.01	29	15	12.4107	16.5893	conserved hypothetical protein	0	-		PF05444	Protein of unknown function (DUF753)
CPIJ801652			0.0078138	0.0078809	0.084003	0.093817	456	72.0641	383.936	9	3	6.00069	2.99931	lysozyme i-1	1	F:lysozyme activity	EC:3.2.1.17	PF05497	Destabilase
CPIJ802496			0.0078046	0.00856486	0.126918	0.0674837	939	170.223	768.777	27	6	20.6932	6.3068	conserved hypothetical protein	1	F:catalytic activity	-	PF13855	Leucine rich repeat
CPIJ802332			0.00779706	0.00885484	0.13006	0.0680827	669	155.986	513.014	23	4	18.7922	4.20782	AAEL017326-PA	0	-
CPIJ009610			0.00779401	0.00632013	0.106823	0.0591644	789	147.482	641.518	18	5	14.3158	3.68422	udp-glucose pyrophosphatase	2	F:hydrolase activity, acting on acid anhydrides, in phosphorus-containing anhydrides; F:metal ion binding	EC:3.6.1.0	PF00293	NUDIX domain
CPIJ000559			0.00778905	0.00798626	0.0323854	0.246601	513	127.844	385.156	7	3	4.01622	2.98378	conserved hypothetical protein	1	F:N-acetyltransferase activity	-	PF00583	Acetyltransferase (GNAT) family
CPIJ003072			0.00778299	0.0078528	0.105152	0.0746802	624	110.059	513.941	15	4	11.1215	3.87846	lsm11 protein	0	-		PF01423	LSM domain
CPIJ016967			0.00777774	0.00789763	0.046477	0.169925	348	90.8564	257.144	6	2	4.05152	1.94848	odorant-binding protein 56e	1	F:odorant binding	-	PF01395	PBP/GOBP family
CPIJ019331			0.00777338	0.00773439	0.0853246	0.0906467	615	100.423	514.577	12	4	8.19401	3.80599	sulfate transporter	3	F:sulfate transmembrane transporter activity; C:integral to membrane; P:sulfate transport	-	PF13792	Sulfate transporter N-terminal domain with GLY motif
CPIJ013700			0.00777032	0.00815116	0.0544927	0.149583	978	205.831	772.169	17	6	10.8894	6.11061	conserved hypothetical protein	1	F:zinc ion binding	-	PF12937	F-box-like
CPIJ008590			0.00776554	0.00781658	0.000156332	50	156	27.2255	128.774	1	1	0.0042106	0.995789	hypothetical protein CpipJ_CPIJ008590	0	-
CPIJ005214			0.00776307	0.00777075	0.000168503	46.1163	306	48.3695	257.63	2	2	0.00810934	1.99189	ceramide glucosyltransferase	1	F:transferase activity, transferring glycosyl groups	-	PF13506	Glycosyl transferase family 21
CPIJ008304			0.00774392	0.00788989	0.0240266	0.328382	777	131.332	645.668	8	5	3.05995	4.94005	zinc finger protein 322a	3	F:nucleic acid binding; C:nucleus; F:zinc ion binding	-	PF13465	Zinc-finger double domain
CPIJ000370			0.00773386	0.00820257	0.0348646	0.235269	822	175.492	646.508	11	5	5.89267	5.10733	conserved hypothetical protein	3	P:oxidation-reduction process; F:acyl-CoA dehydrogenase activity; F:oxidoreductase activity, acting on the CH-CH group of donors
CPIJ008588			0.00773314	0.00771856	0.0779821	0.0989787	831	184.432	646.568	19	5	14.1055	4.89449	mrna turnover protein 4	2	C:ribosome; P:ribosome biogenesis	-	PF00466	Ribosomal protein L10
CPIJ002764			0.00773253	0.00772292	0.0407345	0.189592	1224	189.413	1034.59	15	8	7.36896	7.63104	cellular tumor antigen p53	5	F:transcription regulatory region DNA binding; P:apoptotic process; P:regulation of transcription, DNA-dependent; F:sequence-specific DNA binding transcription factor activity; C:nucleus	-	PF00870	P53 DNA-binding domain
CPIJ007951			0.00772929	0.00923074	0.105172	0.0877683	1611	317.216	1293.78	42	10	30.9286	11.0714	leucyl-trna synthetase	6	F:aminoacyl-tRNA editing activity; F:leucine-tRNA ligase activity; P:regulation of translational fidelity; F:ATP binding; P:leucyl-tRNA aminoacylation; C:cytoplasm	EC:6.1.1.4	PF09334	tRNA synthetases class I (M)
CPIJ802119			0.00772847	0.00794727	0.0445592	0.178353	816	169.041	646.959	12	5	7.13183	4.86817	dhfr-coamplified protein	0	-		PF10223	Uncharacterized conserved protein (DUF2181)
CPIJ004586			0.00771931	0.00829799	0.0894816	0.092734	645	126.819	518.181	15	4	10.8782	4.12184	conserved hypothetical protein	0	-
CPIJ801685			0.00771881	0.0081244	0.0528094	0.153844	1200	293.124	906.876	22	7	14.9055	7.09451	zinc carboxypeptidase	3	P:proteolysis; F:metallocarboxypeptidase activity; F:zinc ion binding	EC:3.4.17.0	PF00246	Zinc carboxypeptidase
CPIJ011604			0.00771608	0.00900101	0.13336	0.067494	297	37.8011	259.199	7	2	4.78534	2.21466	conserved hypothetical protein	1	F:DNA binding	-	PF02944	BESS motif
CPIJ010315			0.0077098	0.00848224	0.125699	0.0674807	345	85.5902	259.41	12	2	9.96245	2.03755	juvenile hormone-inducible	1	F:transferase activity, transferring phosphorus-containing groups		PF02958	Ecdysteroid kinase
CPIJ014127			0.00770776	0.00805291	0.0558415	0.14421	480	90.7817	389.218	8	3	4.94349	3.05651	conserved hypothetical protein	0	-
CPIJ801794			0.00769569	0.0083974	0.13972	0.0601015	867	217.286	649.714	33	5	27.973	5.02705	short-chain specific acyl- mitochondrial	3	F:flavin adenine dinucleotide binding; F:acyl-CoA dehydrogenase activity; P:oxidation-reduction process	EC:1.3.99.3	PF02770	Acyl-CoA dehydrogenase, middle domain
CPIJ005888			0.00768195	0.00764209	0.0646097	0.118281	768	117.124	650.876	12	5	7.24067	4.75933	conserved hypothetical protein	0	-		PF01683	EB module
CPIJ018272			0.00768124	0.0108504	0.0987623	0.109864	474	83.4382	390.562	12	3	7.92468	4.07532	zinc finger protein	3	F:nucleic acid binding; C:nucleus; F:zinc ion binding	-	PF13912	C2H2-type zinc finger
CPIJ008951			0.00768061	0.00728281	0.0225342	0.32319	762	241.208	520.792	9	4	5.30099	3.69901	lupus la ribonucleoprotein	2	F:nucleic acid binding; C:ribonucleoprotein complex	-
CPIJ008863			0.00767829	0.00815785	0.0849781	0.0959995	798	146.813	651.187	17	5	11.9231	5.0769	conserved hypothetical protein	0	-
CPIJ004248			0.00767804	0.00782012	0.0582179	0.134325	348	87.5175	260.483	7	2	5.00072	1.99928	ordml	1	C:integral to membrane	-	PF04061	ORMDL family
CPIJ010581			0.00766859	0.00913866	0.0583776	0.156544	1164	251.186	912.814	22	7	14.0227	7.97729	conserved hypothetical protein	0	-
CPIJ008297			0.00765174	0.00777887	0.0972176	0.080015	738	84.5536	653.446	12	5	7.41486	4.58514	zinc finger protein 501	3	F:nucleic acid binding; C:nucleus; F:zinc ion binding	-	PF07776	Zinc-finger associated domain (zf-AD)
CPIJ010559			0.00764988	0.00804312	0.0365525	0.220043	504	111.837	392.163	7	3	3.95124	3.04876	zinc finger protein 774	3	F:zinc ion binding; F:nucleic acid binding; C:intracellular	-	PF00096	Zinc finger, C2H2 type
CPIJ006930			0.00764921	0.00817969	0.132614	0.0616805	633	110.07	522.93	18	4	13.9207	4.07929	gamma-glutamyl hydrolase	2	P:glutamine metabolic process; F:omega peptidase activity	EC:3.4.19.0	PF07722	Peptidase C26
CPIJ001831			0.00764179	0.010698	0.0766349	0.139597	546	153.422	392.578	15	3	11.0521	3.94785	cuticle protein	1	F:structural constituent of cuticle	-	PF00379	Insect cuticle protein
CPIJ010830			0.00763468	0.00948133	0.168239	0.0563562	1251	203.151	1047.85	40	8	30.9913	9.00867	conserved hypothetical protein	2	P:growth; F:growth factor activity	-	PF00688	TGF-beta propeptide
CPIJ002800			0.00763068	0.00860636	0.129091	0.0666689	327	64.8997	262.1	10	2	7.8787	2.1213	larval pupal cuticle protein h1c	0	-		PF11018	Pupal cuticle protein C1
CPIJ019420			0.00762703	0.0078573	0.0406283	0.193395	1143	225.211	917.789	16	7	8.94789	7.05211	transcriptional regulator atrx	1	F:nucleic acid binding	-
CPIJ800265			0.00762647	0.00779613	0.0670257	0.116316	1176	258.144	917.856	23	7	16.2709	6.72914	cytochrome p450	6	F:heme binding; F:oxidoreductase activity, acting on paired donors, with incorporation or reduction of molecular oxygen; F:monooxygenase activity; F:iron ion binding; F:electron carrier activity; P:oxidation-reduction process	-	PF00067	Cytochrome P450
CPIJ019358			0.00762576	0.00850225	0.15201	0.0559323	339	76.7306	262.269	13	2	10.9135	2.08645	cdk5 regulatory subunit-associated protein 1	4	C:cytoplasm; P:tRNA modification; F:transferase activity; F:4 iron, 4 sulfur cluster binding	-	PF00919	Uncharacterized protein family UPF0004
CPIJ016339			0.00762349	0.00794276	0.0675199	0.117636	357	94.6525	262.347	8	2	6.03295	1.96705	liver carboxylesterase 1	1	F:hydrolase activity	-	PF00135	Carboxylesterase family
CPIJ020008			0.0076207	0.00761283	0.000152257	50	276	13.5567	262.443	2	2	0.0020641	1.99794	conserved hypothetical protein	0	-		PF07647	SAM domain (Sterile alpha motif)
CPIJ014679			0.00761529	0.00927531	0.13753	0.067442	831	174.426	656.574	28	5	22.331	5.66904	aael005029- partial	3	F:nucleic acid binding; C:nucleus; F:zinc ion binding	-	PF13465	Zinc-finger double domain
CPIJ008835			0.00761386	0.0094106	0.197473	0.0476552	324	61.3206	262.679	13	2	10.7961	2.20392	pupal cuticle protein	1	F:structural constituent of cuticle	-	PF00379	Insect cuticle protein
CPIJ004599			0.00760587	0.00808682	0.171468	0.0471623	516	121.568	394.432	21	3	18.213	2.78695	serine 3-dehydrogenase	3	F:oxidoreductase activity; P:oxidation-reduction process; F:nucleotide binding	-	PF00106	short chain dehydrogenase
CPIJ019191		X	0.0076037	0.0135084	0.0447337	0.301973	324	60.97	263.03	6	2	2.60559	3.39441	zinc finger protein	3	F:nucleic acid binding; C:nucleus; F:zinc ion binding	-	PF13465	Zinc-finger double domain
CPIJ005723			0.00760056	0.00814757	0.0192612	0.423003	2631	657.459	1973.54	28	15	12.3361	15.6639	conserved hypothetical protein	0	-
CPIJ007401			0.00759887	0.00826064	0.0221541	0.372871	351	87.8031	263.197	4	2	1.88883	2.11117	autophagy-specific protein	0	-
CPIJ004418			0.00759547	0.00874101	0.0456441	0.191503	1353	299.736	1053.26	22	8	13.1505	8.84948	conserved hypothetical protein	0	-
CPIJ008293			0.0075945	0.00761593	0.0629157	0.12105	810	151.629	658.371	14	5	9.17673	4.82327	zinc finger protein 25	3	F:nucleic acid binding; C:nucleus; F:zinc ion binding	-	PF05485	THAP domain
CPIJ010316			0.00759236	0.00776237	0.0927135	0.0837243	1128	206.021	921.979	26	7	18.9135	7.0865	conserved hypothetical protein	1	F:transferase activity, transferring phosphorus-containing groups	-	PF02958	Ecdysteroid kinase
CPIJ001759			0.00758652	0.010071	0.184412	0.0546114	495	99.5624	395.438	20	3	16.4352	3.56484	cytochrome p450 4d1	6	F:heme binding; F:oxidoreductase activity, acting on paired donors, with incorporation or reduction of molecular oxygen; F:monooxygenase activity; F:iron ion binding; F:electron carrier activity; P:oxidation-reduction process	-	PF00067	Cytochrome P450
CPIJ007815			0.00757854	0.00839596	0.0451726	0.185864	372	108.097	263.903	7	2	4.8151	2.1849	conserved hypothetical protein	0	-
CPIJ000295			0.00757816	0.00755625	0.0711275	0.106235	1209	285.293	923.707	26	7	19.3458	6.65422	aarf domain containing kinase 5	2	F:kinase activity; P:phosphorylation	-	PF03109	ABC1 family
CPIJ801484			0.00757038	0.00863069	0.101461	0.0850637	840	179.531	660.469	23	5	17.518	5.48203	isoform b	0	-		PF11976	Ubiquitin-2 like Rad60 SUMO-like
CPIJ009254			0.00756985	0.00841517	0.0567864	0.14819	681	152.588	528.412	13	4	8.59117	4.40883	wd repeat containing protein mip1	0	-
CPIJ011229			0.00756867	0.00910526	0.0301197	0.302302	810	149.382	660.618	10	5	4.27921	5.72079	zinc finger protein 197	3	F:nucleic acid binding; C:intracellular; F:zinc ion binding	-	PF13894	C2H2-type zinc finger
CPIJ015428			0.00756468	0.0101351	0.12166	0.0833067	1143	217.647	925.353	33	7	24.3688	8.63117	cytochrome p450 3a19	6	F:heme binding; F:oxidoreductase activity, acting on paired donors, with incorporation or reduction of molecular oxygen; F:monooxygenase activity; F:iron ion binding; F:electron carrier activity; P:oxidation-reduction process	-	PF00067	Cytochrome P450
CPIJ007939			0.00755849	0.00725663	0.146687	0.0494703	645	115.794	529.206	19	4	15.4964	3.50359	conserved hypothetical protein	0	-
CPIJ011128			0.00754249	0.00747846	0.0471664	0.158555	1527	333.763	1193.24	23	9	14.6791	8.32088	aael002446- partial	0	-
CPIJ002008			0.0075414	0.00652364	0.145724	0.044767	498	100.196	397.804	16	3	13.5854	2.41461	tetraspanin f139	1	C:integral to membrane	-	PF00335	Tetraspanin family
CPIJ005790			0.00753171	0.00882142	0.112018	0.0787501	474	75.6839	398.316	11	3	7.77686	3.22314	conserved hypothetical protein	0	-		PF06916	Protein of unknown function (DUF1279)
CPIJ010691			0.00752924	0.00750216	0.130632	0.0574297	654	122.738	531.262	19	4	15.2173	3.78271	translation initiation factor-3	2	P:translational initiation; F:translation initiation factor activity	-	PF05198	Translation initiation factor IF-3, N-terminal domain
CPIJ004330			0.0075214	0.00848972	0.149475	0.0567971	492	93.138	398.862	16	3	12.8697	3.13032	zinc finger protein xfin-like	2	F:zinc ion binding; C:intracellular	-
CPIJ010614			0.00751959	0.0103638	0.173391	0.0597713	762	97.0698	664.93	22	5	15.6091	6.39091	conserved hypothetical protein	8	F:nucleic acid binding; F:ATP binding; C:cytoplasm; F:lysine-tRNA ligase activity; F:aminoacyl-tRNA ligase activity; F:nucleotide binding; P:tRNA aminoacylation for protein translation; P:lysyl-tRNA aminoacylation
CPIJ013394			0.00751463	0.00764546	0.146779	0.0520882	819	153.631	665.369	25	5	20.3983	4.60168	kdel motif-containing protein 1	3	C:extracellular region; P:protein glycosylation; F:transferase activity, transferring glycosyl groups	-	PF05686	Glycosyl transferase family 90
CPIJ008933			0.00751191	0.00865721	0.0647226	0.133759	537	137.634	399.366	12	3	8.64479	3.35521	conserved hypothetical protein	0	-		PF10419	TFIIIC subunit
CPIJ003009			0.00751073	0.00767164	0.0428113	0.179196	2397	532.996	1864	36	14	22.1308	13.8692	conserved hypothetical protein	2	F:zinc ion binding; C:intracellular	-	PF00641	Zn-finger in Ran binding protein and others
CPIJ005535			0.00749914	0.00817786	0.137844	0.059327	1002	201.908	800.092	33	6	26.7186	6.28136	short-chain dehydrogenase	3	F:oxidoreductase activity; P:oxidation-reduction process; F:nucleotide binding	-	PF00106	short chain dehydrogenase
CPIJ801504			0.00749725	0.00817788	0.0404943	0.201951	885	218.089	666.911	14	5	8.65499	5.34501	zinc finger protein 509	3	F:zinc ion binding; F:nucleic acid binding; C:intracellular	-	PF13912	C2H2-type zinc finger
CPIJ006063			0.00749189	0.0100767	0.0746175	0.135044	630	96.0891	533.911	12	4	6.85572	5.14428	cation transport regulator-like protein 2-like	0	-		PF04752	ChaC-like protein
CPIJ008638			0.00747954	0.00776938	0.0528974	0.146877	1716	379.02	1336.98	30	10	19.7615	10.2385	smad nuclear interacting protein	2	F:double-stranded RNA binding; C:intracellular		PF00498	FHA domain
CPIJ002371			0.00747736	0.00764685	0.0595732	0.128361	1236	299.841	936.159	24	7	17.1335	6.86652	conserved hypothetical protein	2	F:nucleic acid binding; F:nucleotide binding	-	PF00076	RNA recognition motif. (a.k.a. RRM, RBD, or RNP domain)
CPIJ001127			0.00747074	0.00819901	0.173104	0.0473646	339	71.2893	267.711	13	2	11.0369	1.9631	valacyclovir hydrolase	1	F:hydrolase activity	-	PF12697	Alpha/beta hydrolase family
CPIJ006099			0.00746461	0.00791461	0.116267	0.0680728	345	77.0694	267.931	11	2	8.89497	2.10503	conserved hypothetical protein	1	F:nucleotide binding
CPIJ017575			0.00745777	0.00792599	0.19737	0.0401581	753	82.5576	670.442	18	5	13.5734	4.42657	low-density lipoprotein receptor	3	F:calcium ion binding; C:integral to membrane; C:membrane
CPIJ013722			0.00745329	0.0081629	0.0893067	0.0914031	846	175.155	670.845	20	5	14.814	5.186	dimethylaniline monooxygenase	4	F:flavin adenine dinucleotide binding; F:N,N-dimethylaniline monooxygenase activity; P:oxidation-reduction process; F:NADP binding	EC:1.14.13.8	PF00743	Flavin-binding monooxygenase-like
CPIJ019184			0.00745179	0.00743878	0.000148776	49.9999	564	161.412	402.588	3	3	0.0238649	2.97614	aael003737- partial	0	-		PF13637	Ankyrin repeats (many copies)
CPIJ002016			0.00745169	0.00831449	0.0597511	0.139152	1491	283.217	1207.78	26	9	16.3171	9.68285	conserved hypothetical protein	0	-
CPIJ003427			0.00744879	0.00815646	0.0495578	0.164585	1857	380.251	1476.75	30	11	18.3018	11.6982	transcription elongation factor b polypeptide 3	6	F:translation elongation factor activity; C:integral to membrane; P:regulation of transcription, DNA-dependent; P:translational elongation; F:DNA binding; C:nucleus	-	PF08711	TFIIS helical bundle-like domain
CPIJ018067			0.00744657	0.0074176	0.0451887	0.164147	339	70.4202	268.58	5	2	3.07493	1.92507	conserved hypothetical protein	2	F:zinc ion binding; C:nucleus	-	PF07776	Zinc-finger associated domain (zf-AD)
CPIJ007536			0.00744225	0.00792126	0.0317349	0.249607	834	296.528	537.472	13	4	8.95054	4.04946	hypothetical protein CpipJ_CPIJ007536	0	-
CPIJ012893			0.00744115	0.00919679	0.0929582	0.0989347	1545	335.506	1209.49	40	9	29.4842	10.5158	breast cancer type 2 susceptibility	4	P:regulation of S phase of mitotic cell cycle; P:double-strand break repair via homologous recombination; F:single-stranded DNA binding; C:nucleus	-	PF09103	BRCA2, oligonucleotide/oligosaccharide-binding, domain 1
CPIJ010888			0.00743894	0.00808986	0.0986889	0.0819733	1524	314.152	1209.85	39	9	29.6422	9.3578	origin recognition complex subunit 1	6	P:DNA replication; F:DNA binding; F:ATP binding; F:nucleoside-triphosphatase activity; C:origin recognition complex; C:nucleus	EC:3.6.1.15	PF09079	CDC6, C terminal
CPIJ005194			0.00743759	0.00819829	0.0444492	0.184442	1560	349.929	1210.07	25	9	15.2643	9.7357	laminin gamma-3 chain	0	-		PF02210	Laminin G domain
CPIJ800096			0.00743541	0.00893271	0.0363276	0.245893	372	103.017	268.983	6	2	3.65398	2.34602	kda basic salivary protein	0	-
CPIJ010207			0.00743439	0.00782006	0.0295671	0.264486	168	33.4895	134.51	2	1	0.969788	1.03021	conserved hypothetical protein	0	-
CPIJ018861			0.00743417	0.00890944	0.0814926	0.109328	519	115.458	403.542	13	3	9.40584	3.59416	ppargamma constitutive coactivator 1	0	-
CPIJ007923			0.0074336	0.00740899	0.217538	0.0340585	462	58.4267	403.573	15	3	12.1433	2.85674	conserved hypothetical protein	5	P:protein folding; F:nucleic acid binding; F:unfolded protein binding; F:nucleotide binding; F:heat shock protein binding	-	PF00226	DnaJ domain
CPIJ000403			0.00743119	0.0077294	0.0234973	0.328948	354	84.8637	269.136	4	2	1.95769	2.04231	mitochondrial dna polymerase accessory subunit	4	C:cytoplasm; P:glycyl-tRNA aminoacylation; F:ATP binding; F:glycine-tRNA ligase activity	EC:6.1.1.14
CPIJ019401			0.00742967	0.00672331	0.0599498	0.112149	324	54.8095	269.191	5	2	3.22413	1.77587	hypothetical protein CpipJ_CPIJ019401	1	F:zinc ion binding	-
CPIJ010464			0.00742539	0.00825894	0.114454	0.0721596	2778	623.226	2154.77	82	16	65.6269	16.3731	conserved hypothetical protein	4	F:RNA binding; P:RNA methylation; F:RNA methyltransferase activity; P:RNA processing	-	PF00588	SpoU rRNA Methylase family
CPIJ019189			0.00740404	0.00763286	0.115849	0.0658863	480	74.8157	405.184	11	3	8.10717	2.89283	zinc finger protein 58	3	C:nucleus; F:DNA binding; F:zinc ion binding	-	PF13465	Zinc-finger double domain
CPIJ002750			0.00739899	0.00801666	0.0373886	0.214414	354	83.6932	270.307	5	2	2.95421	2.04579	kda salivary protein	0	-
CPIJ014060			0.00739749	0.0067087	0.127015	0.0528181	339	68.6383	270.362	10	2	8.27782	1.72218	transcription factor	3	F:zinc ion binding; F:nucleic acid binding; C:intracellular	-	PF00096	Zinc finger, C2H2 type
CPIJ013580			0.00739344	0.00735855	0.0739854	0.0994594	1326	243.963	1082.04	25	8	17.3475	7.65247	conserved hypothetical protein	0	-		PF00856	SET domain
CPIJ000864			0.00738191	0.00745878	0.0775329	0.0962015	1749	258.871	1490.13	30	11	19.308	10.692	multicopper oxidase	3	F:oxidoreductase activity; P:oxidation-reduction process; F:copper ion binding	-	PF07731	Multicopper oxidase
CPIJ012164			0.00737779	0.00782862	0.141253	0.0554226	333	61.9158	271.084	10	2	8.04728	1.95272	conserved hypothetical protein	0	-		PF06585	Haemolymph juvenile hormone binding protein (JHBP)
CPIJ004429			0.00737704	0.0076709	0.0742478	0.103315	801	123.221	677.779	14	5	8.92695	5.07305	u5 snrnp-specific protein	2	F:metal ion binding; F:zinc ion binding	-	PF01753	MYND finger
CPIJ013879			0.00737532	0.00857404	0.135396	0.0633256	1917	425.542	1491.46	64	11	52.3755	11.6245	dna polymerase theta	5	F:DNA-directed DNA polymerase activity; P:DNA replication; F:ATP-dependent helicase activity; F:DNA binding; F:ATP binding	EC:2.7.7.7	PF00476	DNA polymerase family A
CPIJ800191			0.00737266	0.00797131	0.0748833	0.10645	1431	345.91	1085.09	33	8	24.7391	8.26094	cytochrome p450	6	F:heme binding; F:oxidoreductase activity, acting on paired donors, with incorporation or reduction of molecular oxygen; F:monooxygenase activity; F:iron ion binding; F:electron carrier activity; P:oxidation-reduction process	-	PF00067	Cytochrome P450
CPIJ006514			0.00736941	0.00867426	0.0373242	0.232403	159	23.3036	135.696	2	1	0.849879	1.15012	hypothetical protein CpipJ_CPIJ006514	0	-
CPIJ009256			0.00736282	0.00759869	0.0331425	0.229273	2301	671.186	1629.81	33	12	21.1982	11.8018	conserved hypothetical protein	0	-		PF00498	FHA domain
CPIJ802089			0.00735024	0.00773951	0.0915307	0.0845565	711	166.8	544.2	18	4	14.108	3.89202	conserved hypothetical protein	0	-
CPIJ003298			0.00734609	0.00753183	0.0327506	0.229975	1080	263.239	816.761	14	6	8.17016	5.82984	solute carrier family 23 member 2	6	C:membrane; F:nucleic acid binding; C:nucleus; F:zinc ion binding; P:transmembrane transport; F:transporter activity	-	PF05485	THAP domain
CPIJ003970			0.00734485	0.00736843	0.0107893	0.682938	738	193.401	544.599	6	4	2.05262	3.94738	conserved hypothetical protein	0	-
CPIJ018910			0.00734454	0.00781228	0.0241471	0.323529	783	238.378	544.622	10	4	5.74988	4.25012	conserved hypothetical protein	1	F:structural constituent of cuticle	-	PF00379	Insect cuticle protein
CPIJ009941			0.00734131	0.00743137	0.0897092	0.0828385	1554	328.064	1225.94	37	9	28.2538	8.74618	molybdenum cofactor sulfurase	5	F:pyridoxal phosphate binding; F:molybdenum ion binding; P:Mo-molybdopterin cofactor biosynthetic process; F:Mo-molybdopterin cofactor sulfurase activity; F:transferase activity	-	PF00266	Aminotransferase class-V
CPIJ019594		X	0.00733915	0.0130065	0.173047	0.0751618	1506	279.696	1226.3	58	9	43.6241	14.3759	chromosome transmission fidelity protein 18	2	F:nucleoside-triphosphatase activity; F:ATP binding	EC:3.6.1.15	PF00004	ATPase family associated with various cellular activities (AAA)
CPIJ004847			0.0073366	0.0082844	0.0560222	0.147877	933	251.485	681.515	19	5	13.5642	5.43576	alpha methylacyl-coa racemase	2	F:catalytic activity; P:metabolic process	-	PF02515	CoA-transferase family III
CPIJ006026			0.00733023	0.007771	0.0426199	0.182332	2523	613.095	1909.9	40	14	25.5102	14.4898	conserved hypothetical protein	0	-
CPIJ800264			0.00732581	0.0082222	0.0866333	0.094908	912	229.482	682.518	24	5	18.7168	5.28322	cytochrome p450 4c1	6	F:heme binding; F:oxidoreductase activity, acting on paired donors, with incorporation or reduction of molecular oxygen; F:monooxygenase activity; F:iron ion binding; F:electron carrier activity; P:oxidation-reduction process	-	PF00067	Cytochrome P450
CPIJ010192			0.0073244	0.00780381	0.088767	0.0879134	1494	265.228	1228.77	33	9	23.4493	9.55071	conserved hypothetical protein	2	F:metal ion binding; F:zinc ion binding	-	PF00917	MATH domain
CPIJ014415			0.0073201	0.00731777	0.0747075	0.0979524	900	216.949	683.051	20	5	15.2859	4.71413	arginine n-methyltransferase 7	3	C:cytoplasm; F:protein-arginine omega-N symmetric methyltransferase activity; P:peptidyl-arginine methylation, to symmetrical-dimethyl arginine	-	PF06325	Ribosomal protein L11 methyltransferase (PrmA)
CPIJ004307			0.0073175	0.00790084	0.0533854	0.147996	1395	301.733	1093.27	24	8	15.6226	8.37738	supercoiling factor	1	F:calcium ion binding	-	PF13499	EF-hand domain pair
CPIJ009302			0.00731673	0.00793665	0.151627	0.0523432	1659	292.272	1366.73	50	10	40.1681	9.83188	microcephalin	6	F:metal ion binding; F:hydrolase activity; P:protein dephosphorylation; F:catalytic activity; F:protein serine/threonine phosphatase activity; F:phosphoprotein phosphatase activity		PF12738	twin BRCT domain
CPIJ015012			0.00731237	0.00806739	0.0701204	0.115051	2286	508.194	1777.81	47	13	33.5121	13.4879	conserved hypothetical protein	0	-		PF00595	PDZ domain (Also known as DHR or GLGF)
CPIJ006325			0.00731138	0.00801037	0.0790033	0.101393	1029	208.362	820.638	22	6	15.7217	6.27828	choline ethanolamine kinase	3	F:kinase activity; P:phosphorylation; P:glycerophospholipid biosynthetic process	-	PF01633	Choline/ethanolamine kinase
CPIJ016453			0.00729361	0.00683032	0.090942	0.0751063	687	138.575	548.425	16	4	12.3339	3.66612	acyl-coa dehydrogenase	3	F:flavin adenine dinucleotide binding; F:acyl-CoA dehydrogenase activity; P:oxidation-reduction process	EC:1.3.99.3	PF02770	Acyl-CoA dehydrogenase, middle domain
CPIJ004552			0.00727904	0.00736794	0.101039	0.0729219	498	85.8583	412.142	11	3	8.14788	2.85212	camp-dependent protein kinase type ii regulatory subunit	4	P:regulation of protein phosphorylation; P:signal transduction; F:cAMP-dependent protein kinase regulator activity; C:cAMP-dependent protein kinase complex	-	PF00027	Cyclic nucleotide-binding domain
CPIJ010479			0.00727736	0.00964038	0.0247331	0.389776	378	103.175	274.825	5	2	2.4531	2.5469	fibrinogen and fibronectin	2	P:signal transduction; F:receptor binding	-	PF00147	Fibrinogen beta and gamma chains, C-terminal globular domain
CPIJ014223			0.00727338	0.00686334	0.12125	0.0566049	540	127.537	412.463	16	3	13.5242	2.4758	cellular retinaldehyde-binding protein	3	C:intracellular; P:transport; F:transporter activity	-	PF00650	CRAL/TRIO domain
CPIJ001185			0.00727199	0.0112559	0.000225118	50	309	33.9724	275.028	3	2	0.00739316	2.99261	hypothetical protein CpipJ_CPIJ001185	2	C:intracellular; P:intracellular protein transport	-
CPIJ802358			0.00726957	0.0101969	0.0331353	0.307736	564	151.321	412.679	9	3	4.8933	4.1067	conserved hypothetical protein	2	F:zinc ion binding; F:nucleic acid binding	-	PF05444	Protein of unknown function (DUF753)
CPIJ005775			0.00726892	0.00800715	0.0911322	0.0878631	3207	593.127	2613.87	73	19	52.6237	20.3763	polypeptide of 976 aa	0	-
CPIJ012704			0.00726673	0.00698055	0.0969274	0.0720184	738	187.546	550.454	20	4	16.5102	3.48985	pyrroline-5-carboxylate reductase	4	F:pyrroline-5-carboxylate reductase activity; P:L-proline biosynthetic process; P:oxidation-reduction process; F:nucleotide binding	EC:1.5.1.2	PF03807	NADP oxidoreductase coenzyme F420-dependent
CPIJ017146			0.00726116	0.00730638	0.145532	0.0502047	345	69.5621	275.438	11	2	9.17592	1.82408	diacylglycerol o-acyltransferase	1	F:transferase activity, transferring acyl groups other than amino-acyl groups	EC:2.3.1.0	PF03982	Diacylglycerol acyltransferase
CPIJ006207			0.00725781	0.00766942	0.0831777	0.0922053	1044	217.304	826.696	24	6	17.7675	6.23247	cdk5 regulatory subunit-associated protein 1	4	C:cytoplasm; P:tRNA modification; F:transferase activity; F:4 iron, 4 sulfur cluster binding	-	PF04055	Radical SAM superfamily
CPIJ009457			0.00725403	0.00721413	0.109041	0.06616	1548	307.315	1240.69	40	9	31.5681	8.43186	conserved hypothetical protein	0	-
CPIJ017186			0.00725082	0.0102153	0.103132	0.0990511	669	117.338	551.662	17	4	11.5987	5.40135	dna (cytosine-5)-methyltransferase	3	F:DNA (cytosine-5-)-methyltransferase activity; F:DNA binding; P:C-5 methylation of cytosine	EC:2.1.1.37	PF00145	C-5 cytosine-specific DNA methylase
CPIJ002025		X	0.00724598	0.0118274	0.131405	0.0900071	1971	314.915	1656.09	58	12	39.3665	18.6335	conserved hypothetical protein	4	F:metal ion binding; P:GTP catabolic process; F:GTPase activity; F:GTP binding	-	PF02263	Guanylate-binding protein, N-terminal domain
CPIJ001029			0.00724351	0.00750258	0.0275245	0.272578	489	74.836	414.164	5	3	1.9932	3.0068	serendipity locus protein delta	3	F:zinc ion binding; F:nucleic acid binding; C:intracellular	-	PF13465	Zinc-finger double domain
CPIJ013474			0.00723163	0.00808008	0.0150323	0.537515	531	116.156	414.844	5	3	1.7125	3.2875	conserved hypothetical protein	3	C:intracellular; P:transport; F:transporter activity	-	PF00650	CRAL/TRIO domain
CPIJ018027			0.00722643	0.00778458	0.112564	0.0691568	900	208.095	691.905	27	5	21.9523	5.04774	trypsin 5	2	F:serine-type endopeptidase activity; P:proteolysis	EC:3.4.21.0	PF00089	Trypsin
CPIJ007966			0.00722584	0.00720816	0.0151618	0.475417	1305	336.254	968.746	12	7	5.06398	6.93602	conserved hypothetical protein	1	F:actin binding	-	PF02205	WH2 motif
CPIJ016406			0.00722056	0.00722274	0.0744923	0.0969595	681	127.026	553.974	13	4	9.13659	3.86341	l-isoaspartate(d-aspartate) o-methyltransferase	4	C:cytoplasm; P:methylation; P:cellular protein modification process; F:protein-L-isoaspartate (D-aspartate) O-methyltransferase activity	EC:2.1.1.77	PF01135	Protein-L-isoaspartate(D-aspartate) O-methyltransferase (PCMT)
CPIJ007310			0.00721258	0.00765881	0.0504734	0.151739	1719	471.178	1247.82	32	9	22.8269	9.17306	conserved hypothetical protein	0	-
CPIJ013724			0.00720435	0.00792537	0.091342	0.0867659	510	93.5854	416.415	11	3	7.9361	3.0639	dimethylaniline monooxygenase	4	F:flavin adenine dinucleotide binding; F:N,N-dimethylaniline monooxygenase activity; P:oxidation-reduction process; F:NADP binding	EC:1.14.13.8	PF00743	Flavin-binding monooxygenase-like
CPIJ801546			0.00720206	0.00746164	0.0697273	0.107012	882	187.754	694.246	17	5	12.1803	4.81966	peritrophic membrane chitin binding protein	2	F:hydrolase activity, acting on carbon-nitrogen (but not peptide) bonds; P:carbohydrate metabolic process	-	PF01522	Polysaccharide deacetylase
CPIJ006512			0.0071935	0.00807497	0.0392969	0.205486	663	245.957	417.043	13	3	9.6409	3.3591	hypothetical protein CpipJ_CPIJ006512	0	-
CPIJ016005			0.00717878	0.00753781	0.0561662	0.134206	720	162.802	557.198	13	4	8.90822	4.09178	acid phosphatase-1	1	F:acid phosphatase activity	EC:3.1.3.2	PF00328	Histidine phosphatase superfamily (branch 2)
CPIJ012351			0.00717835	0.00751637	0.100982	0.0744326	873	176.461	696.539	22	5	17.0041	4.9959	cg4813 cg4813-pa	2	F:zinc ion binding; F:metal ion binding	-	PF13923	Zinc finger, C3HC4 type (RING finger)
CPIJ017156			0.00717795	0.00785403	0.00931115	0.843508	750	192.738	557.262	6	4	1.74478	4.25522	ankyrin repeat and socs box protein 13	0	-		PF13637	Ankyrin repeats (many copies)
CPIJ801429			0.00717522	0.00740171	0.109369	0.0676766	825	128.157	696.843	18	5	13.158	4.84196	zinc finger protein 729	3	F:nucleic acid binding; C:nucleus; F:zinc ion binding	-	PF07776	Zinc-finger associated domain (zf-AD)
CPIJ010766			0.0071675	0.00707544	0.114909	0.0615742	834	136.407	697.593	18	5	13.6893	4.31069	conserved hypothetical protein	3	F:zinc ion binding; F:nucleic acid binding; C:intracellular	-	PF13465	Zinc-finger double domain
CPIJ012839			0.00716663	0.00757089	0.0553328	0.136825	1038	200.786	837.214	17	6	10.8245	6.17553	1-acylglycerol-3-phosphate acyltransferase	2	P:metabolic process; F:transferase activity, transferring acyl groups	-	PF01553	Acyltransferase
CPIJ014817			0.00716545	0.00703096	0.138705	0.0506899	972	134.648	837.352	22	6	16.7271	5.2729	juvenile hormone-inducible protein	1	F:transferase activity, transferring phosphorus-containing groups	-	PF02958	Ecdysteroid kinase
CPIJ005738			0.00716026	0.00769346	0.0699684	0.109956	504	85.0206	418.979	9	3	5.8371	3.1629	kda salivary protein	0	-
CPIJ008480			0.0071554	0.00699435	0.238283	0.029353	324	44.4913	279.509	11	2	9.28736	1.71264	mitotic spindle checkpoint component mad2	0	-		PF02301	HORMA domain
CPIJ011282			0.00715298	0.00707408	0.175632	0.0402779	852	152.991	699.009	29	5	24.4927	4.50734	islet cell autoantigen 1	1	F:protein domain specific binding	-	PF06456	Arfaptin-like domain
CPIJ000033			0.00715011	0.00790125	0.0249711	0.316416	1152	312.852	839.148	14	6	7.57286	6.42714	udp-glucuronosyltransferase 2b15	2	F:transferase activity, transferring hexosyl groups; P:metabolic process	EC:2.4.1.0	PF00201	UDP-glucoronosyl and UDP-glucosyl transferase
CPIJ802477			0.00714565	0.00739833	0.138755	0.0533192	903	203.274	699.726	30	5	25.3477	4.65231	leucine rich protein	0	-		PF13855	Leucine rich repeat
CPIJ018836			0.00714456	0.00712007	0.110693	0.0643224	1659	399.296	1259.7	48	9	39.9027	8.09727	conserved hypothetical protein	0	-		PF00041	Fibronectin type III domain
CPIJ003801			0.00713839	0.00759296	0.110853	0.0684955	1035	194.474	840.526	26	6	20.0611	5.9389	nadp-dependent leukotriene b4 12-hydroxydehydrogenase	4	F:zinc ion binding; F:oxidoreductase activity; P:oxidation-reduction process; F:nucleotide binding	-	PF00107	Zinc-binding dehydrogenase
CPIJ802093			0.0071268	0.00828964	0.0744144	0.111398	708	146.738	561.262	15	4	10.5183	4.48173	conserved hypothetical protein	0	-
CPIJ007909			0.00711243	0.00731752	0.102902	0.0711117	735	172.604	562.396	20	4	16.2377	3.76232	conserved hypothetical protein	3	C:extracellular region; F:chitin binding; P:chitin metabolic process	-	PF01607	Chitin binding Peritrophin-A domain
CPIJ002937			0.00711192	0.0112123	0.122539	0.0914998	744	181.564	562.436	27	4	21.0372	5.9628	trypsin delta gamma	4	F:metallopeptidase activity; P:proteolysis; F:serine-type endopeptidase activity; F:cation binding	EC:3.4.21.0	PF00089	Trypsin
CPIJ011918			0.00711126	0.00654506	0.0945865	0.0691966	213	72.3781	140.622	7	1	6.17044	0.829559	defensin 4	4	C:extracellular region; P:defense response; F:ion channel inhibitor activity; P:pathogenesis	-
CPIJ006490			0.00710306	0.00706774	0.00015026	47.0367	540	117.647	422.353	3	3	0.0176615	2.98234	anopheles gambiae pest agap012638-pa	1	F:zinc ion binding	-	PF00856	SET domain
CPIJ005093			0.00709639	0.00715677	0.0663923	0.107795	1107	261.5	845.5	22	6	16.3141	5.68594	26s protease regulatory subunit 6a	2	F:peptidase activity; P:proteolysis	-
CPIJ002741			0.00709617	0.00725833	0.0285269	0.254438	357	75.1578	281.842	4	2	2.04693	1.95307	niemann-pick type c-	0	-		PF02221	ML domain
CPIJ800092			0.00708873	0.0102296	0.0773047	0.132328	585	161.793	423.207	16	3	11.8859	4.11411	alpha-amylase i	4	P:carbohydrate metabolic process; C:extracellular region; F:metal ion binding; F:alpha-amylase activity	EC:3.2.1.1	PF02806	Alpha amylase, C-terminal all-beta domain
CPIJ002011			0.0070883	0.00749487	0.121865	0.0615014	5523	1008.52	4514.48	147	32	115.267	31.7332	female sterile nasrat	0	-
CPIJ001315			0.00708139	0.00753031	0.0824757	0.0913034	744	179.139	564.861	18	4	13.9763	4.02374	k10 protein	0	-
CPIJ802440			0.00707945	0.00773661	0.0320857	0.241123	171	29.7457	141.254	2	1	0.932388	1.06761	cuticle protein	1	F:structural constituent of cuticle	-	PF00379	Insect cuticle protein
CPIJ013678			0.00707649	0.00855533	0.142845	0.0598925	366	83.3736	282.626	13	2	10.8061	2.19394	conserved hypothetical protein	0	-
CPIJ003984			0.00707589	0.00691971	0.0578898	0.119533	774	208.7	565.3	15	4	11.3312	3.66876	conserved hypothetical protein	2	F:zinc ion binding; C:intracellular	-
CPIJ010834			0.00706527	0.00593314	0.203777	0.0291159	498	73.3879	424.612	16	3	13.6932	2.30677	conserved hypothetical protein	0	-
CPIJ005712			0.00705789	0.0069848	0.0250665	0.278651	693	126.258	566.742	7	4	3.11	3.89	jnk stimulatory phosphatase	2	F:protein tyrosine/serine/threonine phosphatase activity; P:protein dephosphorylation	-	PF00782	Dual specificity phosphatase, catalytic domain
CPIJ007483			0.00705045	0.00744347	0.0174263	0.427139	7989	2457.44	5531.56	83	39	42.3153	40.6847	conserved hypothetical protein	0	-
CPIJ012474			0.00704877	0.00842339	0.0811687	0.103776	1251	257.919	993.081	28	7	20.006	7.99396	microtubule binding protein	8	F:metal ion binding; P:proteolysis; F:metallopeptidase activity; F:calcium ion binding; F:hydrolase activity; F:zinc ion binding; F:peptidase activity; F:metalloendopeptidase activity
CPIJ014783			0.00704684	0.0067955	0.121886	0.0557531	1185	191.647	993.353	28	7	21.7226	6.27742	isovaleryl- mitochondrial	3	F:flavin adenine dinucleotide binding; F:acyl-CoA dehydrogenase activity; P:oxidation-reduction process	EC:1.3.99.3	PF02771	Acyl-CoA dehydrogenase, N-terminal domain
CPIJ019922			0.00704633	0.00889982	0.0152701	0.582829	699	131.329	567.671	7	4	1.98905	5.01095	conserved hypothetical protein	0	-
CPIJ802133			0.00704323	0.00722485	0.0399709	0.180753	558	132.059	425.941	8	3	5.05371	2.94629	conserved hypothetical protein	0	-		PF11781	RNA polymerase I-specific transcription initiation factor Rrn7
CPIJ002327			0.00704301	0.00991142	0.110287	0.0898698	4215	949.346	3265.65	129	23	98.5378	30.4622	aael014312- partial	1	F:calcium ion binding	-	PF00008	EGF-like domain
CPIJ016731			0.0070396	0.00678682	0.0671835	0.101019	348	63.8928	284.107	6	2	4.14023	1.85977	conserved hypothetical protein	0	-		PF01661	Macro domain
CPIJ006565			0.00703797	0.0104234	0.0897666	0.116117	564	137.741	426.259	16	3	11.7704	4.22959	conserved hypothetical protein	0	-
CPIJ001288			0.00703602	0.0071883	0.0639906	0.112334	3045	628.86	2416.14	57	17	39.8157	17.1843	cg9004 cg9004-pa	3	P:RNA metabolic process; F:RNA binding; F:DNA binding	-	PF02847	MA3 domain
CPIJ801994			0.00702507	0.00715895	0.109002	0.0656776	516	88.9577	427.042	12	3	9.12349	2.87651	conserved hypothetical protein	3	F:zinc ion binding; C:intracellular; F:DNA binding	-
CPIJ017113			0.00702206	0.00741439	0.112011	0.0661933	1269	272.142	996.858	36	7	28.9746	7.02537	conserved hypothetical protein	1	P:vesicle-mediated transport	-
CPIJ005810			0.00702123	0.00685842	0.0554081	0.12378	1119	264.449	854.551	19	6	13.5716	5.42845	zinc finger protein 850-like	2	F:zinc ion binding; C:nucleus	-	PF07776	Zinc-finger associated domain (zf-AD)
CPIJ018791			0.00702099	0.00695529	0.0608715	0.114262	2028	461.266	1566.73	38	11	27.3755	10.6245	aael004824- partial	1	F:transferase activity, transferring acyl groups other than amino-acyl groups	EC:2.3.1.0
CPIJ019586			0.00701932	0.00715248	0.00014305	50	201	58.5359	142.464	1	1	0.00815066	0.991849	cytochrome p450 6d3	6	F:heme binding; F:oxidoreductase activity, acting on paired donors, with incorporation or reduction of molecular oxygen; F:monooxygenase activity; F:iron ion binding; F:electron carrier activity; P:oxidation-reduction process	-	PF00067	Cytochrome P450
CPIJ013399			0.00701875	0.00714708	0.0362567	0.197124	735	165.098	569.902	10	4	5.95077	4.04923	diphthamide biosynthesis protein 2	2	P:peptidyl-diphthamide biosynthetic process from peptidyl-histidine; C:cytoplasm	-	PF01866	Putative diphthamide synthesis protein
CPIJ018683			0.00701196	0.00732624	0.0941528	0.0778122	672	101.546	570.454	13	4	9.04583	3.95417	karl	0	-
CPIJ013856			0.00700884	0.00764236	0.0428981	0.178152	192	49.3227	142.677	3	1	1.97975	1.02025	predicted protein	4	F:heme binding; F:peroxidase activity; P:oxidation-reduction process; P:response to oxidative stress	EC:1.11.1.7
CPIJ007842			0.00700229	0.0113256	0.00917315	1.23464	375	89.3791	285.621	4	2	0.808826	3.19117	isoleucyl trna synthetase	1	F:catalytic activity	-
CPIJ801485			0.00700021	0.00784083	0.057527	0.136298	2589	589.059	1999.94	48	14	32.8148	15.1852	protease m1 zinc metalloprotease	3	F:metalloendopeptidase activity; P:proteolysis; F:zinc ion binding	EC:3.4.24.0	PF01433	Peptidase family M1
CPIJ011050			0.00699798	0.00893365	0.122903	0.0726886	879	164.508	714.492	25	5	19.0013	5.99872	zinc finger protein 263	3	F:nucleic acid binding; C:nucleus; F:zinc ion binding	-	PF13894	C2H2-type zinc finger
CPIJ004096			0.00699593	0.0063002	0.156224	0.040328	498	69.179	428.821	12	3	9.60014	2.39986	acyl- delta-9 desaturase	4	P:fatty acid biosynthetic process; F:oxidoreductase activity, acting on paired donors, with oxidation of a pair of donors resulting in the reduction of molecular oxygen to two molecules of water; C:integral to membrane; P:oxidation-reduction process	EC:1.14.19.0	PF00487	Fatty acid desaturase
CPIJ011864			0.00699582	0.0073147	0.0464384	0.157514	1134	276.345	857.655	18	6	12.0898	5.91017	zinc finger protein	3	F:zinc ion binding; F:nucleic acid binding; C:intracellular	-	PF13465	Zinc-finger double domain
CPIJ017438			0.00699225	0.00773105	0.0682554	0.113267	2031	457.835	1573.17	41	11	29.5135	11.4865	ankyrin isoform o	0	-
CPIJ003751			0.00698812	0.00676306	0.112197	0.0602786	1896	321.895	1574.1	44	11	33.9829	10.0171	conserved hypothetical protein	0	-		PF09779	Uncharacterized conserved protein (DUF2349)
CPIJ009622			0.0069879	0.00705572	0.0724877	0.0973367	1677	389.056	1287.94	36	9	27.2268	8.7732	conserved hypothetical protein	0	-
CPIJ001513			0.00697993	0.00847407	0.0318478	0.26608	717	143.928	573.072	9	4	4.37013	4.62987	zinc finger protein	3	F:nucleic acid binding; C:nucleus; F:zinc ion binding	-	PF07776	Zinc-finger associated domain (zf-AD)
CPIJ004788			0.00697922	0.0070954	0.0881025	0.0805358	357	70.4349	286.565	8	2	6.02563	1.97437	predicted protein	0	-
CPIJ006526			0.00697773	0.00689809	0.0460983	0.149639	189	45.6868	143.313	3	1	2.04166	0.958344	hypothetical protein CpipJ_CPIJ006526	0	-
CPIJ003187			0.00696849	0.00791257	0.0501295	0.157843	3510	783.439	2726.56	59	19	38.0809	20.9191	serine threonine-protein kinase smg1-like	1	F:phosphotransferase activity, alcohol group as acceptor	EC:2.7.1.0	PF02260	FATC domain
CPIJ011719			0.00696836	0.00747666	0.0845211	0.0884592	1236	231.465	1004.54	26	7	18.7874	7.21258	serine protease serpin	3	F:serine-type endopeptidase inhibitor activity; P:proteolysis; F:peptidase activity	-	PF00079	Serpin (serine protease inhibitor)
CPIJ012035			0.00696603	0.00735563	0.05171	0.142248	1440	291.569	1148.43	23	8	14.7409	8.25911	conserved hypothetical protein	2	P:proteolysis; F:serine-type endopeptidase activity	EC:3.4.21.0	PF12032	Regulatory CLIP domain of proteinases
CPIJ001160			0.00695509	0.00737365	0.135112	0.0545744	351	63.4413	287.559	10	2	8.01688	1.98312	abc transporter	3	F:nucleoside-triphosphatase activity; F:nucleotide binding; C:membrane	EC:3.6.1.15
CPIJ014748			0.00695478	0.00681019	0.0394254	0.172736	342	54.4282	287.572	4	2	2.09134	1.90866	conserved hypothetical protein	0	-		PF01417	ENTH domain
CPIJ007274			0.00695314	0.00834004	0.07722	0.108004	558	126.54	431.46	13	3	9.50114	3.49886	pyruvate dehydrogenase e1 beta subunit	0	-		PF08213	Mitochondrial domain of unknown function (DUF1713)
CPIJ019138			0.00695158	0.00689721	0.106694	0.0646449	723	147.591	575.409	18	4	14.3767	3.62333	fumarylacetoacetate hydrolase domain-containing protein 1	2	P:metabolic process; F:hydrolase activity	-	PF01557	Fumarylacetoacetate (FAA) hydrolase family
CPIJ017877			0.00694664	0.00682265	0.0830593	0.0821419	411	123.091	287.909	11	2	9.22719	1.77281	fibrinogen and fibronectin	2	P:signal transduction; F:receptor binding	-	PF00147	Fibrinogen beta and gamma chains, C-terminal globular domain
CPIJ020061			0.00694319	0.00711627	0.0280532	0.25367	222	77.9742	144.026	3	1	2.04283	0.957173	hypothetical protein CpipJ_CPIJ020061	0	-
CPIJ017147			0.00693502	0.00722491	0.269496	0.026809	1143	133.632	1009.37	38	7	31.6009	6.39912	kynurenine 3-monooxygenase	5	P:oxidation-reduction process; C:integral to membrane; P:NAD biosynthetic process; C:mitochondrial outer membrane; F:kynurenine 3-monooxygenase activity	EC:1.14.13.9	PF01494	FAD binding domain
CPIJ008180			0.00693351	0.00766967	0.0681326	0.11257	534	101.319	432.681	10	3	6.75343	3.24657	u184_aedae ame: full=upf0184 protein aael002161	0	-		PF08584	Ribonuclease P 40kDa (Rpp40) subunit
CPIJ014326			0.00693318	0.00751247	0.0511294	0.14693	555	122.298	432.702	9	3	5.92162	3.07838	conserved hypothetical protein	3	C:integral to membrane; C:plasma membrane; P:carbohydrate transport	-	PF03083	Sugar efflux transporter for intercellular exchange
CPIJ006279			0.006933	0.00734193	0.0572815	0.128173	933	211.812	721.188	17	5	11.8351	5.16493	formyl-coenzyme a transferase	2	P:metabolic process; F:transferase activity	-	PF02515	CoA-transferase family III
CPIJ009900		X	0.00692809	0.0171784	0.0479815	0.358021	201	56.6597	144.34	5	1	2.61499	2.38501	conserved hypothetical protein	1	P:signal transduction	-	PF00531	Death domain
CPIJ004985			0.00692502	0.00774014	0.0507868	0.152405	546	112.788	433.212	9	3	5.67688	3.32312	ga binding protein beta chain	0	-
CPIJ001379			0.00692353	0.00703483	0.0536861	0.131036	207	62.5651	144.435	4	1	3.07101	0.928993	adipokinetic hormone 2 preprohormone	2	C:extracellular region; F:hormone activity	-
CPIJ001249			0.0069166	0.0070671	0.0425308	0.166164	579	145.261	433.739	9	3	6.01542	2.98458	potentail helicase mov-10	3	F:ATP binding; F:helicase activity; F:DNA binding	-	PF13087	AAA domain
CPIJ007369			0.00691356	0.00709181	0.0677275	0.104711	732	153.427	578.573	14	4	10.0368	3.96318	transmembrane protein 179	1	C:integral to membrane
CPIJ017928			0.00691341	0.00782896	0.0703664	0.11126	348	58.7068	289.293	6	2	3.87531	2.12469	tyrosine-protein kinase pr2	2	F:kinase activity; P:phosphorylation	-
CPIJ801650			0.00691163	0.00739303	0.0430843	0.171595	573	138.949	434.051	9	3	5.85927	3.14073	hypothetical protein AND_10751	0	-
CPIJ018255			0.0069082	0.0100847	0.221793	0.0454689	330	40.4889	289.511	11	2	8.30114	2.69886	mitochondrial 28s ribosomal protein s33	1	C:ribosome	-	PF08293	Mitochondrial ribosomal subunit S27
CPIJ014224			0.00690554	0.00931649	0.0875865	0.106369	558	123.566	434.434	14	3	10.1894	3.81055	cellular retinaldehyde-binding protein	3	C:intracellular; P:transport; F:transporter activity	-	PF00650	CRAL/TRIO domain
CPIJ019020			0.0069038	0.00712201	0.127592	0.0558187	1626	322.374	1303.63	48	9	39.1606	8.83938	creatine transporter	3	C:integral to membrane; F:neurotransmitter:sodium symporter activity; P:neurotransmitter transport	-	PF00209	Sodium:neurotransmitter symporter family
CPIJ007356			0.00689582	0.00929695	0.108585	0.085619	921	195.923	725.077	26	5	19.7439	6.25609	conserved hypothetical protein	0	-		PF00086	Thyroglobulin type-1 repeat
CPIJ007938			0.00689549	0.00726281	0.114928	0.0631942	1674	368.802	1305.2	49	9	40.0443	8.95574	asparagine synthetase	3	P:L-asparagine biosynthetic process; F:asparagine synthase (glutamine-hydrolyzing) activity; F:ATP binding	EC:6.3.5.4	PF00733	Asparagine synthase
CPIJ019855			0.00688684	0.00694167	0.0470176	0.14764	357	66.5913	290.409	5	2	3.04161	1.95839	conserved hypothetical protein	3	C:membrane; F:ATP binding; P:protein import	-	PF07517	SecA DEAD-like domain
CPIJ001511			0.00688553	0.0100392	0.0738515	0.135938	201	55.7677	145.232	5	1	3.69272	1.30728	zinc finger protein 630	3	F:nucleic acid binding; C:intracellular; F:zinc ion binding	-	PF13465	Zinc-finger double domain
CPIJ009797			0.00688426	0.0103548	0.033363	0.310367	384	93.4823	290.518	6	2	3.05415	2.94585	hepatic triacylglycerol lipase	3	C:extracellular region; F:hydrolase activity; P:lipid metabolic process	-	PF00151	Lipase
CPIJ003704			0.00688173	0.00701078	0.0527601	0.13288	1110	238.126	871.874	18	6	12.1088	5.89124	conserved hypothetical protein	0	-
CPIJ006673			0.00687507	0.007318	0.0678895	0.107793	921	193.735	727.265	18	5	12.8146	5.18538	conserved hypothetical protein	5	F:DNA binding; C:nucleus; F:zinc ion binding; P:DNA integration; P:DNA recombination	-	PF07776	Zinc-finger associated domain (zf-AD)
CPIJ007854			0.00687287	0.00910808	0.133232	0.0683624	885	157.502	727.498	26	5	19.7604	6.23961	zinc finger protein 33a	3	F:nucleic acid binding; C:nucleus; F:zinc ion binding	-	PF13465	Zinc-finger double domain
CPIJ006013			0.00687232	0.00702278	0.0416212	0.168731	729	146.955	582.045	10	4	5.99416	4.00584	serine protease	2	F:serine-type endopeptidase activity; P:proteolysis	EC:3.4.21.0	PF00089	Trypsin
CPIJ005467			0.00686964	0.00897946	0.0568845	0.157854	744	161.728	582.272	14	4	8.92672	5.07328	serine collagenase 1	2	P:proteolysis; F:serine-type endopeptidase activity	EC:3.4.21.0	PF00089	Trypsin
CPIJ008402			0.00686714	0.00650337	0.0567054	0.114687	183	37.3788	145.621	3	1	2.07354	0.926458	mitochondrial ribosomal l33	4	C:ribosome; F:structural constituent of ribosome; P:translation; C:mitochondrion	-
CPIJ014238			0.00686712	0.00709801	0.0691303	0.102676	720	137.514	582.486	13	4	9.05975	3.94025	conserved hypothetical protein	0	-		PF06585	Haemolymph juvenile hormone binding protein (JHBP)
CPIJ802031			0.0068656	0.00804142	0.0777955	0.103366	1533	367.775	1165.23	36	8	27.1187	8.88127	conserved hypothetical protein	3	F:nucleic acid binding; C:nucleus; F:zinc ion binding	-	PF00096	Zinc finger, C2H2 type
CPIJ005305			0.00685706	0.00732178	0.103826	0.0705199	4074	865.627	3208.37	110	22	87.2063	22.7937	aael013697- partial	0	-
CPIJ015698			0.00685333	0.00865439	0.0770151	0.112373	1608	294.774	1313.23	32	9	21.3245	10.6755	conserved hypothetical protein	0	-
CPIJ000822			0.00685326	0.00726173	0.112211	0.0647147	726	142.336	583.664	19	4	15.0154	3.98463	conserved hypothetical protein	0	-
CPIJ009138			0.00685151	0.00711814	0.0469752	0.15153	759	175.187	583.813	12	4	7.97356	4.02644	sphingosine-1-phosphate phosphohydrolase	3	C:membrane; P:metabolic process; F:hydrolase activity	-	PF01569	PAP2 superfamily
CPIJ000919			0.00684604	0.00739191	0.0234738	0.3149	1077	200.581	876.419	11	6	4.62977	6.37023	conserved hypothetical protein	3	F:beta-1,4-mannosylglycoprotein 4-beta-N-acetylglucosaminyltransferase activity; C:membrane; P:protein N-linked glycosylation	EC:2.4.1.144	PF04724	Glycosyltransferase family 17
CPIJ017385			0.00684117	0.00819304	0.115277	0.0710724	1443	273.61	1169.39	39	8	29.9135	9.08647	twinkle mitochondrial-like	6	P:DNA duplex unwinding; F:5'-3' DNA helicase activity; C:mitochondrial nucleoid; P:mitochondrial DNA replication; F:ATP binding; F:single-stranded DNA binding	-	PF13481	AAA domain
CPIJ016239			0.00683438	0.006795	0.0001359	50	219	72.6812	146.319	1	1	0.00983691	0.990163	poly a polymerase	5	P:RNA polyadenylation; P:transcription, DNA-dependent; F:RNA binding; F:polynucleotide adenylyltransferase activity; C:nucleus	EC:2.7.7.19	PF04928	Poly(A) polymerase central domain
CPIJ003668			0.00682996	0.00798768	0.0557344	0.143317	1131	252.518	878.482	20	6	13.3459	6.65406	zinc finger protein	3	F:nucleic acid binding; C:nucleus; F:zinc ion binding	-	PF07776	Zinc-finger associated domain (zf-AD)
CPIJ013823			0.0068286	0.00721753	0.116125	0.0621531	579	139.671	439.329	17	3	14.22	2.78001	mitochondrial import inner membrane translocase subunit tim22	1	C:integral to membrane	-	PF02466	Tim17/Tim22/Tim23/Pmp24 family
CPIJ013832			0.00682759	0.00839951	0.0715293	0.117427	363	70.0713	292.929	7	2	4.69516	2.30484	cytochrome b5	2	F:heme binding; F:metal ion binding	-	PF00173	Cytochrome b5-like Heme/Steroid binding domain
CPIJ003941			0.00682142	0.00710829	0.110337	0.0644234	564	124.209	439.791	16	3	13.0282	2.9718	queuine trna-ribosyltransferase	3	F:queuine tRNA-ribosyltransferase activity; F:metal ion binding; P:queuosine biosynthetic process	EC:2.4.2.29	PF01702	Queuine tRNA-ribosyltransferase
CPIJ020225			0.00681457	0.00720776	0.0717013	0.100525	369	75.5115	293.489	7	2	5.03341	1.96659	conserved hypothetical protein	0	-
CPIJ801548			0.0068112	0.00673425	0.12023	0.0560114	732	144.732	587.268	20	4	16.2963	3.7037	SEC14	3	C:intracellular; P:transport; F:transporter activity	-	PF00650	CRAL/TRIO domain
CPIJ013171			0.00680346	0.00759217	0.0785564	0.0966461	1812	342.156	1469.84	36	10	25.4385	10.5615	maltase 1	3	F:alpha-amylase activity; P:carbohydrate metabolic process; F:cation binding	EC:3.2.1.1	PF00128	Alpha amylase, catalytic domain
CPIJ013500			0.00679983	0.00753441	0.08012	0.094039	942	206.688	735.312	21	5	15.7356	5.2644	conserved hypothetical protein	1	F:DNA binding	-	PF00651	BTB/POZ domain
CPIJ013303			0.00679773	0.00592864	0.107218	0.055295	906	170.46	735.54	21	5	16.9546	4.04537	conserved hypothetical protein	0	-		PF12937	F-box-like
CPIJ015429			0.00679048	0.00799507	0.115037	0.0695	1464	285.882	1178.12	39	8	30.317	8.68304	cytochrome p450 3a19	6	F:heme binding; F:oxidoreductase activity, acting on paired donors, with incorporation or reduction of molecular oxygen; F:monooxygenase activity; F:iron ion binding; F:electron carrier activity; P:oxidation-reduction process	-	PF00067	Cytochrome P450
CPIJ005558			0.00678881	0.00738175	0.0677835	0.108902	1146	262.193	883.807	23	6	16.8241	6.17592	juvenile hormone-inducible	1	F:transferase activity, transferring phosphorus-containing groups	-	PF02958	Ecdysteroid kinase
CPIJ010295			0.00678132	0.0068206	0.0403546	0.169017	741	151.144	589.856	10	4	6.02552	3.97448	coagulation factor vii	2	F:serine-type endopeptidase activity; P:proteolysis	EC:3.4.21.0	PF12032	Regulatory CLIP domain of proteinases
CPIJ018356			0.00678104	0.00695558	0.0488444	0.142403	1851	376.3	1474.7	28	10	17.971	10.029	aael011250- partial	1	P:cell-cell signaling	-	PF03359	Guanylate-kinase-associated protein (GKAP) protein
CPIJ000050			0.00678104	0.00759443	0.0521715	0.145567	543	100.59	442.41	8	3	4.87737	3.12263	carboxylesterase	2	F:hydrolase activity; P:metabolic process		PF00135	Carboxylesterase family
CPIJ002161			0.00677583	0.00756601	0.0810115	0.0933942	2274	502.999	1771	52	12	39.1322	12.8678	lysozyme c-6	0	-		PF00062	C-type lysozyme/alpha-lactalbumin family
CPIJ009987			0.00677518	0.00703038	0.0807297	0.0870854	963	225.012	737.988	22	5	17.1124	4.88763	conserved hypothetical protein	0	-		PF09995	Uncharacterized protein conserved in bacteria (DUF2236)
CPIJ002595			0.00677487	0.00650639	0.161931	0.0401799	1257	223.774	1033.23	40	7	33.7404	6.25959	zinc carboxypeptidase	3	P:proteolysis; F:metallocarboxypeptidase activity; F:zinc ion binding	EC:3.4.17.0	PF00246	Zinc carboxypeptidase
CPIJ019944			0.00677048	0.00679209	0.000135842	50	216	68.3001	147.7	1	1	0.00916375	0.990836	hypothetical protein CpipJ_CPIJ019944	0	-
CPIJ000815			0.00676422	0.00712723	0.0538482	0.132358	1098	210.98	887.02	17	6	10.9221	6.07786	conserved hypothetical protein	2	F:zinc ion binding; F:metal ion binding	-	PF13414	TPR repeat
CPIJ002300			0.0067637	0.00721578	0.028733	0.251133	435	139.304	295.696	6	2	3.91371	2.08629	hypothetical protein CpipJ_CPIJ002300	0	-
CPIJ801573			0.00676233	0.00851415	0.0910073	0.0935547	381	85.2437	295.756	10	2	7.5495	2.4505	try1_anoga ame: full=trypsin-1 ame: full=antryp1 flags: precursor	2	P:proteolysis; F:serine-type endopeptidase activity	EC:3.4.21.0	PF00089	Trypsin
CPIJ002057			0.00675922	0.00774717	0.00787713	0.983501	390	94.1082	295.892	3	2	0.733086	2.26691	conserved hypothetical protein	0	-		PF13855	Leucine rich repeat
CPIJ003394			0.00675865	0.00764688	0.0572145	0.133653	951	211.207	739.793	17	5	11.5792	5.42077	aldose reductase	2	P:oxidation-reduction process; F:oxidoreductase activity	-	PF00248	Aldo/keto reductase family
CPIJ018793			0.00675267	0.0068179	0.107169	0.0636184	384	87.8206	296.179	11	2	9.05681	1.94319	kda salivary protein	0	-
CPIJ000243			0.00674634	0.00715305	0.0251948	0.28391	1203	313.629	889.371	14	6	7.75582	6.24418	otefin	1	C:integral to nuclear inner membrane	-
CPIJ012811			0.00674478	0.00684018	0.0477856	0.143143	1023	281.686	741.314	17	5	12.3483	4.65173	zinc finger protein	3	F:zinc ion binding; F:nucleic acid binding; C:intracellular	-	PF00096	Zinc finger, C2H2 type
CPIJ015405			0.00674121	0.00728646	0.0749858	0.0971711	579	133.976	445.024	13	3	9.82785	3.17215	serine protease	3	F:carbohydrate binding; P:proteolysis; F:serine-type endopeptidase activity	EC:3.4.21.0	PF00059	Lectin C-type domain
CPIJ012988			0.00673974	0.00687005	0.03288	0.208943	717	123.505	593.495	8	4	3.99189	4.00811	conserved hypothetical protein	0	-		PF11781	RNA polymerase I-specific transcription initiation factor Rrn7
CPIJ002982			0.00673343	0.00733564	0.05715	0.128358	2142	508.357	1633.64	40	11	28.3188	11.6812	integrin alpha-ps5	3	C:integrin complex; P:cell adhesion; P:integrin-mediated signaling pathway	-	PF08441	Integrin alpha
CPIJ014596			0.00673245	0.00798562	0.18359	0.043497	1659	322.192	1336.81	64	9	54.2155	9.78447	conserved hypothetical protein	5	P:regulation of transcription, DNA-dependent; F:sequence-specific DNA binding; F:zinc ion binding; C:nucleus; F:sequence-specific DNA binding transcription factor activity		PF04500	FLYWCH zinc finger domain
CPIJ008213			0.00672975	0.00584751	0.0177254	0.329894	219	70.4056	148.594	2	1	1.17907	0.820934	cral trio domain-containing protein	3	C:intracellular; P:transport; F:transporter activity	-	PF00650	CRAL/TRIO domain
CPIJ007826			0.0067289	0.00833054	0.0762928	0.109192	777	182.549	594.451	18	4	13.2785	4.72146	aael005112- partial	1	F:hydrolase activity	-	PF00135	Carboxylesterase family
CPIJ001671			0.00672745	0.00672972	0.226943	0.0296538	534	88.0656	445.934	20	3	17.3889	2.61107	exonuclease	3	F:exonuclease activity; P:nucleic acid phosphodiester bond hydrolysis; P:DNA repair	-	PF00752	XPG N-terminal domain
CPIJ005325			0.00672362	0.00733423	0.110951	0.0661034	372	74.5405	297.459	10	2	7.9127	2.0873	hypothetical protein CpipJ_CPIJ005325	0	-
CPIJ008255			0.00672057	0.008153	0.226873	0.0359364	354	56.4062	297.594	14	2	11.7687	2.23131	conserved hypothetical protein	0	-
CPIJ017459			0.00671472	0.00696787	0.0482827	0.144314	402	104.147	297.853	7	2	4.95495	2.04505	2-succinylbenzoate- ligase	3	F:ligase activity; P:metabolic process; F:monooxygenase activity	-	PF13193	Domain of unknown function (DUF4009)
CPIJ801815			0.00671032	0.00823352	0.106719	0.0771512	1230	186.83	1043.17	27	7	18.8709	8.12913	trna methyltransferase	4	P:regulation of translational initiation; P:methylation; F:translation initiation factor activity; F:methyltransferase activity	EC:2.1.1.0	PF04189	Gcd10p family
CPIJ800188			0.00671029	0.00715407	0.134402	0.0532291	777	180.901	596.099	26	4	22.1202	3.87984	cytochrome p450 6a9	6	F:heme binding; F:oxidoreductase activity, acting on paired donors, with incorporation or reduction of molecular oxygen; F:monooxygenase activity; F:iron ion binding; F:electron carrier activity; P:oxidation-reduction process	-	PF00067	Cytochrome P450
CPIJ013462			0.00669997	0.00718419	0.110983	0.0647323	375	76.491	298.509	10	2	7.98326	2.01674	phosphatidylinositol transfer protein sec14	3	C:intracellular; P:transport; F:transporter activity	-	PF03765	CRAL/TRIO, N-terminal domain
CPIJ017450			0.00669929	0.0079874	0.0749444	0.106578	4728	846.991	3881.01	93	26	62.4852	30.5148	mushroom body defect protein	0	-
CPIJ005457			0.00669853	0.0077738	0.124316	0.0625328	384	85.4268	298.573	12	2	9.84771	2.15229	serine collagenase 1	2	P:proteolysis; F:serine-type endopeptidase activity	EC:3.4.21.0	PF00089	Trypsin
CPIJ011648			0.00669833	0.00672025	0.0374208	0.179586	558	110.127	447.873	7	3	4.04542	2.95458	mpv17 protein	1	C:integral to membrane	-	PF04117	Mpv17 / PMP22 family
CPIJ009642			0.00669593	0.00715295	0.128642	0.0556037	387	88.3112	298.689	12	2	10.1005	1.89954	immunophilin fkbp46	0	-
CPIJ801911			0.0066888	0.00672242	0.07362	0.0913124	1452	255.973	1196.03	26	8	18.2244	7.77555	AGAP012973-PA	11	F:transmembrane signaling receptor activity; C:integral to membrane; C:membrane; P:mRNA processing; C:nucleus; F:G-protein coupled receptor activity; C:cytoplasm; P:neuropeptide signaling pathway; F:RNA binding; P:cell surface receptor signaling pathway; P:G-protein coupled receptor signaling pathway
CPIJ010073			0.00668728	0.0103411	0.0469469	0.220273	2562	618.013	1943.99	47	13	27.7634	19.2366	tudor domain-containing protein 3	4	F:RNA binding; C:cytoplasm; P:mRNA processing; C:nucleus		PF08585	Domain of unknown function (DUF1767)
CPIJ014683		X	0.00668631	0.0122893	0.0940673	0.130644	609	160.322	448.678	18	3	13.1808	4.8192	zinc finger protein	3	F:nucleic acid binding; C:nucleus; F:zinc ion binding	-	PF13894	C2H2-type zinc finger
CPIJ010687			0.00668288	0.00672453	0.153069	0.0439315	159	9.36366	149.636	2	1	1.17505	0.824945	ornithine decarboxylase	2	P:polyamine biosynthetic process; F:catalytic activity	-	PF00278	Pyridoxal-dependent decarboxylase, C-terminal sheet domain
CPIJ018492			0.00668219	0.00663746	0.0728253	0.0911422	1359	311.439	1047.56	28	7	21.4302	6.56979	conserved hypothetical protein	1	F:transferase activity, transferring acyl groups other than amino-acyl groups	EC:2.3.1.0	PF01757	Acyltransferase family
CPIJ011381			0.00667888	0.00716852	0.02961	0.242098	1404	355.915	1048.08	18	7	10.5084	7.49163	serine-type enodpeptidase	2	F:serine-type endopeptidase activity; P:proteolysis	EC:3.4.21.0	PF00089	Trypsin
CPIJ005212			0.00667646	0.00751965	0.0556168	0.135205	1731	382.978	1348.02	30	9	20.3266	9.67341	oligo- -glucosidase	3	P:carbohydrate metabolic process; F:cation binding; F:catalytic activity	-	PF00128	Alpha amylase, catalytic domain
CPIJ015560			0.0066752	0.00686108	0.0411362	0.166789	603	153.575	449.425	9	3	6.04799	2.95201	nudix hydrolase 3	1	F:hydrolase activity	-	PF00293	NUDIX domain
CPIJ018778			0.00667054	0.0068645	0.102852	0.0667412	1245	195.609	1049.39	26	7	19.1451	6.8549	aael001782- partial	0	-		PF13886	Domain of unknown function (DUF4203)
CPIJ018610			0.00666956	0.00767077	0.10437	0.0734957	600	150.195	449.805	17	3	13.9332	3.06677	serine proteinase stubble	2	F:serine-type endopeptidase activity; P:proteolysis	EC:3.4.21.0	PF00089	Trypsin
CPIJ002021			0.00666885	0.00729317	0.0822009	0.0887238	360	60.0977	299.902	7	2	4.85183	2.14817	leucine rich	0	-
CPIJ801940			0.00666813	0.00749577	0.0612433	0.122393	1305	255.233	1049.77	23	7	15.2987	7.70134	hepatoma-derived gf	0	-		PF00855	PWWP domain
CPIJ006839			0.00666738	0.00772072	0.0490353	0.157452	357	57.0324	299.968	5	2	2.73503	2.26497	predicted protein	1	F:serine-type endopeptidase inhibitor activity	-	PF00014	Kunitz/Bovine pancreatic trypsin inhibitor domain
CPIJ014310			0.0066595	0.00766001	0.0820371	0.0933726	1362	310.872	1051.13	32	7	24.3214	7.6786	non-cyanogenic beta-glucosidase	3	P:carbohydrate metabolic process; F:hydrolase activity, hydrolyzing O-glycosyl compounds; F:cation binding	EC:3.2.1.0	PF00232	Glycosyl hydrolase family 1
CPIJ014709			0.00665364	0.00787813	0.0771855	0.102067	939	187.532	751.468	19	5	13.4848	5.51525	zinc finger protein 624	3	F:nucleic acid binding; C:intracellular; F:zinc ion binding	-	PF13465	Zinc-finger double domain
CPIJ004118			0.00665312	0.0075278	0.0426986	0.176301	342	41.3893	300.611	4	2	1.75402	2.24598	rabaptin-5	0	-
CPIJ014533			0.00665031	0.00672255	0.0667267	0.100747	1896	392.312	1503.69	35	10	25.2497	9.75027	aael001406- partial	3	P:proteolysis; F:metallocarboxypeptidase activity; F:zinc ion binding	EC:3.4.17.0	PF00246	Zinc carboxypeptidase
CPIJ018302			0.00664977	0.0087224	0.139064	0.062722	687	85.4749	601.525	17	4	11.7941	5.20593	conserved hypothetical protein	0	-		PF04502	Family of unknown function (DUF572)
CPIJ007662			0.00664646	0.0073126	0.0618047	0.118318	1299	396.264	902.736	29	6	22.8429	6.15712	conserved hypothetical protein	3	C:extracellular region; F:chitin binding; P:chitin metabolic process	-	PF01607	Chitin binding Peritrophin-A domain
CPIJ801978			0.0066439	0.00687336	0.0521762	0.131734	339	37.9719	301.028	4	2	1.95662	2.04338	sensory appendage protein	0	-		PF03392	Insect pheromone-binding family, A10/OS-D
CPIJ002961			0.00664356	0.00686825	0.0677072	0.101441	2436	629.74	1806.26	52	12	40.2802	11.7198	conserved hypothetical protein	4	F:protein dimerization activity; C:integral to membrane; C:membrane; F:O-acyltransferase activity
CPIJ009608			0.00664336	0.00676264	0.133492	0.0506595	915	162.369	752.631	26	5	21.0557	4.94435	malic enzyme	5	F:NAD binding; F:metal ion binding; F:malate dehydrogenase (oxaloacetate-decarboxylating) activity; P:malate metabolic process; P:oxidation-reduction process	EC:1.1.1.38	PF03949	Malic enzyme, NAD binding domain
CPIJ014716			0.00664237	0.00767854	0.0776406	0.0988984	921	168.257	752.743	18	5	12.4788	5.52123	zinc finger protein 337	2	C:nucleus; F:zinc ion binding	-	PF07776	Zinc-finger associated domain (zf-AD)
CPIJ800112		X	0.00664013	0.0125581	0.118217	0.106229	357	55.8015	301.199	10	2	6.3557	3.6443	endochitinase a	3	F:chitinase activity; P:chitin catabolic process; P:cell wall macromolecule catabolic process	EC:3.2.1.14	PF00182	Chitinase class I
CPIJ012831			0.00663991	0.0117088	0.116516	0.100491	399	97.791	301.209	14	2	10.6909	3.30911	fibrinogen and fibronectin	3	C:extracellular space; P:signal transduction; F:receptor binding	-	PF00147	Fibrinogen beta and gamma chains, C-terminal globular domain
CPIJ008228			0.00663385	0.00791937	0.130928	0.0604863	174	23.2579	150.742	4	1	2.8735	1.1265	predicted protein	0	-		PF07648	Kazal-type serine protease inhibitor domain
CPIJ007148			0.00662787	0.00621989	0.0924635	0.0672686	363	61.2439	301.756	7	2	5.25746	1.74254	conserved hypothetical protein	0	-
CPIJ015064			0.00662221	0.00724847	0.0992224	0.0730528	561	107.979	453.021	13	3	9.95033	3.04967	conserved hypothetical protein	0	-		PF00536	SAM domain (Sterile alpha motif)
CPIJ004295			0.0066156	0.00722965	0.0561308	0.1288	1836	475.584	1360.42	35	9	25.5767	9.42332	conserved hypothetical protein	0	-
CPIJ001776			0.00661395	0.0113787	0.0742723	0.153203	798	193.218	604.782	20	4	13.5178	6.48221	synaptic vesicle protein	2	C:integral to membrane; P:transmembrane transport	-	PF07690	Major Facilitator Superfamily
CPIJ018911			0.00661377	0.00665651	0.0603047	0.110381	855	250.201	604.799	18	4	14.2088	3.79119	conserved hypothetical protein	1	F:structural constituent of cuticle	-	PF00379	Insect cuticle protein
CPIJ002787			0.00661314	0.00710285	0.0950022	0.0747651	1026	269.93	756.07	29	5	23.9785	5.02148	aael000905- partial	1	F:hydrolase activity	-	PF00135	Carboxylesterase family
CPIJ017645			0.00660783	0.00797588	0.109686	0.0727156	1101	192.987	908.013	27	6	20.1173	6.88273	poly -specific ribonuclease	7	C:cytoplasm; F:poly(A)-specific ribonuclease activity; P:mRNA catabolic process; F:metal ion binding; F:RNA binding; C:nucleus; F:nucleotide binding	EC:3.1.13.4	PF08675	RNA binding domain
CPIJ012610			0.00660432	0.00815261	0.0158484	0.514413	201	49.5843	151.416	2	1	0.777949	1.22205	zinc finger protein 38	3	F:nucleic acid binding; C:nucleus; F:zinc ion binding	-	PF00096	Zinc finger, C2H2 type
CPIJ011429			0.00660192	0.00713508	0.0627199	0.113761	1995	480.289	1514.71	39	10	28.7024	10.2976	conserved hypothetical protein	0	-
CPIJ011047			0.00659963	0.00857596	0.159547	0.0537519	1149	239.858	909.142	43	6	35.7221	7.27794	arylsulfatase b	2	P:metabolic process; F:sulfuric ester hydrolase activity	EC:3.1.6.0	PF00884	Sulfatase
CPIJ000055			0.00659523	0.00763732	0.0170102	0.448984	606	151.126	454.874	6	3	2.55168	3.44832	u428_drome ame: full=upf0428 protein cg16865	0	-
CPIJ009296			0.00659432	0.00626089	0.0898957	0.0696461	2793	669.958	2123.04	68	14	55.7056	12.2944	conserved hypothetical protein	0	-
CPIJ801622		X	0.00659105	0.0120145	0.0917282	0.130979	1842	324.787	1517.21	46	10	28.5385	17.4615	sodium solute symporter	3	P:transmembrane transport; C:integral to membrane; F:transporter activity	-	PF00474	Sodium:solute symporter family
CPIJ001837			0.00658715	0.00669924	0.135693	0.0493706	624	168.568	455.432	23	3	20.2931	2.70686	cuticle protein	1	F:structural constituent of cuticle	-	PF00379	Insect cuticle protein
CPIJ007159			0.00658614	0.00781465	0.0899332	0.0868938	555	99.4981	455.502	12	3	8.58492	3.41508	forkhead box protein	4	F:sequence-specific DNA binding transcription factor activity; F:sequence-specific DNA binding; C:nucleus; P:regulation of transcription, DNA-dependent	-	PF00250	Fork head domain
CPIJ013169			0.00658527	0.00668917	0.205335	0.0325769	564	108.438	455.562	21	3	18.4719	2.52807	alpha-glucosidase	3	P:carbohydrate metabolic process; F:cation binding; F:catalytic activity	-	PF00128	Alpha amylase, catalytic domain
CPIJ015670			0.00658273	0.00662968	0.0854992	0.0775408	801	193.349	607.651	19	4	15.2771	3.72293	4-coumarate- ligase 3	2	F:ligase activity; P:metabolic process	-	PF00501	AMP-binding enzyme
CPIJ013425			0.00657432	0.00668245	0.0156566	0.426812	435	130.786	304.214	4	2	2.00725	1.99275	26s protease regulatory subunit 6a	2	F:peptidase activity; P:proteolysis	-
CPIJ005559			0.00657273	0.00739614	0.0880641	0.0839859	765	156.425	608.575	17	4	12.8133	4.18674	juvenile hormone-inducible protein	1	F:transferase activity, transferring phosphorus-containing groups	-	PF02958	Ecdysteroid kinase
CPIJ006766			0.00657231	0.00709396	0.0888273	0.0798624	960	199.233	760.767	22	5	16.8588	5.14116	conserved hypothetical protein	2	C:intracellular; F:zinc ion binding	-
CPIJ015094			0.00657144	0.00691981	0.0636482	0.10872	1557	339.615	1217.39	29	8	20.8676	8.13244	trypsin ii-p29	2	P:proteolysis; F:serine-type endopeptidase activity	EC:3.4.21.0	PF00089	Trypsin
CPIJ009057			0.00657096	0.0065308	0.000130616	50	825	216.261	608.739	4	4	0.0282203	3.97178	caspase-3	3	P:apoptotic process; P:proteolysis; F:cysteine-type endopeptidase activity	EC:3.4.22.0	PF00656	Caspase domain
CPIJ003952			0.00656638	0.00655556	0.0419462	0.156285	531	74.1271	456.873	6	3	3.05617	2.94383	conserved hypothetical protein	3	C:extracellular region; F:chitin binding; P:chitin metabolic process	-	PF01607	Chitin binding Peritrophin-A domain
CPIJ000752			0.00656584	0.00653948	0.00013079	50	366	61.3933	304.607	2	2	0.00802961	1.99197	hypothetical protein CpipJ_CPIJ000752	0	-
CPIJ006947			0.00656561	0.00704597	0.0481452	0.146348	867	257.765	609.235	16	4	11.888	4.11203	integrin beta-ps	6	F:receptor activity; P:cell-matrix adhesion; P:integrin-mediated signaling pathway; P:multicellular organismal development; F:receptor binding; C:integrin complex	-	PF07965	Integrin beta tail domain
CPIJ800192			0.00656478	0.00667362	0.139568	0.0478164	747	137.688	609.312	22	4	18.1578	3.84224	cytochrome p450	6	F:heme binding; F:oxidoreductase activity, acting on paired donors, with incorporation or reduction of molecular oxygen; F:monooxygenase activity; F:iron ion binding; F:electron carrier activity; P:oxidation-reduction process	-	PF00067	Cytochrome P450
CPIJ013937			0.00656434	0.00725514	0.0149929	0.483904	588	130.985	457.015	5	3	1.85986	3.14014	anopheles gambiae pest agap012596-pa	0	-
CPIJ019303			0.00656265	0.00677996	0.110007	0.0616319	1119	204.735	914.265	27	6	21.1727	5.82726	transcription termination factor 2	3	F:ATP binding; F:helicase activity; F:DNA binding	-	PF00176	SNF2 family N-terminal domain
CPIJ018644			0.0065517	0.00702754	0.0931664	0.07543	771	160.471	610.529	19	4	14.7632	4.23678	conserved hypothetical protein	3	P:regulation of transcription, DNA-dependent; F:sequence-specific DNA binding; F:sequence-specific DNA binding transcription factor activity
CPIJ007871			0.00654759	0.00567327	0.113128	0.0501489	204	51.2716	152.728	6	1	5.22019	0.779812	vitamin k-dependent protein c	2	F:serine-type endopeptidase activity; P:proteolysis	EC:3.4.21.0	PF13895	Immunoglobulin domain
CPIJ015208			0.00654593	0.00752645	0.0820103	0.0917745	798	186.933	611.067	19	4	14.6154	4.38464	pcdc2 rp-8	3	F:zinc ion binding; F:metal ion binding; C:cytoplasm	-	PF04194	Programmed cell death protein 2, C-terminal putative domain
CPIJ009099			0.00654507	0.00670538	0.0478177	0.140228	630	171.64	458.36	11	3	8.00305	2.99695	retininc containing cg13043-like protein	0	-		PF04527	Drosophila Retinin like protein
CPIJ000318			0.00654485	0.00644308	0.110576	0.0582684	195	42.2083	152.792	5	1	4.12906	0.870936	cytochrome b5	2	F:heme binding; F:metal ion binding	-	PF00173	Cytochrome b5-like Heme/Steroid binding domain
CPIJ016805			0.00654313	0.00801243	0.034408	0.232865	414	108.336	305.664	6	2	3.62097	2.37903	conserved hypothetical protein	0	-
CPIJ004022			0.00654183	0.00730437	0.114586	0.0637455	600	141.413	458.587	18	3	14.9165	3.08353	apolipoprotein a binding protein	3	F:metal ion binding; F:NADHX epimerase activity; F:nucleotide binding	-	PF03853	YjeF-related protein N-terminus
CPIJ005437			0.00653942	0.00656641	0.13554	0.0484461	1503	279.649	1223.35	42	8	34.6554	7.34461	aael003735- partial	1	F:nucleotide binding	-	PF03467	Smg-4/UPF3 family
CPIJ012656			0.0065362	0.00820321	0.0154694	0.530285	207	54.0062	152.994	2	1	0.799284	1.20072	conserved hypothetical protein	0	-
CPIJ002366			0.00653505	0.00709339	0.0610314	0.116225	354	47.958	306.042	5	2	2.87078	2.12922	conserved hypothetical protein	0	-
CPIJ011963			0.00653189	0.00776623	0.0304851	0.254755	4050	988.097	3061.9	53	20	29.6183	23.3817	multidrug resistance-associated protein 1	5	P:transmembrane transport; C:integral to membrane; F:ATPase activity, coupled to transmembrane movement of substances; P:ATP catabolic process; F:ATP binding	-	PF00664	ABC transporter transmembrane region
CPIJ009623			0.00653151	0.0069901	0.011158	0.626467	537	77.6877	459.312	4	3	0.850366	3.14963	conserved hypothetical protein	4	P:oxidation-reduction process; P:cellular amino acid metabolic process; F:oxidoreductase activity; F:nucleotide binding
CPIJ005735			0.00653053	0.00631105	0.0365634	0.172606	210	56.8729	153.127	3	1	2.04816	0.951842	conserved protein	0	-
CPIJ007455			0.00653013	0.00715294	0.0224418	0.318732	540	80.5907	459.409	5	3	1.77497	3.22503	small calcium-binding mitochondrial carrier	3	C:integral to membrane; F:calcium ion binding; P:transmembrane transport	-	PF13499	EF-hand domain pair
CPIJ004638			0.00653	0.00685931	0.15536	0.044151	750	137.443	612.557	23	4	19.2184	3.78163	FAM8A1	0	-		PF06271	RDD family
CPIJ014718			0.00652684	0.00668782	0.126254	0.052971	1128	208.719	919.281	30	6	24.3249	5.67513	serine protease inhibitor serpin-4	3	F:serine-type endopeptidase inhibitor activity; P:proteolysis; F:peptidase activity	-	PF00079	Serpin (serine protease inhibitor)
CPIJ016364			0.00652381	0.00764731	0.091682	0.0834112	942	175.577	766.423	21	5	15.3947	5.60529	conserved hypothetical protein	0	-
CPIJ017200			0.00651389	0.00629603	0.0342907	0.183608	837	222.928	614.072	11	4	7.30528	3.69472	cytochrome p450	6	F:heme binding; F:oxidoreductase activity, acting on paired donors, with incorporation or reduction of molecular oxygen; F:monooxygenase activity; F:iron ion binding; F:electron carrier activity; P:oxidation-reduction process	-	PF00067	Cytochrome P450
CPIJ011173			0.0065102	0.00761351	0.0839775	0.0906613	375	67.7898	307.21	8	2	5.6703	2.3297	zinc finger protein 546	3	F:zinc ion binding; F:nucleic acid binding; C:intracellular	-	PF05485	THAP domain
CPIJ012601			0.00649953	0.00741397	0.101149	0.0732976	789	173.571	615.429	21	4	16.6681	4.33189	zinc finger protein	3	F:zinc ion binding; F:nucleic acid binding; C:intracellular	-	PF13465	Zinc-finger double domain
CPIJ000842			0.00649763	0.00682245	0.0934741	0.0729876	1752	366.876	1385.12	41	9	32.1427	8.8573	conserved hypothetical protein	0	-
CPIJ003643			0.00649693	0.00791491	0.0691009	0.114541	957	187.406	769.594	19	5	12.9219	6.07808	conserved hypothetical protein	0	-
CPIJ008855			0.00649576	0.00705709	0.0595362	0.118534	1209	285.321	923.679	23	6	16.6217	6.37833	maltose phosphorylase	2	F:catalytic activity; P:carbohydrate metabolic process	-	PF03632	Glycosyl hydrolase family 65 central catalytic domain
CPIJ002547			0.00649524	0.00737344	0.0529474	0.13926	2109	569.405	1539.59	40	10	29.0584	10.9416	conserved hypothetical protein	2	F:zinc ion binding; F:metal ion binding	-	PF00412	LIM domain
CPIJ006910			0.00649213	0.00791085	0.0599428	0.131973	1179	254.804	924.196	22	6	14.8781	7.12185	conserved hypothetical protein	0	-
CPIJ006009			0.00649182	0.00683067	0.157517	0.0433646	1479	246.684	1232.32	43	8	35.3436	7.65643	zinc finger protein 585a	3	F:zinc ion binding; F:nucleic acid binding; C:intracellular	-	PF12874	Zinc-finger of C2H2 type
CPIJ014058			0.00648976	0.00674697	0.0636264	0.10604	987	216.556	770.444	18	5	13.0694	4.93059	nadp-dependent leukotriene b4 12-hydroxydehydrogenase	4	F:zinc ion binding; F:oxidoreductase activity; P:oxidation-reduction process; F:nucleotide binding	-	PF00107	Zinc-binding dehydrogenase
CPIJ007354			0.0064874	0.00676851	0.170119	0.039787	381	72.7096	308.29	13	2	11.1235	1.87651	testis-specific serine threonine-protein kinase 6	3	P:protein phosphorylation; F:ATP binding; F:protein serine/threonine kinase activity	EC:2.7.11.0	PF00069	Protein kinase domain
CPIJ013708			0.00648379	0.00634926	0.132379	0.0479628	570	107.308	462.692	16	3	13.2581	2.74187	conserved hypothetical protein	0	-		PF12248	Farnesoic acid 0-methyl transferase
CPIJ009277			0.00647934	0.00692207	0.0467325	0.148121	789	171.653	617.347	12	4	7.82924	4.17076	wd repeat protein 85	0	-		PF00400	WD domain, G-beta repeat
CPIJ005156			0.00647685	0.00647345	0.0438357	0.147675	933	161.02	771.98	12	5	7.02576	4.97424	conserved hypothetical protein	0	-		PF13414	TPR repeat
CPIJ017625			0.0064709	0.00679924	0.0895327	0.0759415	393	83.9239	309.076	9	2	7.03302	1.96698	conserved hypothetical protein	4	P:cell redox homeostasis; F:electron carrier activity; F:protein disulfide oxidoreductase activity; P:glycerol ether metabolic process	-	PF00085	Thioredoxin
CPIJ006800			0.00646425	0.0065582	0.000131164	50	411	101.606	309.394	2	2	0.0130504	1.98695	conserved hypothetical protein	0	-
CPIJ001826			0.00646177	0.00668949	0.0368753	0.181408	1179	250.462	928.538	15	6	8.96843	6.03157	conserved hypothetical protein	1	F:nucleotide binding
CPIJ014328			0.00645893	0.00645185	0.0460012	0.140254	402	92.351	309.649	6	2	4.08089	1.91911	hypothetical protein CpipJ_CPIJ014328	2	F:zinc ion binding; C:intracellular	-
CPIJ005827			0.00645808	0.00688165	0.111787	0.0615606	753	133.621	619.379	18	4	14.0039	3.99608	zinc finger homeobox 1a	3	F:DNA binding; C:intracellular; F:zinc ion binding	-	PF00096	Zinc finger, C2H2 type
CPIJ006169			0.00645625	0.00681015	0.0494747	0.137649	1167	237.668	929.332	18	6	11.7017	6.29829	wd repeat protein 74	0	-		PF00400	WD domain, G-beta repeat
CPIJ001259			0.0064515	0.00774373	0.0811055	0.0954772	1167	236.984	930.016	25	6	18.1859	6.81406	conserved hypothetical protein	0	-
CPIJ800234			0.00645146	0.00689599	0.125171	0.0550928	1587	346.974	1240.03	47	8	39.2684	7.73162	cytochrome p450 17a1	6	F:heme binding; F:oxidoreductase activity, acting on paired donors, with incorporation or reduction of molecular oxygen; F:monooxygenase activity; F:iron ion binding; F:electron carrier activity; P:oxidation-reduction process	-	PF00067	Cytochrome P450
CPIJ018222			0.00645144	0.00746738	0.143675	0.0519742	975	199.979	775.021	31	5	25.8027	5.19734	alpha-amylase a	3	F:hydrolase activity, acting on glycosyl bonds; P:carbohydrate metabolic process; F:cation binding	-	PF00128	Alpha amylase, catalytic domain
CPIJ802204			0.00644878	0.00798405	0.0443547	0.180005	219	63.9315	155.068	4	1	2.78434	1.21566	steroid dehydrogenase	3	F:oxidoreductase activity; P:oxidation-reduction process; F:nucleotide binding	-	PF00106	short chain dehydrogenase
CPIJ017035			0.00644831	0.00785745	0.135221	0.0581083	744	123.682	620.318	20	4	15.4866	4.5134	zinc finger protein 141	3	F:nucleic acid binding; C:nucleus; F:zinc ion binding	-	PF07776	Zinc-finger associated domain (zf-AD)
CPIJ001966			0.00644766	0.00628904	0.210726	0.0298446	543	77.7153	465.285	16	3	13.5745	2.4255	nucleosome assembly protein	2	P:nucleosome assembly; C:nucleus	-	PF00956	Nucleosome assembly protein (NAP)
CPIJ004441			0.00644629	0.00669516	0.0519611	0.12885	795	174.488	620.512	13	4	8.91503	4.08497	trna (5-methylaminomethyl-2-thiouridylate)-methyltransferase	5	C:cytoplasm; P:methylation; F:sulfurtransferase activity; F:methyltransferase activity; P:tRNA processing	EC:2.8.1.0; EC:2.1.1.0	PF03054	tRNA methyl transferase
CPIJ010023			0.00644587	0.00752852	0.0133401	0.564351	222	66.8618	155.138	2	1	0.866006	1.13399	hypothetical protein CpipJ_CPIJ010023	0	-
CPIJ013451			0.00644434	0.00796821	0.094169	0.084616	1536	294.604	1241.4	35	8	25.8007	9.19932	zinc finger protein	3	F:zinc ion binding; F:nucleic acid binding; C:intracellular	-	PF12874	Zinc-finger of C2H2 type
CPIJ018571			0.00644425	0.00774073	0.186438	0.041519	372	61.6465	310.354	13	2	10.7525	2.24752	oligo- -glucosidase	3	P:carbohydrate metabolic process; F:cation binding; F:catalytic activity	-	PF00128	Alpha amylase, catalytic domain
CPIJ802402			0.00644084	0.00800156	0.0701087	0.114131	1113	181.445	931.555	19	6	11.9801	7.01988	lupus la ribonucleoprotein	5	F:RNA binding; C:ribonucleoprotein complex; C:nucleus; F:nucleotide binding; P:RNA processing	-	PF05383	La domain
CPIJ000010			0.00643909	0.00726961	0.0342659	0.212153	1062	285.493	776.507	15	5	9.51154	5.48846	brain chitinase and chia	6	F:chitinase activity; P:carbohydrate metabolic process; P:chitin catabolic process; F:cation binding; F:chitin binding; C:extracellular region	EC:3.2.1.14	PF00704	Glycosyl hydrolases family 18
CPIJ007344			0.00643572	0.0066058	0.0237435	0.278215	840	218.469	621.531	9	4	5.02371	3.97629	conserved hypothetical protein	0	-
CPIJ012204			0.00643485	0.00683293	0.145313	0.0470222	564	97.789	466.211	15	3	12.2531	2.74689	aael014710- partial	3	P:carbohydrate metabolic process; F:cation binding; F:catalytic activity	-	PF00128	Alpha amylase, catalytic domain
CPIJ000047			0.0064339	0.00685836	0.0172554	0.397462	1206	273.44	932.56	11	6	4.66986	6.33014	carboxylesterase	2	P:metabolic process; F:hydrolase activity	-	PF00135	Carboxylesterase family
CPIJ006110			0.00643287	0.00498553	0.155725	0.0320149	528	61.6452	466.355	11	3	8.85527	2.14473	isoform b	0	-		PF07258	HCaRG protein
CPIJ016385			0.00643252	0.00651865	0.0468039	0.139276	1350	261.778	1088.22	19	7	12.0331	6.96687	isoform d	0	-		PF00498	FHA domain
CPIJ005452			0.00642758	0.00633221	0.110025	0.0575527	750	127.682	622.318	17	4	13.276	3.72403	m-type 9 protein	0	-
CPIJ013285			0.00642085	0.00724918	0.0649075	0.111685	6780	1951.98	4828.02	154	31	120.667	33.3331	conserved hypothetical protein	0	-
CPIJ801973			0.00641865	0.00651944	0.0403069	0.161745	573	105.612	467.388	7	3	4.07972	2.92028	ef-hand domain-containing family member b-like	0	-
CPIJ007259			0.00641752	0.00709385	0.116236	0.0610296	2937	599.646	2337.35	81	15	65.4341	15.5659	dna-dependent protein kinase catalytic subunit	6	P:double-strand break repair via nonhomologous end joining; F:DNA binding; F:DNA-dependent protein kinase activity; P:phosphorylation; F:ATP binding; C:nucleus	-	PF00454	Phosphatidylinositol 3- and 4-kinase
CPIJ010746			0.0064041	0.00720281	0.15761	0.0457002	1542	292.802	1249.2	51	8	42.6788	8.32124	norepinephrine norepinephrine transporter	3	C:integral to membrane; F:neurotransmitter:sodium symporter activity; P:neurotransmitter transport	-	PF00209	Sodium:neurotransmitter symporter family
CPIJ000061			0.0063996	0.00356731	0.00967323	0.368782	1122	340.701	781.299	6	5	3.25081	2.74919	conserved hypothetical protein	0	-		PF07786	Protein of unknown function (DUF1624)
CPIJ019030			0.00639947	0.00663638	0.0762325	0.0870544	393	80.4738	312.526	8	2	5.9787	2.0213	chymotrypsin bii	2	F:serine-type endopeptidase activity; P:proteolysis	EC:3.4.21.0	PF00089	Trypsin
CPIJ016881			0.00639578	0.00628356	0.0646513	0.0971915	378	65.2943	312.706	6	2	4.09426	1.90574	conserved hypothetical protein	2	F:phosphotransferase activity, alcohol group as acceptor; P:carbohydrate metabolic process	EC:2.7.1.0	PF04587	ADP-specific Phosphofructokinase/Glucokinase conserved region
CPIJ013791			0.00639482	0.00709773	0.106115	0.0668872	405	92.247	312.753	11	2	8.96661	2.03339	cuticle protein	3	F:structural constituent of cuticle; F:catalytic activity; P:metabolic process	-	PF00379	Insect cuticle protein
CPIJ013173			0.00638416	0.00672245	0.145213	0.0462939	1731	321.259	1409.74	52	9	43.22	8.77996	neutral and basic amino acid transport protein rbat	3	F:maltose alpha-glucosidase activity; P:carbohydrate metabolic process; F:cation binding	EC:3.2.1.20	PF00128	Alpha amylase, catalytic domain
CPIJ018155			0.00637621	0.0074368	0.0595197	0.124947	1419	321.174	1097.83	26	7	18.2189	7.78111	luciferin 4-monooxygenase	2	P:metabolic process; F:monooxygenase activity	-	PF00501	AMP-binding enzyme
CPIJ016733			0.00637048	0.00631131	0.068481	0.0921614	429	115.052	313.948	9	2	7.19145	1.80855	chaperone protein dnaj 2	3	P:protein folding; F:heat shock protein binding; F:unfolded protein binding	-	PF00226	DnaJ domain
CPIJ801556			0.00636676	0.00862853	0.0657624	0.131208	633	161.803	471.197	14	3	10.1295	3.87047	hypothetical conserved secreted protein	0	-
CPIJ005803			0.00636425	0.00710487	0.0891603	0.0796865	780	151.489	628.511	17	4	12.7761	4.22392	nuclear body associated kinase	4	F:kinase activity; P:phosphorylation; C:intracellular; P:intracellular signal transduction	-
CPIJ014594			0.00636371	0.0057782	0.0721372	0.0801001	360	45.7177	314.282	5	2	3.22447	1.77553	predicted protein	2	C:nucleus; F:zinc ion binding	-	PF07776	Zinc-finger associated domain (zf-AD)
CPIJ017473			0.00636144	0.0064288	0.127366	0.050475	1419	318.621	1100.38	44	7	37.4685	6.53147	organic cation transporter	3	C:integral to membrane; P:transmembrane transport; F:transmembrane transporter activity	-	PF00083	Sugar (and other) transporter
CPIJ009918			0.00635857	0.00611469	0.152251	0.0401618	216	58.7322	157.268	9	1	8.12611	0.873894	conserved hypothetical protein	0	-
CPIJ000597			0.00634825	0.00719716	0.0361307	0.199198	1776	515.812	1260.19	27	8	18.1615	8.83853	conserved hypothetical protein	3	F:nucleic acid binding; C:nucleus; F:zinc ion binding	-	PF05485	THAP domain
CPIJ007559			0.00634264	0.00453678	0.0675765	0.0671355	213	55.3367	157.663	4	1	3.35773	0.642268	lethal malignant brain tumor	2	P:regulation of transcription, DNA-dependent; C:nucleus
CPIJ014655			0.00634248	0.00730687	0.0395666	0.184673	444	128.666	315.334	7	2	4.81896	2.18104	coagulation factor xii	5	F:serine-type endopeptidase activity; F:RNA-directed DNA polymerase activity; P:RNA-dependent DNA replication; F:RNA binding; P:proteolysis	EC:3.4.21.0; EC:2.7.7.49	PF00089	Trypsin
CPIJ007862			0.00634101	0.00657988	0.0655456	0.100386	600	126.889	473.111	11	3	8.00411	2.99589	mitochondrial ribosomal protein l50	2	C:ribosome; C:mitochondrion	-	PF10501	Ribosomal subunit 39S
CPIJ000971			0.00634021	0.00848135	0.129806	0.0653386	984	195.382	788.618	30	5	23.7393	6.26068	msta	0	-
CPIJ013816			0.00633768	0.0062812	0.0144399	0.434989	846	214.854	631.146	7	4	3.07313	3.92687	hypothetical protein CpipJ_CPIJ013816	0	-
CPIJ004274			0.00633592	0.00750746	0.0933799	0.0803969	975	185.848	789.152	23	5	17.1465	5.85353	golgin-84	0	-		PF09787	Golgin subfamily A member 5
CPIJ004222			0.00633582	0.00600391	0.0652363	0.0920332	1011	221.836	789.164	19	5	14.3137	4.68632	pancreatic triacylglycerol lipase	3	C:extracellular region; F:phosphatidylcholine 1-acylhydrolase activity; P:lipid metabolic process	EC:3.1.1.32	PF00151	Lipase
CPIJ016778			0.00633404	0.0073819	0.0625729	0.117973	222	64.1229	157.877	5	1	3.87458	1.12542	3-hydroxyacyl-coa dehyrogenase	4	P:fatty acid metabolic process; F:NAD+ binding; F:3-hydroxyacyl-CoA dehydrogenase activity; P:oxidation-reduction process	EC:1.1.1.35	PF00725	3-hydroxyacyl-CoA dehydrogenase, C-terminal domain
CPIJ006055			0.00633272	0.00798935	0.0377748	0.211499	1644	380.715	1263.28	24	8	14.1028	9.89724	conserved hypothetical protein	0	-
CPIJ003745			0.00632803	0.00577213	0.0544603	0.105988	180	21.9733	158.027	2	1	1.13492	0.86508	glutamine synthetase 2 (glutamate-amonia ligase)	3	F:glutamate-ammonia ligase activity; F:ATP binding; P:glutamine biosynthetic process	EC:6.3.1.2
CPIJ009713			0.00632688	0.0075854	0.0184738	0.410603	612	137.833	474.167	6	3	2.48701	3.51299	conserved hypothetical protein	0	-
CPIJ015252			0.0063235	0.00677084	0.0253553	0.267039	1215	266.159	948.841	13	6	6.65992	6.34008	zinc carboxypeptidase	3	P:proteolysis; F:metallocarboxypeptidase activity; F:zinc ion binding	EC:3.4.17.0	PF02244	Carboxypeptidase activation peptide
CPIJ015241			0.00631937	0.00623331	0.103979	0.0599477	783	150.026	632.974	18	4	14.3664	3.63363	alkaline phosphatase	2	P:dephosphorylation; F:phosphatase activity	EC:3.1.3.0	PF00245	Alkaline phosphatase
CPIJ000283			0.00631741	0.00654886	0.0481378	0.136044	2343	601.776	1741.22	38	11	27.2667	10.7333	conserved hypothetical protein	0	-
CPIJ008782			0.00631726	0.00617375	0.0596654	0.103473	411	94.407	316.593	7	2	5.19675	1.80325	zinc finger protein 600	3	F:nucleic acid binding; C:nucleus; F:zinc ion binding	-	PF13894	C2H2-type zinc finger
CPIJ004144			0.0063162	0.00603133	0.112895	0.0534244	780	146.708	633.292	19	4	15.4394	3.56059	zinc finger protein	3	F:nucleic acid binding; C:nucleus; F:zinc ion binding	-	PF00096	Zinc finger, C2H2 type
CPIJ015627			0.00631278	0.00764721	0.12054	0.063441	1650	382.726	1267.27	52	8	42.9729	9.02709	alpha-n-acetyl glucosaminidase	0	-		PF12971	Alpha-N-acetylglucosaminidase (NAGLU) N-terminal domain
CPIJ010886			0.00631181	0.00668716	0.0789953	0.0846525	792	158.267	633.733	16	4	11.9495	4.05048	conserved hypothetical protein	0	-		PF02410	Oligomerisation domain
CPIJ008644			0.00630548	0.00629077	0.0288302	0.218201	777	142.631	634.369	8	4	4.05993	3.94007	histone rna hairpin-binding protein	1	F:mRNA binding	-
CPIJ003581			0.00630006	0.00637342	0.0745132	0.0855341	600	123.814	476.186	12	3	9.02961	2.97039	chitin-binding protein	1	C:viral capsid	-	PF03067	Chitin binding domain
CPIJ020279			0.00629636	0.00588514	0.162186	0.0362863	378	60.3562	317.644	11	2	9.23618	1.76382	low-density lipoprotein receptor	3	F:calcium ion binding; C:integral to membrane; C:membrane		PF00057	Low-density lipoprotein receptor domain class A
CPIJ013927			0.00629632	0.00673949	0.148334	0.0454346	384	66.3535	317.646	11	2	9.03488	1.96512	conserved hypothetical protein	1	F:structural constituent of cuticle	-	PF00379	Insect cuticle protein
CPIJ008520			0.0062931	0.00940994	0.0880959	0.106815	816	180.383	635.617	21	4	15.2574	5.74264	major sperm protein	1	F:structural molecule activity	-	PF00650	CRAL/TRIO domain
CPIJ005903			0.00629204	0.00630663	0.000126133	50	207	48.0694	158.931	1	1	0.00601273	0.993987	conserved hypothetical protein	2	F:serine-type endopeptidase activity; P:proteolysis	EC:3.4.21.0	PF00089	Trypsin
CPIJ011309			0.00629148	0.0100924	0.0291777	0.345896	417	99.1101	317.89	6	2	2.84435	3.15565	neuroligin 5	0	-		PF00135	Carboxylesterase family
CPIJ004547			0.00628641	0.00686771	0.121509	0.0565202	1212	257.56	954.44	36	6	29.7657	6.23432	lariat debranching enzyme	2	F:hydrolase activity, acting on ester bonds; P:mRNA processing	-	PF05011	Lariat debranching enzyme, C-terminal domain
CPIJ001864			0.00628501	0.0061907	0.0517779	0.119563	1599	326.131	1272.87	24	8	16.3639	7.63612	pdz domain protein arc	0	-
CPIJ009568			0.00628492	0.00789361	0.050437	0.156504	417	98.7784	318.222	7	2	4.65367	2.34633	odorant-binding protein	1	F:odorant binding	-	PF01395	PBP/GOBP family
CPIJ013535			0.00627568	0.00967091	0.0210863	0.458635	645	166.964	478.036	8	3	3.45852	4.54148	gaba-b receptor	3	C:integral to membrane; F:G-protein coupled GABA receptor activity; P:G-protein coupled receptor signaling pathway	-	PF00003	7 transmembrane sweet-taste receptor of 3 GCPR
CPIJ018557			0.00627323	0.00811084	0.0221132	0.366788	1635	359.744	1275.26	18	8	7.82531	10.1747	conserved hypothetical protein	1	F:diacylglycerol O-acyltransferase activity	EC:2.3.1.20	PF06974	Protein of unknown function (DUF1298)
CPIJ011995			0.00627112	0.00686862	0.0600075	0.114463	1641	365.312	1275.69	29	8	20.7186	8.28142	daaf1_aedae ame: full=dynein assembly factor axonemal homolog ame: full=leucine-rich repeat-containing protein 50	3	P:cilium morphogenesis; F:dynein binding; C:cilium axoneme	-	PF13855	Leucine rich repeat
CPIJ019023			0.00627093	0.00636976	0.017755	0.358759	654	175.602	478.398	6	3	3.03432	2.96568	hypothetical protein CpipJ_CPIJ019023	1	F:nucleic acid binding
CPIJ007891			0.00626971	0.00806415	0.101043	0.0798088	1005	207.515	797.485	26	5	19.8973	6.10267	ribonucleasep mrp protein subunit pop1	2	P:tRNA 5'-leader removal; F:ribonuclease P activity	EC:3.1.26.5	PF06978	Ribonucleases P/MRP protein subunit POP1
CPIJ800292			0.00626961	0.00736823	0.139242	0.0529166	1239	282.002	956.998	43	6	36.4537	6.54626	cytochrome p450 2a12	6	F:heme binding; F:oxidoreductase activity, acting on paired donors, with incorporation or reduction of molecular oxygen; F:monooxygenase activity; F:iron ion binding; F:electron carrier activity; P:oxidation-reduction process	-	PF00067	Cytochrome P450
CPIJ013195			0.00626848	0.00666722	0.0840266	0.0793465	618	139.415	478.585	14	3	11.003	2.99701	conserved hypothetical protein	0	-
CPIJ009479			0.00626639	0.00667894	0.126616	0.0527498	993	195.092	797.908	28	5	23.0312	4.9688	alpha- glucosyltransferase alg10	2	F:transferase activity, transferring hexosyl groups; C:integral to membrane	EC:2.4.1.0	PF04922	DIE2/ALG10 family
CPIJ008404			0.00626185	0.00673266	0.0769644	0.0874776	615	135.908	479.092	13	3	9.93603	3.06397	mida_drome ame: full=protein mida mitochondrial	0	-		PF02636	Putative S-adenosyl-L-methionine-dependent methyltransferase
CPIJ003208			0.00626164	0.00679501	0.0279268	0.243315	426	106.595	319.405	5	2	2.89172	2.10828	aael009515- partial	2	C:nucleus; F:DNA binding		PF00855	PWWP domain
CPIJ005453			0.00625606	0.0067163	0.036618	0.183416	2319	720.546	1598.45	36	10	25.5884	10.4116	conserved hypothetical protein	0	-
CPIJ019684			0.00625324	0.00619349	0.0577449	0.107256	396	76.1661	319.834	6	2	4.13683	1.86317	conserved hypothetical protein	1	F:transferase activity, transferring phosphorus-containing groups	-	PF02958	Ecdysteroid kinase
CPIJ007827			0.00625062	0.00622603	0.0513774	0.121182	822	182.063	639.937	13	4	9.11676	3.88324	carboxylesterase 2	1	F:hydrolase activity	-	PF00135	Carboxylesterase family
CPIJ007636			0.00623943	0.0067664	0.0450451	0.150214	207	46.7292	160.271	3	1	1.97994	1.02006	nicotinic acetylcholine receptor subunit alpha 8	6	F:acetylcholine-activated cation-selective channel activity; C:postsynaptic membrane; C:cell junction; C:plasma membrane; P:ion transport; C:integral to membrane	-	PF02932	Neurotransmitter-gated ion-channel transmembrane region
CPIJ015221			0.00623451	0.00756302	0.016315	0.463561	426	105.205	320.795	4	2	1.65734	2.34266	conserved hypothetical protein	0	-
CPIJ007781			0.00623111	0.00628954	0.0416007	0.151188	213	52.5152	160.485	3	1	2.05195	0.948054	conserved hypothetical protein	0	-
CPIJ001291			0.00622901	0.00674973	0.0637288	0.105913	963	160.304	802.696	15	5	9.80173	5.19827	fatty acid hydroxylase	7	P:fatty acid biosynthetic process; P:sphingolipid metabolic process; F:oxidoreductase activity; F:iron ion binding; F:heme binding; C:endoplasmic reticulum; P:oxidation-reduction process	-	PF04116	Fatty acid hydroxylase superfamily
CPIJ003590			0.006229	0.00647275	0.180567	0.0358468	1227	263.764	963.236	49	6	43.328	5.672	conserved hypothetical protein	4	; F:DNA binding; P:transport; C:membrane	-	PF11977	Zc3h12a-like Ribonuclease NYN domain
CPIJ018602			0.00622336	0.00639632	0.0751963	0.0850617	789	146.26	642.74	15	4	10.9186	4.08142	steroid dehydrogenase	3	F:oxidoreductase activity; P:oxidation-reduction process; F:nucleotide binding	-	PF00106	short chain dehydrogenase
CPIJ013371			0.00622169	0.00619166	0.089066	0.0695177	615	132.816	482.184	14	3	11.1787	2.82131	conserved hypothetical protein	0	-		PF14214	Helitron helicase-like domain at N-terminus
CPIJ018600			0.00622104	0.00641801	0.0627491	0.10228	897	254.021	642.979	19	4	15.0926	3.90738	aael004046- partial	3	F:potassium channel activity; P:potassium ion transmembrane transport; C:integral to membrane	-	PF07885	Ion channel
CPIJ012584			0.00621534	0.00906448	0.121496	0.0746073	774	130.431	643.569	21	4	15.3495	5.65054	zinc finger protein 177	3	F:nucleic acid binding; C:nucleus; F:zinc ion binding	-	PF13894	C2H2-type zinc finger
CPIJ011187			0.00621436	0.00719124	0.0433294	0.165967	1092	287.412	804.588	18	5	12.2899	5.71005	deoxyribonuclease i	3	F:hydrolase activity; F:nucleic acid binding; F:metal ion binding	-	PF01223	DNA/RNA non-specific endonuclease
CPIJ802277			0.00621285	0.00720104	0.284264	0.0253322	540	57.13	482.87	18	3	14.8257	3.17434	hepatocellular carcinoma-associated antigen	2	C:intracellular; P:RNA processing	-
CPIJ005045			0.0062117	0.00651446	0.0274209	0.237572	393	71.0271	321.973	4	2	1.92591	2.07409	conserved hypothetical protein	0	-
CPIJ011919			0.00620875	0.00665499	0.1124	0.059208	783	138.748	644.252	19	4	14.9029	4.09713	conserved hypothetical protein	2	F:methyltransferase activity; P:methylation	EC:2.1.1.0	PF01728	FtsJ-like methyltransferase
CPIJ003554			0.00620113	0.00752282	0.0438851	0.171421	204	42.7392	161.261	3	1	1.82172	1.17828	aael006128- partial	2	F:nucleic acid binding; F:nucleotide binding		PF09773	Meckelin (Transmembrane protein 67)
CPIJ013291			0.00619988	0.00588035	0.0318292	0.184747	426	103.413	322.587	5	2	3.17198	1.82802	fibrinogen and fibronectin	2	P:signal transduction; F:receptor binding	-	PF00147	Fibrinogen beta and gamma chains, C-terminal globular domain
CPIJ009814			0.00619862	0.00923024	0.0621263	0.148572	735	89.6948	645.305	11	4	5.31685	5.68315	aael007476- partial	3	F:zinc ion binding; F:nucleic acid binding; F:metal ion binding	-	PF13639	Ring finger domain
CPIJ003620			0.00619758	0.00616705	0.000124264	49.6288	603	118.94	484.06	3	3	0.0147799	2.98522	serine protease	2	F:serine-type endopeptidase activity; P:proteolysis	EC:3.4.21.0	PF00089	Trypsin
CPIJ013795			0.0061954	0.00906447	0.0626753	0.144626	411	88.1797	322.82	8	2	5.23058	2.76942	cuticle protein	3	F:structural constituent of cuticle; F:catalytic activity; P:metabolic process	-	PF00379	Insect cuticle protein
CPIJ017401			0.00619364	0.0059073	0.063346	0.0932544	213	51.5437	161.456	4	1	3.09571	0.904292	endonuclease-reverse transcriptase	4	F:RNA binding; P:RNA-dependent DNA replication; F:endonuclease activity; F:RNA-directed DNA polymerase activity
CPIJ013306			0.00618419	0.00791363	0.0587338	0.134737	837	190.189	646.811	16	4	10.9722	5.02776	conserved hypothetical protein	2	P:cell communication; F:phosphatidylinositol binding	-	PF00787	PX domain
CPIJ018749			0.0061819	0.00599105	0.0601683	0.0995716	450	126.475	323.525	9	2	7.173	1.827	hypothetical protein CpipJ_CPIJ018749	0	-
CPIJ004639			0.00618179	0.00573992	0.0825989	0.0694914	468	144.469	323.531	13	2	11.2493	1.75065	trypsin 5g1	2	F:serine-type endopeptidase activity; P:proteolysis	EC:3.4.21.0	PF00089	Trypsin
CPIJ011227			0.00618156	0.00628699	0.00809457	0.776692	888	240.914	647.086	6	4	1.94416	4.05584	zinc finger protein gfi-1	3	F:nucleic acid binding; C:nucleus; F:zinc ion binding	-	PF00096	Zinc finger, C2H2 type
CPIJ007445			0.00617936	0.00627372	0.000125474	50	204	42.1712	161.829	1	1	0.00518481	0.994815	hypothetical protein CpipJ_CPIJ007445	0	-
CPIJ016384			0.00617904	0.00923795	0.103597	0.0891723	552	66.4884	485.512	11	3	6.66201	4.33799	conserved hypothetical protein	0	-
CPIJ001399			0.00617246	0.00611387	0.126453	0.0483488	213	50.9899	162.01	7	1	6.06786	0.932137	replication factor c subunit 4	4	P:DNA replication; F:DNA binding; F:ATP binding; F:nucleoside-triphosphatase activity	EC:3.6.1.15	PF08542	Replication factor C C-terminal domain
CPIJ017214			0.00617231	0.00617144	0.10038	0.0614807	951	140.93	810.07	18	5	13.2999	4.7001	mesoderm induction early response protein 1	3	C:nucleus; F:DNA binding; F:chromatin binding	-	PF01448	ELM2 domain
CPIJ801572			0.00616976	0.00553361	0.124262	0.044532	798	149.677	648.323	21	4	17.6043	3.3957	trypsin 1	2	F:serine-type endopeptidase activity; P:proteolysis	EC:3.4.21.0	PF00089	Trypsin
CPIJ015586			0.00616918	0.00672795	0.221106	0.0304286	537	50.7121	486.288	13	3	10.0636	2.93641	conserved hypothetical protein	0	-
CPIJ018967			0.00616452	0.00606356	0.00855333	0.708913	618	131.344	486.656	4	3	1.10294	2.89706	downstream of kinase	2	F:phospholipid binding; F:insulin receptor binding
CPIJ004527			0.00615788	0.00617195	0.0394775	0.156341	402	77.213	324.787	5	2	3.01636	1.98364	aminopeptidase n	3	F:metallopeptidase activity; F:2 iron, 2 sulfur cluster binding; C:intracellular membrane-bounded organelle	-	PF09360	Iron-binding zinc finger CDGSH type
CPIJ802478			0.00615786	0.00638487	0.153487	0.0415987	591	103.818	487.182	18	3	15.0601	2.93985	leucine rich protein	0	-		PF13855	Leucine rich repeat
CPIJ016925			0.00615707	0.00640068	0.08326	0.0768758	2850	576.192	2273.81	60	14	46.0344	13.9656	conserved hypothetical protein	3	P:RNA methylation; F:RNA methyltransferase activity; F:O-methyltransferase activity
CPIJ009249			0.00615289	0.00787062	0.0484322	0.162508	1209	233.848	975.152	19	6	11.3253	7.67472	trna methyltransferase	3	P:methylation; F:methyltransferase activity; C:mitochondrion	EC:2.1.1.0	PF02475	Met-10+ like-protein
CPIJ013111			0.00615167	0.00718417	0.103862	0.0691705	396	70.8853	325.115	9	2	6.83241	2.16759	serpin b8	3	F:serine-type endopeptidase inhibitor activity; P:proteolysis; F:peptidase activity	-	PF00079	Serpin (serine protease inhibitor)
CPIJ010896			0.00614976	0.00882711	0.0631955	0.139679	396	70.7839	325.216	7	2	4.26373	2.73627	anopheles gambiae pest agap012902-pa	0	-
CPIJ012672			0.0061455	0.00579156	0.113843	0.0508734	2634	518.626	2115.37	67	13	55.4864	11.5136	vacuolar protein sorting-associated protein	1	P:protein localization		PF09333	ATG C terminal domain
CPIJ010072			0.00614361	0.00618768	0.0541618	0.114244	846	194.917	651.083	14	4	10.1331	3.86691	transmembrane protease	3	C:integral to membrane; P:proteolysis; F:serine-type endopeptidase activity	EC:3.4.21.0	PF00089	Trypsin
CPIJ010404			0.00614021	0.00752234	0.0663757	0.11333	396	70.2777	325.722	7	2	4.58938	2.41062	hypothetical conserved protein	0	-		PF05250	Uncharacterised protein family (UPF0193)
CPIJ015640			0.00613768	0.0103658	0.0723113	0.14335	603	114.216	488.784	13	3	8.05723	4.94277	anopheles gambiae pest agap012916-pa	3	C:extracellular space; P:signal transduction; F:receptor binding	-	PF00147	Fibrinogen beta and gamma chains, C-terminal globular domain
CPIJ000321			0.00613727	0.00660364	0.0496541	0.132993	1947	317.612	1629.39	26	10	15.4553	10.5447	conserved hypothetical protein	0	-
CPIJ016064			0.00613027	0.00614746	0.000122949	50	210	46.875	163.125	1	1	0.00571429	0.994286	26s protease regulatory subunit 6a	2	F:peptidase activity; P:proteolysis	-
CPIJ003855			0.00612979	0.0083617	0.0813423	0.102797	603	113.587	489.413	13	3	9.00949	3.99051	conserved hypothetical protein	2	F:zinc ion binding; C:intracellular	-	PF00643	B-box zinc finger
CPIJ008393			0.00612155	0.0063092	0.051962	0.12142	3288	837.644	2450.36	57	15	42.0606	14.9394	conserved hypothetical protein	1	F:DNA binding	-
CPIJ020224			0.00611809	0.00585707	0.107992	0.0542363	768	114.201	653.799	15	4	11.446	3.554	telomere-associated protein rif1	2	P:lipid transport; F:lipid transporter activity
CPIJ000234			0.00611664	0.00644428	0.0488018	0.13205	594	103.535	490.465	8	3	4.92141	3.07859	conserved hypothetical protein	0	-
CPIJ802425			0.00611049	0.00692936	0.110688	0.0626028	2091	454.472	1636.53	59	10	48.1464	10.8536	dipeptidyl peptidase 4	3	F:serine-type peptidase activity; C:membrane; P:proteolysis	-	PF00326	Prolyl oligopeptidase family
CPIJ001515			0.00610479	0.00637286	0.0547812	0.116333	1428	281.36	1146.64	22	7	14.9244	7.07561	zinc finger protein 467	2	C:nucleus; F:zinc ion binding	-	PF07776	Zinc-finger associated domain (zf-AD)
CPIJ016699			0.00610264	0.00679331	0.0920014	0.0738392	1041	221.682	819.318	25	5	19.6401	5.35986	serine protease serpin	3	F:serine-type endopeptidase inhibitor activity; P:proteolysis; F:peptidase activity	-	PF00079	Serpin (serine protease inhibitor)
CPIJ000393			0.00610263	0.00689306	0.0561975	0.122658	1722	411.094	1310.91	32	8	23.0028	8.99719	vitamin k-dependent protein c	2	F:serine-type endopeptidase activity; P:proteolysis	EC:3.4.21.0	PF12032	Regulatory CLIP domain of proteinases
CPIJ009667			0.00609905	0.00613862	0.124801	0.0491872	2496	528.48	1967.52	72	12	60.8559	11.1441	conserved hypothetical protein	0	-
CPIJ006093			0.00609615	0.00693905	0.11518	0.0602454	219	54.9616	164.038	7	1	5.93317	1.06683	cytochrome c subunit viia	3	F:electron carrier activity; F:cytochrome-c oxidase activity; C:mitochondrial respiratory chain	EC:1.9.3.1	PF02238	Cytochrome c oxidase subunit VIIa
CPIJ012133			0.00609444	0.00813721	0.0699948	0.116254	429	100.832	328.168	9	2	6.52948	2.47052	conserved hypothetical protein	0	-
CPIJ003695			0.0060874	0.00634598	0.102373	0.0619891	834	176.905	657.095	20	4	16.2568	3.74317	glucosyl glucuronosyl transferase	2	F:transferase activity, transferring hexosyl groups; P:metabolic process	EC:2.4.1.0	PF00201	UDP-glucoronosyl and UDP-glucosyl transferase
CPIJ011812			0.00608075	0.00584973	0.11432	0.05117	393	64.093	328.907	8	2	6.33618	1.66382	conserved hypothetical protein	0	-		PF12937	F-box-like
CPIJ003387			0.00607932	0.00556728	0.0431977	0.128879	678	184.524	493.476	10	3	7.4368	2.5632	zinc finger protein 394	3	F:nucleic acid binding; C:nucleus; F:zinc ion binding	-	PF00096	Zinc finger, C2H2 type
CPIJ017543			0.00607844	0.0078433	0.068055	0.115249	1257	269.905	987.095	25	6	17.5872	7.41282	cuticular protein rr-2 motif 132	1	F:structural constituent of cuticle	-	PF00379	Insect cuticle protein
CPIJ004548			0.00607782	0.00622157	0.149088	0.0417308	627	133.402	493.598	21	3	18.1912	2.80884	mitochondrial carrier protein	2	P:transmembrane transport; C:integral to membrane	-	PF00153	Mitochondrial carrier protein
CPIJ801982			0.00607707	0.00575111	0.0597048	0.0963259	201	36.4468	164.553	3	1	2.09074	0.909263	chemosensory protein 1	2	F:kinase activity; P:phosphorylation	-	PF03392	Insect pheromone-binding family, A10/OS-D
CPIJ010279			0.00607609	0.00502914	0.118843	0.0423177	447	117.841	329.159	13	2	11.6258	1.37421	conserved hypothetical protein	4	F:binding; F:cysteine-type peptidase activity; P:protein metabolic process; F:kinase activity	-
CPIJ009032			0.00607345	0.00681187	0.0947508	0.0718924	2028	381.486	1646.51	44	10	33.5803	10.4197	hexamerin 2 beta	0	-		PF00372	Hemocyanin, copper containing domain
CPIJ016940			0.0060701	0.00690376	0.189215	0.0364863	603	108.774	494.226	22	3	18.8715	3.12851	conserved hypothetical protein	0	-
CPIJ014045			0.00607009	0.00603705	0.057987	0.10411	603	108.773	494.227	9	3	6.10981	2.89019	39s ribosomal protein mitochondrial	1	C:ribosome	-
CPIJ005691			0.00606831	0.00646295	0.126221	0.0512032	1047	223.048	823.952	31	5	26.0691	4.9309	2-amino-3-ketobutyrate coenzyme a ligase	3	F:pyridoxal phosphate binding; F:glycine C-acetyltransferase activity; P:biosynthetic process	EC:2.3.1.29	PF00155	Aminotransferase class I and II
CPIJ002745			0.00606618	0.0057851	0.0582477	0.0993189	438	108.303	329.697	8	2	6.14276	1.85724	niemann-pick type c-	0	-		PF02221	ML domain
CPIJ801594			0.00606566	0.00644929	0.0363971	0.177193	1008	183.687	824.313	12	5	6.68461	5.31539	ttc19 protein	0	-		PF13424	Tetratricopeptide repeat
CPIJ000867			0.00606458	0.00612975	0.0559221	0.109612	204	39.1085	164.892	3	1	2.05177	0.948233	aael000103- partial	0	-		PF07686	Immunoglobulin V-set domain
CPIJ006497			0.00606286	0.00642652	0.0107913	0.59553	576	81.1844	494.816	4	3	0.863982	3.13602	goliath e3 ubiquitin ligase	2	F:zinc ion binding; F:metal ion binding	-	PF13639	Ring finger domain
CPIJ000817			0.00606031	0.00573117	0.101114	0.0566802	411	80.9838	330.016	9	2	7.31127	1.68873	conserved hypothetical protein	0	-
CPIJ801963			0.00605735	0.0068999	0.060081	0.114843	1731	410.295	1320.71	32	8	23.3633	8.63673	conserved hypothetical protein	0	-
CPIJ018976			0.00605568	0.00669576	0.0315974	0.211908	582	86.5975	495.403	6	3	2.71214	3.28786	1-acylglycerol-3-phosphate acyltransferase	2	P:metabolic process; F:transferase activity, transferring acyl groups	-
CPIJ006007			0.00605265	0.00628888	0.0484373	0.129836	522	191.566	330.434	11	2	8.98726	2.01274	possible mucin	0	-		PF05283	Multi-glycosylated core protein 24 (MGC-24)
CPIJ004789			0.00605189	0.00655221	0.101889	0.0643076	588	92.2869	495.713	12	3	8.91912	3.08088	thyroid hormone receptor-associated protein 6	1	P:transcription, DNA-dependent	-	PF11315	Mediator complex subunit 30
CPIJ006453			0.00604588	0.00773365	0.109689	0.0705055	1047	219.99	827.01	29	5	22.924	6.07604	zinc binding dehydrogenase	4	F:zinc ion binding; F:oxidoreductase activity; P:oxidation-reduction process; F:nucleotide binding	-	PF08240	Alcohol dehydrogenase GroES-like domain
CPIJ006543			0.00603531	0.00654814	0.0790513	0.0828341	435	103.617	331.383	10	2	7.90567	2.09433	urokinase-type plasminogen activator	4	F:kinase activity; P:phosphorylation; P:proteolysis; F:serine-type endopeptidase activity	EC:3.4.21.0	PF00089	Trypsin
CPIJ800237			0.0060346	0.0104941	0.0643236	0.163145	411	79.578	331.422	8	2	4.76344	3.23656	cytochrome p450 9b1	6	F:heme binding; F:oxidoreductase activity, acting on paired donors, with incorporation or reduction of molecular oxygen; F:monooxygenase activity; F:iron ion binding; F:electron carrier activity; P:oxidation-reduction process	-	PF00067	Cytochrome P450
CPIJ012163			0.00603427	0.00696143	0.0170346	0.408664	435	103.56	331.44	4	2	1.73317	2.26683	conserved hypothetical protein	0	-		PF06585	Haemolymph juvenile hormone binding protein (JHBP)
CPIJ000280			0.00603395	0.00464088	0.101325	0.0458018	198	32.2712	165.729	4	1	3.2383	0.761697	conserved hypothetical protein	0	-		PF08312	cwf21 domain
CPIJ017847			0.00603003	0.00593191	0.0943489	0.0628721	588	90.4899	497.51	11	3	8.17438	2.82562	conserved hypothetical protein	0	-
CPIJ000225			0.0060296	0.00699044	0.130562	0.053541	1461	300.061	1160.94	44	7	36.4495	7.55054	glucosyl glucuronosyl transferases	2	F:transferase activity, transferring hexosyl groups; P:metabolic process	EC:2.4.1.0	PF00201	UDP-glucoronosyl and UDP-glucosyl transferase
CPIJ001667			0.00602747	0.00801284	0.0756904	0.105863	1422	260.651	1161.35	28	7	19.0259	8.97414	conserved hypothetical protein	1	F:selenium binding	-	PF04592	Selenoprotein P, N terminal region
CPIJ014344			0.0060263	0.00620444	0.132709	0.0467522	627	129.182	497.818	18	3	15.2521	2.74789	conserved hypothetical protein	3	C:integral to membrane; P:proteolysis; F:serine-type endopeptidase activity	EC:3.4.21.0	PF01694	Rhomboid family
CPIJ003705			0.0060217	0.00618575	0.07736	0.0799606	2211	550.341	1660.66	49	10	39.4753	9.52468	conserved hypothetical protein	0	-
CPIJ000457			0.00602127	0.00605551	0.0465864	0.129984	231	64.9218	166.078	4	1	3.00184	0.99816	hypothetical conserved protein	2	C:integral to endoplasmic reticulum membrane; P:macromolecule biosynthetic process	-	PF07297	Dolichol phosphate-mannose biosynthesis regulatory protein (DPM2)
CPIJ000214			0.00601786	0.00682566	0.0594629	0.114789	618	119.484	498.516	10	3	6.76167	3.23833	serpin b10	1	F:serine-type endopeptidase inhibitor activity	-	PF00079	Serpin (serine protease inhibitor)
CPIJ016782			0.00601563	0.00645821	0.249482	0.0258865	576	77.2992	498.701	19	3	16.2809	2.71906	myo-inositol-1 phosphate synthase	7	P:inositol biosynthetic process; F:inositol-3-phosphate synthase activity; P:ribosome biogenesis; F:nucleotide binding; F:snoRNA binding; P:snRNA pseudouridine synthesis; P:phospholipid biosynthetic process	EC:5.5.1.4	PF07994	Myo-inositol-1-phosphate synthase
CPIJ001718			0.00601513	0.00610094	0.126925	0.0480674	630	131.258	498.742	19	3	16.0657	2.93427	conserved hypothetical protein	0	-
CPIJ012172			0.00601498	0.0101839	0.0783289	0.130015	639	140.245	498.755	15	3	10.2573	4.74271	conserved hypothetical protein	0	-		PF00622	SPRY domain
CPIJ004570			0.00601283	0.00591676	0.102675	0.057626	816	150.756	665.244	18	4	14.3508	3.64921	conserved hypothetical protein	0	-
CPIJ010696			0.00601261	0.00623722	0.0224839	0.277408	423	90.366	332.634	4	2	1.97909	2.02091	conserved hypothetical protein	0	-
CPIJ016719			0.00601218	0.00678541	0.0753733	0.0900241	447	114.342	332.658	10	2	7.9245	2.0755	alcohol dehydrogenase 2	3	F:alcohol dehydrogenase (NAD) activity; P:oxidation-reduction process; F:nucleotide binding	EC:1.1.1.1	PF00106	short chain dehydrogenase
CPIJ009352			0.00600903	0.00782668	0.0728851	0.107384	1719	387.672	1331.33	37	8	27.0315	9.96851	conserved hypothetical protein	1	F:zinc ion binding	-	PF13414	TPR repeat
CPIJ007351			0.00600868	0.00594924	0.124137	0.047925	804	138.296	665.704	20	4	16.251	3.74898	terminal deoxycytidyl transferase rev1	4	F:DNA-directed DNA polymerase activity; F:damaged DNA binding; F:magnesium ion binding; P:DNA repair	EC:2.7.7.7	PF14377	Domain of unknown function (DUF4414)
CPIJ016933			0.00600622	0.0063774	0.170029	0.0375077	609	109.518	499.482	20	3	17.0785	2.9215	conserved hypothetical protein	0	-		PF00400	WD domain, G-beta repeat
CPIJ017510			0.00600163	0.00678605	0.196574	0.0345217	414	80.7569	333.243	16	2	14.0049	1.99505	leucine rich protein	0	-		PF12799	Leucine Rich repeats (2 copies)
CPIJ015776			0.00599833	0.00680141	0.107668	0.0631705	774	107.148	666.852	16	4	11.4847	4.51526	otu domain-containing protein 6b	0	-		PF02338	OTU-like cysteine protease
CPIJ005176			0.00599631	0.00609926	0.0475093	0.12838	609	108.692	500.308	8	3	5.0285	2.9715	G12	0	-		PF06757	Insect allergen related repeat, nitrile-specifier detoxification
CPIJ002645			0.00599454	0.00593516	0.116514	0.0509393	2358	356.182	2001.82	51	12	39.6489	11.3511	conserved hypothetical protein	2	F:zinc ion binding; F:metal ion binding	-	PF00567	Tudor domain
CPIJ015743			0.00599249	0.00628433	0.133356	0.0471244	636	135.373	500.627	19	3	16.1802	2.81977	conserved hypothetical protein	1	F:carbohydrate binding
CPIJ017307			0.00598761	0.0050496	0.0694136	0.0727465	627	125.965	501.035	11	3	8.53141	2.46859	24 kda salivary protein	0	-
CPIJ015026			0.00598406	0.00610883	0.0824472	0.0740938	756	87.5569	668.443	11	4	7.02579	3.97421	venom allergen 5	0	-		PF00188	Cysteine-rich secretory protein family
CPIJ010332			0.00598187	0.00596465	0.109601	0.0544217	837	168.313	668.687	21	4	17.2667	3.73325	nadph oxidase	3	F:oxidoreductase activity; P:oxidation-reduction process; C:integral to membrane	-	PF08022	FAD-binding domain
CPIJ014386			0.005976	0.00612946	0.105753	0.0579599	633	130.992	502.008	16	3	13.092	2.90802	conserved hypothetical protein	0	-		PF13270	Domain of unknown function (DUF4061)
CPIJ016298			0.00597589	0.0065956	0.140048	0.0470954	414	79.322	334.678	12	2	10.0108	1.98921	plasminogen activator inhibitor 1	1	F:serine-type endopeptidase inhibitor activity	-	PF00079	Serpin (serine protease inhibitor)
CPIJ018405			0.0059745	0.00569784	0.270057	0.0210986	189	21.6217	167.378	5	1	4.29801	0.701991	conserved hypothetical protein	2	F:hydrolase activity; P:lipid metabolic process	-
CPIJ004549			0.00596828	0.00640405	0.138795	0.0461402	657	154.343	502.657	22	3	19.126	2.87402	conserved hypothetical protein	2	F:cysteamine dioxygenase activity; P:oxidation-reduction process	EC:1.13.11.19	PF07847	Protein of unknown function (DUF1637)
CPIJ006350			0.00596753	0.00658199	0.0466823	0.140995	903	232.706	670.294	15	4	10.6676	4.33241	cortactin	0	-		PF00018	SH3 domain
CPIJ800200			0.00596161	0.00741924	0.109501	0.0677552	1497	322.821	1174.18	41	7	32.8936	8.10639	cytochrome p450 family protein 44a1	6	F:heme binding; F:oxidoreductase activity, acting on paired donors, with incorporation or reduction of molecular oxygen; F:monooxygenase activity; F:iron ion binding; F:electron carrier activity; P:oxidation-reduction process	-	PF00067	Cytochrome P450
CPIJ013918			0.00595642	0.00616488	0.129231	0.0477044	633	129.342	503.658	18	3	15.1801	2.81988	esterase b1	1	F:hydrolase activity	-	PF00135	Carboxylesterase family
CPIJ801762			0.00595284	0.00615091	0.0448966	0.137002	1500	324.093	1175.91	21	7	14.0273	6.97272	isoform a	0	-
CPIJ000970			0.00595157	0.0075207	0.0846123	0.0888842	1485	308.839	1176.16	33	7	24.6545	8.34555	conserved hypothetical protein	0	-
CPIJ006799			0.00595147	0.00613332	0.0138751	0.442039	1620	443.825	1176.18	13	7	5.98681	7.01319	conserved hypothetical protein	0	-
CPIJ802260			0.00594988	0.00615791	0.147242	0.0418217	609	104.788	504.212	17	3	14.1521	2.84791	atp synthase mitochondrial f1 complex assembly factor 2	1	P:proton-transporting ATP synthase complex assembly	-	PF07542	ATP12 chaperone protein
CPIJ002932			0.00594941	0.00646632	0.0121241	0.533343	816	143.664	672.336	6	4	1.71624	4.28376	conserved hypothetical protein	2	F:zinc ion binding; C:intracellular	-
CPIJ800202			0.00594725	0.00633065	0.0195273	0.324194	1143	302.275	840.725	11	5	5.78433	5.21567	cytochrome p450 6a1	6	F:heme binding; F:oxidoreductase activity, acting on paired donors, with incorporation or reduction of molecular oxygen; F:monooxygenase activity; F:iron ion binding; F:electron carrier activity; P:oxidation-reduction process	-	PF00067	Cytochrome P450
CPIJ008543			0.00594118	0.00652381	0.0476057	0.137039	1260	250.099	1009.9	18	6	11.5878	6.41223	zinc finger protein 271-like	3	F:nucleic acid binding; C:intracellular; F:zinc ion binding	-	PF13465	Zinc-finger double domain
CPIJ006224			0.00593202	0.00690207	0.117294	0.0588444	1221	209.537	1011.46	29	6	22.5848	6.41522	conserved hypothetical protein	3	F:nucleic acid binding; C:nucleus; F:zinc ion binding	-	PF13894	C2H2-type zinc finger
CPIJ007604			0.00593185	0.00665111	0.0261824	0.25403	447	109.837	337.163	5	2	2.80933	2.19067	odorant-binding protein 1 precursor	2	F:odorant binding; C:extracellular space	-	PF01395	PBP/GOBP family
CPIJ016492			0.00592723	0.00628821	0.126646	0.049652	213	44.2871	168.713	6	1	5.04562	0.95438	long-chain-fatty-acid- ligase 1	3	F:ligase activity; P:metabolic process; F:monooxygenase activity	-	PF13193	Domain of unknown function (DUF4009)
CPIJ801746			0.00592716	0.00668254	0.116698	0.0572634	1245	232.713	1012.29	32	6	25.6186	6.3814	anopheles gambiae pest agap012635-pa	0	-		PF13855	Leucine rich repeat
CPIJ006383			0.00592298	0.00581643	0.0441775	0.13166	453	115.332	337.668	7	2	5.05242	1.94758	conserved hypothetical protein	0	-		PF12937	F-box-like
CPIJ017747			0.00592154	0.00592907	0.0647763	0.0915314	846	170.5	675.5	14	4	10.2742	3.72581	cytochrome c oxidase assembly protein cox15	4	P:heme a biosynthetic process; F:oxidoreductase activity, acting on the CH-CH group of donors; C:membrane; P:oxidation-reduction process	-	PF02628	Cytochrome oxidase assembly protein
CPIJ013680			0.00592107	0.00667112	0.0420582	0.158616	2748	552.446	2195.55	37	13	22.6941	14.3059	zinc finger protein 283	3	F:nucleic acid binding; C:intracellular; F:zinc ion binding	-	PF13465	Zinc-finger double domain
CPIJ006617			0.00591534	0.00602931	0.0512465	0.117653	438	99.8956	338.104	7	2	5.00642	1.99358	anopheles gambiae pest agap012644-pa	1	C:integral to membrane	-	PF03188	Eukaryotic cytochrome b561
CPIJ018757			0.0059153	0.00648095	0.0774756	0.0836515	210	40.9471	169.053	4	1	2.97318	1.02682	gh regulated tbc protein-1	3	F:Rab GTPase activator activity; C:intracellular; P:positive regulation of Rab GTPase activity	-	PF00566	Rab-GTPase-TBC domain
CPIJ002829			0.0059152	0.00600397	0.054437	0.110292	2067	376.444	1690.56	30	10	20.0628	9.93722	arsenite-resistance protein	3	P:primary miRNA processing; F:protein binding; C:nucleoplasm	-	PF04959	Arsenite-resistance protein 2
CPIJ011957			0.00591423	0.00594808	0.223731	0.0265859	786	109.665	676.335	25	4	21.4783	3.52165	conserved hypothetical protein	0	-		PF08190	pre-RNA processing PIH1/Nop17
CPIJ013929			0.00591389	0.00624057	0.0225503	0.276741	1269	254.445	1014.56	12	6	5.7049	6.2951	conserved hypothetical protein	4	C:integral to membrane; P:response to stress; P:G-protein coupled receptor signaling pathway; F:G-protein coupled receptor activity	-	PF00002	7 transmembrane receptor (Secretin family)
CPIJ015385			0.00591315	0.00591164	0.077787	0.0759978	1098	252.427	845.573	23	5	18.3329	4.6671	hepatic triacylglycerol lipase	3	C:extracellular region; F:hydrolase activity; P:lipid metabolic process	-	PF00151	Lipase
CPIJ007365			0.00591279	0.00569014	0.0641149	0.088749	681	173.625	507.375	13	3	10.3228	2.67719	conserved hypothetical protein	1	C:DNA-directed RNA polymerase II, holoenzyme	-
CPIJ012679			0.00590958	0.00694615	0.0699618	0.0992849	1965	442.048	1522.95	40	9	29.805	10.195	adam metalloprotease	3	F:metalloendopeptidase activity; P:proteolysis; F:zinc ion binding	EC:3.4.24.0	PF01562	Reprolysin family propeptide
CPIJ801766			0.005909	0.00626232	0.090568	0.069145	396	57.5327	338.467	7	2	4.97589	2.02411	conserved hypothetical protein	0	-
CPIJ014572			0.00590866	0.00594666	0.000118933	50	219	49.7571	169.243	1	1	0.0058456	0.994154	conserved hypothetical protein	2	F:nucleic acid binding; F:nucleotide binding	-	PF00076	RNA recognition motif. (a.k.a. RRM, RBD, or RNP domain)
CPIJ802275			0.00590834	0.00581997	0.0173787	0.33489	810	132.991	677.009	6	4	2.21828	3.78172	hypothetical protein CpipJ_CPIJ015882	2	F:nucleic acid binding; F:nucleotide binding	-	PF00076	RNA recognition motif. (a.k.a. RRM, RBD, or RNP domain)
CPIJ019883			0.00590766	0.00656591	0.0438405	0.149768	660	152.185	507.815	10	3	6.66777	3.33223	chymotrypsinogen 2	3	C:integral to membrane; P:proteolysis; F:serine-type endopeptidase activity	EC:3.4.21.0	PF00089	Trypsin
CPIJ009487			0.00590449	0.00600386	0.130461	0.0460202	627	118.912	508.088	17	3	14.2065	2.79351	conserved hypothetical protein	0	-
CPIJ009934			0.00590403	0.00593388	0.0723278	0.0820416	4236	1017.86	3218.14	88	19	69.8751	18.1249	conserved hypothetical protein	0	-
CPIJ010762			0.00589379	0.00638291	0.094021	0.0678882	1347	328.982	1018.02	35	6	28.9238	6.07622	glucosyl glucuronosyl transferase	2	F:transferase activity, transferring hexosyl groups; P:metabolic process	EC:2.4.1.0	PF00201	UDP-glucoronosyl and UDP-glucosyl transferase
CPIJ014496			0.00589369	0.0062034	0.0822861	0.0753882	1107	258.635	848.365	25	5	20.0435	4.95648	transient receptor potential cation channel protein painless	6	C:integral to membrane; C:membrane; P:transmembrane transport; P:ion transport; F:ion channel activity; P:transport
CPIJ016222			0.00589122	0.0063556	0.019978	0.31813	1086	237.279	848.721	10	5	4.67746	5.32254	serine protease	2	F:serine-type endopeptidase activity; P:proteolysis	EC:3.4.21.0	PF00089	Trypsin
CPIJ800182			0.00588885	0.00627905	0.255689	0.0245574	408	68.3751	339.625	16	2	14.2605	1.73948	cytochrome p450	6	F:heme binding; F:oxidoreductase activity, acting on paired donors, with incorporation or reduction of molecular oxygen; F:monooxygenase activity; F:iron ion binding; F:electron carrier activity; P:oxidation-reduction process	-	PF00067	Cytochrome P450
CPIJ014406			0.00588869	0.00546515	0.028152	0.19413	279	109.183	169.817	4	1	3.07234	0.927658	hypothetical protein CpipJ_CPIJ014406	0	-
CPIJ013919			0.00588787	0.00760267	0.0713424	0.106566	3075	697.234	2377.77	65	14	47.6742	17.3258	xanthine dehydrogenase oxidase	6	F:flavin adenine dinucleotide binding; F:oxidoreductase activity, acting on CH-OH group of donors; F:iron ion binding; F:electron carrier activity; F:2 iron, 2 sulfur cluster binding; P:oxidation-reduction process	-	PF01315	Aldehyde oxidase and xanthine dehydrogenase, a/b hammerhead domain
CPIJ802076			0.00588769	0.00658284	0.0253463	0.259716	654	144.462	509.538	7	3	3.65334	3.34666	conserved hypothetical protein	0	-
CPIJ015799			0.00588498	0.00744666	0.065252	0.114122	1047	197.379	849.621	18	5	12.0705	5.92949	chromatin assembly factor-1 p180 subunit	0	-		PF12253	Chromatin assembly factor 1 subunit A
CPIJ016220			0.00588401	0.00594554	0.049907	0.119132	1080	230.239	849.761	16	5	11.1135	4.8865	serine protease	2	F:serine-type endopeptidase activity; P:proteolysis	EC:3.4.21.0	PF12032	Regulatory CLIP domain of proteinases
CPIJ010804			0.0058831	0.00598709	0.0367734	0.16281	1269	249.134	1019.87	15	6	9.00097	5.99903	zinc carboxypeptidase	3	P:proteolysis; F:metallocarboxypeptidase activity; F:zinc ion binding	EC:3.4.17.0	PF02244	Carboxypeptidase activation peptide
CPIJ013769			0.00588159	0.00801582	0.342808	0.0233828	189	18.9784	170.022	7	1	5.78761	1.21239	pupal cuticle protein	1	F:structural constituent of cuticle	-	PF00379	Insect cuticle protein
CPIJ002321			0.00587899	0.007176	0.0462202	0.155257	2427	555.929	1871.07	37	11	24.3015	12.6985	conserved hypothetical protein	0	-		PF13771	PHD-like zinc-binding domain
CPIJ009786			0.00587815	0.0060348	0.0713529	0.0845769	1503	312.145	1190.85	28	7	21.1694	6.83064	zinc finger protein	3	F:zinc ion binding; F:nucleic acid binding; C:intracellular	-	PF13894	C2H2-type zinc finger
CPIJ802498			0.00587515	0.00712137	0.088113	0.0808209	915	234.166	680.834	24	4	19.4334	4.56658	pray for	0	-		PF13855	Leucine rich repeat
CPIJ017724			0.00587126	0.00664309	0.0608482	0.109175	1602	239.425	1362.57	23	8	14.186	8.81399	conserved hypothetical protein	6	P:protein folding; F:unfolded protein binding; C:nucleus; F:DNA binding; F:heat shock protein binding; F:chromatin binding	-	PF00249	Myb-like DNA-binding domain
CPIJ001700			0.00587083	0.00565301	0.123983	0.0455948	1692	329.328	1362.67	45	8	37.8578	7.14222	matrix metalloproteinase	5	F:metalloendopeptidase activity; C:extracellular matrix; F:calcium ion binding; P:proteolysis; F:zinc ion binding	EC:3.4.24.0	PF00045	Hemopexin
CPIJ000852			0.00586745	0.00788233	0.0237546	0.331823	1293	270.415	1022.59	14	6	6.20896	7.79104	myosin heavy chain	4	F:actin binding; C:myosin complex; F:ATP binding; F:motor activity	-	PF00063	Myosin head (motor domain)
CPIJ002289			0.00586514	0.00674981	0.0325534	0.207346	687	175.503	511.497	9	3	5.60992	3.39008	deoxyribonuclease i	3	F:hydrolase activity; F:nucleic acid binding; F:metal ion binding	-	PF01223	DNA/RNA non-specific endonuclease
CPIJ008960			0.00586252	0.00731418	0.106162	0.0688966	411	69.8504	341.15	9	2	6.73405	2.26595	pop5 protein	3	F:ribonuclease P activity; C:nucleus; P:tRNA processing	EC:3.1.26.5	PF01900	Rpp14/Pop5 family
CPIJ014731			0.00585014	0.00582909	0.000116582	50	213	42.0639	170.936	1	1	0.00489749	0.995103	hypothetical protein CpipJ_CPIJ014731	0	-
CPIJ016920			0.00584705	0.00598954	0.159732	0.0374973	438	95.9474	342.053	16	2	14.1134	1.88665	nadp-dependent l-serine l-allo-threonine dehydrogenase ydfg	3	P:oxidation-reduction process; F:nucleotide binding; F:farnesol dehydrogenase activity	EC:1.1.1.216	PF00106	short chain dehydrogenase
CPIJ012914			0.00584547	0.00624185	0.0787973	0.079214	3336	769.913	2566.09	73	15	57.7524	15.2476	cyclin t	3	P:regulation of transcription, DNA-dependent; F:protein kinase binding; P:regulation of cyclin-dependent protein kinase activity	-	PF00134	Cyclin, N-terminal domain
CPIJ014322			0.00584273	0.00630202	0.00012604	50	273	101.847	171.153	1	1	0.0117613	0.988239	hypothetical protein CpipJ_CPIJ014322	0	-
CPIJ007370			0.00583908	0.0067423	0.106637	0.0632267	885	199.961	685.039	25	4	20.549	4.45102	aldo-keto reductase	2	P:oxidation-reduction process; F:oxidoreductase activity	-	PF00248	Aldo/keto reductase family
CPIJ013891			0.00583902	0.00668512	0.0135703	0.492628	480	137.477	342.523	4	2	1.79584	2.20416	thap4 protein	0	-		PF08768	Domain of unknown function (DUF1794)
CPIJ010656			0.0058366	0.00586057	0.130494	0.0449106	1794	423.336	1370.66	58	8	50.6369	7.36313	atp-binding cassette sub-family b member mitochondrial	5	P:transmembrane transport; C:integral to membrane; F:ATPase activity, coupled to transmembrane movement of substances; P:ATP catabolic process; F:ATP binding	-	PF00664	ABC transporter transmembrane region
CPIJ801633			0.00583609	0.00639364	0.0758675	0.0842738	1560	189.219	1370.78	22	8	13.6602	8.33978	stromal interaction	0	-		PF07647	SAM domain (Sterile alpha motif)
CPIJ004146			0.0058234	0.00540216	0.151119	0.0357478	216	44.2793	171.721	7	1	6.14771	0.852285	zinc finger protein	3	F:nucleic acid binding; C:nucleus; F:zinc ion binding	-	PF13465	Zinc-finger double domain
CPIJ002935			0.00582279	0.0080911	0.081393	0.0994079	231	59.2608	171.739	6	1	4.65807	1.34193	potassium channel modulatory factor 1	3	F:zinc ion binding; C:intracellular; F:metal ion binding	-	PF13639	Ring finger domain
CPIJ005531			0.00582225	0.00640612	0.0700629	0.0914339	414	70.4902	343.51	7	2	4.84237	2.15763	conserved hypothetical protein	1	C:integral to membrane	-	PF03188	Eukaryotic cytochrome b561
CPIJ019277			0.00582052	0.00601121	0.0197748	0.303983	444	100.388	343.612	4	2	1.96032	2.03968	fibrinogen gamma chain	2	P:signal transduction; F:receptor binding	-	PF00147	Fibrinogen beta and gamma chains, C-terminal globular domain
CPIJ004976			0.00581808	0.00625682	0.152594	0.0410032	420	76.244	343.756	13	2	10.9717	2.02832	conserved hypothetical protein	0	-
CPIJ001265			0.00581266	0.00820107	0.164629	0.0498155	846	157.847	688.153	28	4	23.004	4.99596	alkaline phosphatase	2	P:dephosphorylation; F:alkaline phosphatase activity	EC:3.1.3.1	PF00245	Alkaline phosphatase
CPIJ012368			0.0058104	0.00603862	0.0809492	0.0745976	684	167.684	516.316	16	3	13.0114	2.98864	abc transporter	4	C:integral to membrane; P:ATP catabolic process; F:ATP binding; F:ATPase activity	EC:3.6.1.3	PF00005	ABC transporter
CPIJ009737			0.00580978	0.00651825	0.0124721	0.522628	651	134.629	516.371	5	3	1.66414	3.33586	environmental stress-induced protein	1	F:metal ion binding
CPIJ010924			0.00580784	0.00687506	0.0378923	0.181437	1971	421.366	1549.63	26	9	15.5945	10.4055	conserved hypothetical protein	3	F:ARF GTPase activator activity; P:regulation of ARF GTPase activity; F:zinc ion binding
CPIJ010677			0.00580712	0.00606527	0.0589871	0.102824	1734	356.375	1377.62	29	8	20.7516	8.24839	hypothetical protein CpipJ_CPIJ010677	0	-
CPIJ001282			0.0058067	0.00579654	0.0517349	0.112043	447	102.57	344.43	7	2	5.08631	1.91369	conserved hypothetical protein	0	-
CPIJ017280			0.00579976	0.00640152	0.0328494	0.194875	435	90.1579	344.842	5	2	2.86472	2.13528	embryonic polarity dorsal	3	F:sequence-specific DNA binding transcription factor activity; C:nucleus; P:regulation of transcription, DNA-dependent	-
CPIJ009516			0.00579888	0.00622077	0.217138	0.0286489	447	102.106	344.894	20	2	18.2354	1.76465	isoform b	1	F:nucleic acid binding	-	PF01585	G-patch domain
CPIJ002307			0.00579843	0.00726374	0.0526018	0.138089	456	111.079	344.921	8	2	5.59914	2.40086	conserved hypothetical protein	0	-
CPIJ005943			0.00579587	0.00670861	0.0227886	0.294384	633	115.39	517.61	6	3	2.58562	3.41438	conserved hypothetical protein	0	-		PF06278	Protein of unknown function (DUF1032)
CPIJ008495			0.00578856	0.00688462	0.113689	0.0605568	1974	419.208	1554.79	55	9	44.9127	10.0873	aael015217- partial	4	P:transport; C:cytoplasm; C:integral to membrane; F:transporter activity	-	PF00878	Cation-independent mannose-6-phosphate receptor repeat
CPIJ001764			0.00578603	0.00544838	0.0733048	0.074325	1935	379.532	1555.47	35	9	26.8279	8.17212	chorion peroxidase	4	F:heme binding; F:peroxidase activity; P:oxidation-reduction process; P:response to oxidative stress	EC:1.11.1.7	PF03098	Animal haem peroxidase
CPIJ013829			0.00578418	0.00620391	0.0482592	0.128554	1068	203.573	864.427	15	5	9.70323	5.29677	conserved hypothetical protein	0	-
CPIJ016851			0.00578394	0.00614355	0.227833	0.0269651	396	50.2152	345.785	12	2	10.1207	1.87925	cytochrome p450	6	F:heme binding; F:oxidoreductase activity, acting on paired donors, with incorporation or reduction of molecular oxygen; F:monooxygenase activity; F:iron ion binding; F:electron carrier activity; P:oxidation-reduction process	-	PF00067	Cytochrome P450
CPIJ005904			0.0057829	0.00663019	0.0552921	0.119912	453	107.153	345.847	8	2	5.76773	2.23227	anionic trypsin-2	2	F:serine-type endopeptidase activity; P:proteolysis	EC:3.4.21.0	PF00089	Trypsin
CPIJ801582			0.0057782	0.00646194	0.0383438	0.168527	3189	766.101	2422.9	44	14	28.7021	15.2979	timeless protein	0	-		PF04821	Timeless protein
CPIJ003689			0.00577794	0.0062973	0.132041	0.0476922	387	40.856	346.144	7	2	4.98553	2.01447	calmodulin binding transcription activator 2	2	C:nucleus; F:DNA binding	-	PF03859	CG-1 domain
CPIJ017637			0.00577494	0.00571023	0.0480969	0.118723	243	69.8377	173.162	4	1	3.0903	0.909704	bombesin receptor subtype-3	2	F:signal transducer activity; P:G-protein coupled receptor signaling pathway	-
CPIJ007699			0.00577462	0.00582407	0.0972903	0.0598628	1203	163.97	1039.03	21	6	15.2247	5.77525	conserved hypothetical protein	2	F:zinc ion binding; C:nucleus	-	PF04500	FLYWCH zinc finger domain
CPIJ003034			0.00577227	0.00580831	0.277329	0.0209437	222	48.7577	173.242	11	1	10.2381	0.761879	cuticle protein	1	F:structural constituent of cuticle	-	PF00379	Insect cuticle protein
CPIJ002393			0.00577202	0.00602283	0.0871366	0.0691194	675	155.251	519.749	16	3	12.9934	3.00663	dopachrome-conversion enzyme	0	-		PF03022	Major royal jelly protein
CPIJ018624			0.00576904	0.00608602	0.13168	0.0462182	660	139.983	520.017	20	3	17.0693	2.93069	glutathione-s-transferase gst	1	F:transferase activity	-	PF13417	Glutathione S-transferase, N-terminal domain
CPIJ013771			0.00576804	0.00565942	0.151975	0.0372392	201	27.6312	173.369	5	1	4.053	0.946997	pupal cuticle protein	1	F:structural constituent of cuticle	-	PF00379	Insect cuticle protein
CPIJ003857			0.00576771	0.00680214	0.115453	0.0589172	624	103.863	520.137	15	3	11.5825	3.41746	ferritin protein	5	P:cellular iron ion homeostasis; F:oxidoreductase activity; F:ferric iron binding; P:iron ion transport; P:oxidation-reduction process	-	PF00210	Ferritin-like domain
CPIJ008530			0.00576452	0.0061132	0.0457403	0.13365	660	139.575	520.425	9	3	6.00666	2.99334	lactase-phlorizin hydrolase	3	P:carbohydrate metabolic process; F:hydrolase activity, hydrolyzing O-glycosyl compounds; F:cation binding	EC:3.2.1.0	PF00232	Glycosyl hydrolase family 1
CPIJ013743			0.00576361	0.0061258	0.0664027	0.0922522	1074	206.488	867.512	18	5	12.9723	5.02775	integrin beta-1-binding protein 2	2	F:binding; P:integrin-mediated signaling pathway	-	PF04969	CS domain
CPIJ000611			0.00576274	0.00602324	0.0744571	0.0808955	1560	345.303	1214.7	31	7	24.1326	6.86744	sulfate transporter	7	F:nucleic acid binding; P:sulfate transport; P:transmembrane transport; C:integral to membrane; C:nucleus; F:zinc ion binding; F:secondary active sulfate transmembrane transporter activity	-	PF13792	Sulfate transporter N-terminal domain with GLY motif
CPIJ016050			0.00576037	0.00596375	0.0366432	0.162752	690	169.2	520.8	9	3	5.99619	3.00381	hepatic triacylglycerol lipase	3	C:extracellular region; F:hydrolase activity; P:lipid metabolic process	-	PF00151	Lipase
CPIJ017589			0.00576006	0.00690054	0.077338	0.0892257	1041	172.954	868.046	18	5	12.4325	5.56751	conserved hypothetical protein	0	-
CPIJ008322			0.00575629	0.0064812	0.0382888	0.169271	453	105.554	347.446	6	2	3.85312	2.14688	conserved hypothetical protein	0	-
CPIJ013986			0.00575483	0.00670389	0.0642537	0.104335	1506	289.635	1216.37	26	7	18.0785	7.92145	guanine nucleotide exchange factor gef64c	4	F:Rho guanyl-nucleotide exchange factor activity; P:regulation of Rho protein signal transduction; C:intracellular; F:phospholipid binding
CPIJ001621			0.0057544	0.00622392	0.0663983	0.0937361	1296	253.323	1042.68	23	6	16.5967	6.4033	molybdenum cofactor synthesis protein 3	6	C:cytosol; P:Mo-molybdopterin cofactor biosynthetic process; F:thiosulfate sulfurtransferase activity; F:metal ion binding; P:tRNA processing; F:ATP binding	EC:2.8.1.1	PF05237	MoeZ/MoeB domain
CPIJ006081			0.00575311	0.00654309	0.0265323	0.246609	702	180.543	521.457	8	3	4.67215	3.32785	trypsin alpha	2	F:serine-type endopeptidase activity; P:proteolysis	EC:3.4.21.0	PF00089	Trypsin
CPIJ005767			0.00574405	0.00633463	0.110724	0.0572108	1128	257.534	870.466	32	5	26.8148	5.18525	protoporphyrinogen oxidase	4	P:porphyrin-containing compound biosynthetic process; F:oxygen-dependent protoporphyrinogen oxidase activity; P:oxidation-reduction process; F:nucleotide binding	EC:1.3.3.4	PF01593	Flavin containing amine oxidoreductase
CPIJ004019			0.0057402	0.00570685	0.135554	0.0421001	1275	229.737	1045.26	35	6	29.3735	5.62646	saccharopine dehydrogenase domain-containing protein	3	F:oxidoreductase activity; P:oxidation-reduction process; F:nucleotide binding	-	PF03435	Saccharopine dehydrogenase
CPIJ010824			0.00574013	0.00656269	0.0194453	0.337495	219	44.7877	174.212	2	1	0.864766	1.13523	conserved hypothetical protein	2	F:transferase activity, transferring glycosyl groups; C:membrane	-	PF02434	Fringe-like
CPIJ008352			0.00573748	0.00572145	0.0472005	0.121216	459	110.415	348.585	7	2	5.06262	1.93738	aael010806- partial	1	F:N-acetyltransferase activity	-	PF00583	Acetyltransferase (GNAT) family
CPIJ802385			0.00573164	0.00592021	0.000118404	50	231	56.5295	174.47	1	1	0.00643841	0.993562	hypothetical protein CpipJ_CPIJ017043	0	-
CPIJ009750			0.00573088	0.00610879	0.0315565	0.193583	1230	183.045	1046.96	12	6	5.69468	6.30532	rnmtl1 protein	4	F:RNA binding; F:RNA methyltransferase activity; P:RNA processing; P:RNA methylation	-	PF00588	SpoU rRNA Methylase family
CPIJ004579			0.00573061	0.0074629	0.107622	0.0693435	1038	165.492	872.508	24	5	17.5748	6.42522	conserved hypothetical protein	2	F:zinc ion binding; F:metal ion binding	-	PF13639	Ring finger domain
CPIJ013819			0.00573059	0.00831048	0.0826045	0.100606	456	106.996	349.004	11	2	8.28215	2.71785	elongation of very long chain fatty acids protein 4	1	C:integral to membrane	-	PF01151	GNS1/SUR4 family
CPIJ018636			0.00572931	0.00565093	0.0792136	0.0713378	615	91.3766	523.623	10	3	7.09827	2.90173	epidermal growth factor receptor substrate 15-like 1-like	1	F:calcium ion binding
CPIJ004089			0.00572787	0.00570081	0.000114016	50	216	41.4145	174.585	1	1	0.00472193	0.995278	conserved hypothetical protein	2	F:serine-type endopeptidase activity; P:proteolysis	EC:3.4.21.0	PF00089	Trypsin
CPIJ007971			0.00572759	0.00582384	0.000116478	49.9994	462	112.813	349.187	2	2	0.0128401	1.98716	sex peptide receptor	2	C:integral to membrane; P:G-protein coupled receptor signaling pathway
CPIJ016726			0.00572707	0.00638519	0.142447	0.0448249	846	147.563	698.437	24	4	19.7993	4.20068	zinc finger protein 343	3	F:nucleic acid binding; C:intracellular; F:zinc ion binding	-	PF00096	Zinc finger, C2H2 type
CPIJ011623			0.00572532	0.00567711	0.0146838	0.386625	672	148.012	523.988	5	3	2.11084	2.88916	conserved hypothetical protein	3	C:extracellular region; F:chitin binding; P:chitin metabolic process	-	PF01607	Chitin binding Peritrophin-A domain
CPIJ012801			0.00572443	0.00585624	0.0327444	0.178847	417	67.6203	349.38	4	2	2.07893	1.92107	conserved hypothetical protein	3	P:response to stress; C:nucleus; P:regulation of cell cycle	-	PF01248	Ribosomal protein L7Ae/L30e/S12e/Gadd45 family
CPIJ013463			0.0057241	0.00673497	0.12924	0.0521122	414	64.5996	349.4	10	2	7.80117	2.19883	conserved hypothetical protein	3	C:intracellular; P:transport; F:transporter activity	-	PF03765	CRAL/TRIO, N-terminal domain
CPIJ802131			0.00572349	0.00744248	0.1127	0.0660382	1074	200.407	873.593	28	5	21.7414	6.25862	coiled-coil domain containing 97	0	-		PF09747	Coiled-coil domain containing protein (DUF2052)
CPIJ010501			0.00572329	0.00612893	0.165313	0.0370747	864	165.101	698.899	28	4	24.2017	3.79829	udp-glucuronosyltransferase 1-4	2	F:transferase activity, transferring hexosyl groups; P:metabolic process	EC:2.4.1.0	PF00201	UDP-glucoronosyl and UDP-glucosyl transferase
CPIJ014764			0.0057206	0.00645392	0.0432967	0.149063	1101	226.966	874.034	15	5	9.52966	5.47034	beta- -galactosyltransferase	2	F:transferase activity, transferring glycosyl groups; P:carbohydrate metabolic process	-	PF02709	N-terminal domain of galactosyltransferase
CPIJ005744			0.00571641	0.00615627	0.0962255	0.0639776	1272	222.389	1049.61	26	6	19.97	6.03003	autotransporter adhesin	0	-
CPIJ018253			0.00571548	0.00557865	0.0365982	0.15243	1059	359.146	699.854	16	4	12.3358	3.66416	hypothetical protein CpipJ_CPIJ018253	0	-
CPIJ010629			0.005714	0.00573369	0.043061	0.133153	672	146.974	525.026	9	3	6.099	2.901	membrane associated progesterone receptor	1	F:heme binding	-	PF00173	Cytochrome b5-like Heme/Steroid binding domain
CPIJ013513			0.00571177	0.00580289	0.0474107	0.122396	243	67.9226	175.077	4	1	3.0407	0.959304	conserved hypothetical protein	0	-
CPIJ006867			0.00570768	0.00594068	0.0713337	0.0832801	870	169.19	700.81	16	4	11.8963	4.10373	transmembrane protease	3	C:integral to membrane; P:proteolysis; F:serine-type endopeptidase activity	EC:3.4.21.0	PF00089	Trypsin
CPIJ012287			0.00570604	0.00605409	0.0481799	0.125656	240	64.7468	175.253	4	1	2.98481	1.01519	hypothetical protein CpipJ_CPIJ012287	0	-		PF01826	Trypsin Inhibitor like cysteine rich domain
CPIJ020314			0.00570033	0.00589886	0.0473331	0.124624	438	87.1431	350.857	6	2	3.9953	2.0047	iron sulfur assembly protein 2	3	P:iron-sulfur cluster assembly; F:structural molecule activity; F:iron-sulfur cluster binding	-	PF01521	Iron-sulphur cluster biosynthesis
CPIJ802413			0.00569794	0.0085938	0.124591	0.0689759	663	136.494	526.506	21	3	16.5868	4.41317	zinc finger protein 38	3	F:nucleic acid binding; C:nucleus; F:zinc ion binding	-	PF13912	C2H2-type zinc finger
CPIJ018884			0.00569638	0.00534581	0.0378049	0.141405	438	86.9001	351.1	5	2	3.18205	1.81795	conserved hypothetical protein	0	-
CPIJ012920			0.00569449	0.0063431	0.107961	0.0587539	1287	233.352	1053.65	31	6	24.5003	6.4997	f-box only protein 9	0	-		PF12937	F-box-like
CPIJ015709			0.00569368	0.00561379	0.101546	0.0552832	1284	230.201	1053.8	27	6	21.547	5.45296	conserved hypothetical protein	3	F:sequence-specific DNA binding transcription factor activity; F:sequence-specific DNA binding; P:regulation of transcription, DNA-dependent	-	PF00170	bZIP transcription factor
CPIJ002374			0.00569224	0.00751327	0.071748	0.104718	2049	467.903	1581.1	43	9	31.7612	11.2388	conserved hypothetical protein	2	F:nucleic acid binding; F:nucleotide binding	-	PF00076	RNA recognition motif. (a.k.a. RRM, RBD, or RNP domain)
CPIJ019916			0.00569145	0.00692075	0.062039	0.111555	891	188.191	702.809	16	4	11.2946	4.7054	conserved hypothetical protein	2	C:integral to membrane; P:G-protein coupled receptor signaling pathway	-	PF00001	7 transmembrane receptor (rhodopsin family)
CPIJ004956			0.00569126	0.00704455	0.0863498	0.0815816	1086	207.46	878.54	23	5	17.0943	5.9057	conserved hypothetical protein	0	-		PF00086	Thyroglobulin type-1 repeat
CPIJ006243			0.0056893	0.00563546	0.0165795	0.339905	474	122.463	351.537	4	2	2.02458	1.97542	gastrula zinc finger protein	3	F:zinc ion binding; F:nucleic acid binding; C:intracellular	-	PF13465	Zinc-finger double domain
CPIJ016678			0.00568903	0.00556211	0.0341834	0.162714	237	61.2228	175.777	3	1	2.04475	0.955246	corazonin receptor	3	C:integral to membrane; F:signal transducer activity; P:G-protein coupled receptor signaling pathway	-	PF00001	7 transmembrane receptor (rhodopsin family)
CPIJ006885			0.00568774	0.00635113	0.0444381	0.142921	1935	352.647	1582.35	25	9	15.2319	9.76814	porcupine	1	C:integral to membrane	-	PF03062	MBOAT, membrane-bound O-acyltransferase family
CPIJ013909			0.00568679	0.0072149	0.0718618	0.1004	1779	372.234	1406.77	35	8	25.3727	9.6273	ferritin heavy chain-like protein	3	F:nucleic acid binding; C:nucleus; F:zinc ion binding	-	PF13894	C2H2-type zinc finger
CPIJ017613			0.00568664	0.00566051	0.0943113	0.0600194	846	142.597	703.403	17	4	13.1166	3.88335	wilms tumor 1 associated protein	0	-
CPIJ015395			0.00568267	0.00722535	0.0562759	0.128392	435	83.0529	351.947	7	2	4.53346	2.46654	zinc finger protein 206 3	2	F:zinc ion binding; C:nucleus	-	PF13894	C2H2-type zinc finger
CPIJ010829			0.00567376	0.00600095	0.111612	0.0537662	1548	314.245	1233.75	39	7	32.2024	6.79763	sodium nucleoside cotransporter 1	4	C:membrane; F:nucleoside:sodium symporter activity; F:nucleoside binding; P:transport	-	PF07670	Nucleoside recognition
CPIJ010515			0.00566544	0.00621116	0.102313	0.0607073	1908	319.42	1588.58	40	9	30.7239	9.27608	phosphoenolpyruvate carboxykinase	5	P:gluconeogenesis; F:GTP binding; F:kinase activity; P:phosphorylation; F:phosphoenolpyruvate carboxykinase (GTP) activity	EC:4.1.1.32	PF00821	Phosphoenolpyruvate carboxykinase
CPIJ002372			0.00566135	0.00511808	0.130491	0.0392216	1623	209.911	1413.09	33	8	26.1069	6.89312	conserved hypothetical protein	2	F:nucleic acid binding; F:nucleotide binding	-	PF00076	RNA recognition motif. (a.k.a. RRM, RBD, or RNP domain)
CPIJ008774			0.00566059	0.00590901	0.161585	0.036569	1293	233.04	1059.96	41	6	35.153	5.847	transmembrane protein 135	1	C:integral to membrane	-
CPIJ005411			0.00566043	0.0058962	0.0441523	0.133543	246	69.3353	176.665	4	1	2.98449	1.01551	conserved hypothetical protein	0	-
CPIJ000099			0.00565556	0.00679665	0.00998533	0.680663	258	81.183	176.817	2	1	0.805644	1.19436	porcn_anoga ame: full=probable protein-cysteine n-palmitoyltransferase porcupine	7	C:integral to membrane; C:membrane; C:endoplasmic reticulum membrane; F:transferase activity; C:endoplasmic reticulum; P:Wnt receptor signaling pathway; F:transferase activity, transferring acyl groups
CPIJ000193			0.00565168	0.00573719	0.010257	0.559344	630	99.1837	530.816	4	3	1.00162	2.99838	calcyphosine tpp	1	F:calcium ion binding	-	PF13499	EF-hand domain pair
CPIJ011293			0.00565052	0.00583176	0.154328	0.037788	2166	396.254	1769.75	65	10	55.6141	9.3859	gamma-tubulin complex component 6	3	C:microtubule organizing center; P:microtubule cytoskeleton organization; C:spindle pole	-	PF04130	Spc97 / Spc98 family
CPIJ005895			0.00564961	0.00587697	0.0351402	0.167243	1146	260.983	885.017	14	5	8.93348	5.06652	conserved hypothetical protein	2	F:fatty-acyl-CoA reductase (alcohol-forming) activity; F:nucleotide binding	-	PF07993	Male sterility protein
CPIJ016412			0.00564798	0.00620743	0.0636228	0.0975661	930	221.782	708.218	18	4	13.7241	4.27587	conserved hypothetical protein	2	F:zinc ion binding; C:nucleus	-	PF07776	Zinc-finger associated domain (zf-AD)
CPIJ007774			0.00564771	0.00634018	0.0550204	0.115233	1023	137.686	885.314	13	5	7.46722	5.53278	vps9-ankyrin repeat-containing protein	0	-		PF02204	Vacuolar sorting protein 9 (VPS9) domain
CPIJ010470			0.00564344	0.00549091	0.0287015	0.191311	729	197.409	531.591	8	3	5.27993	2.72007	conserved hypothetical protein	0	-		PF07165	Protein of unknown function (DUF1397)
CPIJ014670			0.00564108	0.0055317	0.0940158	0.0588379	462	107.458	354.542	11	2	9.21176	1.78824	endothelin b receptor	2	C:integral to membrane; P:G-protein coupled receptor signaling pathway	-	PF00001	7 transmembrane receptor (rhodopsin family)
CPIJ010132			0.00562957	0.00582293	0.046126	0.12624	468	112.733	355.267	7	2	5.00776	1.99224	predicted protein	2	F:zinc ion binding; C:nucleus	-	PF07776	Zinc-finger associated domain (zf-AD)
CPIJ004947			0.00562928	0.00644112	0.0974193	0.0661175	1884	462.856	1421.14	53	8	44.0563	8.94369	leucine-rich repeat-containing protein 1	0	-		PF13306	Leucine rich repeats (6 copies)
CPIJ014908			0.00562769	0.00567461	0.0738395	0.0768505	4053	1032.22	3020.78	88	17	71.8425	16.1575	host cell factor c1	0	-
CPIJ011161			0.00562664	0.00593622	0.0338326	0.175459	210	32.2743	177.726	2	1	1.01719	0.98281	zinc finger protein	3	F:nucleic acid binding; C:nucleus; F:zinc ion binding	-	PF13465	Zinc-finger double domain
CPIJ003352			0.00562117	0.00588911	0.0115403	0.51031	960	248.405	711.595	7	4	2.84338	4.15662	zinc finger	1	F:metal ion binding	-
CPIJ008303			0.00561873	0.00582227	0.0310562	0.187475	873	161.095	711.905	9	4	4.9221	4.0779	zinc finger protein 322a	3	F:nucleic acid binding; C:nucleus; F:zinc ion binding	-	PF13465	Zinc-finger double domain
CPIJ800249			0.00561687	0.00602525	0.109517	0.0550168	1104	213.824	890.176	28	5	22.782	5.21803	cytochrome p450	6	F:heme binding; F:oxidoreductase activity, acting on paired donors, with incorporation or reduction of molecular oxygen; F:monooxygenase activity; F:iron ion binding; F:electron carrier activity; P:oxidation-reduction process	-	PF00067	Cytochrome P450
CPIJ019417			0.0056147	0.00560047	0.000112009	50	207	28.8958	178.104	1	1	0.00323433	0.996766	zinc finger protein 322a	3	F:nucleic acid binding; C:nucleus; F:zinc ion binding	-	PF13465	Zinc-finger double domain
CPIJ011990			0.00561387	0.00580402	0.0435593	0.133244	939	226.479	712.521	14	4	9.86474	4.13526	isoform a	1	C:membrane	-	PF01299	Lysosome-associated membrane glycoprotein (Lamp)
CPIJ801495			0.00561228	0.0068184	0.0467273	0.145919	1155	264.097	890.903	18	5	12.0624	5.93761	serine protease	2	F:serine-type endopeptidase activity; P:proteolysis	EC:3.4.21.0	PF00089	Trypsin
CPIJ018627			0.00561181	0.00608954	0.192087	0.0317019	672	137.413	534.587	27	3	24.0356	2.96437	a chain structures of an insect epsilon-class glutathione s- transferase from the malaria vector anopheles gambiae: evidence for high ddt-detoxifying activity	1	F:transferase activity	-	PF00043	Glutathione S-transferase, C-terminal domain
CPIJ009345			0.00561041	0.00546329	0.106322	0.0513843	2211	428.602	1782.4	52	10	42.8446	9.15539	katanin p80 wd40-containing subunit b1	2	C:small-subunit processome; P:rRNA processing	-	PF08625	Utp13 specific WD40 associated domain
CPIJ006098			0.00560678	0.00603801	0.0753474	0.0801356	987	273.578	713.422	23	4	19.0244	3.97559	conserved hypothetical protein	1	F:nucleotide binding
CPIJ015737			0.00560613	0.00585828	0.0902184	0.0649344	1779	351.995	1427.01	39	8	30.8728	8.12719	dna repair protein xp-c rad4	3	F:damaged DNA binding; P:nucleotide-excision repair; C:nucleus	-	PF10403	Rad4 beta-hairpin domain 1
CPIJ003495			0.00560545	0.00602879	0.0600817	0.100343	6720	1546.46	5173.54	120	29	89.8413	30.1587	fatty acid synthase s-acetyltransferase	7	F:hydrolase activity, acting on ester bonds; F:transferase activity, transferring acyl groups other than amino-acyl groups; F:oxidoreductase activity; P:biosynthetic process; P:oxidation-reduction process; F:nucleotide binding; F:zinc ion binding	EC:2.3.1.0	PF08659	KR domain
CPIJ004238			0.00560533	0.00573751	0.122285	0.046919	453	96.197	356.803	13	2	11.073	1.927	mitochondrial brown fat uncoupling protein	3	P:mitochondrial transport; C:integral to membrane; C:mitochondrial membrane	-	PF00153	Mitochondrial carrier protein
CPIJ009112			0.00560445	0.00616129	0.0650798	0.0946728	945	231.282	713.718	19	4	14.7041	4.29586	serine protease	2	F:serine-type endopeptidase activity; P:proteolysis	EC:3.4.21.0	PF00089	Trypsin
CPIJ001933			0.00560296	0.00421634	0.130865	0.032219	609	73.5687	535.431	10	3	8.10052	1.89948	testis-specific zinc finger protein topi	3	F:zinc ion binding; F:nucleic acid binding; C:intracellular	-	PF00096	Zinc finger, C2H2 type
CPIJ020121			0.00559118	0.00621736	0.0225856	0.27528	441	83.2941	357.706	4	2	1.83302	2.16698	transient receptor potential cation channel protein painless	6	C:integral to membrane; C:membrane; P:transmembrane transport; P:ion transport; F:ion channel activity; P:transport
CPIJ000025			0.00559095	0.00605693	0.0954184	0.0634776	714	177.419	536.581	19	3	15.9399	3.06014	negative elongation factor e	3	F:translation elongation factor activity; F:nucleotide binding; P:translational elongation	-	PF00076	RNA recognition motif. (a.k.a. RRM, RBD, or RNP domain)
CPIJ001608			0.00558909	0.00523954	0.054387	0.0963381	951	235.32	715.68	16	4	12.3744	3.62562	estrogen sulfotransferase	1	F:sulfotransferase activity	EC:2.8.2.0	PF00685	Sulfotransferase domain
CPIJ008955			0.0055755	0.00551973	0.126141	0.0437585	1068	171.22	896.78	25	5	20.3386	4.6614	arf gtpase-activating protein	3	F:zinc ion binding; P:regulation of ARF GTPase activity; F:ARF GTPase activator activity	-	PF01412	Putative GTPase activating protein for Arf
CPIJ007776			0.00557507	0.00576803	0.000115361	50	219	39.6299	179.37	1	1	0.00439935	0.995601	apolipophorin-iii	3	C:extracellular region; F:lipid binding; P:lipid transport	-	PF07464	Apolipophorin-III precursor (apoLp-III)
CPIJ016277			0.00557337	0.00549436	0.0271456	0.202404	471	112.151	358.849	5	2	3.03466	1.96534	polymerase i polypeptide d	0	-
CPIJ016362			0.00556979	0.00675377	0.051492	0.131161	1749	312.683	1436.32	25	8	15.6007	9.39932	salivary alpha-glucosidase	3	F:maltose alpha-glucosidase activity; P:carbohydrate metabolic process; F:cation binding	EC:3.2.1.20	PF00128	Alpha amylase, catalytic domain
CPIJ012176			0.00556767	0.00575831	0.129401	0.0444997	1275	197.354	1077.65	30	6	24.1353	5.86465	ribosomal protein s6 polypeptide	5	F:calmodulin-dependent protein kinase activity; C:ribosome; F:protein kinase C activity; P:protein phosphorylation; F:ATP binding	EC:2.7.11.17; EC:2.7.11.13	PF00433	Protein kinase C terminal domain
CPIJ018214			0.00556211	0.011324	0.0170286	0.665001	240	60.212	179.788	3	1	1.00481	1.99519	peroxisome assembly factor-2	2	F:nucleoside-triphosphatase activity; F:ATP binding	EC:3.6.1.15	PF00004	ATPase family associated with various cellular activities (AAA)
CPIJ012158			0.00556081	0.00673353	0.0475033	0.141749	1380	301.016	1078.98	21	6	13.9249	7.07514	sphingomyelin phosphodiesterase	2	F:sphingomyelin phosphodiesterase activity; P:sphingomyelin catabolic process	EC:3.1.4.12	PF00149	Calcineurin-like phosphoesterase
CPIJ000757			0.00555857	0.00564369	0.0961278	0.0587103	558	198.195	359.805	17	2	15.3626	1.63739	zinc finger protein 674	3	F:nucleic acid binding; C:nucleus; F:zinc ion binding	-	PF07776	Zinc-finger associated domain (zf-AD)
CPIJ019363			0.00555732	0.00600534	0.0906995	0.0662114	1125	225.286	899.714	25	5	19.7718	5.22817	chitinase domain-containing protein 1	3	P:carbohydrate metabolic process; F:hydrolase activity, hydrolyzing O-glycosyl compounds; F:cation binding	EC:3.2.1.0	PF00704	Glycosyl hydrolases family 18
CPIJ802042			0.00555722	0.00587053	0.0590829	0.0993608	483	123.108	359.892	9	2	6.97421	2.02579	conserved hypothetical protein	0	-
CPIJ018005			0.00555633	0.00559449	0.0180381	0.310149	3777	897.403	2879.6	32	16	16.0384	15.9616	protein translocase subunit seca	6	F:helicase activity; C:intracellular; P:protein import; F:ATP binding; P:protein targeting; C:membrane	-	PF07517	SecA DEAD-like domain
CPIJ004415			0.00555543	0.00599057	0.0588584	0.101779	2829	668.947	2160.05	52	12	39.1375	12.8625	rabaptin-5	0	-
CPIJ005699			0.00554833	0.00560723	0.106335	0.0527319	1503	241.364	1261.64	31	7	24.3016	6.69839	n-acetyl galactosaminyl transferase	4	F:transferase activity, transferring glycosyl groups; C:Golgi apparatus; P:protein glycosylation; C:integral to membrane	-	PF00652	Ricin-type beta-trefoil lectin domain
CPIJ010860			0.00554722	0.00544647	0.101927	0.053435	1179	277.648	901.352	30	5	25.5652	4.43481	cat eye syndrome critical region protein 1	3	C:extracellular space; F:deaminase activity; P:purine ribonucleoside monophosphate biosynthetic process	-	PF08451	Adenosine/AMP deaminase N-terminal
CPIJ012005			0.0055464	0.00573464	0.0184493	0.310833	810	269.109	540.891	8	3	4.92383	3.07617	ap endonuclease	6	P:DNA repair; P:nucleic acid phosphodiester bond hydrolysis; F:endonuclease activity; F:nuclease activity; C:intracellular; F:DNA binding
CPIJ002674			0.00554582	0.00530871	0.0944891	0.0561833	477	116.368	360.632	12	2	10.2205	1.77954	glutathione s-transferase 1	1	F:transferase activity	-	PF13417	Glutathione S-transferase, N-terminal domain
CPIJ002392			0.00554347	0.00597603	0.0408904	0.146148	1962	518.862	1443.14	29	8	20.6187	8.38126	conserved hypothetical protein	1	F:phospholipid binding
CPIJ007065			0.00554261	0.00545973	0.0235695	0.231644	453	92.1594	360.841	4	2	2.09756	1.90244	adenylate kinase isoenzyme	4	P:phosphorylation; P:nucleobase-containing compound metabolic process; F:nucleobase-containing compound kinase activity; F:ATP binding	-	PF00406	Adenylate kinase
CPIJ005594			0.00553913	0.00628289	0.0207113	0.303356	1170	267.331	902.669	11	5	5.43394	5.56606	zinc binding dehydrogenase	4	F:zinc ion binding; F:oxidoreductase activity; P:oxidation-reduction process; F:nucleotide binding	-	PF13602	Zinc-binding dehydrogenase
CPIJ010627			0.0055386	0.0054094	0.100101	0.0540392	1095	192.244	902.756	23	5	18.3448	4.65521	gdp-fucose protein o-fucosyltransferase 2	1	F:transferase activity, transferring glycosyl groups	-	PF10250	GDP-fucose protein O-fucosyltransferase
CPIJ018804			0.0055299	0.00640987	0.0133332	0.480744	249	68.1653	180.835	2	1	0.878981	1.12102	voltage-dependent para-like sodium channel	2	F:nucleic acid binding; F:zinc ion binding	-	PF03732	Retrotransposon gag protein
CPIJ015423			0.00552795	0.00537912	0.0255704	0.210365	444	82.2017	361.798	4	2	2.07696	1.92304	speckle-type poz protein	2	F:nucleic acid binding; F:nucleotide binding	-	PF00076	RNA recognition motif. (a.k.a. RRM, RBD, or RNP domain)
CPIJ009349			0.00552771	0.00585704	0.0852366	0.068715	1440	354.56	1085.44	34	6	28.0908	5.90923	conserved hypothetical protein	0	-
CPIJ003500			0.00552691	0.00579672	0.0790725	0.0733089	3135	782.871	2352.13	71	13	58.1845	12.8155	conserved hypothetical protein	0	-		PF07738	Sad1 / UNC-like C-terminal
CPIJ004940			0.00552459	0.00759828	0.149506	0.0508224	213	31.9913	181.009	6	1	4.65999	1.34001	cytidine and deoxycytidylate deaminase zinc-binding region	3	F:hydrolase activity; F:zinc ion binding; P:metabolic process	-	PF00383	Cytidine and deoxycytidylate deaminase zinc-binding region
CPIJ012909			0.00551582	0.00520886	0.173456	0.0300298	693	149.11	543.89	26	3	23.4332	2.56678	3-hydroxybutyrate dehydrogenase type 2-like protein	3	F:oxidoreductase activity; P:oxidation-reduction process; F:nucleotide binding	-	PF00106	short chain dehydrogenase
CPIJ017085			0.0055129	0.00546837	0.100804	0.0542473	2385	389.682	1995.32	47	11	36.7829	10.2171	2-oxoglutarate dehydrogenase e1 component	3	F:oxoglutarate dehydrogenase (succinyl-transferring) activity; P:tricarboxylic acid cycle; F:thiamine pyrophosphate binding	EC:1.2.4.2	PF02779	Transketolase, pyrimidine binding domain
CPIJ018081			0.00551177	0.00551706	0.0853686	0.0646263	735	190.71	544.29	18	3	15.197	2.803	conserved hypothetical protein	3	P:signal transduction; F:protein domain specific binding; C:intracellular
CPIJ016437			0.00551024	0.00772374	0.0751294	0.102806	1137	229.598	907.402	23	5	16.3549	6.64506	conserved hypothetical protein	2	F:zinc ion binding; C:intracellular	-
CPIJ009506			0.00550591	0.00546192	0.103548	0.0527478	2091	274.773	1816.23	33	10	24.4688	8.53125	hexamerin 2 beta	0	-		PF03722	Hemocyanin, all-alpha domain
CPIJ008465			0.00550555	0.00462782	0.1569	0.0294953	219	37.365	181.635	6	1	5.2476	0.752399	conserved hypothetical protein	0	-
CPIJ017183			0.00550503	0.00506963	0.0245749	0.206293	456	92.6955	363.304	4	2	2.21174	1.78826	forked protein	0	-
CPIJ009446			0.00550476	0.00596225	0.0230993	0.258114	486	122.678	363.322	5	2	2.83378	2.16622	dead box atp-dependent rna helicase	3	F:helicase activity; F:nucleic acid binding; F:ATP binding	-	PF00271	Helicase conserved C-terminal domain
CPIJ001364			0.00549734	0.00596548	0.207986	0.0286822	438	74.1884	363.812	17	2	14.9037	2.09627	conserved hypothetical protein	0	-		PF08620	RPAP1-like, C-terminal
CPIJ017493			0.00549638	0.00507889	0.0822631	0.0617396	294	112.062	181.938	9	1	8.18006	0.819942	beta- -galactosyltransferase	3	P:O-glycan processing; C:membrane; F:glycoprotein-N-acetylgalactosamine 3-beta-galactosyltransferase activity	EC:2.4.1.122	PF02434	Fringe-like
CPIJ001250			0.00549524	0.00629128	0.0335018	0.187789	1197	287.121	909.879	15	5	9.4038	5.5962	potentail helicase mov-10	3	F:ATP binding; F:helicase activity; F:DNA binding	-	PF13087	AAA domain
CPIJ007898			0.00549405	0.00832193	0.0215232	0.386649	1524	431.908	1092.09	18	6	9.1017	8.8983	conserved hypothetical protein	3	C:extracellular region; F:chitin binding; P:chitin metabolic process	-	PF01607	Chitin binding Peritrophin-A domain
CPIJ007009			0.00549282	0.00566683	0.0555496	0.102014	2706	521.335	2184.67	40	12	28.0212	11.9788	conserved hypothetical protein	3	P:ubiquitin-dependent protein catabolic process; F:cysteine-type peptidase activity; F:ubiquitin thiolesterase activity	EC:3.1.2.15	PF00443	Ubiquitin carboxyl-terminal hydrolase
CPIJ007264			0.00549187	0.00545137	0.0852693	0.0639313	678	131.738	546.262	13	3	10.2759	2.72411	conserved hypothetical protein	5	F:signal transducer activity; P:regulation of transcription, DNA-dependent; F:ATP binding; F:helicase activity; P:signal transduction	-	PF14214	Helitron helicase-like domain at N-terminus
CPIJ017511			0.00549144	0.00624291	0.114667	0.0544441	1374	281.393	1092.61	37	6	30.5432	6.45678	brain chitinase and chia	6	F:chitinase activity; P:carbohydrate metabolic process; P:chitin catabolic process; F:cation binding; F:chitin binding; C:extracellular region	EC:3.2.1.14	PF01607	Chitin binding Peritrophin-A domain
CPIJ801798			0.00548809	0.00682958	0.0761057	0.089738	1593	317.509	1275.49	32	7	23.5209	8.47914	conserved hypothetical protein	6	C:cullin-RING ubiquitin ligase complex; F:ubiquitin protein ligase binding; P:ER to Golgi vesicle-mediated transport; P:transport; P:ubiquitin-dependent protein catabolic process; C:cis-Golgi network
CPIJ009477			0.00548479	0.00720224	0.120372	0.059833	903	173.71	729.29	24	4	19.1816	4.8184	cytochrome p450	6	F:heme binding; F:oxidoreductase activity, acting on paired donors, with incorporation or reduction of molecular oxygen; F:monooxygenase activity; F:iron ion binding; F:electron carrier activity; P:oxidation-reduction process	-	PF00067	Cytochrome P450
CPIJ004717			0.0054807	0.0055291	0.0866297	0.0638245	1341	246.246	1094.75	26	6	20.2532	5.74682	zinc finger protein 467	3	F:nucleic acid binding; C:nucleus; F:zinc ion binding	-	PF07776	Zinc-finger associated domain (zf-AD)
CPIJ001107			0.00548	0.00585137	0.0472872	0.123741	1446	351.113	1094.89	22	6	15.8746	6.12544	serine protease 27	3	C:integral to membrane; P:proteolysis; F:serine-type endopeptidase activity	EC:3.4.21.0	PF00089	Trypsin
CPIJ801461			0.0054784	0.0059113	0.0892125	0.0662609	1380	284.787	1095.21	30	6	23.9078	6.09221	dihydroxyacetone kinase	3	P:glycerol metabolic process; F:glycerone kinase activity; P:phosphorylation	EC:2.7.1.29	PF02733	Dak1 domain
CPIJ012326			0.00547565	0.00584441	0.0562302	0.103937	1410	314.239	1095.76	23	6	16.8816	6.11843	zinc finger protein 449	3	F:nucleic acid binding; C:nucleus; F:zinc ion binding	-	PF13894	C2H2-type zinc finger
CPIJ010305			0.00547529	0.00614875	0.0481213	0.127776	2106	462.251	1643.75	31	9	21.3151	9.68489	CHKov1	1	F:transferase activity, transferring phosphorus-containing groups	-	PF02958	Ecdysteroid kinase
CPIJ001446			0.00547408	0.00567539	0.0623457	0.091031	231	48.3207	182.679	4	1	2.97586	1.02414	conserved hypothetical protein	0	-		PF12937	F-box-like
CPIJ017496			0.00547352	0.00573207	0.0703202	0.0815139	666	117.907	548.093	11	3	7.97727	3.02273	roundabout	0	-
CPIJ013672			0.00547338	0.00568071	0.06178	0.0919506	684	135.893	548.107	11	3	8.02409	2.97591	aael013735- partial	6	F:microtubule-severing ATPase activity; P:microtubule severing; F:microtubule binding; C:centrosome; P:ATP catabolic process; P:developmental process	EC:3.6.4.3
CPIJ004541			0.00546656	0.00661403	0.0801216	0.0825499	465	99.1392	365.861	10	2	7.66495	2.33505	aael006405- partial	0	-
CPIJ002643			0.00546617	0.00576658	0.119073	0.0484291	1368	270.344	1097.66	36	6	30.0844	5.91558	cdna sequence	2	P:oxidation-reduction process; F:oxidoreductase activity	-	PF07992	Pyridine nucleotide-disulphide oxidoreductase
CPIJ005748			0.00546479	0.00650669	0.0608075	0.107005	1176	261.051	914.949	21	5	15.2723	5.72768	leucine rich protein	0	-		PF13855	Leucine rich repeat
CPIJ012120			0.00545975	0.00575853	0.165184	0.0348613	945	212.366	732.634	35	4	31.2426	3.75745	nf-x1-type zinc finger protein nfxl1	4	F:sequence-specific DNA binding transcription factor activity; C:nucleus; F:zinc ion binding; P:regulation of transcription, DNA-dependent	-	PF01422	NF-X1 type zinc finger
CPIJ801494			0.00545872	0.00620232	0.106892	0.058024	210	26.8071	183.193	4	1	2.86426	1.13574	conserved hypothetical protein	0	-
CPIJ000423			0.00545316	0.00537973	0.0339479	0.15847	1467	366.72	1100.28	18	6	12.1996	5.80043	amp dependent coa ligase	2	F:ligase activity; P:metabolic process	-	PF13193	Domain of unknown function (DUF4009)
CPIJ004414			0.00545238	0.00510525	0.0311938	0.163662	504	137.188	366.812	6	2	4.17363	1.82637	salivary protein	0	-
CPIJ019641			0.00545133	0.00651054	0.122296	0.0532359	1539	254.913	1284.09	39	7	30.753	8.24699	leucine-rich repeat-containing protein 47	2	F:phenylalanine-tRNA ligase activity; F:RNA binding	EC:6.1.1.20	PF13855	Leucine rich repeat
CPIJ001267			0.00544688	0.00538306	0.0888352	0.060596	414	46.8168	367.183	6	2	4.0671	1.9329	conserved hypothetical protein	0	-
CPIJ001755			0.00544661	0.0055027	0.0905096	0.0607969	1179	260.997	918.003	27	5	22.2434	4.75655	cytochrome p450 4p1	6	F:heme binding; F:oxidoreductase activity, acting on paired donors, with incorporation or reduction of molecular oxygen; F:monooxygenase activity; F:iron ion binding; F:electron carrier activity; P:oxidation-reduction process	-	PF00067	Cytochrome P450
CPIJ001292			0.00544581	0.00535366	0.0809747	0.0661153	900	165.491	734.509	17	4	13.1432	3.85678	conserved hypothetical protein	0	-
CPIJ009218			0.00544382	0.00566155	0.0948329	0.0597003	1158	239.527	918.473	26	5	21.1567	4.84326	predicted protein	2	F:zinc ion binding; C:intracellular	-
CPIJ002934			0.00544331	0.00674643	0.0979304	0.0688901	1170	251.442	918.558	28	5	22.3702	5.62982	charlatan	3	F:zinc ion binding; F:nucleic acid binding; C:intracellular	-
CPIJ013738			0.00544295	0.00560861	0.0346155	0.162026	693	141.828	551.172	8	3	4.90899	3.09101	cytoplasmic polyadenylation element binding protein	2	F:nucleic acid binding; F:nucleotide binding	-
CPIJ000180			0.00543995	0.00574189	0.0226336	0.253689	957	221.699	735.301	9	4	4.88759	4.11241	conserved hypothetical protein	3	F:zinc ion binding; F:nucleic acid binding; C:intracellular	-	PF13465	Zinc-finger double domain
CPIJ003521			0.00543884	0.00601183	0.0420324	0.143028	1107	187.687	919.313	13	5	7.6445	5.3555	zinc finger protein 850-like	3	F:nucleic acid binding; C:nucleus; F:zinc ion binding	-	PF07776	Zinc-finger associated domain (zf-AD)
CPIJ802449			0.00543758	0.0067778	0.126126	0.0537382	1155	235.474	919.526	33	5	27.2762	5.72383	gamma glutamyl transpeptidases	2	F:gamma-glutamyltransferase activity; P:glutathione metabolic process	EC:2.3.2.2	PF01019	Gamma-glutamyltranspeptidase
CPIJ015239			0.00543683	0.00561046	0.0551762	0.101683	3261	869.897	2391.1	57	13	44.5488	12.4512	aael015203- partial	0	-
CPIJ014472			0.00543658	0.00543961	0.000108792	50	243	59.0613	183.939	1	1	0.00638087	0.993619	40s ribosomal protein sa	3	F:structural constituent of ribosome; C:small ribosomal subunit; P:translation	-
CPIJ009911			0.00543484	0.00626408	0.186171	0.033647	885	149.008	735.992	30	4	25.7248	4.27523	o-sialoglycoprotein endopeptidase	0	-		PF00814	Glycoprotease family
CPIJ004578			0.00543424	0.00716472	0.0777046	0.0922046	939	202.926	736.074	20	4	14.9874	5.01259	selenocysteine-specific elongation factor	5	F:translation elongation factor activity; P:translational elongation; P:GTP catabolic process; F:GTPase activity; F:GTP binding	-	PF03144	Elongation factor Tu domain 2
CPIJ014695			0.00543211	0.00771638	0.0529075	0.145847	723	170.728	552.272	13	3	8.83282	4.16718	conserved hypothetical protein	0	-
CPIJ001370			0.00542982	0.005897	0.0925328	0.0637288	1458	352.985	1105.01	37	6	30.8461	6.15386	glucose dehydrogenase	4	F:flavin adenine dinucleotide binding; F:choline dehydrogenase activity; P:oxidation-reduction process; P:alcohol metabolic process	EC:1.1.99.1	PF05199	GMC oxidoreductase
CPIJ019497			0.00542785	0.00536255	0.0424793	0.126239	1794	320.125	1473.88	21	8	13.2809	7.71905	microtubule-associated protein	0	-		PF05672	MAP7 (E-MAP-115) family
CPIJ010708			0.00542086	0.00568939	0.146215	0.0389112	693	139.582	553.418	22	3	19.0596	2.94043	mosc domain-containing protein mitochondrial	4	P:metabolic process; F:molybdenum ion binding; F:pyridoxal phosphate binding; F:catalytic activity	-	PF03476	MOSC N-terminal beta barrel domain
CPIJ013200			0.00541758	0.00628856	0.0324001	0.19409	1719	426.906	1292.09	21	7	13.2288	7.77119	conserved hypothetical protein	3	F:zinc ion binding; C:intracellular; F:metal ion binding	-	PF00651	BTB/POZ domain
CPIJ801399			0.00541156	0.00807487	0.0287366	0.280996	444	74.421	369.579	5	2	2.0873	2.9127	conserved hypothetical protein	0	-
CPIJ009005			0.00540905	0.00564826	0.133299	0.042373	441	71.2492	369.751	11	2	9.01716	1.98284	atp-dependent dna helicase mer3	3	F:nucleic acid binding; F:ATP binding; F:ATP-dependent helicase activity	-	PF00270	DEAD/DEAH box helicase
CPIJ005384			0.00540791	0.00640487	0.0553267	0.115765	1839	544.602	1294.4	36	7	28.232	7.76795	conserved hypothetical protein	0	-
CPIJ001935			0.00540576	0.0053442	0.0901921	0.0592535	471	101.024	369.976	11	2	9.03861	1.96139	conserved hypothetical protein	3	P:nucleic acid phosphodiester bond hydrolysis; F:DNA binding; F:nuclease activity	-	PF09588	YqaJ-like viral recombinase domain
CPIJ002073			0.00540486	0.00512816	0.0359627	0.142597	1677	381.867	1295.13	20	7	13.4805	6.51954	juvenile hormone esterase	1	F:hydrolase activity	-	PF00135	Carboxylesterase family
CPIJ013850			0.00540213	0.00512078	0.0312349	0.163944	438	67.7759	370.224	4	2	2.11021	1.88979	tumor protein d54-like	0	-		PF04201	Tumour protein D52 family
CPIJ007534			0.00539697	0.00572384	0.0638015	0.0897132	972	230.843	741.157	18	4	13.9747	4.02527	cytochrome oxidase biogenesis protein (oxa1 mitochondrial)	2	P:protein insertion into membrane; C:integral to membrane	-	PF02096	60Kd inner membrane protein
CPIJ006918			0.00539338	0.00593475	0.0841723	0.0705072	468	97.1748	370.825	10	2	7.87985	2.12015	isoform a	1	C:intracellular	-	PF00653	Inhibitor of Apoptosis domain
CPIJ011221			0.00539278	0.00574278	0.0561597	0.102258	477	106.134	370.866	8	2	5.89397	2.10603	conserved hypothetical protein	3	C:nucleus; F:DNA binding; F:zinc ion binding	-	PF00096	Zinc finger, C2H2 type
CPIJ005805			0.0053927	0.00561237	0.017188	0.326529	246	60.5642	185.436	2	1	1.00012	0.999883	nuclear body associated kinase	3	P:protein phosphorylation; F:ATP binding; F:protein serine/threonine kinase activity	EC:2.7.11.0
CPIJ003374			0.00538755	0.00557012	0.0929336	0.0599365	702	145.161	556.839	16	3	13.009	2.991	aldo-keto reductase	2	P:oxidation-reduction process; F:oxidoreductase activity	-	PF00248	Aldo/keto reductase family
CPIJ010444		X	0.00538747	0.0130011	0.0182949	0.71064	279	93.384	185.616	4	1	1.65802	2.34198	hypothetical protein CpipJ_CPIJ010444	0	-
CPIJ004003			0.00538474	0.00562087	0.0110949	0.506618	456	84.5802	371.42	3	2	0.930311	2.06969	acid phosphatase-1	1	F:acid phosphatase activity	EC:3.1.3.2	PF00328	Histidine phosphatase superfamily (branch 2)
CPIJ013304			0.00538456	0.00584457	0.0771297	0.0757759	705	147.851	557.149	14	3	10.8903	3.1097	conserved hypothetical protein	0	-		PF00646	F-box domain
CPIJ004434			0.00538444	0.00533818	0.0939296	0.0568317	927	184.118	742.882	21	4	17.0828	3.91717	wdvcf 1	0	-
CPIJ011942			0.00538433	0.00545948	0.0508622	0.107339	495	123.552	371.448	8	2	6.04822	1.95178	conserved hypothetical protein	0	-
CPIJ003469			0.0053797	0.00686279	0.0984462	0.069711	450	78.2317	371.768	10	2	7.51158	2.48842	conserved hypothetical protein	0	-
CPIJ801686			0.00537459	0.00580976	0.082395	0.0705111	1197	266.696	930.304	26	5	20.8674	5.13257	zinc carboxypeptidase	3	P:proteolysis; F:metallocarboxypeptidase activity; F:zinc ion binding	EC:3.4.17.0	PF00246	Zinc carboxypeptidase
CPIJ000654			0.00537229	0.00538901	0.0589697	0.0913859	498	125.719	372.281	9	2	7.08319	1.91681	protein unc- isoform e	3	P:proteolysis; F:serine-type endopeptidase activity; F:catalytic activity		PF07679	Immunoglobulin I-set domain
CPIJ004283			0.00537141	0.00537784	0.0892486	0.0602569	744	185.487	558.513	18	3	15.2357	2.76432	conserved hypothetical protein	0	-		PF06775	Putative adipose-regulatory protein (Seipin)
CPIJ009018			0.00536383	0.00685537	0.0930577	0.0736679	456	83.1315	372.868	10	2	7.51641	2.48359	fibrinogen and fibronectin	2	P:signal transduction; F:receptor binding	-	PF00147	Fibrinogen beta and gamma chains, C-terminal globular domain
CPIJ015480			0.00536144	0.006461	0.0528628	0.122222	222	35.4829	186.517	3	1	1.82652	1.17348	zinc finger protein 3	3	F:nucleic acid binding; C:nucleus; F:zinc ion binding	-	PF13894	C2H2-type zinc finger
CPIJ800256			0.00535946	0.00540576	0.000108115	50	207	20.4144	186.586	1	1	0.00218343	0.997817	cytochrome p450	6	F:heme binding; F:oxidoreductase activity, acting on paired donors, with incorporation or reduction of molecular oxygen; F:monooxygenase activity; F:iron ion binding; F:electron carrier activity; P:oxidation-reduction process	-	PF00067	Cytochrome P450
CPIJ008888			0.00535547	0.00502414	0.26176	0.0191937	213	26.2755	186.725	7	1	6.15981	0.840189	conserved hypothetical protein	3	P:protein folding; C:prefoldin complex; F:unfolded protein binding	-	PF01920	Prefoldin subunit
CPIJ008243			0.00535378	0.00573184	0.112151	0.0511082	4980	1057.54	3922.46	132	21	110.965	21.0348	conserved hypothetical protein	0	-
CPIJ014970			0.00535136	0.00650659	0.113491	0.0573313	1167	232.658	934.342	31	5	25.1983	5.80166	niemann-pick c1 protein	2	C:membrane; F:hedgehog receptor activity	-	PF02460	Patched family
CPIJ010743			0.00535103	0.00685081	0.0478417	0.143197	714	153.36	560.64	11	3	7.22028	3.77972	pyridoxal phosphate phosphatase	2	P:metabolic process; F:hydrolase activity	-	PF13344	Haloacid dehalogenase-like hydrolase
CPIJ016969			0.00535097	0.00541935	0.034295	0.158021	774	213.354	560.646	10	3	7.06592	2.93408	conserved hypothetical protein	0	-
CPIJ003437			0.00534822	0.00533755	0.116815	0.0456923	645	84.0664	560.934	11	3	8.42988	2.57012	aael011521- partial	3	C:integral to membrane; P:G-protein coupled receptor signaling pathway; F:G-protein coupled receptor activity	-
CPIJ001174			0.00534797	0.00625167	0.141523	0.0441743	1359	237.081	1121.92	37	6	30.6027	6.39727	plasma glutamate carboxypeptidase	2	F:carboxypeptidase activity; P:proteolysis	-	PF04389	Peptidase family M28
CPIJ016365			0.00534094	0.00623898	0.140423	0.04443	684	122.301	561.699	20	3	16.6105	3.38948	conserved hypothetical protein	0	-
CPIJ013882			0.00534067	0.00574378	0.0180501	0.318213	477	102.515	374.485	4	2	1.84978	2.15022	heat shock protein 67b2	1	P:response to stress	-	PF00581	Rhodanese-like domain
CPIJ801658			0.00533632	0.0066514	0.0888399	0.0748695	918	168.42	749.58	19	4	14.2512	4.74877	trehalose-6-phosphate synthase 1	2	F:catalytic activity; P:trehalose biosynthetic process	-	PF02358	Trehalose-phosphatase
CPIJ014384			0.00533527	0.00544084	0.000108817	50	228	40.5684	187.432	1	1	0.00431022	0.99569	isoform a	3	F:electron carrier activity; F:cytochrome-c oxidase activity; C:mitochondrial respiratory chain	EC:1.9.3.1	PF02238	Cytochrome c oxidase subunit VIIa
CPIJ016888			0.00533382	0.00652718	0.208372	0.0313247	210	22.5168	187.483	5	1	3.96567	1.03433	xanthine dehydrogenase oxidase	6	F:flavin adenine dinucleotide binding; F:oxidoreductase activity, acting on CH-OH group of donors; F:iron ion binding; F:electron carrier activity; F:2 iron, 2 sulfur cluster binding; P:oxidation-reduction process	-	PF03450	CO dehydrogenase flavoprotein C-terminal domain
CPIJ013719			0.0053333	0.0108091	0.0639538	0.169014	423	47.9984	375.002	7	2	3.01663	3.98337	aael011405- partial	0	-		PF07679	Immunoglobulin I-set domain
CPIJ001263			0.00532781	0.00659604	0.122501	0.0538449	957	206.223	750.777	28	4	23.4108	4.58917	membrane-bound alkaline phosphatase	2	P:dephosphorylation; F:alkaline phosphatase activity	EC:3.1.3.1	PF00245	Alkaline phosphatase
CPIJ801471			0.00532737	0.00556956	0.0577651	0.0964173	1419	292.74	1126.26	22	6	16.0473	5.95269	chitooligosaccharidolytic beta-n-acetylglucosaminidase	3	P:carbohydrate metabolic process; F:cation binding; F:beta-N-acetylhexosaminidase activity	EC:3.2.1.52	PF02838	Glycosyl hydrolase family 20, domain 2
CPIJ018332			0.00532578	0.00768761	0.0515879	0.149019	246	58.2343	187.766	4	1	2.70182	1.29818	tetratricopeptide repeat tpr	2	F:zinc ion binding; F:nucleic acid binding	-
CPIJ006319			0.00532529	0.00488019	0.183152	0.0266456	1308	181.299	1126.7	36	6	30.8856	5.1144	origin recognition complex subunit 2	3	P:DNA replication; C:origin recognition complex; C:nucleus	-	PF04084	Origin recognition complex subunit 2
CPIJ014796			0.00532045	0.00600874	0.230056	0.0261187	240	52.0458	187.954	10	1	9.13807	0.861929	transmembrane protease	4	C:integral to membrane; F:scavenger receptor activity; P:proteolysis; F:serine-type endopeptidase activity	EC:3.4.21.0	PF00089	Trypsin
CPIJ014048			0.00531365	0.00571456	0.234006	0.0244205	447	70.6108	376.389	16	2	14.1571	1.84288	artemis protein	1	F:hydrolase activity	-	PF12706	Beta-lactamase superfamily domain
CPIJ008772			0.00531272	0.00604444	0.193249	0.031278	1104	162.863	941.137	35	5	29.6423	5.35771	conserved hypothetical protein	0	-
CPIJ015061			0.00531124	0.00581676	0.0555935	0.10463	474	97.4399	376.56	7	2	4.98452	2.01548	inositol triphosphate 3-kinase c	1	F:inositol-1,4,5-trisphosphate 3-kinase activity
CPIJ004981			0.00530916	0.0065148	0.101125	0.064423	3168	719.398	2448.6	83	13	68.0732	14.9268	conserved hypothetical protein	0	-
CPIJ010680			0.005308	0.00521918	0.0845812	0.0617061	1332	201.633	1130.37	22	6	16.3456	5.6544	conserved hypothetical protein	0	-		PF10037	Mitochondrial 28S ribosomal protein S27
CPIJ010401			0.00530674	0.00712037	0.0724226	0.0983169	942	188.242	753.758	19	4	13.633	5.36703	phosphatase 1 regulatory subunit 7	0	-		PF12799	Leucine Rich repeats (2 copies)
CPIJ019453			0.0053023	0.005437	0.0407997	0.133261	2763	499.833	2263.17	32	12	19.9578	12.0422	conserved hypothetical protein	0	-		PF04499	SIT4 phosphatase-associated protein
CPIJ017436			0.00530168	0.00637273	0.00527881	1.20723	885	319.142	565.858	5	3	1.59211	3.40789	a-kinase anchoring protein akap120	2	F:kinase activity; P:phosphorylation	-
CPIJ014230			0.00529616	0.00570584	0.0665843	0.0856934	486	108.368	377.632	9	2	6.93044	2.06956	secreted protein	0	-		PF06585	Haemolymph juvenile hormone binding protein (JHBP)
CPIJ014739			0.00528991	0.0053743	0.0736677	0.0729533	507	128.922	378.078	11	2	9.06138	1.93862	conserved hypothetical protein	1	F:DNA binding	-	PF05225	helix-turn-helix, Psq domain
CPIJ005122			0.00527989	0.0050484	0.0637048	0.0792468	978	220.408	757.592	17	4	13.3607	3.63931	esterase fe4	1	F:hydrolase activity		PF00135	Carboxylesterase family
CPIJ001253			0.00527906	0.00522887	0.0220914	0.236693	2262	557.154	1704.85	21	9	12.1791	8.82086	potentail helicase mov-10	2	F:ATP binding; F:helicase activity	-	PF13087	AAA domain
CPIJ018316			0.00527819	0.0055095	0.123781	0.04451	1203	255.706	947.294	33	5	28.3288	4.67122	membrane protein	3	P:protein folding; F:heat shock protein binding; F:unfolded protein binding	-	PF00226	DnaJ domain
CPIJ004942			0.00527782	0.00514115	0.0644885	0.0797219	2094	388.755	1705.25	32	9	23.7091	8.29093	transcription factor cp2b	0	-		PF04516	CP2 transcription factor
CPIJ009244			0.00527537	0.00536601	0.0596455	0.0899652	2142	435.955	1706.04	34	9	25.1467	8.85328	conserved hypothetical protein	2	F:zinc ion binding; F:nucleic acid binding	-
CPIJ017962			0.00527451	0.00586537	0.0170752	0.343503	243	53.409	189.591	2	1	0.901159	1.09884	aael005466- partial	1	C:integral to membrane	-	PF10639	Uncharacterised protein family UPF0546
CPIJ000387			0.00527427	0.00571236	0.045114	0.12662	1200	252.002	947.998	16	5	10.8377	5.16231	ubiquitin conjugating enzyme 7 interacting protein	7	F:metal ion binding; P:transcription, DNA-dependent; F:DNA binding; C:LUBAC complex; P:protein ubiquitination; F:ubiquitin-protein ligase activity; F:zinc ion binding	EC:6.3.2.19	PF01485	IBR domain
CPIJ000561			0.00527318	0.00570505	0.0733406	0.0777884	711	142.083	568.917	13	3	9.91252	3.08748	conserved hypothetical protein	1	F:N-acetyltransferase activity	-	PF00583	Acetyltransferase (GNAT) family
CPIJ002013			0.00526658	0.0051837	0.0966056	0.0536585	744	174.37	569.63	18	3	15.3154	2.68465	hypothetical protein CpipJ_CPIJ002013	3	F:zinc ion binding; F:nucleic acid binding; C:intracellular	-	PF00096	Zinc finger, C2H2 type
CPIJ019998			0.00526576	0.00651799	0.224846	0.0289887	462	82.188	379.812	20	2	17.6372	2.36276	conserved oligomeric golgi complex component 8	1	F:cation binding	-	PF04124	Dor1-like family
CPIJ014457			0.0052656	0.00557642	0.0717437	0.0777269	222	32.0878	189.912	3	1	2.05476	0.945244	tripartite motif protein 45	3	F:zinc ion binding; C:intracellular; F:metal ion binding	-	PF00643	B-box zinc finger
CPIJ011883			0.00526363	0.00486201	0.103891	0.046799	1617	287.122	1329.88	34	7	27.943	6.05696	serotonin receptor	2	C:integral to membrane; P:G-protein coupled receptor signaling pathway	-	PF00001	7 transmembrane receptor (rhodopsin family)
CPIJ006594			0.00526319	0.00536826	0.0163973	0.327387	822	252.004	569.996	7	3	4.02183	2.97817	conserved hypothetical protein	0	-
CPIJ004767			0.00525616	0.00797473	0.0648445	0.122982	939	177.988	761.012	17	4	11.1415	5.85852	dachshund	2	C:nucleus; F:nucleotide binding	-
CPIJ014903			0.00525588	0.00587149	0.0287318	0.204355	222	31.7373	190.263	2	1	0.898838	1.10116	zinc metalloprotease	2	F:metalloendopeptidase activity; P:proteolysis	EC:3.4.24.0	PF05649	Peptidase family M13
CPIJ000015			0.00525148	0.00672234	0.168661	0.0398571	432	51.1554	380.845	10	2	7.7117	2.2883	conserved hypothetical protein	0	-
CPIJ011159			0.00525048	0.00472283	0.0236503	0.199694	810	238.624	571.376	8	3	5.41214	2.58786	zinc finger protein	3	F:nucleic acid binding; C:nucleus; F:zinc ion binding	-	PF13912	C2H2-type zinc finger
CPIJ003069			0.00525026	0.00568014	0.0300428	0.189068	771	199.6	571.4	9	3	5.83942	3.16058	ecdysone-induced protein 74ef	5	P:regulation of transcription, DNA-dependent; F:sequence-specific DNA binding; C:nucleus; F:sequence-specific DNA binding transcription factor activity; F:DNA binding
CPIJ014904			0.00524433	0.00526842	0.106553	0.049444	2052	335.862	1716.14	42	9	33.5291	8.47086	zinc metalloprotease	2	F:metalloendopeptidase activity; P:proteolysis	EC:3.4.24.0	PF01431	Peptidase family M13
CPIJ014050			0.00524167	0.00543511	0.0511257	0.106309	234	43.2209	190.779	3	1	2.04186	0.958144	mitochondrial cytochrome c oxidase assembly protein cu2+ chaperone cox17	3	C:mitochondrial intermembrane space; P:copper ion transport; F:copper chaperone activity	-	PF05051	Cytochrome C oxidase copper chaperone (COX17)
CPIJ012933			0.00524054	0.00731445	0.144127	0.0507499	459	77.3604	381.64	13	2	10.397	2.60302	mit domain-containing protein 1	0	-		PF04212	MIT (microtubule interacting and transport) domain
CPIJ014707			0.00523934	0.00575173	0.022845	0.251772	741	168.409	572.591	7	3	3.7715	3.2285	aael005032- partial	0	-		PF06916	Protein of unknown function (DUF1279)
CPIJ012756			0.00523808	0.00479937	0.050004	0.0959798	450	68.1812	381.819	5	2	3.25205	1.74795	microsomal glutathione s-transferase	1	F:transferase activity	-	PF01124	MAPEG family
CPIJ003671			0.00523658	0.00506646	0.0425625	0.119036	747	174.107	572.893	10	3	7.18554	2.81446	zinc finger protein 124	3	F:nucleic acid binding; C:nucleus; F:zinc ion binding	-	PF07776	Zinc-finger associated domain (zf-AD)
CPIJ019339			0.00523656	0.00791757	0.0743516	0.106488	255	64.0352	190.965	6	1	4.55385	1.44615	conserved hypothetical protein	0	-
CPIJ009379			0.00523653	0.00556724	0.0175001	0.318126	489	107.068	381.932	4	2	1.87369	2.12631	conserved hypothetical protein	0	-
CPIJ003249			0.00522706	0.00627388	0.0252619	0.248354	1242	285.44	956.56	13	5	7.095	5.905	conserved hypothetical protein	2	F:zinc ion binding; C:nucleus		PF04500	FLYWCH zinc finger domain
CPIJ009617			0.00522691	0.0048239	0.101642	0.0474598	1188	231.412	956.588	28	5	23.4078	4.59224	predicted protein	0	-		PF13516	Leucine Rich repeat
CPIJ011096			0.00522635	0.00546072	0.162419	0.0336213	255	63.6616	191.338	10	1	9.08223	0.917765	tbc1 domain family member 5	3	F:Rab GTPase activator activity; C:intracellular; P:positive regulation of Rab GTPase activity	-
CPIJ012324			0.00522579	0.00546021	0.0520449	0.104913	972	206.565	765.435	14	4	10.0809	3.91908	zinc finger imprinted 3	3	F:nucleic acid binding; C:intracellular; F:zinc ion binding	-	PF13894	C2H2-type zinc finger
CPIJ002957			0.0052248	0.00643318	0.0284049	0.226482	222	30.6046	191.395	2	1	0.827687	1.17231	sugar transporter	4	C:integral to membrane; P:transmembrane transport; F:transmembrane transporter activity; P:carbohydrate transport	-	PF00083	Sugar (and other) transporter
CPIJ015394			0.00522336	0.00528801	0.0925767	0.0571203	498	115.105	382.895	12	2	10.084	1.91604	zinc finger protein 206 3	2	F:zinc ion binding; C:nucleus	-	PF07776	Zinc-finger associated domain (zf-AD)
CPIJ000812			0.0052222	0.00521585	0.0826826	0.0630829	1632	291.568	1340.43	29	7	22.4804	6.51959	conserved hypothetical protein	2	F:zinc ion binding; F:metal ion binding	-	PF00856	SET domain
CPIJ008859			0.00521819	0.00573001	0.0279217	0.205217	1008	241.45	766.55	11	4	6.66054	4.33946	conserved hypothetical protein	0	-		PF09995	Uncharacterized protein conserved in bacteria (DUF2236)
CPIJ005547			0.00521753	0.0052298	0.0868285	0.0602313	663	88.0155	574.985	10	3	7.17629	2.82371	conserved hypothetical protein	5	F:odorant binding; F:olfactory receptor activity; P:sensory perception of smell; C:membrane; P:detection of chemical stimulus involved in sensory perception of smell
CPIJ014047			0.00521511	0.00680434	0.0669072	0.101698	1050	282.998	767.002	23	4	18.0303	4.96969	inosine-uridine preferring nucleoside hydrolase	2	F:purine nucleosidase activity; P:metabolic process	EC:3.2.2.1	PF01156	Inosine-uridine preferring nucleoside hydrolase
CPIJ009725			0.00521505	0.00516268	0.0887423	0.0581761	1800	457.727	1342.27	45	7	38.4418	6.55818	conserved hypothetical protein	0	-
CPIJ016192			0.00521114	0.00513925	0.0960838	0.0534872	1092	324.414	767.586	32	4	28.4052	3.5948	conserved hypothetical protein	3	P:carbohydrate metabolic process; F:hydrolase activity, hydrolyzing O-glycosyl compounds; F:cation binding	EC:3.2.1.0	PF00728	Glycosyl hydrolase family 20, catalytic domain
[truncated: 9,997 more rows]
