# Supplementary material for: Genetic divergence between populations of feral and domestic forms of a mosquito disease vector assessed by transcriptomics
Source: PeerJ. 2015 Feb 26;3:e807. doi: 10.7717/peerj.807 (PMC4349049; doi:10.7717/peerj.807)
Supplement: Table S2 — Gene set composing the serine-type endopeptidase ontology, found to be enriched in the 95th percentile of top-scoring Culex pipiens forms pipiens and molestus homologous codon sequence alignments as ranked by Ka value. [file peerj-03-807-s003.xlsx]

## Sheet: Table S2.
Cx. quinq reference	Observed Ka	Ka	Ks	Ka/Ks	Length	S-Sites	N-Sites	# Subst.	S-Subst.	Observed N-Subst.	Modeled N-Subst.	Annotation	# GO terms	GO terms	Enzyme code	Pfam ID	Pfam annotation
CPIJ015401	0.0129931	0.0150476	0.0425664	0.353509	327	96.1087	230.891	7	3.78528	3	3.21472	galactose-specific C-type lectin, putative	3	F:carbohydrate binding; P:proteolysis; F:serine-type endopeptidase activity	EC:3.4.21.0	PF00059	Lectin C-type domain
CPIJ801497	0.0134435	0.0170427	0.0302633	0.563147	201	52.2292	148.771	4	1.53605	2	2.46395	serine protease	2	F:serine-type endopeptidase activity; P:proteolysis	EC:3.4.21.0	PF12032	Regulatory CLIP domain of proteinases
CPIJ010298	0.0134572	0.0138286	0.0884447	0.156353	651	130.834	520.166	18	11.1	7	6.90002	granzyme C precursor	2	F:serine-type endopeptidase activity; P:proteolysis	EC:3.4.21.0	PF12032	Regulatory CLIP domain of proteinases
CPIJ019923	0.013845	0.0154847	0.0324783	0.476771	474	112.858	361.142	9	3.56344	5	5.43656	proclotting enzyme precursor	2	F:serine-type endopeptidase activity; P:proteolysis	EC:3.4.21.0	PF12032	Regulatory CLIP domain of proteinases
CPIJ003717	0.0139761	0.0151241	0.148051	0.102154	339	52.7983	286.202	12	7.72328	4	4.27672	vitamin K-dependent protein C precursor	2	F:serine-type endopeptidase activity; P:proteolysis	EC:3.4.21.0	PF12032	Regulatory CLIP domain of proteinases
CPIJ009142	0.0150718	0.019082	0.0748904	0.254799	858	194.51	663.49	26	13.9101	10	12.0899	coagulation factor VII precursor	2	F:serine-type endopeptidase activity; P:proteolysis	EC:3.4.21.0	PF00089	Trypsin
CPIJ016937	0.0130509	0.0143115	0.0667903	0.214275	627	167.262	459.738	17	10.6988	6	6.30118	coagulation factor X precursor	2	F:serine-type endopeptidase activity; P:proteolysis	EC:3.4.21.0	PF00089	Trypsin
CPIJ017738	0.0133932	0.01912	0.151975	0.12581	393	94.3411	298.659	18	12.8729	4	5.12706	plasminogen precursor	2	F:serine-type endopeptidase activity; P:proteolysis	EC:3.4.21.0	PF00089	Trypsin
CPIJ001056	0.0120887	0.015192	0.135373	0.112223	738	158.946	579.054	28	19.8745	7	8.12547	clip-domain serine proteinase	2	F:serine-type endopeptidase activity; P:proteolysis	EC:3.4.21.0	PF00089	Trypsin
CPIJ005466	0.013989	0.0143283	0.0539493	0.265588	723	151.124	571.876	16	7.97994	8	8.02006	conserved hypothetical protein	2	P:proteolysis; F:serine-type endopeptidase activity	EC:3.4.21.0	PF00089	Trypsin
CPIJ019882	0.0136216	0.0154282	0.0931137	0.165692	744	156.696	587.304	23	14.1886	8	8.81141	serine protease	2	F:serine-type endopeptidase activity; P:proteolysis	EC:3.4.21.0	PF00089	Trypsin
CPIJ001979	0.0143439	0.0170093	0.0612284	0.2778	357	78.1365	278.864	9	4.51932	4	4.48068	conserved hypothetical protein	2	F:serine-type endopeptidase activity; P:proteolysis	EC:3.4.21.0	PF00089	Trypsin
CPIJ010297	0.0174208	0.0187955	0.0497047	0.378144	573	113.779	459.221	14	5.54186	8	8.45814	coagulation factor X precursor	2	F:serine-type endopeptidase activity; P:proteolysis	EC:3.4.21.0	PF00089	Trypsin
CPIJ019952	0.0151299	0.0166263	0.169948	0.0978314	330	65.6223	264.378	14	10.042	4	3.95797	serine protease, putative	2	P:proteolysis; F:serine-type endopeptidase activity	EC:3.4.21.0	PF00089	Trypsin
CPIJ011378	0.0216129	0.0228194	0.129636	0.176026	510	139.851	370.149	25	17.0544	8	7.94557	cationic trypsin precursor	2	F:serine-type endopeptidase activity; P:proteolysis	EC:3.4.21.0	PF00089	Trypsin
CPIJ013043	0.0105781	0.017445	0.147171	0.118536	252	62.9312	189.069	11	8.11134	2	2.88866	chymotrypsin A precursor	2	F:serine-type endopeptidase activity; P:proteolysis	EC:3.4.21.0	PF00089	Trypsin
CPIJ013430	0.0139217	0.0144496	0.0612589	0.235878	459	99.8482	359.152	11	5.95094	5	5.04906	trypsin precursor	2	F:serine-type endopeptidase activity; P:proteolysis	EC:3.4.21.0	PF00089	Trypsin
CPIJ013186	0.0152158	0.017262	0.0241162	0.715785	270	72.8363	197.164	5	1.70208	3	3.29792	trypsin 5G1 precursor	2	F:serine-type endopeptidase activity; P:proteolysis	EC:3.4.21.0	PF00089	Trypsin
CPIJ003622	0.0204411	0.0227412	0.0504149	0.451081	1149	366.265	782.735	35	17.8208	16	17.1792	elastase-2A precursor	2	F:serine-type endopeptidase activity; P:proteolysis	EC:3.4.21.0	PF00089	Trypsin
CPIJ006012	0.0132122	0.01333	0.042782	0.311581	753	223.187	529.813	16	9.19728	7	6.80272	serine protease	2	F:serine-type endopeptidase activity; P:proteolysis	EC:3.4.21.0	PF00089	Trypsin
CPIJ015106	0.0121838	0.0130795	0.0743857	0.175834	327	80.7716	246.228	9	5.8593	3	3.1407	tonin precursor	2	F:serine-type endopeptidase activity; P:proteolysis	EC:3.4.21.0	PF00089	Trypsin
CPIJ014654	0.0112251	0.0190916	0.0265147	0.720037	204	25.8277	178.172	4	0.670333	2	3.32967	kallikrein-7 precursor	5	F:serine-type endopeptidase activity; F:RNA-directed DNA polymerase activity; P:RNA-dependent DNA replication; F:RNA binding; P:proteolysis	EC:3.4.21.0; EC:2.7.7.49	PF00089	Trypsin
CPIJ004984	0.0117969	0.0126144	0.0846741	0.148975	783	189.626	593.374	23	15.6871	7	7.31289	serine proteases 1/2 precursor	2	F:serine-type endopeptidase activity; P:proteolysis	EC:3.4.21.0	PF00089	Trypsin
CPIJ002754	0.0192882	0.0211093	0.0942381	0.224	849	226.857	622.143	33	20.4422	12	12.5578	vitamin K-dependent protein C precursor	2	F:serine-type endopeptidase activity; P:proteolysis	EC:3.4.21.0	PF00089	Trypsin
CPIJ015688	0.0142792	0.0154794	0.068194	0.22699	954	253.679	700.321	27	16.5986	10	10.4014	tryptase, putative	2	F:serine-type endopeptidase activity; P:proteolysis	EC:3.4.21.0	PF00089	Trypsin
CPIJ001111	0.0159564	0.0236775	0.170559	0.138822	813	186.291	626.709	43	29.3111	10	13.6889	proacrosin, putative	3	C:integral to membrane; P:proteolysis; F:serine-type endopeptidase activity	EC:3.4.21.0	PF00089	Trypsin
CPIJ004640	0.0157595	0.0161735	0.0816445	0.198096	750	178.916	571.084	23	14.0905	9	8.9095	trypsin 5G1 precursor	2	F:serine-type endopeptidase activity; P:proteolysis	EC:3.4.21.0	PF00089	Trypsin
CPIJ015107	0.0236162	0.0265652	0.0450026	0.590303	549	167.906	381.094	17	7.26556	9	9.73444	myeloblastin precursor	4	C:membrane; F:scavenger receptor activity; P:proteolysis; F:serine-type endopeptidase activity	EC:3.4.21.0	PF00089	Trypsin
CPIJ801563	0.0157997	0.021429	0.0889368	0.240947	417	100.538	316.462	15	8.53035	5	6.46965	trypsin 7 precursor	2	F:serine-type endopeptidase activity; P:proteolysis	EC:3.4.21.0	PF00089	Trypsin
CPIJ020109	0.018506	0.0195212	0.0479785	0.406874	579	146.707	432.293	15	6.82154	8	8.17846	trypsin-2 precursor	2	F:serine-type endopeptidase activity; P:proteolysis	EC:3.4.21.0	PF00089	Trypsin
CPIJ006014	0.0110519	0.013078	0.0690193	0.189483	579	126.591	452.409	14	8.34738	5	5.65262	serine protease	2	F:serine-type endopeptidase activity; P:proteolysis	EC:3.4.21.0	PF00089	Trypsin
CPIJ020281	0.0199994	0.0216718	0.191851	0.112962	297	46.9915	250.008	13	8.11999	5	4.88001	serine protease	2	F:serine-type endopeptidase activity; P:proteolysis	EC:3.4.21.0	PF00089	Trypsin
CPIJ006502	0.0425493	0.0560597	0.0555519	1.00914	246	57.9828	188.017	13	3.04287	8	9.95713	late trypsin	2	F:serine-type endopeptidase activity; P:proteolysis	EC:3.4.21.0	PF00089	Trypsin
CPIJ014656	0.0177941	0.0207207	0.0791021	0.261949	585	135.412	449.588	19	10.162	8	8.838	coagulation factor XII precursor	2	F:serine-type endopeptidase activity; P:proteolysis	EC:3.4.21.0	PF00089	Trypsin
CPIJ012712	0.0109536	0.0115199	0.018149	0.634738	237	54.4118	182.588	3	0.958475	2	2.04152	coagulation factor X precursor	2	F:serine-type endopeptidase activity; P:proteolysis	EC:3.4.21.0	PF00089	Trypsin
CPIJ010496	0.0198302	0.0217228	0.0761333	0.285326	519	115.574	403.426	17	8.51719	8	8.48281	plasminogen precursor	2	F:serine-type endopeptidase activity; P:proteolysis	EC:3.4.21.0	PF00089	Trypsin
CPIJ008482	0.0136818	0.0152735	0.0873789	0.174797	792	207.282	584.718	26	17.4136	8	8.58635	prostasin precursor	2	F:serine-type endopeptidase activity; P:proteolysis	EC:3.4.21.0	PF00089	Trypsin
CPIJ009130	0.0126626	0.0133914	0.0182687	0.733025	1071	202.299	868.701	15	3.61645	11	11.3835	serine protease	2	F:serine-type endopeptidase activity; P:proteolysis	EC:3.4.21.0	PF00089	Trypsin
CPIJ002137	0.0145155	0.0150143	0.01902	0.789391	381	105.432	275.568	6	1.95871	4	4.04129	serine proteases 1/2 precursor	2	F:serine-type endopeptidase activity; P:proteolysis	EC:3.4.21.0	PF00089	Trypsin
CPIJ015103	0.026877	0.0274104	0.0383855	0.714083	585	138.522	446.478	17	5.14902	12	11.851	trypsin-5 precursor	2	F:serine-type endopeptidase activity; P:proteolysis	EC:3.4.21.0	PF00089	Trypsin
CPIJ020192	0.0113455	0.0116178	0.027813	0.417711	249	72.7188	176.281	4	1.98748	2	2.01252	trypsin-like salivary secreted protein	2	F:serine-type endopeptidase activity; P:proteolysis	EC:3.4.21.0	PF00089	Trypsin
CPIJ010497	0.0144739	0.0195103	0.0724082	0.269449	825	203.191	621.809	26	14.2499	9	11.7501	elastase, putative	2	F:serine-type endopeptidase activity; P:proteolysis	EC:3.4.21.0	PF00089	Trypsin
CPIJ012501	0.0295561	0.0339167	0.0665189	0.50988	225	55.8297	169.17	9	3.53635	5	5.46365	clip-domain serine protease, putative	2	F:serine-type endopeptidase activity; P:proteolysis	EC:3.4.21.0	PF00089	Trypsin
CPIJ009061	0.0106416	0.0114407	0.0521865	0.219228	894	236.204	657.796	19	11.7974	7	7.20256	mannan-binding lectin serine protease 2 precursor	2	F:serine-type endopeptidase activity; P:proteolysis	EC:3.4.21.0	PF00089	Trypsin
CPIJ014651	0.0136263	0.0134998	0.0256657	0.525987	300	79.8368	220.163	5	2.0404	3	2.9596	proacrosin, putative	2	F:serine-type endopeptidase activity; P:proteolysis	EC:3.4.21.0	PF00089	Trypsin
CPIJ012156	0.0115147	0.011875	0.0339176	0.350114	468	120.618	347.382	8	3.9834	4	4.0166	trypsin-1 precursor	2	F:serine-type endopeptidase activity; P:proteolysis	EC:3.4.21.0	PF00089	Trypsin
CPIJ015765	0.0110018	0.0129712	0.087155	0.14883	1074	255.952	818.048	31	21.0073	9	9.99266	salivary plasminogen activator alpha 1 precursor	2	F:serine-type endopeptidase activity; P:proteolysis	EC:3.4.21.0	PF00089	Trypsin
CPIJ015368	0.0139525	0.0151532	0.075448	0.200843	720	146.627	573.373	19	10.642	8	8.35799	serine protease SP24D precursor	2	F:serine-type endopeptidase activity; P:proteolysis	EC:3.4.21.0	PF00089	Trypsin
CPIJ017964	0.02593	0.0298434	0.117635	0.253695	486	138.912	347.088	25	15.3009	9	9.69905	trypsin 7 precursor	2	F:serine-type endopeptidase activity; P:proteolysis	EC:3.4.21.0	PF00089	Trypsin
CPIJ015104	0.018278	0.0223324	0.166282	0.134304	435	106.736	328.264	23	16.2769	6	6.72314	trypsin-7 precursor	2	F:serine-type endopeptidase activity; P:proteolysis	EC:3.4.21.0	PF00089	Trypsin
CPIJ801479	0.0129377	0.014091	0.108307	0.130103	297	65.1189	231.881	10	6.83395	3	3.16605	conserved hypothetical protein	2	F:serine-type endopeptidase activity; P:proteolysis	EC:3.4.21.0
