# Supplementary material for: Genetic divergence between populations of feral and domestic forms of a mosquito disease vector assessed by transcriptomics
Source: PeerJ. 2015 Feb 26;3:e807. doi: 10.7717/peerj.807 (PMC4349049; doi:10.7717/peerj.807)
Supplement: Table S4 — Gene set composing the receptor binding ontology, found to be enriched in the 95th percentile of top-scoring Culex pipiens forms pipiens and molestus homologous codon sequence alignments as ranked by Ka value. [file peerj-03-807-s005.xlsx]

## Sheet: Table S4.
Cx. quinq reference	Observed Ka	Ka	Length	S-Sites	N-Sites	# Subst.	S-Subst.	Observed N-Subst.	Modeled N-Subst.	Annotation	# GO terms	GO terms	Enzyme code	Pfam ID	Pfam annotation
CPIJ000330	0.0126231	0.012544	222	63.56	158.44	4	2.09359	2	1.90641	tenascin precursor	2	P:signal transduction; F:receptor binding	-	PF00147	Fibrinogen beta and gamma chains, C-terminal globular domain
CPIJ000332	0.0232172	0.0259871	486	141.428	344.572	15	6.58233	8	8.41767	angiopoietin-1 precursor	2	P:signal transduction; F:receptor binding	-	PF00147	Fibrinogen beta and gamma chains, C-terminal globular domain
CPIJ000333	0.024286	0.0337644	264	58.1203	205.88	16	9.44786	5	6.55214	aslectin AL-1	2	P:signal transduction; F:receptor binding	-	PF00147	Fibrinogen beta and gamma chains, C-terminal globular domain
CPIJ000868	0.0169059	0.0124129	396	100.245	295.755	12	8.62384	5	3.37616	conserved hypothetical protein	3	C:extracellular space; P:signal transduction; F:receptor binding	-	PF00147	Fibrinogen beta and gamma chains, C-terminal globular domain
CPIJ000937	0.0135204	0.0124609	297	75.1126	221.887	8	5.47977	3	2.52023	techylectin-5B precursor	2	P:signal transduction; F:receptor binding	-	PF00147	Fibrinogen beta and gamma chains, C-terminal globular domain
CPIJ003752	0.0329244	0.035843	282	69.3916	212.608	10	2.79928	7	7.20072	ficolin-2 precursor	2	P:signal transduction; F:receptor binding	-	PF00147	Fibrinogen beta and gamma chains, C-terminal globular domain
CPIJ010085	0.0150631	0.0158257	417	85.063	331.937	9	3.84607	5	5.15393	angiopoietin-1 precursor	2	P:signal transduction; F:receptor binding	-	PF00147	Fibrinogen beta and gamma chains, C-terminal globular domain
CPIJ010086	0.0229618	0.0258001	576	140.495	435.505	15	4.10683	10	10.8932	ficolin-1 precursor	2	P:signal transduction; F:receptor binding	-	PF00147	Fibrinogen beta and gamma chains, C-terminal globular domain
CPIJ010087	0.0304833	0.0350711	330	100.366	229.634	11	3.27249	7	7.72751	fibrinogen gamma chain precursor	2	P:signal transduction; F:receptor binding	-	PF00147	Fibrinogen beta and gamma chains, C-terminal globular domain
CPIJ010089	0.0118929	0.0130042	336	83.7482	252.252	4	0.844167	3	3.15583	microfibril-associated glycoprotein 4 precursor	2	P:signal transduction; F:receptor binding	-	PF00147	Fibrinogen beta and gamma chains, C-terminal globular domain
CPIJ012626	0.0296326	0.0396356	534	129.041	404.959	20	4.67621	12	15.3238	fibrinogen and fibronectin	2	P:signal transduction; F:receptor binding	-	PF00147	Fibrinogen beta and gamma chains, C-terminal globular domain
CPIJ012627	0.0214417	0.0275637	249	62.4481	186.552	7	2.01033	4	4.98967	angiopoietin-2	3	C:extracellular space; P:signal transduction; F:receptor binding	-	PF00147	Fibrinogen beta and gamma chains, C-terminal globular domain
CPIJ012829	0.0222294	0.0258722	375	105.087	269.913	18	11.3608	6	6.63915	fibrinogen and fibronectin	3	C:extracellular space; P:signal transduction; F:receptor binding	-	PF00147	Fibrinogen beta and gamma chains, C-terminal globular domain
CPIJ013025	0.0173072	0.0186489	477	130.323	346.677	9	2.6953	6	6.3047	salivary secreted angiopoietin, putative	2	P:signal transduction; F:receptor binding	-	PF00147	Fibrinogen beta and gamma chains, C-terminal globular domain
CPIJ013288	0.0126273	0.0177154	297	59.4202	237.58	9	4.98166	3	4.01834	fibrinogen and fibronectin	2	P:signal transduction; F:receptor binding	-	PF00147	Fibrinogen beta and gamma chains, C-terminal globular domain
CPIJ013290	0.0173073	0.0201293	519	114.547	404.453	21	13.2686	7	7.73141	conserved hypothetical protein	3	C:extracellular space; P:signal transduction; F:receptor binding	-	PF00147	Fibrinogen beta and gamma chains, C-terminal globular domain
CPIJ013294	0.0117925	0.0118873	687	178.203	508.797	10	3.97564	6	6.02436	fibrinogen and fibronectin	2	P:signal transduction; F:receptor binding	-	PF00147	Fibrinogen beta and gamma chains, C-terminal globular domain
CPIJ013538	0.0210735	0.0320322	447	114.83	332.17	29	19.622	7	9.37803	ficolin-1 precursor	3	C:extracellular space; P:signal transduction; F:receptor binding	-	PF00147	Fibrinogen beta and gamma chains, C-terminal globular domain
CPIJ015014	0.0206569	0.0198134	267	73.3599	193.64	10	6.39081	4	3.60919	conserved hypothetical protein	3	C:extracellular space; P:signal transduction; F:receptor binding	-	PF00147	Fibrinogen beta and gamma chains, C-terminal globular domain
CPIJ017837	0.0110112	0.0158914	816	180.283	635.717	20	10.292	7	9.70801	angiopoietin 2	2	P:signal transduction; F:receptor binding	-	PF00147	Fibrinogen beta and gamma chains, C-terminal globular domain
CPIJ018858	0.0155864	0.0194221	252	59.5252	192.475	8	4.38994	3	3.61006	fibrinogen and fibronectin	4	F:ATP binding; P:signal transduction; F:receptor binding; P:tRNA processing	-	PF00147	Fibrinogen beta and gamma chains, C-terminal globular domain
CPIJ019016	0.0150077	0.0220829	603	136.572	466.428	15	5.08376	7	9.91624	angiopoietin-2	3	C:extracellular space; P:signal transduction; F:receptor binding	-	PF00147	Fibrinogen beta and gamma chains, C-terminal globular domain
CPIJ019274	0.0186814	0.0168454	618	243.295	374.705	14	8.10419	7	5.89581	ficolin-3 precursor	2	P:signal transduction; F:receptor binding	-	PF00147	Fibrinogen beta and gamma chains, C-terminal globular domain
CPIJ019276	0.0120246	0.0153368	318	68.5112	249.489	8	4.31998	3	3.68002	conserved hypothetical protein	2	P:signal transduction; F:receptor binding	-	PF00147	Fibrinogen beta and gamma chains, C-terminal globular domain
CPIJ019278	0.0172778	0.0192566	513	107.856	405.144	10	2.39846	7	7.60154	netrin receptor	2	P:signal transduction; F:receptor binding	-	PF00147	Fibrinogen beta and gamma chains, C-terminal globular domain
