# Supplementary material for: Genetic divergence between populations of feral and domestic forms of a mosquito disease vector assessed by transcriptomics
Source: PeerJ. 2015 Feb 26;3:e807. doi: 10.7717/peerj.807 (PMC4349049; doi:10.7717/peerj.807)
Supplement: Table S5 — Gene set composing the odorant binding ontology, found to be enriched in the 95th percentile of top-scoring Culex pipiens forms pipiens and molestus homologous codon sequence alignments as ranked by Ka value. [file peerj-03-807-s006.xlsx]

## Sheet: Table S5.
Cx. quinq reference	Observed Ka	Ka	Length	S-Sites	N-Sites	# Subst.	S-Subst.	Observed N-Subst.	Modeled N-Subst.	Annotation	# GO terms	GO terms	Enzyme code	Pfam ID	Pfam annotation	MEA OBP family	MEA OBP subfamily
CPIJ001874	0.0153424	0.0185712	354	28.1063	325.894	15	10.2376	5	4.7624	odorant-binding protein 56a	1	F:odorant binding	-	PF01395	PBP/GOBP family	Classic	minusC
CPIJ002109	0.0109483	0.016195	258	75.3233	182.677	8	5.31203	2	2.68797	odorant-binding protein	1	F:odorant binding	-	PF01395	PBP/GOBP family	PlusC	mplus5
CPIJ009586	0.0111211	0.012013	435	75.3241	359.676	5	0.786091	4	4.21391	odorant-binding protein 14	1	F:odorant binding	-	PF01395	PBP/GOBP family	Classic	pbprp4
CPIJ014525	0.0117745	0.011766	411	71.284	339.716	10	6.17026	4	3.82974	odorant-binding protein	1	F:odorant binding	-	PF01395	PBP/GOBP family	Classic	mclassic6
CPIJ014551	0.0174451	0.0214593	597	138.418	458.582	29	20.0725	8	8.92752	long form d7 salivary protein	1	F:odorant binding	-	PF01395	PBP/GOBP family
CPIJ014553	0.0225172	0.0277317	237	59.3581	177.642	6	1.31395	4	4.68605	salivary long d7 protein 3	1	F:odorant binding	-	PF01395	PBP/GOBP family
CPIJ014916	0.0141561	0.0161282	252	40.0766	211.923	11	8.09047	3	2.90953	conserved hypothetical protein	1	F:odorant binding
CPIJ016965	0.0273204	0.0305592	357	64.1793	292.821	15	6.85827	8	8.14173	odorant-binding protein 56e	1	F:odorant binding	-	PF01395	PBP/GOBP family	Classic	pbprp2/5
CPIJ017432	0.0156855	0.0160792	243	51.7398	191.26	5	2.08798	3	2.91202	odorant-binding protein 56a	1	F:odorant binding	-	PF01395	PBP/GOBP family	Classic	minusC
CPIJ018735	0.0138688	0.0162026	453	92.4789	360.521	11	5.39108	5	5.60892	d7 protein	1	F:odorant binding	-	PF01395	PBP/GOBP family
CPIJ018736	0.0160142	0.0166399	246	58.6665	187.334	14	11.2686	3	2.73143	d7 protein	1	F:odorant binding	-	PF01395	PBP/GOBP family
CPIJ800090	0.0106299	0.01163	678	113.552	564.448	12	5.6611	6	6.3389	d7 protein	1	F:odorant binding	-	PF01395	PBP/GOBP family
CPIJ800103	0.015677	0.0172905	264	72.6371	191.363	7	3.79165	3	3.20835	long form d7clu2 salivary protein	2	F:odorant binding; C:extracellular region		PF01395	PBP/GOBP family
CPIJ801510	0.0140064	0.014233	1629	343.874	1285.13	59	41.7497	18	17.2503	conserved hypothetical protein	4	F:guanine deaminase activity; F:odorant binding; F:zinc ion binding; P:guanine catabolic process	EC:3.5.4.3	PF00024	PAN domain
CPIJ801713	0.0124922	0.0168302	411	90.7997	320.2	14	8.87044	4	5.12956	hypothetical protein CpipJ_CPIJ001871	1	F:odorant binding	-	PF01395	PBP/GOBP family	Classic	minusC
CPIJ801729	0.0154384	0.0179693	408	84.1317	323.868	11	5.53118	5	5.46882	protein	1	F:odorant binding	-	PF01395	PBP/GOBP family	Classic	minusC
