# Supplementary material for: Genetic divergence between populations of feral and domestic forms of a mosquito disease vector assessed by transcriptomics
Source: PeerJ. 2015 Feb 26;3:e807. doi: 10.7717/peerj.807 (PMC4349049; doi:10.7717/peerj.807)
Supplement: Table S6 — Gene set composing the extracellular space ontology, found to be enriched in the 95th percentile of top-scoring Culex pipiens forms pipiens and molestus homologous codon sequence alignments as ranked by Ka value. [file peerj-03-807-s007.xlsx]

## Sheet: Table S6.
Cx. quinq reference	Observed Ka	Ka	Length	S-Sites	N-Sites	# Subst.	S-Subst.	Observed N-Subst.	Modeled N-Subst.	Annotation	# GO terms	GO terms	Enzyme code	Pfam ID	Pfam annotation
CPIJ015014	0.0206569	0.0198134	267	73.3599	193.64	10	6.39081	4	3.60919	angiopoietin 2	3	C:extracellular space; P:signal transduction; F:receptor binding	-	PF00147	Fibrinogen beta and gamma chains, C-terminal globular domain
CPIJ013290	0.0173073	0.0201293	519	114.547	404.453	21	13.2686	7	7.73141	fibrinogen and fibronectin	3	C:extracellular space; P:signal transduction; F:receptor binding	-	PF00147	Fibrinogen beta and gamma chains, C-terminal globular domain
CPIJ000868	0.0169059	0.0124129	396	100.245	295.755	12	8.62384	5	3.37616	fibrinogen and fibronectin	3	C:extracellular space; P:signal transduction; F:receptor binding	-	PF00147	Fibrinogen beta and gamma chains, C-terminal globular domain
CPIJ013538	0.0210735	0.0320322	447	114.83	332.17	29	19.622	7	9.37803	fibrinogen and fibronectin	3	C:extracellular space; P:signal transduction; F:receptor binding	-	PF00147	Fibrinogen beta and gamma chains, C-terminal globular domain
CPIJ019016	0.0150077	0.0220829	603	136.572	466.428	15	5.08376	7	9.91624	fibrinogen and fibronectin	3	C:extracellular space; P:signal transduction; F:receptor binding	-	PF00147	Fibrinogen beta and gamma chains, C-terminal globular domain
CPIJ004127	0.016339	0.0181994	561	132.576	428.424	25	17.7043	7	7.29566	macroglobulin complement	3	C:extracellular space; F:endopeptidase inhibitor activity; P:negative regulation of endopeptidase activity	-	PF07677	A-macroglobulin receptor
CPIJ020144	0.0147085	0.0154247	276	72.0357	203.964	12	9.23433	3	2.76567	macroglobulin complement	4	P:negative regulation of endopeptidase activity; C:extracellular space; C:extracellular region; F:endopeptidase inhibitor activity		PF07703	Alpha-2-macroglobulin family N-terminal region
CPIJ012627	0.0214417	0.0275637	249	62.4481	186.552	7	2.01033	4	4.98967	fibrinogen and fibronectin	3	C:extracellular space; P:signal transduction; F:receptor binding	-	PF00147	Fibrinogen beta and gamma chains, C-terminal globular domain
CPIJ012829	0.0222294	0.0258722	375	105.087	269.913	18	11.3608	6	6.63915	fibrinogen and fibronectin	3	C:extracellular space; P:signal transduction; F:receptor binding	-	PF00147	Fibrinogen beta and gamma chains, C-terminal globular domain
CPIJ006840	0.0109442	0.0126104	411	136.882	274.118	8	4.83282	3	3.16718	cd109 antigen	3	C:extracellular space; F:endopeptidase inhibitor activity; P:negative regulation of endopeptidase activity	-	PF07703	Alpha-2-macroglobulin family N-terminal region
