# Supplementary material for: Genetic divergence between populations of feral and domestic forms of a mosquito disease vector assessed by transcriptomics
Source: PeerJ. 2015 Feb 26;3:e807. doi: 10.7717/peerj.807 (PMC4349049; doi:10.7717/peerj.807)
Supplement: Table S7 — Gene set composing the chitin binding ontology, found to be enriched in the 95th percentile of top-scoring Culex pipiens forms pipiens and molestus homologous codon sequence alignments as ranked by Ka value. [file peerj-03-807-s008.xlsx]

## Sheet: Table S7.
Cx. quinq reference	Observed Ka	Ka	Length	S-Sites	N-Sites	# Subst.	S-Subst.	Observed N-Subst.	Modeled N-Subst.	Annotation	# GO terms	GO terms	Enzyme code	Pfam ID	Pfam annotation
CPIJ003965	0.0165909	0.0168628	228	47.1777	180.822	10	7.2051	3	2.7949	conserved hypothetical protein	3	C:extracellular region; F:chitin binding; P:chitin metabolic process	-	PF01607	Chitin binding Peritrophin-A domain
CPIJ014197	0.0271649	0.027706	231	83.7508	147.249	10	6.2429	4	3.7571	conserved hypothetical protein	3	C:extracellular region; F:chitin binding; P:chitin metabolic process	-	PF01607	Chitin binding Peritrophin-A domain
CPIJ014187	0.0117485	0.0124873	768	172.178	595.822	15	7.7445	7	7.2555	conserved hypothetical protein	3	C:extracellular region; F:chitin binding; P:chitin metabolic process	-	PF01607	Chitin binding Peritrophin-A domain
CPIJ014182	0.0157416	0.0155451	249	58.422	190.578	5	2.1054	3	2.8946	conserved hypothetical protein	3	C:extracellular region; F:chitin binding; P:chitin metabolic process	-	PF01607	Chitin binding Peritrophin-A domain
CPIJ010502	0.0201783	0.0199304	333	85.2095	247.791	13	8.40195	5	4.59805	g-box-binding factor	3	C:extracellular region; F:chitin binding; P:chitin metabolic process	-	PF01607	Chitin binding Peritrophin-A domain
CPIJ004536	0.0230623	0.0274342	540	149.753	390.247	23	12.9785	9	10.0215	conserved hypothetical protein	3	C:extracellular region; F:chitin binding; P:chitin metabolic process	-	PF01607	Chitin binding Peritrophin-A domain
CPIJ008557	0.0161187	0.0191677	582	147.723	434.277	19	10.9577	7	8.04231	conserved hypothetical protein	3	C:extracellular region; F:chitin binding; P:chitin metabolic process	-	PF01607	Chitin binding Peritrophin-A domain
CPIJ003958	0.0305438	0.0320849	312	82.8215	229.179	11	4.04041	7	6.95959	hypothetical protein CpipJ_CPIJ003958	3	C:extracellular region; F:chitin binding; P:chitin metabolic process	-	PF01607	Chitin binding Peritrophin-A domain
CPIJ007902	0.0123004	0.0126927	780	210.915	569.085	11	3.85539	7	7.14461	conserved hypothetical protein	3	C:extracellular region; F:chitin binding; P:chitin metabolic process	-	PF01607	Chitin binding Peritrophin-A domain
CPIJ014183	0.0179076	0.0177996	384	104.789	279.211	7	2.16186	5	4.83814	conserved hypothetical protein	3	C:extracellular region; F:chitin binding; P:chitin metabolic process	-	PF01607	Chitin binding Peritrophin-A domain
CPIJ014195	0.0133492	0.0134207	711	186.624	524.376	16	9.27736	7	6.72264	conserved hypothetical protein	3	C:extracellular region; F:chitin binding; P:chitin metabolic process	-	PF01607	Chitin binding Peritrophin-A domain
CPIJ019598	0.0117946	0.0129501	441	101.863	339.137	17	12.895	4	4.10496	basic endochitinase chb4	3	F:chitinase activity; P:chitin catabolic process; P:cell wall macromolecule catabolic process	EC:3.2.1.14	PF00182	Chitinase class I
CPIJ006585	0.0109792	0.0107775	333	59.7554	273.245	7	4.10765	3	2.89235	glycoprotein	4	F:chitinase activity; P:carbohydrate metabolic process; P:chitin catabolic process; F:cation binding	EC:3.2.1.14	PF00704	Glycosyl hydrolases family 18
CPIJ009520	0.0127864	0.0134863	1056	195.709	860.291	28	16.7815	11	11.2185	gpi-anchor transamidase	5	F:chitin binding; P:proteolysis; P:chitin metabolic process; C:extracellular region; F:cysteine-type endopeptidase activity		PF00050	Kazal-type serine protease inhibitor domain
CPIJ014179	0.0106778	0.0118094	597	128.74	468.26	16	10.7102	5	5.28984	af373879_1peritrophin-like protein 1	3	C:extracellular region; F:chitin binding; P:chitin metabolic process	-
CPIJ016723	0.013886	0.013729	606	245.924	360.076	21	16.7709	5	4.22906	conserved hypothetical protein	3	F:chitin binding; P:chitin metabolic process; C:extracellular region
CPIJ008500	0.0149091	0.01623	252	50.7812	201.219	5	1.79091	3	3.20909	conserved hypothetical protein	3	C:extracellular region; F:chitin binding; P:chitin metabolic process	-
