# Supplementary material for: Genetic divergence between populations of feral and domestic forms of a mosquito disease vector assessed by transcriptomics
Source: PeerJ. 2015 Feb 26;3:e807. doi: 10.7717/peerj.807 (PMC4349049; doi:10.7717/peerj.807)
Supplement: Table S12 — Gene ontology terms enriched in the set of 3,687 Culex quinquefasciatus CDS sequences with at least one BLASTN alignment >200 bp at >95% homology to another CDS in the genome. [file peerj-03-807-s013.xlsx]

## Sheet: Table S12.
GO ID	Go Term	Adjusted p-val	p-val	# in test group	# in reference group
GO:0000786	nucleosome	7.6e-38	3.7e-41	99	34
GO:0006334	nucleosome assembly	3.5e-37	9.4e-40	107	47
GO:0046982	protein heterodimerization activity	2.6e-28	1.3e-30	87	43
GO:0005811	lipid particle	3.1e-11	3.6e-13	18	0
GO:0006426	glycyl-tRNA aminoacylation	2.8e-07	4.6e-09	17	4
GO:0004820	glycine-tRNA ligase activity	2.8e-07	4.6e-09	17	4
GO:0006420	arginyl-tRNA aminoacylation	1.4e-06	2.5e-08	11	0
GO:0004814	arginine-tRNA ligase activity	1.4e-06	2.5e-08	11	0
GO:0003677	DNA binding	1.6e-06	2.9e-08	275	732
GO:0003735	structural constituent of ribosome	4.8e-05	9.4e-07	91	188
GO:0050567	glutaminyl-tRNA synthase (glutamine-hydrolyzing) activity	0.00023	5e-06	11	3
GO:0030956	glutamyl-tRNA(Gln) amidotransferase complex	0.00023	5e-06	11	3
GO:0070681	glutaminyl-tRNAGln biosynthesis via transamidation	0.00023	5e-06	11	3
GO:0006310	DNA recombination	0.00032	7.2e-06	22	21
GO:0031409	pigment binding	0.0005	1.1e-05	12	5
GO:0003910	DNA ligase (ATP) activity	0.0005	1.1e-05	12	5
GO:0030060	L-malate dehydrogenase activity	0.00055	1.3e-05	14	8
GO:0016075	rRNA catabolic process	0.00091	2.2e-05	9	2
GO:0032543	mitochondrial translation	0.0016	3.9e-05	11	5
GO:0005643	nuclear pore	0.0019	5.2e-05	25	32
GO:0030301	cholesterol transport	0.0026	7.3e-05	9	3
GO:0042302	structural constituent of cuticle	0.0028	8.2e-05	63	134
GO:0006108	malate metabolic process	0.0032	9.5e-05	14	11
GO:0005524	ATP binding	0.0058	0.00017	308	955
GO:0004525	ribonuclease III activity	0.0063	0.00019	9	4
GO:0030127	COPII vesicle coat	0.011	0.00037	11	8
GO:0003857	3-hydroxyacyl-CoA dehydrogenase activity	0.012	0.00042	6	1
GO:0051103	DNA ligation involved in DNA repair	0.012	0.00042	6	1
GO:0004527	exonuclease activity	0.016	0.00058	21	30
GO:0008158	hedgehog receptor activity	0.041	0.0017	9	7
GO:0006433	prolyl-tRNA aminoacylation	0.041	0.0017	4	0
GO:0004827	proline-tRNA ligase activity	0.041	0.0017	4	0
GO:0045028	G-protein coupled purinergic nucleotide receptor activity	0.041	0.0017	4	0
GO:0035589	G-protein coupled purinergic nucleotide receptor signaling pathway	0.041	0.0017	4	0
GO:0008113	peptide-methionine (S)-S-oxide reductase activity	0.041	0.0017	4	0
GO:0004602	glutathione peroxidase activity	0.041	0.0018	5	1
GO:0015876	acetyl-CoA transport	0.042	0.0019	11	11
GO:0008521	acetyl-CoA transporter activity	0.042	0.0019	11	11
GO:0005097	Rab GTPase activator activity	0.042	0.0019	16	22
GO:0032851	positive regulation of Rab GTPase activity	0.042	0.0019	16	22
GO:0070403	NAD+ binding	0.048	0.0022	7	4
