# Supplementary material for: Genetic divergence between populations of feral and domestic forms of a mosquito disease vector assessed by transcriptomics
Source: PeerJ. 2015 Feb 26;3:e807. doi: 10.7717/peerj.807 (PMC4349049; doi:10.7717/peerj.807)
Supplement: Table S13 — Extended analysis for all genes belonging to the GO terms from the slowest-evolving set (Table 2) for which all members were present only in the test set, and contained only synonymous substitutions. [file peerj-03-807-s014.xlsx]

## Sheet: Table S13.
	Cx. quinq reference	Count Ka	Model Ka	Model Ks	Model Ka/Ks	Aln. Length	S-Sites	N-Sites	# Subst.	Count N-Subst.	Model S-Subst.	Modeled N-Subst.	Annotation	#GO terms	GO terms	Enzyme code	Top Pfam ID	Top Pfam annotation
Membrane-bound periplasmic space	CPIJ006667	0	3.32e-05	0.0332042	0.001	765	119.822	645.178	4	0	3.97858	0.0214226	glutamate receptor	9	C:postsynaptic membrane; C:cell junction; C:plasma membrane; F:extracellular-glutamate-gated ion channel activity; P:ion transport; F:ionotropic glutamate receptor activity; C:integral to membrane; P:ionotropic glutamate receptor signaling pathway; C:outer membrane-bounded periplasmic space	-	PF00497	Bacterial extracellular solute-binding proteins, family 3
Membrane-bound periplasmic space	CPIJ013901	0	7.5e-05	0.0749876	0.001	1962	287.875	1674.13	20	0	19.8844	0.115637	glutamate receptor	9	C:postsynaptic membrane; C:cell junction; C:plasma membrane; F:extracellular-glutamate-gated ion channel activity; P:ion transport; F:ionotropic glutamate receptor activity; C:integral to membrane; P:ionotropic glutamate receptor signaling pathway; C:outer membrane-bounded periplasmic space	-	PF00497	Bacterial extracellular solute-binding proteins, family 3
Membrane-bound periplasmic space	CPIJ018689	0	3e-05	0.0299597	0.001	2562	467.493	2094.51	14	0	13.9376	0.0624443	glutamate receptor	9	C:postsynaptic membrane; C:cell junction; C:plasma membrane; F:extracellular-glutamate-gated ion channel activity; P:ion transport; F:ionotropic glutamate receptor activity; C:integral to membrane; P:ionotropic glutamate receptor signaling pathway; C:outer membrane-bounded periplasmic space	-	PF01094	Receptor family ligand binding region
Membrane-bound periplasmic space	CPIJ019599	0	NA	NA	NA	237	26.5856	210.414	0	0	NA	NA	glutamate ionotropic kainate 3	10	C:postsynaptic membrane; C:cell junction; C:plasma membrane; F:extracellular-glutamate-gated ion channel activity; P:ion transport; F:ionotropic glutamate receptor activity; F:transferase activity; C:integral to membrane; P:ionotropic glutamate receptor signaling pathway; C:outer membrane-bounded periplasmic space	-	PF01094	Receptor family ligand binding region
Membrane-bound periplasmic space	CPIJ009222	0	9.49e-05	0.0949216	0.001	258	68.6293	189.371	6	0	5.98349	0.0165104	conserved hypothetical protein	6	F:extracellular-glutamate-gated ion channel activity; P:ion transport; F:ionotropic glutamate receptor activity; C:integral to membrane; P:ionotropic glutamate receptor signaling pathway; C:outer membrane-bounded periplasmic space	-	PF00497	Bacterial extracellular solute-binding proteins, family 3
Membrane-bound periplasmic space	CPIJ008416	0	0.000139519	0.139519	0.001	156	14.1931	141.807	2	0	1.98022	0.0197848	glutamate ionotropic subunit 3	9	C:postsynaptic membrane; C:cell junction; C:plasma membrane; F:extracellular-glutamate-gated ion channel activity; P:ion transport; F:ionotropic glutamate receptor activity; C:integral to membrane; P:ionotropic glutamate receptor signaling pathway; C:outer membrane-bounded periplasmic space	-
Membrane-bound periplasmic space	CPIJ019093	0	NA	NA	NA	864	183.17	680.83	0	0	NA	NA	conserved hypothetical protein	7	C:Golgi apparatus; F:galactosyltransferase activity; P:transport; P:protein glycosylation; C:integral to membrane; C:outer membrane-bounded periplasmic space; F:transporter activity	-	PF01762	Galactosyltransferase
Membrane-bound periplasmic space	CPIJ017065	0	1.94e-05	0.0193892	0.001	540	107.593	432.407	2	0	1.99199	0.00800568	nmda-type glutamate receptor subunit 1	14	F:extracellular-glutamate-gated ion channel activity; C:cell junction; C:outer membrane-bounded periplasmic space; F:ionotropic glutamate receptor activity; P:ion transport; P:ionotropic glutamate receptor signaling pathway; C:N-methyl-D-aspartate selective glutamate receptor complex; P:long-term memory; P:synaptic transmission; P:calcium ion homeostasis; C:postsynaptic membrane; P:regulation of …	-	PF00497	Bacterial extracellular solute-binding proteins, family 3
MAPK cascade	CPIJ004910	0	4.73e-05	0.0473477	0.001	1047	183.785	863.215	8	0	7.9626	0.0373993	serine threonine kinase nlk	4	F:MAP kinase activity; P:MAPK cascade; P:protein phosphorylation; F:ATP binding	EC:2.7.11.24	PF00069	Protein kinase domain
MAPK cascade	CPIJ002175	0	2.89e-05	0.0289427	0.001	246	69.809	176.191	2	0	1.99496	0.00503509	p38 mapk	4	F:MAP kinase activity; P:MAPK cascade; P:protein phosphorylation; F:ATP binding	EC:2.7.11.24	PF00069	Protein kinase domain
MAPK cascade	CPIJ017417	0	9.49e-05	0.0949377	0.001	528	101.263	426.737	9	0	8.96223	0.0377681	conserved hypothetical protein	10	C:lysosome; P:positive regulation of MAPK cascade; C:late endosome membrane; P:regulation of receptor recycling; P:positive regulation of TOR signaling cascade; C:membrane raft; P:cellular response to amino acid stimulus; P:cholesterol homeostasis; P:endosome organization; P:lysosome organization	-
MAPK cascade	CPIJ001158	0	1.93e-05	0.0192546	0.001	1107	159.094	947.906	3	0	2.98223	0.0177686	aael008634- partial	4	F:MAP kinase activity; P:MAPK cascade; P:protein phosphorylation; F:ATP binding	EC:2.7.11.24	PF00069	Protein kinase domain
MAPK cascade	CPIJ002878	0	9.46e-06	0.00945853	0.001	2607	634.747	1972.25	6	0	5.98141	0.0185851	mixed lineage kinase	4	F:ATP binding; F:protein tyrosine kinase activity; P:activation of MAPKK activity; F:MAP kinase kinase kinase activity	EC:2.7.10.0; EC:2.7.11.25	PF00018	SH3 domain
MAPK cascade	CPIJ005303	0	1.41e-05	0.0140516	0.001	825	141.649	683.351	2	0	1.9904	0.00960218	shaggy-like protein kinase	4	F:MAP kinase activity; P:MAPK cascade; P:protein phosphorylation; F:ATP binding	EC:2.7.11.24	PF00069	Protein kinase domain
MAPK cascade	CPIJ002174	0	5.88e-05	0.0588437	0.001	567	69.8751	497.125	4	0	3.97174	0.0282569	p38 mapk	4	F:MAP kinase activity; P:MAPK cascade; P:protein phosphorylation; F:ATP binding	EC:2.7.11.24	PF00069	Protein kinase domain
V-Type ATPase	CPIJ002067	0	2.01e-05	0.020114	0.001	1206	247.662	958.338	5	0	4.98073	0.0192731	vacuolar atp synthase subunit c	3	F:hydrolase activity, acting on acid anhydrides, catalyzing transmembrane movement of substances; P:ATP hydrolysis coupled proton transport; C:proton-transporting V-type ATPase, V1 domain	EC:3.6.3.0	PF03223	V-ATPase subunit C
V-Type ATPase	CPIJ017121	0	1.15e-05	0.0115099	0.001	594	86.374	507.626	1	0	0.994157	0.00584273	vacuolar h+-atpase v0 sector accessory subunit s1 ac45	4	P:ATP hydrolysis coupled proton transport; F:proton-transporting ATPase activity, rotational mechanism; C:proton-transporting V-type ATPase, V1 domain; F:hydrogen ion transporting ATP synthase activity, rotational mechanism	-
V-Type ATPase	CPIJ003418	0	3.13e-05	0.0313376	0.001	1476	306.566	1169.43	9	0	8.9658	0.0342011	v-type atp synthase beta chain	5	P:ATP metabolic process; F:ATP binding; F:hydrolase activity, acting on acid anhydrides, catalyzing transmembrane movement of substances; P:ATP hydrolysis coupled proton transport; C:proton-transporting V-type ATPase, V1 domain	EC:3.6.3.0	PF00306	ATP synthase alpha/beta chain, C terminal domain
V-Type ATPase	CPIJ007772	0	1.38e-05	0.0137704	0.001	1842	376.388	1465.61	5	0	4.98061	0.0193939	atp synthase alpha subunit vacuolar	6	F:hydrogen ion transporting ATP synthase activity, rotational mechanism; P:ATP biosynthetic process; F:ATP binding; F:proton-transporting ATPase activity, rotational mechanism; P:ATP hydrolysis coupled proton transport; C:proton-transporting V-type ATPase, V1 domain	-	PF00306	ATP synthase alpha/beta chain, C terminal domain
V-Type ATPase	CPIJ016432	0	1.82e-05	0.0181793	0.001	381	56.3095	324.69	1	0	0.994267	0.00573312	vacuolar atp synthase subunit f	4	P:ATP hydrolysis coupled proton transport; F:proton-transporting ATPase activity, rotational mechanism; C:proton-transporting V-type ATPase, V1 domain; F:hydrogen ion transporting ATP synthase activity, rotational mechanism	-	PF01990	ATP synthase (F/14-kDa) subunit
V-Type ATPase	CPIJ002428	0	5.1e-05	0.0509721	0.001	1422	197.937	1224.06	10	0	9.93854	0.0614608	vacuolar atp synthase subunit h	3	C:vacuolar proton-transporting V-type ATPase, V1 domain; F:proton-transporting ATPase activity, rotational mechanism; P:ATP hydrolysis coupled proton transport	-	PF11698	V-ATPase subunit H
Transcription regulatory region	CPIJ801758	0	4.7e-05	0.0469577	0.001	477	89.9436	387.056	4	0	3.98286	0.0171395	aael012058- partial	7	P:regulation of transcription, DNA-dependent; F:sequence-specific DNA binding; P:multicellular organismal development; F:transcription regulatory region sequence-specific DNA binding; C:nucleus; F:sequence-specific DNA binding transcription factor activity; F:DNA binding	-
Transcription regulatory region	CPIJ001021	0	2.6e-05	0.0259922	0.001	336	38.3674	297.633	1	0	0.992302	0.00769771	homeobox protein abdominal-b	4	F:sequence-specific DNA binding transcription factor activity; F:transcription regulatory region sequence-specific DNA binding; C:nucleus; P:regulation of transcription, DNA-dependent	-	PF00046	Homeobox domain
Transcription regulatory region	CPIJ004950	0	NA	NA	NA	348	84.5391	263.461	0	0	NA	NA	distal- isoform a	4	F:sequence-specific DNA binding transcription factor activity; F:transcription regulatory region sequence-specific DNA binding; C:nucleus; P:regulation of transcription, DNA-dependent	-	PF00046	Homeobox domain
Transcription regulatory region	CPIJ004183	0	8.37e-05	0.0837446	0.001	1032	162.478	869.522	13	0	12.9308	0.0692006	recombining binding protein suppressor of hairless	4	P:regulation of transcription, DNA-dependent; F:RNA polymerase II core promoter proximal region sequence-specific DNA binding transcription factor activity; F:RNA polymerase II core promoter proximal region sequence-specific DNA binding; C:nucleus	-	PF09271	LAG1, DNA binding
Transcription regulatory region	CPIJ004112	0	2.31e-05	0.02308	0.001	204	44.919	159.081	1	0	0.996471	0.00352901	conserved hypothetical protein	6	P:regulation of transcription, DNA-dependent; F:sequence-specific DNA binding; F:transcription regulatory region sequence-specific DNA binding; C:nucleus; F:sequence-specific DNA binding transcription factor activity; F:DNA binding	-
Transcription regulatory region	CPIJ010064	0	3.08e-05	0.030777	0.001	210	32.3635	177.637	1	0	0.994541	0.00545884	six sine homebox transcription factors	4	F:sequence-specific DNA binding transcription factor activity; F:transcription regulatory region sequence-specific DNA binding; C:nucleus; P:regulation of transcription, DNA-dependent	-	PF00046	Homeobox domain
